# Supplementary material for: Substrate-directed regioselective alkene functionalizations of (E)-β,γ-unsaturated carboxylic acids
Source: Royal Society of Chemistry journal article supplement (doi:10.1039/d4cc03581j), 2024-01-01
Supplement: d4cc03581j1.pdf [file d4cc03581j1.pdf]

## Substrate-Directed Regioselective Alkene Functionalizations of (*E*)- $\beta,\gamma$ -Unsaturated Carboxylic Acids

Chi-Hao Chang,<sup>a</sup> Chao-Ting Yen,<sup>a</sup> Théo P. Goncalves,<sup>b</sup> Yu-Sheng Lin,<sup>a</sup> Yu-Chun Wang,<sup>a</sup> R. Sidick Basha,<sup>a</sup> Bo-Yan Chen,<sup>a</sup> Cheng-Hao Fu,<sup>a</sup> Liang-Wei Chen,<sup>a</sup> Meng-Li Jhou,<sup>a</sup> Kuo-Wei Huang,<sup>b</sup> and Chih-Ming Chou<sup>\*ac</sup>

<sup>a</sup>*Department of Applied Chemistry, National University of Kaohsiung, 700 Kaohsiung University Road, Nanzih District, Kaohsiung 81148, Taiwan*

<sup>b</sup>*KAUST Catalysis Center and Division of Physical Science and Engineering, King Abdullah University of Science and Technology, Thuwal 23955-6900, Saudi Arabia*

<sup>c</sup>*Department of Medicinal and Applied Chemistry, Kaohsiung Medical University, Kaohsiung 80708, Taiwan*

*E-mail: [cmchou@nuk.edu.tw](mailto:cmchou@nuk.edu.tw)*

## Table of Contents

|                          |      |      |
|--------------------------|------|------|
| 1. General Information   |      | S3   |
| 2. General Procedure     |      | S4   |
| 3. Analytical Data       |      | S8   |
| 4. References            |      | S44  |
| 5. NMR Spectra           |      | S45  |
| 6. X-ray Data            | S110 |      |
| 7. Computational Details |      | S129 |

## 1. General Information:

Proton nuclear magnetic resonance ( $^1\text{H}$  NMR) spectra and carbon nuclear magnetic resonance ( $^{13}\text{C}$  NMR) spectra were recorded on a Varian-Mercury-300 (300 MHz) spectrometer. Chemical shifts for protons are reported in parts per million (ppm) downfield from TMS and are referenced to residual proton in the solvent ( $\text{CDCl}_3$   $\delta = 7.26$ ). Chemical shifts for carbon are reported in ppm and are referenced to the carbon signal ( $\text{CDCl}_3$   $\delta = 77.0$  ppm). NMR data are represented as follows: chemical shift, multiplicity (br = broad, s = singlet, d = doublet, t = triplet, q = quartet, m = multiplet), and coupling constants in Hertz (Hz). TLC was examined by using Merck silica gel 60 F-254 plates, and detection of compounds with UV light or dipping into a solution of  $\text{KMnO}_4$  followed by heating. Flash column chromatography was performed by using Merck silica gel 60 (40-63  $\mu\text{m}$ ). Melting point were performed by using Fargo MP-2D. In relative rate experiments the ratio of the products were determined through NMR by using 1,3,5-trimethoxybenzene as internal standard. The single crystal X-ray diffraction data were obtained using a Bruker APEX DUO. The electron impact (EI) mass spectral data were obtained using a SHIMADZU QP2020 and JEOL AccuTOF GCx-plus.

## 2. General Procedure:

### General procedure (Ia) for (*E*)- $\beta,\gamma$ -unsaturated carboxylic acids 1a-1j:<sup>1</sup>

1.2 equiv of (2-carboxyethyl)triphenylphosphonium bromide in dry THF (0.5 M), 1 equiv of aryl aldehyde was added. Then it was cooled to  $-78\text{ }^{\circ}\text{C}$  and 2.5 equiv of *t*-BuOK (1.0 M) was added over 2 h. The mixture was kept for stirring at room temperature for 18 h and the solvent was evaporated under reduced pressure. The obtained residue was dissolved in  $\text{H}_2\text{O}:\text{CH}_2\text{Cl}_2$  (1:1). The organic layer was separated and the aqueous layer was then acidified with HCl 1.0 M to pH = 1. Then, extract with  $\text{Et}_2\text{O}$  (100 mL) and the layers were separated. The obtained organic layers were dried over  $\text{MgSO}_4$  and concentrate under *vacuo*. The residue was purified by flash column chromatography and the pure product of arylbut-3-enoic acids were obtained.

### *Alkylation of carboxylic acids:*<sup>2</sup>

To a 1.0 equiv. of arylbut-3-enoic acids in THF at  $-78\text{ }^{\circ}\text{C}$ , 2.2 equiv. of *n*-BuLi was added and allow it to stir for 40 minutes. Later, 3.0 equiv. of ethyl bromide was added and allow it to warm up to room temperature and was stirred to overnight. The reaction mixture was quenched with HCl solution (10%) and was extracted with  $\text{Et}_2\text{O}$  (2 x), washed with sodium chloride solution, dried over  $\text{MgSO}_4$ , filtered, and concentrated under reduced pressure. The obtained crude residue was subjected to the next step.

*n*-BuLi (2.2 equiv.) was added to the crude residue dissolved in THF at  $-78\text{ }^{\circ}\text{C}$  and allow it to stir for 40 minutes. Later, 3.0 equiv. of ethyl bromide was added and allow it to warm up to room temperature and was stirred to overnight. Then, the mixture was quenched with HCl solution (10%) and was extracted with  $\text{Et}_2\text{O}$  (3 x), washed with sodium chloride solution, dried over  $\text{MgSO}_4$ , filtered, and concentrated under reduced pressure. The crude residue was purified by flash column chromatography and the desired pure products were obtained.



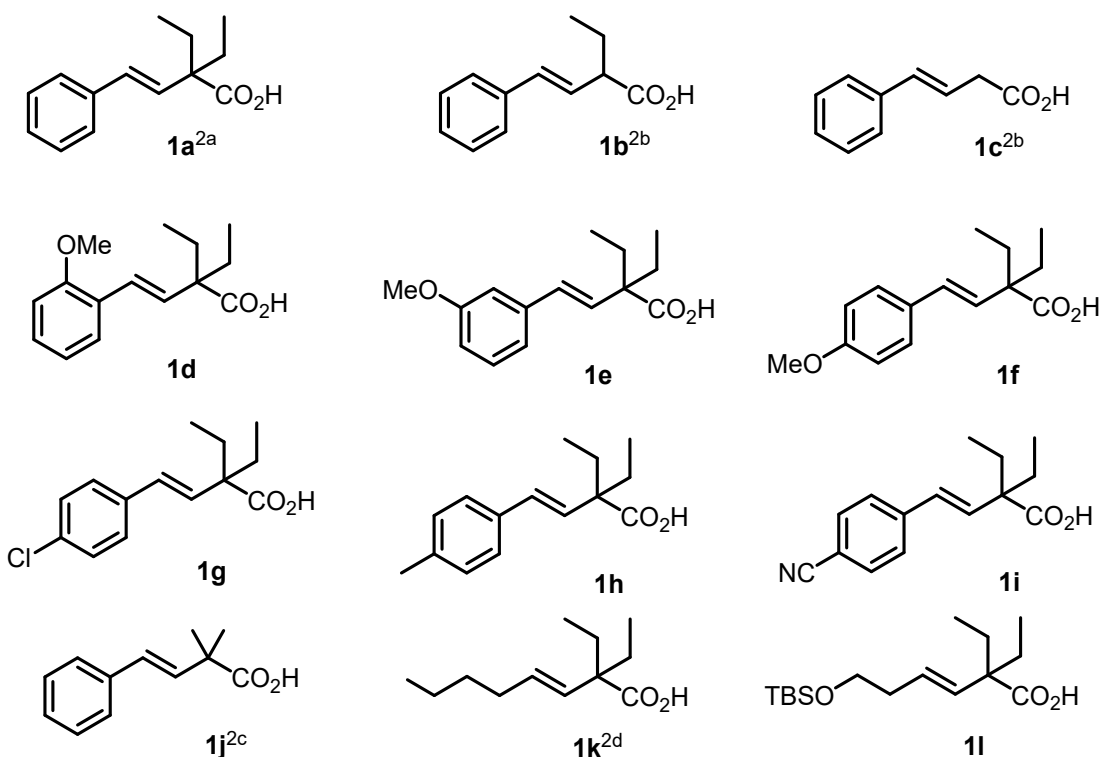

### General procedure (Ib) for (*E*)- $\beta,\gamma$ -unsaturated carboxylic acids **1m-1o**:<sup>3</sup>

In an oven dried 10 mL Schlenk tube under argon were successively placed styrene derivatives (0.5 mmol), alkyl bromide (1 mmol), dry *N,N*-diisopropylethylamine (1 mmol), [Cp\**RuCl*(PPh<sub>3</sub>)<sub>2</sub>] (0.0005 mmol, 0.1%), dry THF (2.0 mL). Then, the reaction mixture was settled in a pre-heated (100 °C) oil bath for 24 h with stirring. Next, the reaction was concentrated under *vacuo* and purified by silica gel column chromatography (EA/Hexane) to give (*E*)- $\beta,\gamma$ -unsaturated carboxylate.

#### Hydrolysis of esters:

To a solution of (*E*)- $\beta,\gamma$ -unsaturated carboxylate (1.0 eq) in water, (0.1 M) NaOH was added (3 eq), and the mixture was reflux in a pre-heated (100 °C) oil bath for 24 h. After cooling to room temperature, the reaction mixture was extracted twice with EtOAc, and the organic phases was discarded. The aqueous phase was acidified with 10% HCl solution then extracted twice with EtOAc. The combined organic layers were dried over MgSO<sub>4</sub>, filtered and the solvent were removed in *vacuo* to yield carboxylic acid.

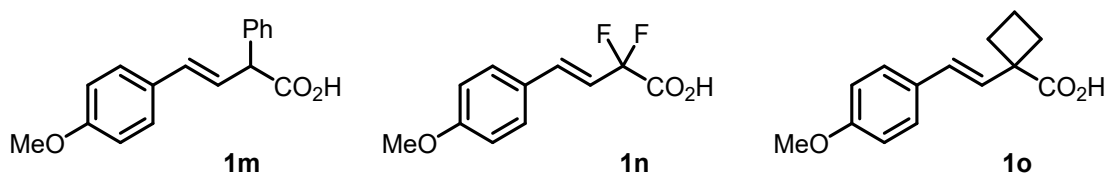

(*E*)-alkenyl bromides **2** were prepared according to the literature procedure<sup>4-8</sup>

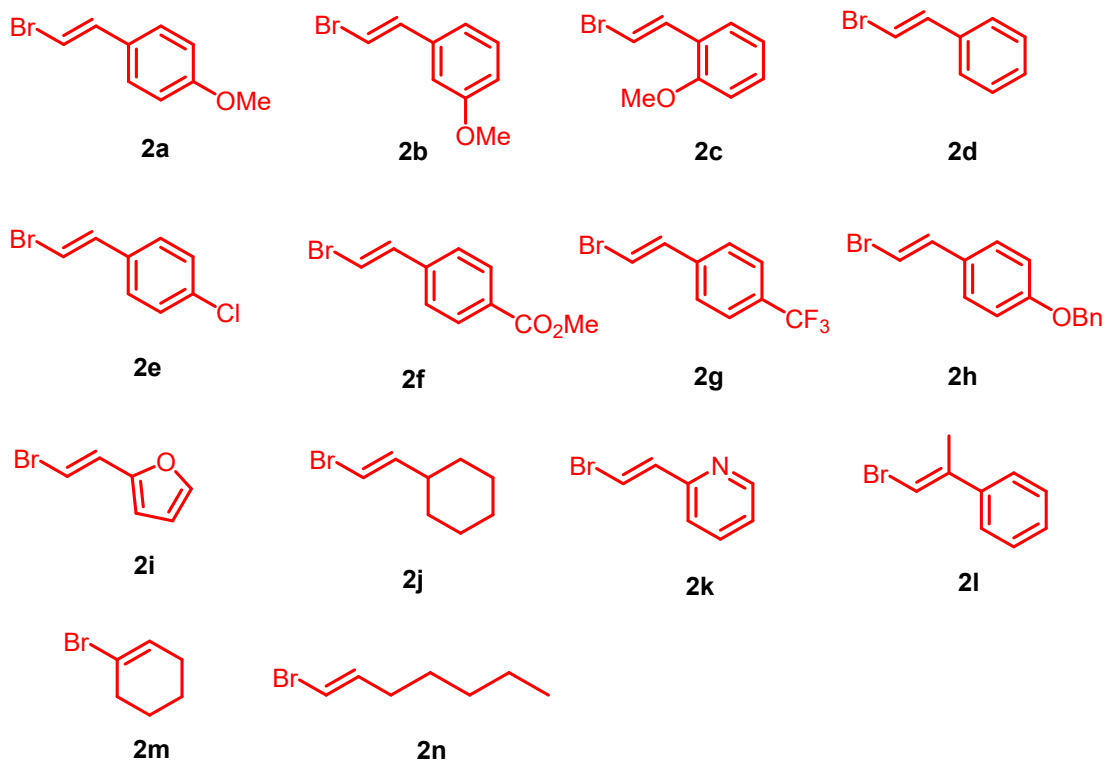

(*Z*)-alkenyl bromides **4** were prepared according to the literature procedure<sup>9</sup>

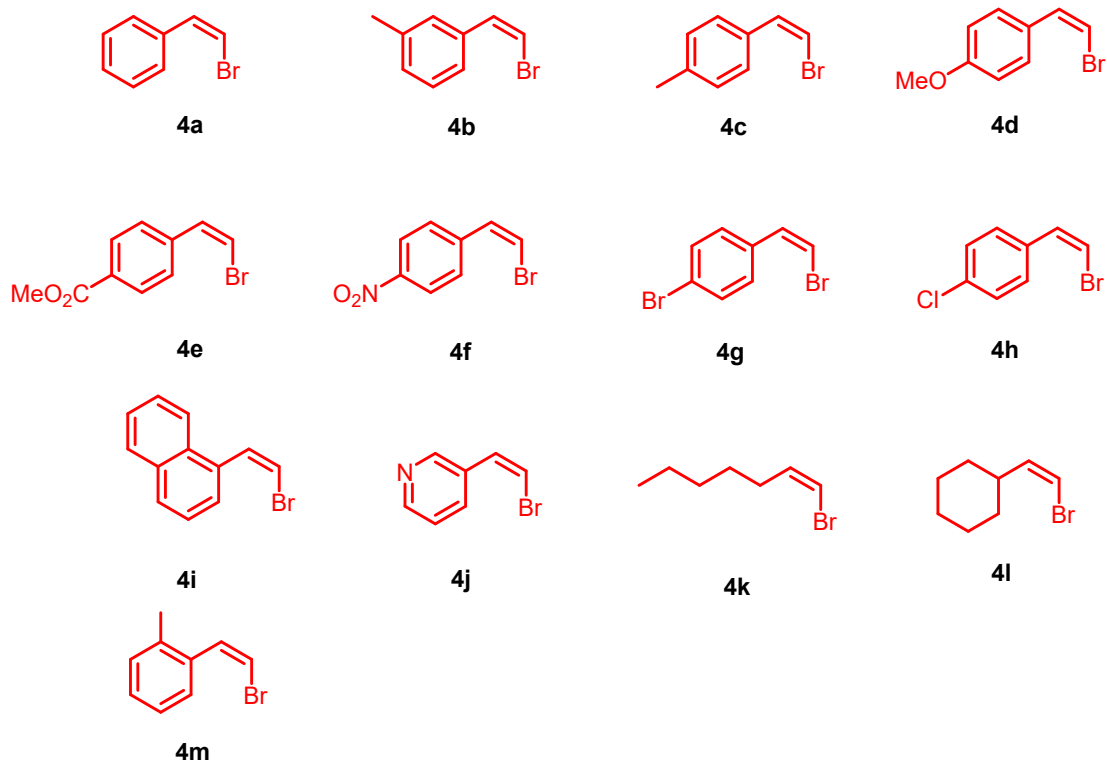

### General procedure for Heck-Type alkenylation (II)

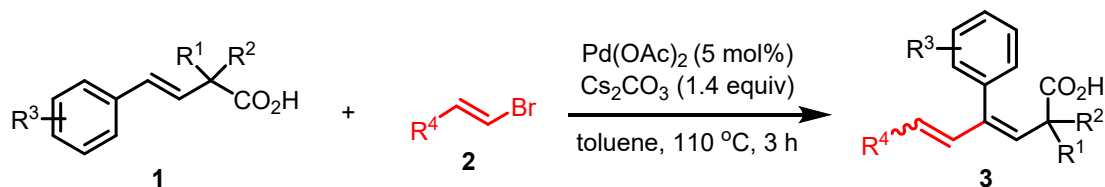

To a screw cap schlenk tube (*E*)-β,γ-unsaturated carboxylic acids (**1**, 0.125 mmol), *trans*-alkenyl bromide (**2**, 0.10 mmol),  $\text{Cs}_2\text{CO}_3$  (0.14 mmol) and  $\text{Pd}(\text{OAc})_2$  (5 mol%) followed by dry toluene (2 ml) were added. The resulting mixture was kept for stirring in a preheated oil bath at 110 °C for 3 h. The obtained mixture was then diluted with EtOAc and filtered through a pad of celite. The solvent was removed under vacuo and the crude residue was purified by flash column chromatography afforded the desired product **3**.

### General procedure for alkenylative lactonization (III)

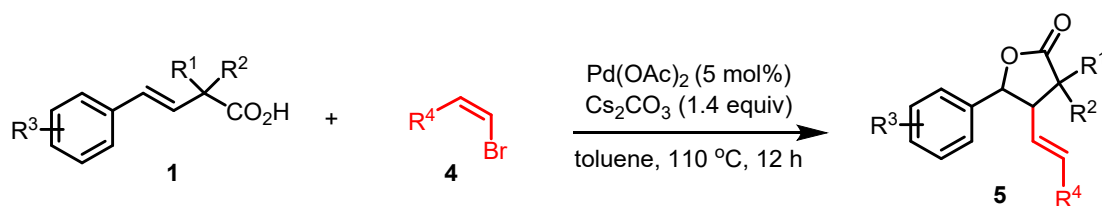

To a screw cap schlenk tube *trans*-β,γ-unsaturated carboxylic acids (**1**, 0.125 mmol), *cis*-alkenyl bromide (**4**, 0.10 mmol),  $\text{Cs}_2\text{CO}_3$  (0.14 mmol) and  $\text{Pd}(\text{OAc})_2$  (5 mol%) followed by dry toluene (2 ml) were added. The resulting mixture was kept for stirring in a preheated oil bath at 110 °C for 12 h. The reaction mixture was then diluted with EtOAc and filtered through a pad of celite and concentrated under vacuo. The crude mixture was then purified by flash column chromatography afforded the desired product.

### 3. Analytical Data

#### (*E*)-2,2-diethyl-4-(2-methoxyphenyl)but-3-enoic acid (**1d**)

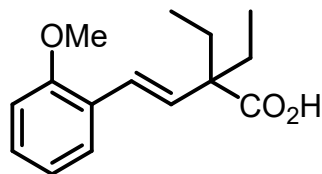

According to general procedure (Ia) with (*E*)-4-(2-methoxyphenyl)but-3-enoic acid (421 mg, 2.2 mmol). The crude product was purified by silica gel column chromatography (ethyl acetate/hexane) to provide **1d** as pale-yellow oil (469 mg, 86%). <sup>1</sup>H NMR (300 MHz, CDCl<sub>3</sub>) δ 10.74 (br, 1H), 7.51 (d, *J* = 6.0 Hz, 1H), 7.29-7.15 (m, 1H), 7.00-6.80 (m, 3H), 6.40 (d, *J* = 18.0 Hz, 1H), 3.85 (s, 3H), 1.92 (q, *J* = 7.3 Hz, 4H), 0.94 (t, *J* = 7.3 Hz, 6H). <sup>13</sup>C NMR (75 MHz, CDCl<sub>3</sub>) δ 182.4, 156.5, 131.2, 128.4, 126.3, 126.3 (overlap), 124.6, 120.6, 110.8, 55.4, 52.8, 28.7, 8.8. HRMS (EI) calculated for C<sub>15</sub>H<sub>20</sub>O<sub>3</sub> ([M]<sup>+</sup>): 248.1412. Found: 248.1417

#### (*E*)-2,2-diethyl-4-(3-methoxyphenyl)but-3-enoic acid (**1e**)

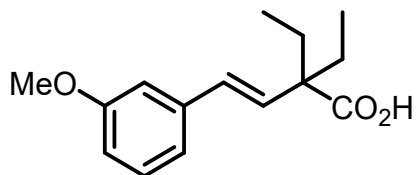

According to general procedure (Ia) with (*E*)-4-(3-methoxyphenyl)but-3-enoic acid (272 mg, 1.4 mmol). The crude product was purified by silica gel column chromatography (ethyl acetate/hexane) to provide **1e** as pale-yellow oil (246.6 mg, 71%). <sup>1</sup>H NMR (300 MHz, CDCl<sub>3</sub>) δ 7.29-7.15 (m, 1H), 7.00 (d, *J* = 6.0 Hz, 1H), 6.97-6.90 (m, 1H), 6.85-6.70 (m, 1H), 6.48-6.35 (m, 2H), 3.82 (s, 3H), 1.87 (q, *J* = 7.3 Hz, 4H), 0.90 (t, *J* = 7.3 Hz, 6H). <sup>13</sup>C NMR (75 MHz, CDCl<sub>3</sub>) δ 181.6, 159.8, 138.7, 131.3, 129.9, 129.5, 118.9, 113.1, 111.5, 55.2, 52.6, 28.7, 8.8. HRMS (EI) calculated for C<sub>15</sub>H<sub>20</sub>O<sub>3</sub> ([M]<sup>+</sup>): 248.1412. Found: 248.1407.

#### (*E*)-2,2-diethyl-4-(4-methoxyphenyl)but-3-enoic acid (**1f**)

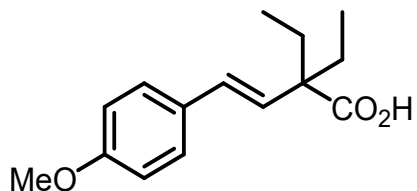

According to general procedure (Ia) with (*E*)-4-(4-methoxyphenyl)but-3-enoic acid (172 mg, 0.9 mmol). The crude product was purified by silica gel column chromatography (ethyl acetate/hexane) to provide **1f** as pale-yellow oil (149.6 mg, 67%). <sup>1</sup>H NMR (300 MHz, CDCl<sub>3</sub>) δ 7.33 (d, *J* = 9.0 Hz, 2H), 6.85 (d, *J* = 9.0 Hz, 2H), 6.42 (d, *J* = 18.0 Hz, 1H), 6.22 (d, *J* = 18.0 Hz, 1H), 3.81 (s, 3H), 1.86 (q, *J* = 7.3 Hz, 4H), 0.90 (t, *J* = 7.3 Hz, 6H). <sup>13</sup>C NMR (75 MHz, CDCl<sub>3</sub>) δ 181.9, 159.1, 130.0, 129.4, 128.8, 127.4, 113.9, 55.3, 52.5, 28.6, 8.8. HRMS (EI) calculated for C<sub>15</sub>H<sub>20</sub>O<sub>3</sub> ([M]<sup>+</sup>): 248.1412. Found: 248.1404.

**(*E*)-4-(4-chlorophenyl)-2,2-diethylbut-3-enoic acid (1g)**

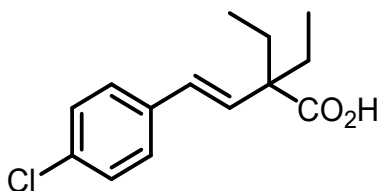

According to general procedure (Ia) with (*E*)-4-(4-chlorophenyl)but-3-enoic acid (197 mg, 1 mmol). The crude product was purified by silica gel column chromatography (ethyl acetate/hexane) to provide **1g** as pale-yellow solid, m.p.: 113-115 °C (129 mg, 51%): <sup>1</sup>H NMR (300 MHz, CDCl<sub>3</sub>) δ 7.44-7.20 (m, 4H), 6.39 (q, *J* = 14.0 Hz, 2H), 1.87 (q, *J* = 7.8 Hz, 4H), 0.90 (t, *J* = 7.8 Hz, 6H). <sup>13</sup>C NMR (75 MHz, CDCl<sub>3</sub>) δ 181.8, 135.7, 133.0, 131.7, 128.9, 128.6, 127.5, 52.7, 28.8, 8.8. HRMS (EI) calculated for C<sub>14</sub>H<sub>17</sub>ClO<sub>2</sub> ([M]<sup>+</sup>): 252.0917. Found: 252.0921.

**(*E*)-2,2-diethyl-4-(*p*-tolyl)but-3-enoic acid (1h)**

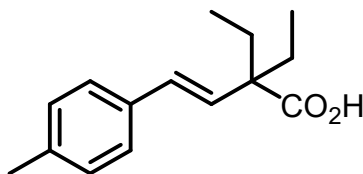

According to general procedure (Ia) with (*E*)-4-(*p*-tolyl)but-3-enoic acid (405 mg, 2.3 mmol). The crude product was purified by silica gel column chromatography (ethyl acetate/hexane) to provide **1h** as pale-yellow oil (277 mg, 52%). <sup>1</sup>H NMR (300 MHz, CDCl<sub>3</sub>) δ 7.30 (d, *J* = 6.0 Hz, 2H), 7.12 (d, *J* = 6.0 Hz, 2H), 6.45 (d, *J* = 16.5 Hz, 2H), 6.31 (d, *J* = 16.5 Hz, 2H), 2.34 (s, 3H), 1.87 (q, *J* = 7.0 Hz, 4H), 0.90 (t, *J* = 7.0 Hz, 6H). <sup>13</sup>C NMR (75 MHz, CDCl<sub>3</sub>) δ 181.8, 137.2, 134.4, 130.0, 129.8, 129.2, 126.2, 52.5, 28.7, 21.2, 8.8. HRMS (EI) calculated for C<sub>15</sub>H<sub>20</sub>O<sub>2</sub> ([M]<sup>+</sup>): 232.1463. Found: 232.1468.

**(E)-4-(4-cyanophenyl)-2,2-diethylbut-3-enoic acid (1i)**

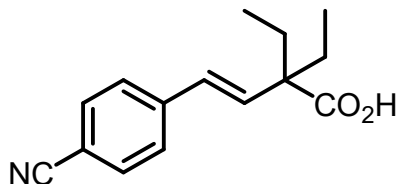

According to general procedure (1a) with (*E*)-4-(4-cyanophenyl)but-3-enoic acid (488 mg, 2.6 mmol). The crude product was purified by silica gel column chromatography (ethyl acetate/hexane) to provide **1i** as a yellow oil (129 mg, 33%). **<sup>1</sup>H NMR** (300 MHz, CDCl<sub>3</sub>) δ 7.60 (d, *J* = 9 Hz, 2H), 7.47 (d, *J* = 6 Hz, 2H), 6.55 (d, *J* = 18 Hz, 1H), 6.47 (d, *J* = 18 Hz, 1H), 1.88 (q, *J* = 9, 3 Hz, 4H), 0.90 (t, *J* = 6 Hz, 6H). **<sup>13</sup>C NMR** (75 MHz, CDCl<sub>3</sub>) δ 181.1, 141.6, 135.1, 132.3, 128.6, 126.7, 118.9, 110.6, 52.9, 29.0, 8.9. **HRMS** (EI) *m/z*: ([M]<sup>+</sup>) calcd for C<sub>15</sub>H<sub>17</sub>NO<sub>2</sub>: 243.1259. Found: 243.1253.

**(E)-2,2-diethyloct-3-enoic acid (1k)**

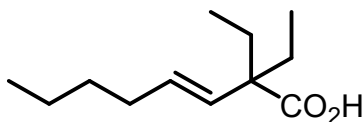

Compound **1k** were synthesized using a reported procedure<sup>2d</sup> with (*E*)-oct-3-enoic acid (170 mg, 1.2 mmol). The crude product was purified by silica gel column chromatography (ethyl acetate/hexane) to provide **1k** as yellow oil (170 mg, 86%). **<sup>1</sup>H NMR** (300 MHz, CDCl<sub>3</sub>) δ 5.60-5.45 (m, 2H), 2.15-2.00 (m, 2H), 1.80-1.65 (m, 4H), 1.43-1.25 (m, 4H), 0.95-0.75 (m, 9H). **<sup>13</sup>C NMR** (75 MHz, CDCl<sub>3</sub>) δ 182.6 131.1, 130.6, 52.0, 32.5, 31.5, 28.2, 22.1, 13.9, 8.6. **HRMS** (EI) *m/z*: ([M]<sup>+</sup>) calcd for C<sub>12</sub>H<sub>22</sub>O<sub>2</sub>: 198.1620. Found: 198.1611.

**Preparation of (*E*)-6-((tert-butyldimethylsilyloxy)-2,2-diethylhex-3-enoic acid (1l):**

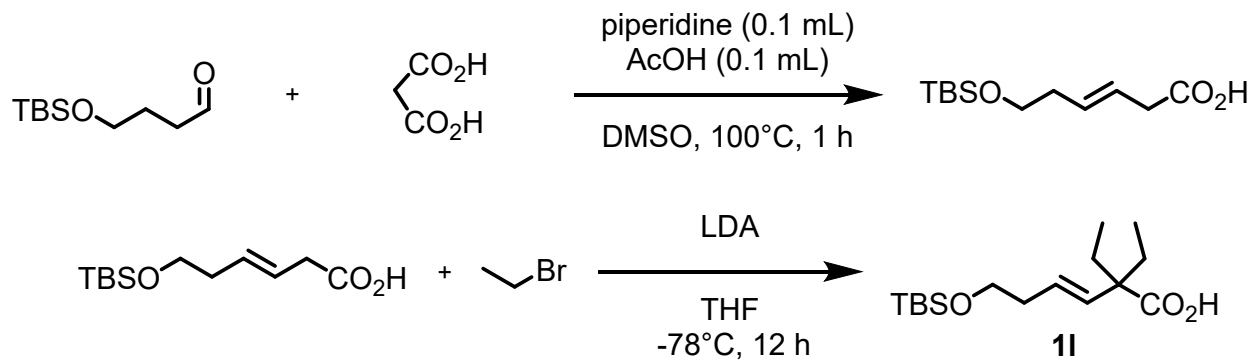

In a flame dried 100 mL round bottom flask with stir bar, 4-((tert-butyl dimethylsilyl)oxy)butanal (640 mg, 3.16 mmol), malonic acid (361.9 mg, 3.48 mmol), DMSO (3.5 mL) were added. Then 0.1 mL of piperidine and 0.1 mL of AcOH were added through syringe while stirring under room temperature. The reaction was then heated to 100 °C and stirred for 1 hour. Cool down the reaction to room temperature before quenching the reaction with water. Extract with diethyl ether three times. Collect the organic phase and dry with MgSO<sub>4</sub> and remove the solvent with rotary evaporator to afford crude 400 mg (yield = 52%). The product is put into next step without further purification.

In a flame dried 100 mL round bottom flask with stir bar, (*E*)-6-((tert-butyl dimethylsilyl)oxy)hex-3-enoic acid (1.7 g, 6.24 mmol) and dry THF (15 mL) were added. The reaction was cooled down to -78 °C before adding LDA (7.8 mL, 2M solution, 15.6 mmol) through syringe dropwise under argon. The reaction was then stirred for another 1 hour. Then dried bromoethane (2.04 g, 18.7 mmol) were added through syringe slowly, the reaction was stirred under room temperature overnight. Quench the reaction with HCl solution (10%), extract with Et<sub>2</sub>O three times, collect the organic phase and dry with MgSO<sub>4</sub>. Remove the solvent with rotary evaporator to afford crude. The crude product was put into flame dried round bottom flask and dry THF (15 mL) was added. The reaction was cooled down to -78 °C before adding LDA (7.8 mL, 2M solution, 15.6 mmol) through syringe dropwise under argon. The reaction was then stirred for another 1 hour. Then dried bromoethane (2.04 g, 18.7 mmol) were added through syringe slowly, the reaction was stirred under room temperature overnight. Quench the reaction with HCl solution (10%), extract with Et<sub>2</sub>O three times, collect the organic phase and dry with MgSO<sub>4</sub>. Remove the solvent with rotary evaporator to afford crude. Purify with flash column using Et<sub>2</sub>O/hexane = 2/3 as eluent to afford product **11** as yellow oil (250 mg, 14%). <sup>1</sup>H NMR (300 MHz, CDCl<sub>3</sub>) δ 5.64-5.48 (m, 2H), 3.66-3.62 (t, *J* = 6.0 Hz, 2H), 2.32-2.26 (q, *J* = 6.0 Hz, 2H), 1.76-1.69 (q, *J* = 6.0 Hz, 2H), 0.88-0.81

(singlet and triplet stacked, total 15H), 0.04 (s, 6H).  $^{13}\text{C}$  NMR (75 MHz,  $\text{CDCl}_3$ )  $\delta$  182.0, 132.7, 127.5, 63.0, 52.2, 36.5, 28.2, 25.9, 18.3, 8.7, -5.3. HRMS (EI)  $m/z$ : ( $[\text{M}]^+$ ) calcd for  $\text{C}_{16}\text{H}_{32}\text{O}_3\text{Si}$ : 300.2121. Found: 300.2115.

**(E)-4-(4-methoxyphenyl)-2-phenylbut-3-enoic acid (1m)**

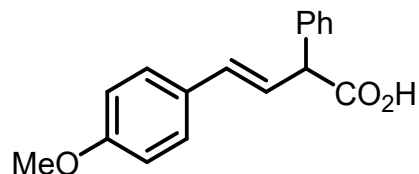

According to general procedure (Ib) with ethyl (*E*)-4-(4-methoxyphenyl)-2-phenylbut-3-enoate (266 mg, 0.89 mmol). The obtained compound was purified by column chromatography to isolate the pure product **1m** as white solid, m.p.: 95-96 °C (180 mg, 67%).  $^1\text{H}$  NMR (300 MHz,  $\text{CDCl}_3$ )  $\delta$  7.40-7.28 (m, 7H), 6.85 (d,  $J = 9$  Hz, 2H), 6.47 (d,  $J = 3$  Hz, 2H), 4.48 (d,  $J = 6$  Hz, 1H), 3.81 (s, 3H).  $^{13}\text{C}$  NMR (75 MHz,  $\text{CDCl}_3$ )  $\delta$  178.7, 159.3, 137.8, 132.4, 129.2, 128.7, 128.0, 127.6, 127.5, 124.0, 113.9, 55.2, 54.8. HRMS (EI) calculated for  $\text{C}_{17}\text{H}_{16}\text{O}_3$  ( $[\text{M}]^+$ ): 268.10927. Found: 268.1094.

**(E)-2,2-difluoro-4-(4-methoxyphenyl)but-3-enoic acid (1n)**

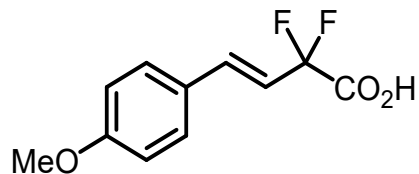

According to general procedure (Ib) with (*E*)-2,2-difluoro-4-(4-methoxyphenyl)but-3-enoate (76.6 mg, 0.299 mmol). The obtained compound was purified by column chromatography to isolate the pure product **1n** as pale-yellow oil (48.6 mg, 71%).  $^1\text{H}$  NMR (300 MHz,  $\text{CDCl}_3$ )  $\delta$  7.74 (d,  $J = 15.0$  Hz, 1H), 7.51 (d,  $J = 9.0$  Hz, 2H), 6.92 (d,  $J = 9.0$  Hz, 2H), 6.32 (d,  $J = 15.0$  Hz, 1H), 3.85 (s, 3H).  $^{13}\text{C}$  NMR (75 MHz,  $\text{CDCl}_3$ )  $\delta$  172.2, 161.7, 146.6, 130.0 (t,  $J_{\text{C}, \text{F}} = 6$  Hz), 126.7, 114.6, 114.3, 55.4. HRMS (EI) calculated for  $\text{C}_{11}\text{H}_{10}\text{F}_2\text{O}_3$  ( $[\text{M}]^+$ ): 228.0598. Found: 228.0592.

**(E)-1-(4-methoxystyryl)cyclobutane-1-carboxylic acid (1o)**



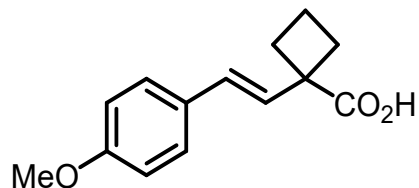

According to general procedure (Ib) with ethyl (*E*)-1-(4-methoxystyryl)cyclobutane-1-carboxylate (200 mg, 0.768 mmol). The product **1o** appears as pale-yellow oil and were used in next step without further purification (150 mg, 84%). <sup>1</sup>H NMR (300 MHz, CDCl<sub>3</sub>) δ 7.34 (d, *J* = 6.0 Hz, 2H), 6.86 (d, *J* = 9.0 Hz, 2H), 6.51 (d, *J* = 18.0 Hz, 1H), 6.34 (d, *J* = 15.0 Hz, 1H), 3.81 (s, 3H), 2.69-2.59 (m, 2H), 2.33-2.24 (m, 2H), 2.01-1.94 (m, 2H). <sup>13</sup>C NMR (75 MHz, CDCl<sub>3</sub>) δ 181.5, 159.1 129.5, 128.9, 128.3, 127.5, 113.9, 55.2, 49.6, 30.8, 15.9. HRMS (EI) calculated for C<sub>14</sub>H<sub>16</sub>O<sub>3</sub> ([M]<sup>+</sup>): 232.1099. Found: 232.1094.

**(3*Z*,5*E*)-2,2-diethyl-6-(4-methoxyphenyl)-4-phenylhexa-3,5-dienoic acid (3a)**

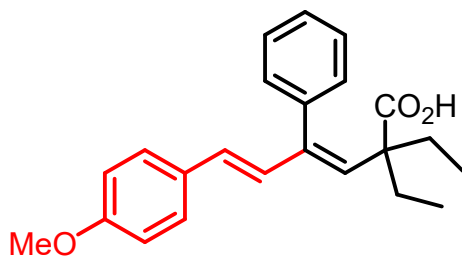

According to general procedure (II) with **1a** (0.137 mmol, 30.0 mg) and **2a** (0.11 mmol, 23.3 mg), the crude product was purified by column chromatography on silica gel (ethyl acetate/hexane) to provide **3a** as pale-yellow oil (36 mg, 93%). <sup>1</sup>H NMR (300 MHz, CDCl<sub>3</sub>) δ 7.38-7.30 (m, 3H), 7.25-7.20 (m, 2H), 7.18-7.12 (m, 2H), 6.94 (d, *J* = 15.0 Hz, 1H), 6.83-6.76 (m, 2H), 5.98 (s, 1H), 5.76 (d, *J* = 15.0 Hz, 1H), 3.78 (s, 3H), 1.62 (q, *J* = 7.3 Hz, 4H), 0.84 (t, *J* = 7.3 Hz, 6H). <sup>13</sup>C NMR (75 MHz, CDCl<sub>3</sub>) δ 181.8, 159.0, 142.2, 137.4, 133.7, 133.1, 130.1, 129.8, 129.4, 127.8, 127.5, 127.3, 113.9, 55.2, 52.3, 29.1, 8.8. HRMS (EI) calculated for C<sub>23</sub>H<sub>26</sub>O<sub>3</sub> ([M]<sup>+</sup>): 350.1882. Found: 350.1890.

**(3*Z*,5*E*)-2,2-diethyl-6-(3-methoxyphenyl)-4-phenylhexa-3,5-dienoic acid (3b)**

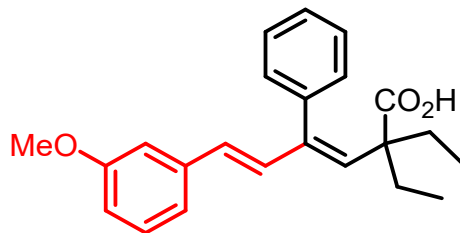

According to general procedure (II) with **1a** (0.206 mmol, 45.0 mg) and **2b** (0.165 mmol, 35.1 mg), the crude product was purified by column chromatography on silica gel (ethyl acetate/hexane) to provide **3b** as pale-yellow oil (49 mg, 85%). **<sup>1</sup>H NMR** (300 MHz, CDCl<sub>3</sub>) δ 7.40-7.32 (m, 3H), 7.22-7.13 (m, 3H), 7.04 (d, *J* = 15.0 Hz, 1H), 6.89 (d, *J* = 9.0 Hz, 1H), 6.84 (d, *J* = 3.0 Hz, 1H), 6.74 (dd, *J* = 9.0, 3.0 Hz, 1H), 6.06 (s, 1H), 5.80 (d, *J* = 15.0 Hz, 1H), 3.79 (s, 3H), 1.64 (q, *J* = 7.8 Hz, 4H), 0.85 (t, *J* = 7.8 Hz, 6H). **<sup>13</sup>C NMR** (75 MHz, CDCl<sub>3</sub>) δ 181.9, 159.7, 142.0, 138.7, 137.2, 135.4, 135.0, 130.2, 129.4, 129.3, 127.9, 127.4, 119.1, 113.4, 111.2, 55.2, 52.5, 29.2, 8.9. **HRMS** (EI) calculated for C<sub>23</sub>H<sub>26</sub>O<sub>3</sub> ([M]<sup>+</sup>): 350.1882. Found: 350.1886.

**(3Z,5E)-2,2-diethyl-6-(2-methoxyphenyl)-4-phenylhexa-3,5-dienoic acid (3c)**

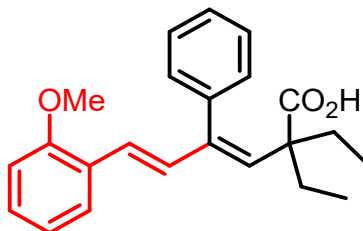

According to general procedure (II) with **1a** (0.206 mmol, 45.0 mg) and **2c** (0.165 mmol, 35.1 mg), the crude product was purified by column chromatography on silica gel (ethyl acetate/hexane) to provide **3c** as pale-yellow oil (41.7 mg, 72%). **<sup>1</sup>H NMR** (300 MHz, CDCl<sub>3</sub>) δ 7.44-7.28 (m, 4H), 7.25-7.04 (m, 4H), 6.90 (t, *J* = 7.5 Hz, 1H), 6.80 (d, *J* = 9.0 Hz, 1H), 6.15 (d, *J* = 15.0 Hz, 1H), 6.03 (s, 1H), 3.73 (s, 3H), 1.64 (q, *J* = 7.3 Hz, 4H), 0.84 (t, *J* = 7.3 Hz, 6H). **<sup>13</sup>C NMR** (75 MHz, CDCl<sub>3</sub>) δ 182.5, 156.7, 142.7, 137.3, 136.0, 134.3, 129.4, 128.2, 127.8, 127.2, 126.9, 126.3, 125.5, 120.5, 110.8, 55.4, 52.4, 29.1, 8.8. **HRMS** (EI) calculated for C<sub>23</sub>H<sub>26</sub>O<sub>3</sub> ([M]<sup>+</sup>): 350.1882. Found: 350.1877.

**(3Z,5E)-2,2-diethyl-4,6-diphenylhexa-3,5-dienoic acid (3d)**

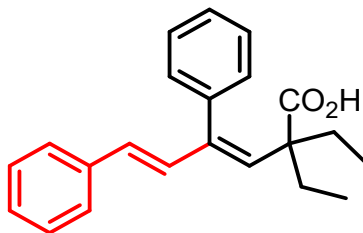

According to general procedure (II) with **1a** (0.115 mmol, 25.0 mg) and **2d** (0.092 mmol, 16.8 mg), the crude product was purified by column chromatography on silica gel (ethyl acetate/hexane) to provide **3d** as pale-yellow oil (27.1 mg, 92%). **<sup>1</sup>H NMR** (300 MHz, CDCl<sub>3</sub>) δ 4.2-7.26 (m, 7H), 7.20-7.12 (m, 3H), 7.06 (d, *J* = 15.8 Hz, 1H), 6.04 (s, 1H), 5.81 (d, *J* = 15.8 Hz, 1H), 1.66-1.59 (q, *J* = 7.5 Hz, 4H), 0.82 (t, *J* = 7.5 Hz, 6H). **<sup>13</sup>C NMR** (75 MHz, CDCl<sub>3</sub>) δ 181.4, 142.1, 137.3, 135.0, 134.8, 130.3, 129.4, 128.7, 128.5, 127.9, 127.4, 127.3, 126.4, 52.4, 29.2, 8.9. **HRMS** (EI) calculated for C<sub>22</sub>H<sub>24</sub>O<sub>2</sub> ([M]<sup>+</sup>): 320.1776. Found: 320.1777.

**(3Z,5E)-6-(4-chlorophenyl)-2,2-diethyl-4-phenylhexa-3,5-dienoic acid (3e)**

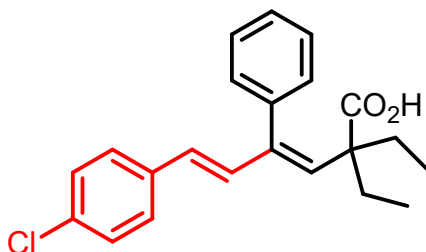

According to general procedure (II) with **1a** (0.206 mmol, 45.0 mg) and **2e** (0.165 mmol, 35.9 mg), the crude product was purified by column chromatography on silica gel (ethyl acetate/hexane) to provide **3e** as pale-yellow solid m.p.: 125-127 °C (44.5 mg, 76%). **<sup>1</sup>H NMR** (300 MHz, CDCl<sub>3</sub>) δ 7.37-7.32 (m, 3H), 7.26-7.21 (m, 4H), 7.19-7.12 (m, 2H), 7.02 (d, *J* = 15.0 Hz, 1H), 6.05 (s, 1H), 5.75 (d, *J* = 15.0 Hz, 1H), 1.63 (q, *J* = 7.3 Hz, 4H), 0.84 (t, *J* = 7.3 Hz, 6H). **<sup>13</sup>C NMR** (75 MHz, CDCl<sub>3</sub>) δ 180.8, 141.9, 137.0, 135.8, 135.7, 135.4, 132.8, 129.3, 129.0, 128.6, 127.9, 127.5, 127.5, 52.4, 29.2, 8.9. **HRMS** (EI) calculated for C<sub>22</sub>H<sub>23</sub>ClO<sub>2</sub> ([M]<sup>+</sup>): 354.1387. Found: 354.1382.

**(3Z,5E)-2,2-diethyl-6-(4-(methoxycarbonyl)phenyl)-4-phenylhexa-3,5-dienoic acid (3f)**

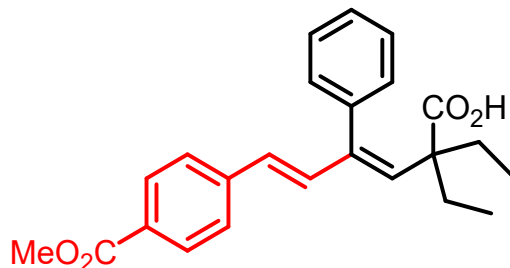

According to general procedure (II) with **1a** (0.206 mmol, 45.0 mg) and **2f** (0.165 mmol, 39.8 mg), the crude product was purified by column chromatography on silica gel (ethyl acetate/hexane) to provide **3f** as pale-yellow oil (49 mg, 78%). <sup>1</sup>H NMR (300 MHz, CDCl<sub>3</sub>) δ 7.92 (d, *J* = 9.0 Hz, 2H), 7.38-7.28 (m, 5H), 7.19-7.12 (m, 3H), 6.13 (s, 1H), 5.83 (d, *J* = 15.0 Hz, 1H), 3.89 (s, 3H), 1.62 (q, *J* = 7.3 Hz, 4H), 0.83 (t, *J* = 7.3 Hz, 6H). <sup>13</sup>C NMR (75 MHz, CDCl<sub>3</sub>) δ 181.7, 166.9, 141.9, 141.8, 137.5, 136.8, 136.6, 129.8, 129.3, 129.2, 128.5, 128.0, 127.5, 126.2, 52.6, 52.0, 29.2, 8.9. HRMS (EI) calculated for C<sub>24</sub>H<sub>26</sub>O<sub>4</sub> ([M]<sup>+</sup>): 378.1831. Found: 378.1836

**(3Z,5E)-2,2-diethyl-4-phenyl-6-(4-(trifluoromethyl)phenyl)hexa-3,5-dienoic acid (3g)**

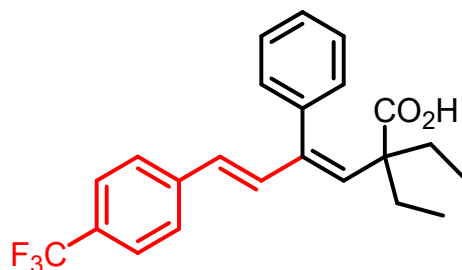

According to general procedure (II) with **1a** (0.151 mmol, 33.0 mg) and **2g** (0.121 mmol, 30.4mg), the crude product was purified by column chromatography on silica gel (ethyl acetate/hexane) to provide **3g** as pale-yellow solid m.p.: 117-119 °C (31 mg, 66%). <sup>1</sup>H NMR (300 MHz, CDCl<sub>3</sub>) δ 7.50 (d, *J* = 6.0 Hz, 2H), 7.43-7.30 (m, 5H), 7.22-7.08 (m, 3H), 6.12 (s, 1H), 5.83 (d, *J* = 15.0 Hz, 1H), 1.64 (q, *J* = 7.4 Hz, 4H), 0.85 (t, *J* = 7.4 Hz, 6H). <sup>13</sup>C NMR (75 MHz, CDCl<sub>3</sub>) δ 181.2, 141.8, 140.8, 137.4, 136.8, 136.6, 129.3, 129.1, 128.8, 128.0, 127.6, 126.4, 125.4, 125.4, 52.6, 29.2, 8.9. HRMS (EI) calculated for C<sub>23</sub>H<sub>23</sub>F<sub>3</sub>O<sub>2</sub> ([M]<sup>+</sup>): 388.1650. Found: 388.1657.

**(3Z,5E)-6-(4-(benzyloxy)phenyl)-2,2-diethyl-4-phenylhexa-3,5-dienoic acid (3h)**

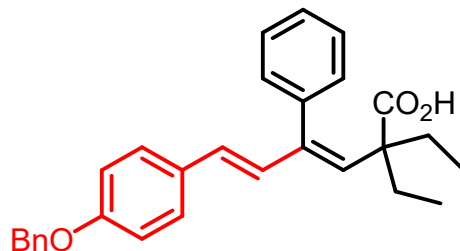

According to general procedure (II) with **1a** (0.161 mmol, 35.0 mg) and **2h** (0.128 mmol, 37.0 mg), the crude product was purified by column chromatography on silica gel (ethyl acetate/hexane) to provide **3h** as pale-yellow solid m.p.: 110-112 °C (30 mg, 55%). **<sup>1</sup>H NMR** (300 MHz, CDCl<sub>3</sub>) δ 7.46-7.28 (m, 7H), 7.23 (d, *J* = 9.0 Hz, 2H), 7.20-7.10 (m, 2H), 6.94 (d, *J* = 16.5 Hz, 1H), 6.87 (d, *J* = 9.0 Hz, 2H), 5.98 (s, 1H), 5.76 (d, *J* = 16.5 Hz, 1H), 5.04 (s, 2H), 1.63 (q, *J* = 7.4 Hz, 4H), 0.84 (t, *J* = 7.4 Hz, 6H). **<sup>13</sup>C NMR** (75 MHz, CDCl<sub>3</sub>) δ 181.6, 158.2, 142.2, 137.4, 136.9, 133.8, 133.2, 130.3, 129.8, 129.4, 128.5, 127.9, 127.8, 127.5, 127.4, 127.3, 114.9, 69.9, 52.3, 29.1, 8.8. **HRMS** (EI) calculated for C<sub>29</sub>H<sub>30</sub>O<sub>3</sub> ([M]<sup>+</sup>): 426.2195. Found: 426.2187.

**(3Z,5E)-2,2-diethyl-6-(furan-2-yl)-4-phenylhexa-3,5-dienoic acid (3i)**

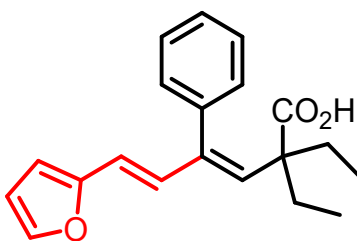

According to general procedure (II) with **1a** (0.137 mmol, 30.0 mg) and **2i** (0.11 mmol, 19.3 mg), the crude product was purified by column chromatography on silica gel (ethyl acetate/hexane) to provide **3i** as pale-yellow oil (21.1 mg, 62%). **<sup>1</sup>H NMR** (300 MHz, CDCl<sub>3</sub>) δ 7.40-7.28 (m, 4H), 7.15-7.10 (m, 2H), 7.00 (d, *J* = 16.5 Hz, 1H), 6.32 (d, *J* = 3.0 Hz, 1H), 6.09 (d, *J* = 3.0 Hz, 1H), 6.02 (s, 1H), 5.61 (d, *J* = 16.5 Hz, 1H), 1.62 (q, *J* = 7.3 Hz, 4H), 0.83 (t, *J* = 7.3 Hz, 6H). **<sup>13</sup>C NMR** (75 MHz, CDCl<sub>3</sub>) δ 181.8, 153.3, 141.9, 141.8, 136.9, 134.9, 133.6, 129.3, 127.9, 127.4, 118.2, 111.5, 108.3, 52.4, 29.1, 8.8. **HRMS** (EI) calculated for C<sub>20</sub>H<sub>22</sub>O<sub>3</sub> ([M]<sup>+</sup>): 310.1569. Found: 310.1563.

**(3Z,5E)-6-cyclohexyl-2,2-diethyl-4-phenylhexa-3,5-dienoic acid (3j)**

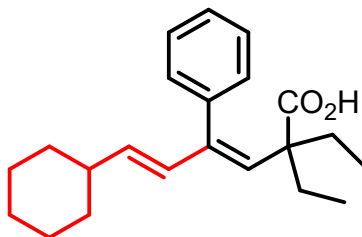

According to general procedure (II) with **1a** (0.161 mmol, 35.0 mg) and **2j** (0.128 mmol, 24.3 mg), the crude product was purified by column chromatography on silica gel (ethyl acetate/hexane) to provide **3j** as pale-yellow oil (22 mg, 52%). <sup>1</sup>H NMR (300 MHz, CDCl<sub>3</sub>) δ 7.35-7.23 (m, 3H), 7.14-7.00 (m, 2H), 6.25 (d, *J* = 18.0 Hz, 1H), 5.72 (s, 1H), 4.91 (q, *J* = 15.0, 9.0 Hz, 1H), 1.75-1.61 (m, 3H), 1.61-1.56 (m, 4H), 1.40-0.90 (m, 8H), 0.80 (t, *J* = 7.5 Hz, 6H). <sup>13</sup>C NMR (75 MHz, CDCl<sub>3</sub>) δ 180.6, 142.2, 138.6, 137.9, 133.5, 131.5, 129.3, 127.6, 127.0, 51.9, 40.7, 32.7, 28.9, 26.1, 26.0, 8.8. HRMS (EI) calculated for C<sub>22</sub>H<sub>30</sub>O<sub>2</sub> ([M]<sup>+</sup>): 326.2246. Found: 326.2245.

**(3Z,5E)-2-ethyl-6-(4-methoxyphenyl)-4-phenylhexa-3,5-dienoic acid (3k)**

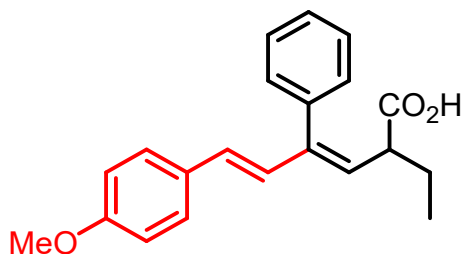

According to general procedure (II) with **1b** (0.137 mmol, 30.0 mg) and **2a** (0.11 mmol, 23.3 mg), the crude product was purified by column chromatography on silica gel (ethyl acetate/hexane) to provide **3k** as pale-yellow oil (21.3 mg, 60%). <sup>1</sup>H NMR (300 MHz, CDCl<sub>3</sub>) δ 7.50-7.30 (m, 3H), 7.27-7.15 (m, 4H), 6.91 (d, *J* = 15.0 Hz, 1H), 6.82 (d, *J* = 9.0 Hz, 2H), 6.00 (d, *J* = 15.0 Hz, 1H), 5.77 (d, *J* = 9.0 Hz, 1H), 3.79 (s, 3H), 3.05-2.90 (m, 1H), 1.82-1.71 (m, 1H), 1.64-1.54 (m, 1H), 0.85 (d, *J* = 7.5 Hz, 3H). <sup>13</sup>C NMR (75 MHz, CDCl<sub>3</sub>) δ 180.4, 159.1, 144.3, 137.3, 131.0, 130.4, 130.0, 129.5, 128.8, 128.3, 127.6, 127.3, 113.9, 55.2, 46.9, 26.0, 11.5. HRMS (EI) calculated for C<sub>21</sub>H<sub>22</sub>O<sub>3</sub> ([M]<sup>+</sup>): 322.1569. Found: 322.1561.

**(3Z,5E)-2,2-diethyl-4-(2-methoxyphenyl)-6-(4-methoxyphenyl)hexa-3,5-dienoic acid (3m)**

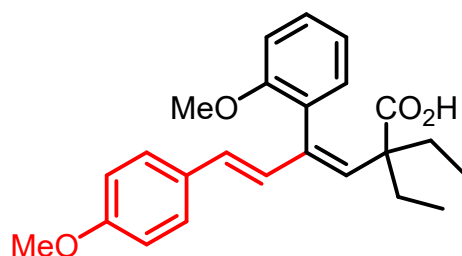

According to general procedure (II) with **1d** (0.20 mmol, 49.0 mg) and **2a** (0.16 mmol, 33.6 mg), the crude product was purified by column chromatography on silica gel (ethyl acetate/hexane) to provide **3m** as pale-yellow oil (41 mg, 67%). **<sup>1</sup>H NMR** (300 MHz, CDCl<sub>3</sub>) δ 7.38-7.27 (m, 1H), 7.23 (d, *J* = 9.0 Hz, 2H), 7.10-7.01 (m, 1H), 6.98-6.86 (m, 3H), 6.79 (d, *J* = 9.0 Hz, 2H), 6.04 (s, 1H), 5.77 (d, *J* = 15.0 Hz, 1H), 3.78 (s, 3H), 3.74 (s, 3H), 1.70-1.55 (m, 4H), 0.83 (t, *J* = 7.5 Hz, 6H). **<sup>13</sup>C NMR** (75 MHz, CDCl<sub>3</sub>) δ 181.6, 158.8, 156.9, 138.9, 134.3, 131.9, 131.0, 130.2, 129.0, 128.6, 127.6, 125.8, 120.0, 113.8, 110.3, 55.2, 55.0, 52.4, 28.6, 28.3, 8.8, 8.7. **HRMS** (EI) calculated for C<sub>24</sub>H<sub>28</sub>O<sub>4</sub> ([M]<sup>+</sup>): 380.1988. Found: 380.1985.

**(3Z,5E)-2,2-diethyl-4-(3-methoxyphenyl)-6-(4-methoxyphenyl)hexa-3,5-dienoic acid (3n)**

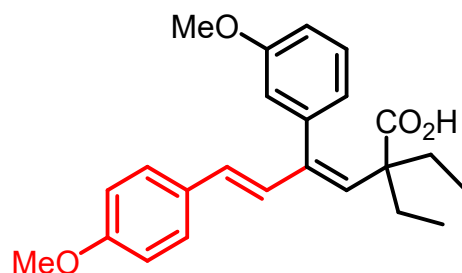

According to general procedure (II) with **1e** (0.20 mmol, 49.0 mg) and **2a** (0.16 mmol, 33.6 mg), the crude product was purified by column chromatography on silica gel (ethyl acetate/hexane) to provide **3n** as pale-yellow oil (53 mg, 88%). **<sup>1</sup>H NMR** (300 MHz, CDCl<sub>3</sub>) δ 7.30-7.20 (m, 3H), 6.96-6.69 (m, 6H), 5.96 (s, 1H), 5.82 (d, *J* = 16.5 Hz, 1H), 3.78 (s, 6H), 1.64 (q, *J* = 7.3 Hz, 4H), 0.83 (t, *J* = 7.3 Hz, 6H). **<sup>13</sup>C NMR** (75 MHz, CDCl<sub>3</sub>) δ 181.5, 159.0, 159.0, 142.1, 138.8, 133.3, 132.8, 130.1, 129.7, 128.9, 127.5, 121.8, 114.7, 113.9, 113.0, 55.2, 55.1, 52.4, 29.2, 8.9. **HRMS** (EI) calculated for C<sub>24</sub>H<sub>28</sub>O<sub>4</sub> ([M]<sup>+</sup>): 380.1988. Found: 380.1993.

**(3Z,5E)-2,2-diethyl-4,6-bis(4-methoxyphenyl)hexa-3,5-dienoic acid (3o)**

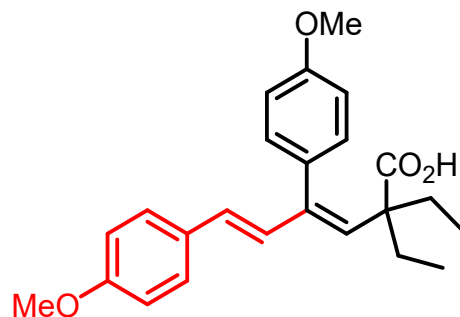

According to general procedure (II) with **1f** (0.16 mmol, 40.0 mg) and **2a** (0.13 mmol, 27.4 mg), the crude product was purified by column chromatography on silica gel (ethyl acetate/hexane) to provide **3o** as pale-yellow oil (45 mg, 91%). **<sup>1</sup>H NMR** (300 MHz, CDCl<sub>3</sub>) δ 7.25-7.20 (m, 2H), 7.06 (d, *J* = 9.0 Hz, 2H), 6.95-6.83 (m, 3H), 6.80 (d, *J* = 9.0 Hz, 2H), 5.96 (s, 1H), 5.79 (d, *J* = 15.0 Hz, 1H), 3.83 (s, 3H), 3.78 (s, 3H), 1.67-1.59 (q, *J* = 7.4 Hz, 4H), 0.83 (t, *J* = 7.4 Hz, 6H). **<sup>13</sup>C NMR** (75 MHz, CDCl<sub>3</sub>) δ 181.1, 159.0, 158.7, 142.0, 134.0, 133.4, 130.4, 130.2, 129.7, 129.5, 127.5, 113.9, 113.3, 55.2, 55.1, 52.3, 29.1, 8.8. **HRMS** (EI) calculated for C<sub>24</sub>H<sub>28</sub>O<sub>4</sub> ([M]<sup>+</sup>): 380.1988. Found: 380.1991.

**(3Z,5E)-4-(4-chlorophenyl)-2,2-diethyl-6-(4-methoxyphenyl)hexa-3,5-dienoic acid (3p)**

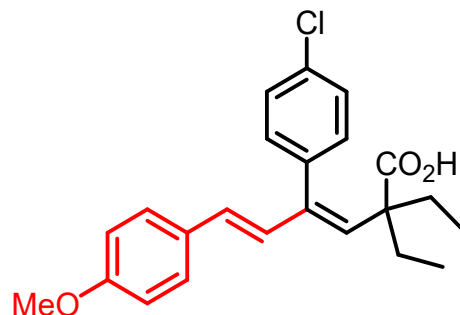

According to general procedure (II) with **1g** (0.15 mmol, 39.0 mg) and **2a** (0.12 mmol, 26.3 mg), the crude product was purified by column chromatography on silica gel (ethyl acetate/hexane) to provide **3p** as pale-yellow oil (27 mg, 59%). **<sup>1</sup>H NMR** (300 MHz, CDCl<sub>3</sub>) δ 7.32 (d, *J* = 9.0 Hz, 2H), 7.23 (d, *J* = 9.0 Hz, 2H), 7.10 (d, *J* = 6.0 Hz, 2H), 6.89 (d, *J* = 16.5 Hz, 1H), 6.81 (d, *J* = 9.0 Hz, 2H), 5.97 (s, 1H), 5.73 (d, *J* = 16.5 Hz, 1H), 3.79 (s, 3H), 1.64 (q, *J* = 7.4 Hz, 4H), 0.84 (t, *J* = 7.4 Hz, 6H). **<sup>13</sup>C NMR** (75 MHz, CDCl<sub>3</sub>) δ 181.4, 159.1, 141.1, 135.8, 134.3, 133.3, 132.7, 130.9, 130.0, 129.8, 128.2, 127.6, 114.0, 55.3, 52.2, 29.1, 8.8. **HRMS** (EI) calculated for C<sub>23</sub>H<sub>25</sub>ClO<sub>3</sub> ([M]<sup>+</sup>): 384.1492. Found: 384.1501.



**(3Z,5E)-2,2-diethyl-6-(4-methoxyphenyl)-4-(p-tolyl)hexa-3,5-dienoic acid (3q)**

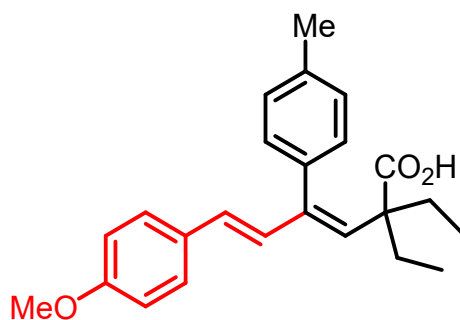

According to general procedure (II) with **1h** (0.25 mmol, 58.1 mg) and **2a** (0.20 mmol, 42.8 mg), the crude product was purified by column chromatography on silica gel (ethyl acetate/hexane) to provide **3q** as pale-yellow oil (68.5 mg, 94%). **<sup>1</sup>H NMR** (300 MHz, CDCl<sub>3</sub>) δ 7.24 (d, *J* = 9.0 Hz, 2H), 7.15 (d, *J* = 9.0 Hz, 2H), 7.05 (d, *J* = 9.0 Hz, 2H), 6.95 (d, *J* = 15.0 Hz, 1H), 6.81 (d, *J* = 9.0 Hz, 2H), 5.98 (s, 1H), 5.81 (d, *J* = 15.0 Hz, 1H), 3.79 (s, 3H), 2.38 (s, 3H), 1.70-1.60 (m, 4H), 0.85 (t, *J* = 6.0 Hz, 6H). **<sup>13</sup>C NMR** (75 MHz, CDCl<sub>3</sub>) δ 182.3, 158.9, 142.3, 136.8, 134.3, 133.7, 133.2, 130.2, 129.6, 129.2, 128.5, 127.5, 113.9, 55.2, 52.3, 29.1, 21.3, 8.8. **HRMS** (EI) calculated for C<sub>24</sub>H<sub>28</sub>O<sub>3</sub> ([M]<sup>+</sup>): 364.2038. Found: 364.2034.

**(3Z,5E)-6-(4-methoxyphenyl)-2,2-dimethyl-4-phenylhexa-3,5-dienoic acid (3s)**

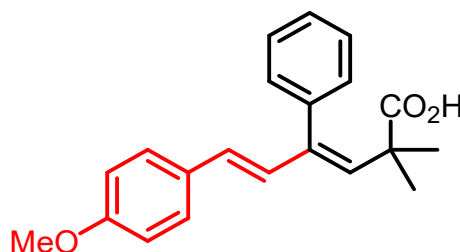

According to general procedure (II) with **1j** (0.25 mmol, 47.6 mg) and **2a** (0.2 mmol, 42.6 mg) The crude product was purified by column chromatography on silica gel (ethyl acetate/hexane) provide pure product **3s** as pale-yellow oil (26.4 mg, 41%). **<sup>1</sup>H NMR** (300 MHz, CDCl<sub>3</sub>) δ 7.35-7.14 (m, 7H), 6.89-6.78 (m, 3H), 5.89 (s, 1H), 5.81 (d, *J* = 16.5 Hz, 1H), 3.78 (s, 3H), 1.23 (s, 6H). **<sup>13</sup>C NMR** (75 MHz, CDCl<sub>3</sub>) δ 183.0, 159.0, 142.0, 137.0, 136.0, 132.4, 130.4, 130.0, 129.1, 127.8, 127.5, 127.2, 113.9, 55.2, 43.8, 27.1. **HRMS** (EI) calculated for C<sub>21</sub>H<sub>22</sub>O<sub>3</sub> ([M]<sup>+</sup>): 322.1569. Found: 322.1559.

**(3E,5E)-2,2-difluoro-4-(4-methoxyphenyl)-6-phenylhexa-3,5-dienoic acid (3t)**

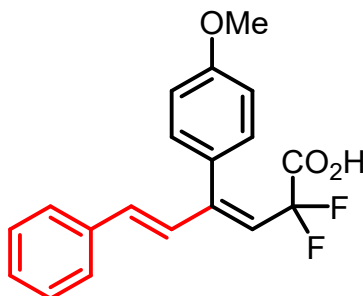

According to general procedure (II) with **1m** (57.2 mg, 0.25 mmol) and **2d** (36.7 mg, 0.2 mmol), the crude was purified by column chromatography on silica gel (ethyl acetate/hexane) to provide **3t** as yellow oil (24.2 mg, 29%). **<sup>1</sup>H NMR** (300 MHz, CDCl<sub>3</sub>) δ 7.40-7.28 (m, 5H), 7.15 (d, *J* = 9.0 Hz, 2H), 7.04 (d, *J* = 16.5 Hz, 1H), 6.95 (d, *J* = 9.0 Hz, 2H), 6.44 (d, *J* = 16.5 Hz, 1H), 6.05 (s, 1H), 3.87 (s, 3H). **<sup>13</sup>C NMR** (75 MHz, CDCl<sub>3</sub>) δ 170.1, 159.4, 156.7, 139.2, 136.0, 131.6, 129.9 (t, *J*<sub>C,F</sub> = 9 Hz), 128.9, 128.7, 128.2, 127.2, 118.6, 113.6, 113.4, 55.2. **HRMS** (EI) calculated for C<sub>19</sub>H<sub>16</sub>F<sub>2</sub>O<sub>3</sub> ([M]<sup>+</sup>): 330.1068. Found: 330.1061.

**1-((1E,3E)-2-(4-methoxyphenyl)-4-phenylbuta-1,3-dien-1-yl)cyclobutane-1-carboxylic acid (3u)**

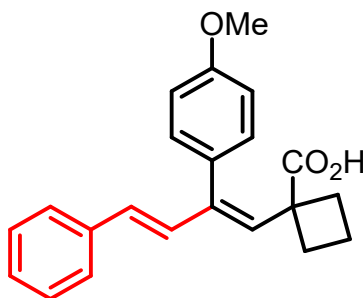

According to general procedure (II) with **1n** (50 mg, 0.215 mmol) and **2d** (31.5 mg, 0.172 mmol), the crude was purified by column chromatography on silica gel (ethyl acetate/hexane) to provide **3u** as pale-yellow oil (32 mg, 55%). **<sup>1</sup>H NMR** (300 MHz, CDCl<sub>3</sub>) δ 7.36-7.22 (m, 7H), 7.11 (d, *J* = 18.0 Hz, 1H), 6.89 (d, *J* = 9.0 Hz, 2H), 6.37 (d, *J* = 18.0 Hz, 1H), 5.74 (s, 1H), 3.85 (s, 3H), 2.88-2.79 (m, 2H), 2.46-2.36 (m, 2H), 2.07-1.97 (m, 2H). **<sup>13</sup>C NMR** (75 MHz, CDCl<sub>3</sub>) δ 180.8, 158.9, 141.3, 137.2, 134.0, 133.3, 133.2, 130.1, 128.6, 127.7, 126.6, 125.6, 113.4, 55.2, 48.6, 33.9, 29.6, 16.8. **HRMS** (EI) calculated for C<sub>22</sub>H<sub>22</sub>O<sub>3</sub> ([M]<sup>+</sup>): 334.1569. Found: 334.1564.

**(E)-2,2-diethyl-4-((E)-4-methoxystyryl)oct-3-enoic acid (3v)**

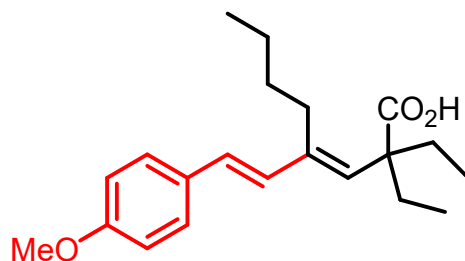

According to general procedure (II) with **1k** (0.129 mmol, 25.6 mg) and **2a** (0.103 mmol, 22.0 mg), the crude product was purified by column chromatography on silica gel (ethyl acetate/hexane) to provide **3v** as yellow oil (25.2 mg, 77%). <sup>1</sup>H NMR (300 MHz, CDCl<sub>3</sub>) δ 7.34 (d, *J* = 9 Hz, 2H), 6.86 (d, *J* = 9 Hz, 2H), 6.57 (d, *J* = 15 Hz, 1H), 6.44 (d, *J* = 15 Hz, 1H), 5.49 (s, 1H), 3.81 (s, 3H), 2.35-2.20 (m, 2H), 1.96-1.75 (m, 4H), 1.48-1.30 (m, 4H), 0.99-0.80 (m, 9H). <sup>13</sup>C NMR (75 MHz, CDCl<sub>3</sub>) δ 181.9, 158.9, 141.1, 133.4, 131.0, 130.4, 127.4, 126.5, 114.0, 55.3, 51.0, 30.3, 28.7, 28.0, 23.4, 13.9, 8.5. HRMS (EI) calcd for C<sub>21</sub>H<sub>30</sub>O<sub>3</sub> ([M]<sup>+</sup>): 330.2195. Found: 330.2187.

**(E)-4-((E)-2-cyclohexylvinyl)-2,2-diethyloct-3-enoic acid (3w)**

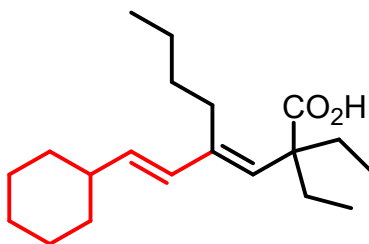

According to general procedure (II) with **1k** (0.14 mmol, 27.7 mg) and **2j** (0.11 mmol, 20.7 mg), the crude product was purified by column chromatography on silica gel (ethyl acetate/hexane) to provide **3w** as yellow oil (27.3 mg, 81%). <sup>1</sup>H NMR (300 MHz, CDCl<sub>3</sub>) δ 5.86 (d, *J* = 15 Hz, 1H), 5.55 (dd, *J* = 15, 6 Hz, 1H), 5.25 (s, 1H), 2.13 (t, *J* = 7.5 Hz, 1H), 1.92-1.65 (m, 8H), 1.37-1.23 (m, 11H), 0.88 (t, *J* = 7.5 Hz, 3H), 0.81 (t, *J* = 7.5 Hz, 1H). <sup>13</sup>C NMR (75 MHz, CDCl<sub>3</sub>) δ 182.4, 141.1, 134.9, 131.1, 130.8, 50.6, 41.0, 33.0, 30.2, 28.5, 28.0, 26.2, 26.1, 23.3, 13.9, 8.5. HRMS (EI) calcd for C<sub>20</sub>H<sub>34</sub>O<sub>2</sub> ([M]<sup>+</sup>): 306.2553. Found: 306.2549.

**(3E,5E)-4-butyl-2,2-diethylundeca-3,5-dienoic acid (3x)**

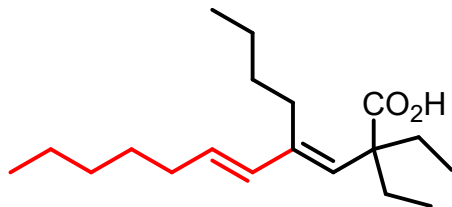

According to general procedure (III) with **1k** (0.14 mmol, 27.8 mg) and **2n** (0.12 mmol, 21.2 mg), the crude product was purified by column chromatography on silica gel (ethyl acetate/hexane) to provide **3x** as yellow oil (27.5 mg, 78%). **<sup>1</sup>H NMR** (300 MHz, CDCl<sub>3</sub>) δ 5.90 (d, *J* = 15 Hz, 1H), 5.68-5.51(m, 1H), 5.25 (s, 1H), 2.20-2.09 (m, 2H), 2.06 (t, *J* = 7.5 Hz, 1H), 1.90-1.70 (m, 4H), 1.41-1.21 (m, 8H), 0.89 (t, *J* = 7.5 Hz, 6H), 0.82 (t, *J* = 7.5 Hz, 6H). **<sup>13</sup>C NMR** (75 MHz, CDCl<sub>3</sub>) δ 182.3, 141.0, 133.4, 131.0, 129.3, 50.7, 32.9, 31.5, 30.2, 29.2, 28.6, 28.1, 23.3, 22.5, 14.1, 13.9, 8.5. **HRMS** (EI) calcd for C<sub>19</sub>H<sub>34</sub>O<sub>2</sub> ([M]<sup>+</sup>): 294.2553. Found: 294.2549.

**(E)-6-((tert-butyl dimethylsilyloxy)hex-3-enoic acid (3y)**

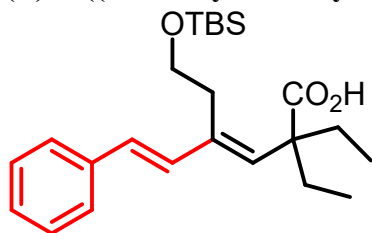

According to general procedure (III) with **1l** (0.19 mmol, 60 mg) and **2d** (0.15 mmol, 27.8 mg), the crude product was purified by column chromatography on silica gel (ethyl acetate/hexane) to provide **3y** as yellow oil (20 mg, 42%). **<sup>1</sup>H NMR** (300 MHz, CDCl<sub>3</sub>) δ 7.42-7.21 (m, 5H), 6.72 (d, *J* = 18.0 Hz, 1H), 6.58 (d, *J* = 18.0 Hz, 1H), 5.71 (s, 1H), 3.75-3.70 (t, *J* = 6.0 Hz, 2H), 2.66-2.61 (t, *J* = 6.0 Hz, 2H), 1.99-1.84 (m, 4H), 0.90-0.84 (singlet and triplet stacked, total 15H), 0.07 (s, 6H). **<sup>13</sup>C NMR** (75 MHz, CDCl<sub>3</sub>) δ 181.5, 137.4, 137.0, 136.2, 133.0, 128.6, 127.1, 126.2, 61.6, 51.5, 31.9, 29.3, 26.0, 13.4, 8.7, -5.2. **HRMS** (EI) calcd for C<sub>24</sub>H<sub>38</sub>O<sub>3</sub>Si ([M]<sup>+</sup>): 402.2590. Found: 402.2585.

**(E)-3,3-diethyl-5-phenyl-4-styryldihydrofuran-2(3H)-one (5a)**

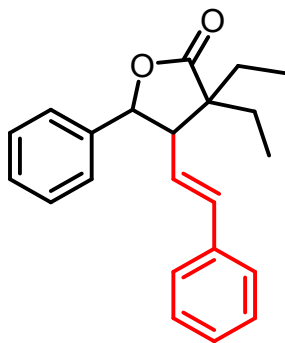

According to general procedure (III) with **1a** (0.21 mmol, 45.8 mg) and **4a** (0.17 mmol, 30.7 mg), the crude product was purified by column chromatography on silica gel (ethyl acetate/hexane) to provide **5a** as white solid m.p.:120-122 °C (47.9 mg, 88%). Compound **5a** dissolves in 6 mL of EA. A few block shaped, colorless crystals of Compound **5a** suitable for X-ray diffraction were obtained after 1 days at room temperature (25 °C), forming just above the solvent line. **<sup>1</sup>H NMR** (300 MHz, CDCl<sub>3</sub>) δ 7.40-7.23 (m, 10H), 6.38-6.16 (m, 2H), 5.26 (d, *J* = 9.0 Hz, 1H), 3.18-3.05 (m, 1H), 1.96-1.80 (m, 2H), 1.68-1.53 (m, 2H), 1.10 (t, *J* = 7.5 Hz, 3H), 0.99 (t, *J* = 7.5 Hz, 3H). **<sup>13</sup>C NMR** (75 MHz, CDCl<sub>3</sub>) δ 179.0, 138.3, 136.3, 135.6, 128.6, 128.5, 128.4, 128.0, 126.3, 125.8, 122.6, 81.6, 55.8, 52.6, 26.5, 25.5, 8.9, 8.6. **HRMS** (EI) calculated for C<sub>22</sub>H<sub>24</sub>O<sub>2</sub> ([M]<sup>+</sup>): 320.1776. Found: 320.1775.

**(E)-3,3-diethyl-4-(3-methylstyryl)-5-phenyldihydrofuran-2(3H)-one (5b)**

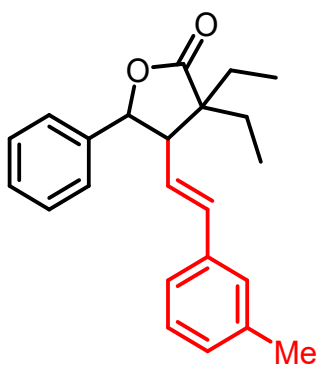

According to general procedure (III) with **1a** (0.26 mmol, 58.5 mg) and **4b** (0.21 mmol, 42.3 mg), the crude product was purified by column chromatography on silica gel (ethyl acetate/hexane) to provide **5b** as pale-yellow oil (54.1 mg, 77%). **<sup>1</sup>H NMR** (300 MHz, CDCl<sub>3</sub>) δ 7.38-7.05 (m, 9H), 6.35-6.15 (m, 2H), 5.26 (d, *J* = 9.0 Hz, 1H), 3.11 (dd, *J* = 9.0, 6.0 Hz, 1H), 2.36 (s, 3H), 1.95-1.83 (m, 2H), 1.75-1.55 (m, 2H), 1.10 (t, *J* = 7.5 Hz, 3H), 0.99 (t, *J* = 7.5 Hz, 3H). **<sup>13</sup>C NMR** (75 MHz,

$\text{CDCl}_3$ )  $\delta$  179.0, 138.3, 138.3, 136.3, 135.7, 128.8, 128.5, 128.5, 128.3, 127.0, 125.8, 123.5, 122.4, 81.6, 55.8, 52.5, 26.5, 25.5, 21.3, 8.9, 8.6. **HRMS** (EI) calculated for  $\text{C}_{23}\text{H}_{26}\text{O}_2$  ( $[\text{M}]^+$ ): 334.1933. Found: 334.1939.

**(E)-3,3-diethyl-4-(4-methylstyryl)-5-phenyldihydrofuran-2(3H)-one (5c)**

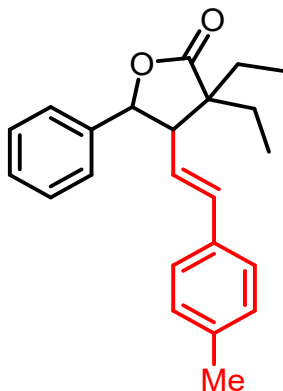

According to general procedure (III) with **1a** (0.21 mmol, 45.0 mg) and **4c** (0.16 mmol, 32.5 mg), the crude product was purified by column chromatography on silica gel (ethyl acetate/hexane) to provide **5c** as pale-yellow oil (44.4 mg, 83%).  **$^1\text{H}$  NMR** (300 MHz,  $\text{CDCl}_3$ )  $\delta$  7.40-7.28 (m, 5H), 7.25 (d,  $J = 9.0$  Hz, 2H), 7.14 (d,  $J = 6.0$  Hz, 2H), 6.35-6.15 (m, 2H), 5.25 (d,  $J = 9.0$  Hz, 1H), 3.10 (dd,  $J = 10.5, 7.5$  Hz, 1H), 2.35 (s, 3H), 1.98-1.80 (m, 2H), 1.74-1.57 (m, 2H), 1.10 (t,  $J = 7.5$  Hz, 3H), 0.99 (t,  $J = 7.5$  Hz, 3H).  **$^{13}\text{C}$  NMR** (75 MHz,  $\text{CDCl}_3$ )  $\delta$  179.0, 138.3, 137.9, 135.5, 133.6, 129.3, 128.5, 128.3, 126.2, 125.7, 121.5, 81.6, 55.8, 52.5, 26.5, 25.5, 21.2, 8.9, 8.6. **HRMS** (EI) calculated for  $\text{C}_{23}\text{H}_{26}\text{O}_2$  ( $[\text{M}]^+$ ): 334.1933. Found: 334.1932

**(E)-3,3-diethyl-4-(4-methoxystyryl)-5-phenyldihydrofuran-2(3H)-one (5d)**

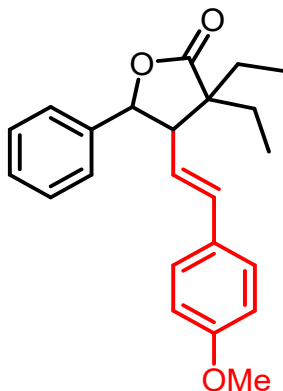

According to general procedure (III) with **1a** (0.24 mmol, 52.6 mg) and **4d** (0.19 mmol, 41.1 mg),

the crude product was purified by column chromatography on silica gel (ethyl acetate/hexane) to provide **5d** as pale-yellow oil (29.3 mg, 44%). <sup>1</sup>H NMR (300 MHz, CDCl<sub>3</sub>) δ 7.40-7.27 (m, 7H), 6.86 (d, *J* = 9.0 Hz, 2H), 6.23 (d, *J* = 15.0 Hz, 1H), 6.07 (dd, *J* = 15.0, 9.0 Hz, 1H), 5.24 (d, *J* = 9.0 Hz, 1H), 3.81 (s, 3H), 3.12-3.03 (m, 1H), 1.95-1.80 (m, 2H), 1.78-1.50 (m, 2H), 1.09 (t, *J* = 7.5 Hz, 3H), 0.98 (t, *J* = 7.5 Hz, 3H). <sup>13</sup>C NMR (75 MHz, CDCl<sub>3</sub>) δ 179.1, 159.5, 138.4, 135.0, 129.2, 128.5, 128.3, 127.5, 125.8, 120.3, 114.0, 81.7, 55.8, 55.3, 52.5, 26.5, 25.5, 8.9, 8.6. HRMS (EI) calculated for C<sub>23</sub>H<sub>26</sub>O<sub>3</sub> ([M]<sup>+</sup>): 350.1882. Found: 350.1884

**Methyl (*E*)-4-(2-(4,4-diethyl-5-oxo-2-phenyltetrahydrofuran-3-yl)vinyl)benzoate (**5e**)**

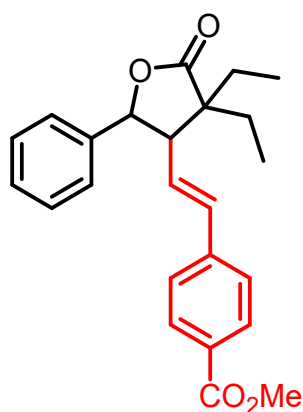

According to general procedure (III) with **1a** (0.20 mmol, 44.0 mg) and **4e** (0.16 mmol, 38.9 mg), the crude product was purified by column chromatography on silica gel (ethyl acetate/hexane) to provide **5e** as pale-yellow oil (40.5 mg, 67%). <sup>1</sup>H NMR (300 MHz, CDCl<sub>3</sub>) δ 7.98 (d, *J* = 9.0 Hz, 2H), 7.43-7.28 (m, 7H), 6.39-6.30 (m, 2H), 5.26 (d, *J* = 9.0 Hz, 1H), 3.91 (s, 3H), 3.20-3.10 (m, 1H), 1.98-1.83 (m, 2H), 1.78-1.53 (m, 2H), 1.10 (t, *J* = 7.5 Hz, 3H), 1.00 (d, *J* = 7.5 Hz, 3H). <sup>13</sup>C NMR (75 MHz, CDCl<sub>3</sub>) δ 178.7, 166.7, 140.6, 138.1, 134.8, 130.0, 129.4, 128.6, 128.5, 126.2, 125.8, 125.5, 81.5, 55.8, 52.7, 52.2, 26.5, 25.5, 8.9, 8.7. HRMS (EI) calculated for C<sub>24</sub>H<sub>26</sub>O<sub>4</sub> ([M]<sup>+</sup>): 378.1831. Found: 378.1828.

**(*E*)-3,3-diethyl-4-(4-nitrostyryl)-5-phenyldihydrofuran-2(3H)-one (**5f**)**

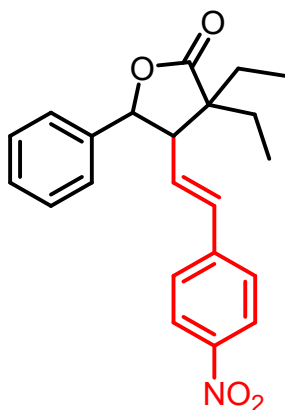

According to general procedure (III) with **1a** (0.23 mmol, 50.4 mg) and **4f** (0.18 mmol, 42.0 mg), the crude product was purified by column chromatography on silica gel (ethyl acetate/hexane) to provide **5f** as yellow oil (42.3 mg, 66%). **<sup>1</sup>H NMR** (300 MHz, CDCl<sub>3</sub>) δ 8.09 (d, *J* = 7.5 Hz, 2H), 7.37 (d, *J* = 7.5 Hz, 2H), 7.28-7.13 (m, 5H), 6.43-6.19 (m, 2H), 5.19 (d, *J* = 9.0 Hz, 1H), 3.15-3.00 (m, 3H), 1.88-1.75 (m, 2H), 1.66-1.46 (m, 2H), 1.01 (t, *J* = 7.5 Hz, 3H), 0.91 (t, *J* = 7.5 Hz, 3H). **<sup>13</sup>C NMR** (75 MHz, CDCl<sub>3</sub>) δ 178.4, 147.1, 142.4, 137.8, 133.6, 128.7, 127.9, 127.0, 126.9, 125.8, 124.1, 81.3, 55.9, 52.8, 26.5, 25.5, 8.9, 8.7. **HRMS** (EI) calculated for C<sub>22</sub>H<sub>23</sub>NO<sub>4</sub> ([M]<sup>+</sup>): 365.1627. Found: 365.1621.

**(E)-4-(4-bromostyryl)-3,3-diethyl-5-phenyldihydrofuran-2(3H)-one (5g)**

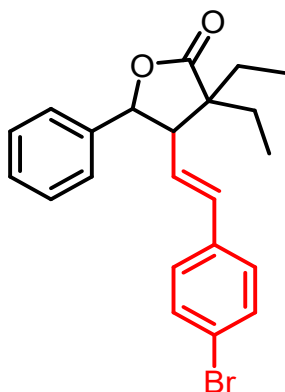

According to general procedure (III) with **1a** (0.20 mmol, 43.0 mg) and **4g** (0.16 mmol, 41.3 mg), the crude product was purified by column chromatography on silica gel (ethyl acetate/hexane) to provide **5g** as pale-yellow oil (53.7 mg, 84%). **<sup>1</sup>H NMR** (300 MHz, CDCl<sub>3</sub>) δ 7.43 (d, *J* = 9.0 Hz, 2H), 7.37-7.27 (m, 5H), 7.23-7.16 (m, 2H), 6.23 (d, *J* = 3.0 Hz, 2H), 5.24 (d, *J* = 12.0 Hz, 1H), 3.17-3.06 (m, 1H), 1.94-1.82 (m, 2H), 1.68-1.59 (m, 2H), 1.15-1.03 (m, 3H), 0.98 (t, *J* = 7.5 Hz, 3H). **<sup>13</sup>C NMR** (75 MHz, CDCl<sub>3</sub>) δ 178.8, 138.1, 135.2, 134.5, 131.7, 128.6, 128.5, 127.8, 125.8,



123.5, 121.8, 81.5, 55.8, 52.5, 26.5, 25.5, 8.9, 8.6. **HRMS** (EI) calculated for  $C_{22}H_{23}BrO_2$  ( $[M]^+$ ): 398.0881. Found: 398.0885.

**(E)-4-(4-chlorostyryl)-3,3-diethyl-5-phenyldihydrofuran-2(3H)-one (5h)**

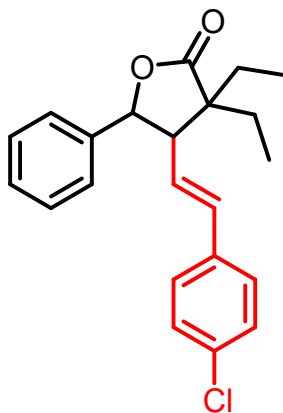

According to general procedure (III) with **1a** (0.20 mmol, 43.3 mg) and **4h** (0.16 mmol, 34.6 mg), the crude product was purified by column chromatography on silica gel (ethyl acetate/hexane) to provide **5h** as pale-yellow oil (43.7 mg, 77%). **<sup>1</sup>H NMR** (300 MHz,  $CDCl_3$ )  $\delta$  7.38-7.21 (m, 9H), 6.30-6.13 (m, 2H), 5.25 (d,  $J = 9.0$  Hz, 1H), 3.18-3.03 (m, 1H), 1.95-1.83 (m, 2H), 1.73-1.53 (m, 2H), 1.09 (t,  $J = 7.5$  Hz, 3H), 0.99 (t,  $J = 7.5$  Hz, 3H). **<sup>13</sup>C NMR** (75 MHz,  $CDCl_3$ )  $\delta$  178.8, 138.1, 134.7, 134.4, 133.6, 128.8, 128.5, 128.4, 127.5, 125.8, 123.4, 81.5, 55.7, 52.5, 26.5, 25.4, 8.9, 8.6. **HRMS** (EI) calculated for  $C_{22}H_{23}ClO_2$  ( $[M]^+$ ): 354.1387. Found: 354.1394.

**(E)-3,3-diethyl-4-(2-(naphthalen-1-yl)vinyl)-5-phenyldihydrofuran-2(3H)-one (5i)**

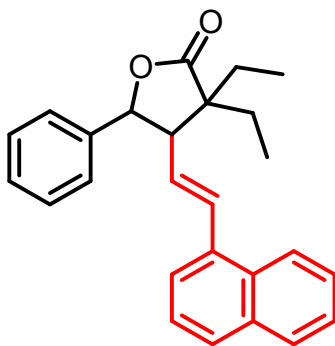

According to general procedure (III) with **1a** (0.41 mmol, 90.0 mg) and **4i** (0.33 mmol, 77.0 mg), the crude product was purified by column chromatography on silica gel (ethyl acetate/hexane) to provide **5i** as pale-yellow oil (80.7 mg, 66%). **<sup>1</sup>H NMR** (300 MHz,  $CDCl_3$ )  $\delta$  8.20 (d,  $J = 9.0$  Hz, 1H), 8.02 (br, 1H), 7.73 (d,  $J = 9.0$  Hz, 1H), 7.63-7.53 (m, 2H), 7.43-7.33 (m, 7H), 6.60-6.35 (m,

2H), 5.32 (d,  $J = 12.0$  Hz, 1H), 3.25-3.15 (m, 1H), 1.98-1.90 (m, 2H), 1.78-1.58 (m, 2H), 1.13 (t,  $J = 7.5$  Hz, 3H), 1.02 (t,  $J = 7.5$  Hz, 3H).  $^{13}\text{C}$  NMR (75 MHz,  $\text{CDCl}_3$ )  $\delta$  178.8, 138.1, 135.9, 134.9, 133.0, 132.5, 130.7, 130.1, 128.6, 128.5, 128.3, 126.2, 125.8, 125.3, 125.1, 122.5, 122.3, 81.5, 55.9, 52.8, 26.5, 25.6, 8.9, 8.7. HRMS (EI) calculated for  $\text{C}_{26}\text{H}_{26}\text{O}_2$  ( $[\text{M}]^+$ ): 370.1933 Found: 370.1924.

**(E)-3,3-diethyl-5-(2-methoxyphenyl)-4-styryldihydrofuran-2(3H)-one (5j)**

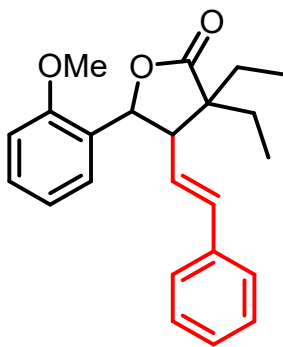

According to general procedure (III) with **1d** (0.20 mmol, 50.0 mg) and **4a** (0.16 mmol, 29.5 mg), the crude product was purified by column chromatography on silica gel (ethyl acetate/hexane) to provide **5j** as pale-yellow oil (29.7 mg, 53%).  $^1\text{H}$  NMR (300 MHz,  $\text{CDCl}_3$ )  $\delta$  7.37-7.22 (m, 7H), 7.04-6.93 (m, 1H), 6.89-6.80 (m, 1H), 6.27-6.25 (t,  $J = 3.0$  Hz, 2H), 5.68 (d,  $J = 9.0$  Hz, 1H), 3.73 (s, 3H), 3.30-3.22 (m, 1H), 1.95-1.85 (m, 2H), 1.71-1.53 (m, 2H), 1.08 (t,  $J = 7.5$  Hz, 3H), 1.01 (t,  $J = 7.5$  Hz, 3H).  $^{13}\text{C}$  NMR (75 MHz,  $\text{CDCl}_3$ )  $\delta$  179.4, 156.9, 136.7, 133.8, 129.5, 128.6, 127.6, 127.0, 126.4, 126.1, 124.0, 120.8, 110.8, 77.4 (overlap), 55.4, 54.6, 52.6, 26.3, 25.4, 8.9, 8.7. HRMS (EI) calculated for  $\text{C}_{23}\text{H}_{26}\text{O}_3$  ( $[\text{M}]^+$ ): 350.1882. Found: 350.1891.

**(E)-3,3-diethyl-5-(3-methoxyphenyl)-4-styryldihydrofuran-2(3H)-one (5k)**

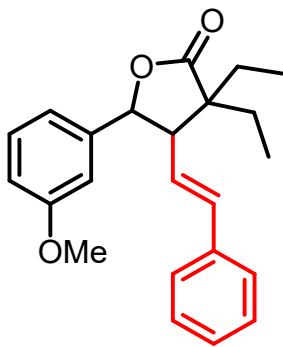

According to general procedure (III) with **1e** (0.20 mmol, 50.0 mg) and **4a** (0.16 mmol, 29.5 mg),

the crude product was purified by column chromatography on silica gel (ethyl acetate/hexane) to provide **5k** as pale-yellow oil (39.8 mg, 71%). <sup>1</sup>H NMR (300 MHz, CDCl<sub>3</sub>) δ 7.38-7.18 (m, 6H), 6.86 (t, *J* = 7.5 Hz, 3H), 6.33 (d, *J* = 15.0 Hz, 1H), 6.22 (dd, *J* = 15.0, 9.0 Hz, 1H), 5.23 (d, *J* = 9.0 Hz, 1H), 3.77 (s, 3H), 3.18-3.05 (m, 1H), 1.95-1.80 (m, 2H), 1.75-1.55 (m, 2H), 1.09 (t, *J* = 7.5 Hz, 3H), 0.98 (t, *J* = 7.5 Hz, 3H). <sup>13</sup>C NMR (75 MHz, CDCl<sub>3</sub>) δ 179.0, 159.7, 139.9, 136.4, 135.7, 129.6, 128.7, 128.0, 126.3, 122.8, 118.1, 113.9, 111.1, 81.5, 55.7, 55.2, 52.6, 26.6, 25.6, 8.9, 8.6. HRMS (EI) calculated for C<sub>23</sub>H<sub>26</sub>O<sub>3</sub> ([M]<sup>+</sup>): 350.1882. Found: 350.1891.

**(E)-3,3-diethyl-5-(4-methoxyphenyl)-4-styryldihydrofuran-2(3H)-one (5l)**

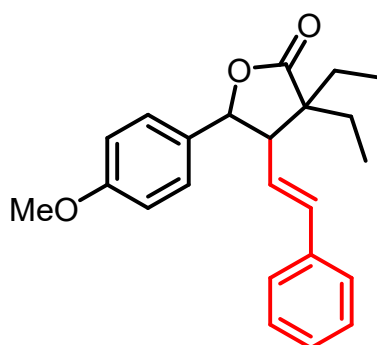

According to general procedure (III) with **1f** (0.20 mmol, 50.0 mg) and **4a** (0.16 mmol, 29.5 mg), the crude product was purified by column chromatography on silica gel (ethyl acetate/hexane) to provide **5l** as pale-yellow oil (45.4 mg, 81%). <sup>1</sup>H NMR (300 MHz, CDCl<sub>3</sub>) δ 7.35-7.20 (m, 7H), 6.95-6.80 (m, 2H), 6.31 (d, *J* = 15.0 Hz, 1H), 6.28-6.13 (m, 1H), 5.22 (d, *J* = 12.0 Hz, 1H), 3.79 (s, 3H), 3.18-3.08 (m, 1H), 1.95-1.80 (m, 2H), 1.75-1.55 (m, 2H), 1.09 (t, *J* = 7.5 Hz, 3H), 1.00 (t, *J* = 7.5 Hz, 3H). <sup>13</sup>C NMR (75 MHz, CDCl<sub>3</sub>) δ 179.0, 159.7, 136.4, 135.5, 130.1, 128.6, 127.9, 127.3, 126.3, 122.8, 113.9, 81.5, 55.6, 55.2, 52.6, 26.5, 25.4, 8.9, 8.6. HRMS (EI) calculated for C<sub>23</sub>H<sub>26</sub>O<sub>3</sub> ([M]<sup>+</sup>): 350.1882. Found: 350.1874.

**(E)-5-(4-chlorophenyl)-3,3-diethyl-4-styryldihydrofuran-2(3H)-one (5m)**

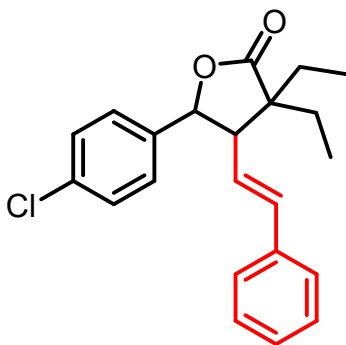

According to general procedure (III) with **1g** (0.20 mmol, 50.5 mg) and **4a** (0.16 mmol, 29.3 g), the crude product was purified by column chromatography on silica gel (ethyl acetate/hexane) to provide **5m** as pale-yellow oil (42.6 mg, 75%).  $^1\text{H NMR}$  (300 MHz,  $\text{CDCl}_3$ )  $\delta$  7.38-7.21 (m, 9H), 6.31 (d,  $J = 15.0$  Hz, 1H), 6.27-6.15 (m, 1H), 5.22 (d,  $J = 12.0$  Hz, 1H), 3.10-3.00 (m, 1H), 1.95-1.83 (m, 2H), 1.76-1.70 (m, 2H), 1.09 (t,  $J = 7.5$  Hz, 3H), 0.97 (t,  $J = 7.5$  Hz, 3H).  $^{13}\text{C NMR}$  (75 MHz,  $\text{CDCl}_3$ )  $\delta$  178.7, 136.9, 136.1, 136.0, 134.2, 128.8, 128.7, 128.1, 127.1, 126.3, 122.2, 80.8, 56.0, 52.5, 26.5, 25.4, 8.9, 8.6. **HRMS** (EI) calculated for  $\text{C}_{22}\text{H}_{23}\text{ClO}_2$  ( $[\text{M}]^+$ ): 354.1387. Found: 354.1390.

**(E)-3,3-diethyl-4-styryl-5-(p-tolyl)dihydrofuran-2(3H)-one (5n)**

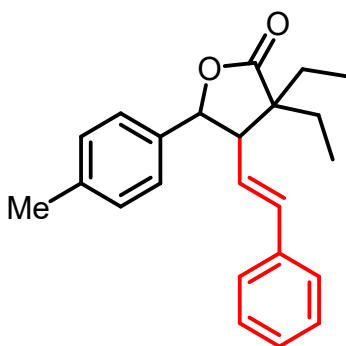

According to general procedure (III) with **1h** (0.20 mmol, 46.5 mg) and **4a** (0.16 mmol, 29.3 mg), the crude product was purified by column chromatography on silica gel (ethyl acetate/hexane) to provide **5n** as pale-yellow oil (32.6 mg, 61%).  $^1\text{H NMR}$  (300 MHz,  $\text{CDCl}_3$ )  $\delta$  7.40-7.10 (m, 9H), 6.32 (d,  $J = 15.0$  Hz, 1H), 6.22 (dd,  $J = 15.0, 9.0$  Hz, 1H), 5.24 (d,  $J = 9.0$  Hz, 1H), 3.20-3.05 (m, 1H), 2.35 (s, 3H), 1.95-1.83 (m, 2H), 1.79-1.60 (m, 2H), 1.10 (t,  $J = 7.5$  Hz, 3H), 1.00 (t,  $J = 7.5$  Hz, 3H).  $^{13}\text{C NMR}$  (75 MHz,  $\text{CDCl}_3$ )  $\delta$  179.0, 138.2, 136.4, 135.5, 135.2, 129.2, 128.6, 127.9, 126.3, 125.8, 122.8, 81.6, 55.6, 52.6, 26.5, 25.5, 21.1, 8.9, 8.6. **HRMS** (EI) calculated for  $\text{C}_{23}\text{H}_{26}\text{O}_2$  ( $[\text{M}]^+$ ): 334.1933. Found: 334.1938.

**(E)-4-(4,4-diethyl-5-oxo-3-styryltetrahydrofuran-2-yl)benzonitrile (5o)**

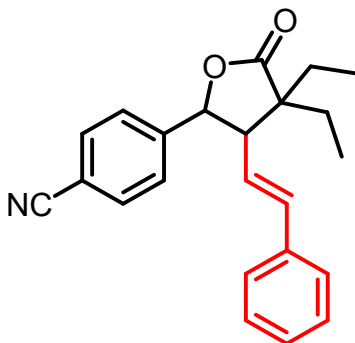

According to general procedure (III) with **1i** (61.7 mg, 0.254 mmol), **4a** (37.2 mg, 0.203 mmol), the crude was purified by column chromatography on silica gel (ethyl acetate/hexane) to provide **5o** as yellow oil as yellow liquid (19.4 mg, 28%); <sup>1</sup>H NMR (300 MHz, CDCl<sub>3</sub>) δ 7.64 (d, *J* = 9 Hz, 2H), 7.43 (d, *J* = 9 Hz, 2H), 7.35 (m, 5H), 6.31 (d, *J* = 15 Hz, 1H), 6.22 (dd, *J* = 15, 9 Hz, 1H), 5.27 (d, *J* = 9 Hz, 1H), 2.99 (dd, *J* = 9.0, 9.0 Hz, 1H), 1.91-1.84 (m, 2H), 1.78-1.54 (m, 2H), 1.11 (t, *J* = 7.5 Hz, 3H), 0.96 (t, *J* = 7.5 Hz, 3H). <sup>13</sup>C NMR (75 MHz, CDCl<sub>3</sub>) δ 178.3, 143.7, 136.5, 135.9, 132.4, 128.7, 128.3, 126.4, 126.1, 121.6, 118.4, 112.2, 56.1, 52.5, 26.4, 25.4, 8.8, 8.5. HRMS (EI) *m/z*: ([M]<sup>+</sup>) calcd for C<sub>23</sub>H<sub>23</sub>NO<sub>2</sub>; Found: 345.1725.

**(E)-3,3-diethyl-5-phenyl-4-(2-(pyridin-3-yl)vinyl)dihydrofuran-2(3H)-one (5p)**

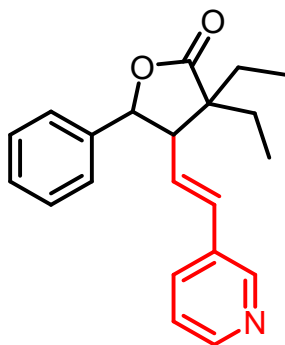

According to general procedure (III) with **1a** (0.20 mmol, 43.6 mg) and **4j** (0.16 mmol, 29.4 mg), the crude product was purified by column chromatography on silica gel (ethyl acetate/hexane) to provide **5o** as pale-yellow oil (40.1 mg, 78%). <sup>1</sup>H NMR (300 MHz, CDCl<sub>3</sub>) δ 8.51 (d, *J* = 18.0 Hz, 2H), 7.69-7.60 (m, 1H), 7.36-7.26 (m, 6H), 6.29 (d, *J* = 9.0 Hz, 2H), 5.25 (d, *J* = 12.0 Hz, 1H), 3.19-3.08 (m, 1H), 1.91-1.84 (m, 2H), 1.70-1.59 (m, 2H), 1.09 (t, *J* = 7.5 Hz, 3H), 0.99 (t, *J* = 7.5 Hz, 3H). <sup>13</sup>C NMR (75 MHz, CDCl<sub>3</sub>) δ 178.6, 148.9, 148.0, 138.0, 132.9, 132.1, 132.0, 128.6,

128.6, 125.8, 125.3, 123.5, 81.4, 55.9, 52.6, 26.5, 25.5, 8.9, 8.6. **HRMS** (EI) calculated for  $C_{21}H_{23}NO_2$  ( $[M]^+$ ): 321.1729. Found: 321.1723.

**(E)-3,3-dimethyl-5-phenyl-4-styryldihydrofuran-2(3H)-one (5q)**

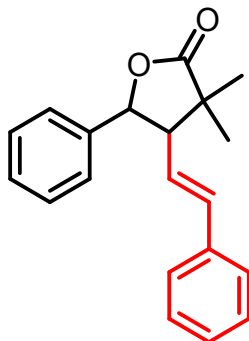

According to general procedure (III) with **1j** (23.76 mg, 0.125 mmol), **4a** (18.1 mg, 0.1 mmol), the crude was purified by column chromatography on silica gel (ethyl acetate/hexane) to provide **5q** as white solid, m.p.: 132-133 °C (21.3 mg, 73%); **<sup>1</sup>H NMR** (300 MHz,  $CDCl_3$ )  $\delta$  7.30 (s, 10H), 6.35 (d,  $J = 16.5$  Hz, 1H), 6.16 (dd,  $J = 16.5, 9$  Hz, 1H), 5.26 (d,  $J = 15$  Hz, 1H), 2.82 (dd,  $J = 9, 9$  Hz, 1H), 1.30 (d,  $J = 2$  Hz, 6H). **<sup>13</sup>C NMR** (75 MHz,  $CDCl_3$ )  $\delta$  181.1, 137.7, 136.4, 136.1, 128.9, 128.7, 128.3, 126.6, 126.0, 122.1, 81.9, 59.9, 45.2, 23.5, 19.7. **HRMS** (EI) calcd for  $C_{20}H_{20}O_2$  ( $[M]^+$ ): 292.1463. Found: 292.1459

**(E)-7-(4-methoxyphenyl)-8-styryl-6-oxaspiro[3.4]octan-5-one (5r)**

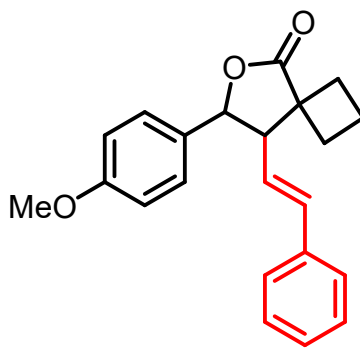

According to general procedure (III) with **1n** (50 mg, 0.215 mmol) and **4a** (31.5 mg 0.172 mmol), the crude was purified by column chromatography on silica gel (ethyl acetate/hexane) to provide **5r** as yellow oil (34 mg, 59%). **<sup>1</sup>H NMR** (300 MHz,  $CDCl_3$ )  $\delta$  7.41-7.23 (m, 7H), 6.87 (d,  $J = 9.0$  Hz, 2H), 6.47 (d,  $J = 18.0$  Hz, 1H), 6.27 (dd,  $J = 15.0, 9.0$  Hz, 1H), 5.10 (d,  $J = 9.0$  Hz, 1H), 3.79 (s, 3H), 2.92 (dd,  $J = 9.0, 9.0$  Hz, 1H), 2.89-2.56 (m, 1H), 2.45-2.42 (m, 1H), 2.31-2.26 (m, 2H),

2.03-1.99 (m, 1H), 1.92-1.86 (m, 1H).  $^{13}\text{C}$  NMR (75 MHz,  $\text{CDCl}_3$ )  $\delta$  180.1, 159.7, 136.3, 135.6, 129.3, 128.7, 128.1, 127.3, 126.4, 122.9, 113.9, 81.9, 57.3, 55.2, 49.1, 27.4, 25.7, 16.6. HRMS (EI) calculated for  $\text{C}_{22}\text{H}_{22}\text{O}_3$  ( $[\text{M}]^+$ ): 334.1569. Found: 334.1565.

**(E)-5-butyl-3,3-diethyl-4-styryldihydrofuran-2(3H)-one (5s)**

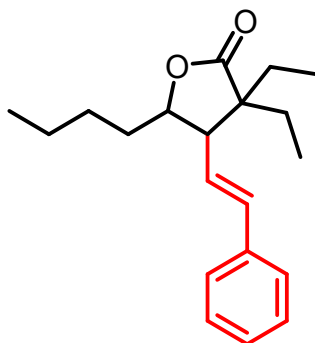

According to general procedure (III) with **1k** (0.13 mmol, 25.4 mg) and **4a** (0.14 mmol, 25.7 mg), the crude product was purified by column chromatography on silica gel (ethyl acetate/hexane) to provide **5s** as yellow oil (25.3 mg, 65%).  $^1\text{H}$  NMR (300 MHz,  $\text{CDCl}_3$ )  $\delta$  7.40-7.10 (m, 5H), 6.45-6.25 (m, 2H), 5.55-5.46 (m, 2H), 3.08 (t,  $J = 7.5$  Hz, 1H), 2.07-1.94 (m, 2H), 1.85-1.70 (m, 2H), 1.70-1.54 (m, 3H), 1.48-1.24 (m, 3H), 0.93-0.81 (m, 9H).  $^{13}\text{C}$  NMR (75 MHz,  $\text{CDCl}_3$ )  $\delta$  181.0, 137.6, 133.1, 131.0, 129.9, 128.5, 127.1, 126.2, 52.5, 51.8, 34.8, 29.7, 24.9, 24.5, 22.5, 13.7, 8.6, 8.4. HRMS (EI) calcd for  $\text{C}_{20}\text{H}_{28}\text{O}_2$  ( $[\text{M}]^+$ ): 300.2089. Found: 300.2083.

**(E)-3,3-diethyl-4-(2-methylstyryl)-5-phenyldihydrofuran-2(3H)-one (5t)**

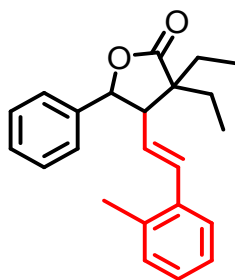

According to general procedure (III) with **1a** (0.20 mmol, 43.6 mg) and **4m** (0.16 mmol, 31.5 mg). The crude product was purified by column chromatography on silica gel (ethyl acetate/hexane) provide pure product **5t** as pale-yellow oil (10.7 mg, 20%).  $^1\text{H}$  NMR (300 MHz,  $\text{CDCl}_3$ )  $\delta$  7.45-7.23 (m, 6H), 7.22-7.10 (m, 3H), 6.48 (d,  $J = 16.5$  Hz, 1H), 6.12-6.00 (m, 1H), 5.24 (d,  $J = 9.0$  Hz, 1H), 3.18-3.03 (m, 1H), 2.18 (s, 3H), 1.89-1.59 (m, 4H), 1.09 (t,  $J = 7.5$  Hz, 1H), 0.99 (t,  $J = 7.5$

Hz, 1H).  $^{13}\text{C}$  NMR (75 MHz,  $\text{CDCl}_3$ )  $\delta$  179.1, 138.3, 135.8, 135.4, 134.0, 130.3, 128.5, 128.4, 127.9, 126.1, 125.8, 125.8 (overlap), 124.4, 81.6, 56.4, 52.3, 26.9, 25.3, 19.6, 8.9, 8.6. HRMS (EI) calculated for  $\text{C}_{23}\text{H}_{26}\text{O}_2$  ( $[\text{M}]^+$ ): 334.1933. Found: 334.1937.

**(E)-4-(4-methoxyphenyl)-2-phenylbut-3-enoic acid (6a)**

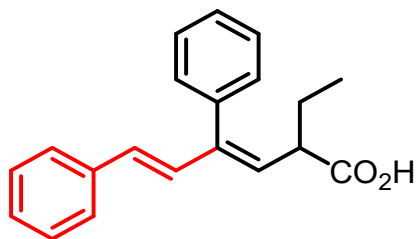

According to general procedure (III) with **1b** (40.0 mg, 0.21 mmol) and **4a** (30.7 mg, 0.168 mmol), the crude was purified by column chromatography on silica gel (ethyl acetate/hexane) to provide **6a** as yellow liquid. (25 mg, 51%).  $^1\text{H}$  NMR, (300 MHz,  $\text{CDCl}_3$ )  $\delta$  7.44-7.17 (m, 10H), 7.02 (d,  $J$  = 18 Hz, 1H), 6.43 (d,  $J$  = 15 Hz, 1H), 5.82 (d,  $J$  = 9 Hz, 1H), 2.93-3.02 (m, 1H), 1.82-1.72 (m, 1H), 1.63-1.54 (m, 1H), 0.85 (t,  $J$  = 6 Hz, 3H).  $^{13}\text{C}$  NMR (75 MHz,  $\text{CDCl}_3$ )  $\delta$  179.5, 144.1, 137.1, 137.0, 132.3, 131.4, 129.8, 129.5, 128.3, 127.4, 127.3, 126.3, 46.8, 26.0, 11.4. HRMS (EI) calculated for  $\text{C}_{20}\text{H}_{20}\text{O}_2$  ( $[\text{M}]^+$ ): 292.1459. Found: 292.1457.

**(3Z,5Z)-2,2-diethyl-4-phenylundeca-3,5-dienoic acid (6b)**

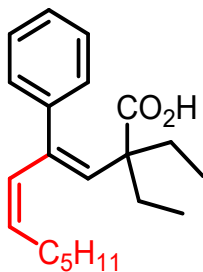

According to general procedure (III) with **1a** (0.27 mmol, 58.0 mg) and **4k** (0.21 mmol, 37.5 mg), the crude product was purified by column chromatography on silica gel (ethyl acetate/hexane) to provide **6b** as pale-yellow oil (46.2 mg, 70%).  $^1\text{H}$  NMR (300 MHz,  $\text{CDCl}_3$ )  $\delta$  7.27-7.21 (m, 3H), 7.17-7.10 (m, 2H), 6.03-5.91 (m, 1H), 5.72 (s, 1H), 5.40-5.30 (m, 1H), 1.83-1.70 (m, 2H), 1.68-1.54 (m, 4H), 1.28-1.10 (m, 6H), 0.89-0.75 (m, 9H).  $^{13}\text{C}$  NMR (75 MHz,  $\text{CDCl}_3$ )  $\delta$  181.6, 140.3, 140.0, 132.7, 132.7, 132.0, 128.5, 127.8, 127.1, 51.8, 31.5, 29.7, 28.9, 27.8, 22.4, 14.0, 8.7. HRMS (EI) calculated for  $\text{C}_{21}\text{H}_{30}\text{O}_2$  ( $[\text{M}]^+$ ): 314.2246. Found: 314.2242.



**(3Z,5Z)-6-cyclohexyl-2,2-diethyl-4-phenylhexa-3,5-dienoic acid (6c)**

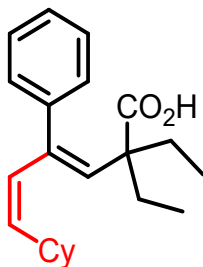

According to general procedure (III) with **1a** (0.20 mmol, 43.6 mg) and **4I** (0.16 mmol, 30.3 mg), the crude product was purified by column chromatography on silica gel (ethyl acetate/hexane) to provide **6c** as pale-yellow oil (41.8 mg, 80%). <sup>1</sup>H NMR (300 MHz, CDCl<sub>3</sub>) δ 7.29-7.21 (m, 3H), 7.18-7.10 (m, 2H), 5.89 (d, *J* = 12.0 Hz, 1H), 5.74 (s, 1H), 5.18 (d, *J* = 9.0 Hz, 1H), 1.65-1.60 (m, 4H), 1.58-1.56 (m, 3H), 0.95-0.88 (m, 8H), 0.82 (t, *J* = 7.5 Hz, 6H). <sup>13</sup>C NMR (75 MHz, CDCl<sub>3</sub>) δ 181.7, 140.6, 140.0, 137.8, 132.5, 131.1, 128.6, 127.8, 127.1, 51.9, 36.3, 33.3, 28.9, 25.9, 25.8, 8.7. HRMS (EI) calculated for C<sub>22</sub>H<sub>30</sub>O<sub>2</sub> ([M]<sup>+</sup>): 326.2246. Found: 326.2237.

**(E)-4-((Z)-2-cyclohexylvinyl)-2,2-diethyloct-3-enoic acid (6d)**

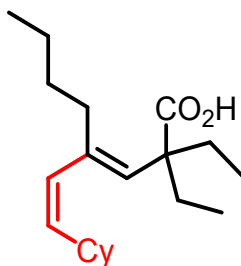

According to general procedure (III) with **1k** (0.18 mmol, 35.7 mg) and **4I** (0.14 mmol, 25.6 mg), the crude product was purified by column chromatography on silica gel (ethyl acetate/hexane) to provide **6d** as yellow oil (31.3 mg, 73%). <sup>1</sup>H NMR (300 MHz, CDCl<sub>3</sub>) δ 5.67 (d, *J* = 12 Hz, 1H), 5.31-5.15 (m, 2H), 2.00 (t, *J* = 7.5 Hz, 2H), 1.92-1.53 (m, 9H), 1.32-1.06 (m, 10H), 0.86 (t, *J* = 7.5 Hz, 9H). <sup>13</sup>C NMR (75 MHz, CDCl<sub>3</sub>) δ 182.3, 140.0, 137.6, 130.0, 129.4, 50.6, 37.2, 33.6, 31.6, 29.7, 28.9, 26.1, 25.9, 22.9, 14.0, 8.5. HRMS (EI) calcd for C<sub>20</sub>H<sub>34</sub>O<sub>2</sub> ([M]<sup>+</sup>): 306.2553. Found: 306.2554.

**(3E,5Z)-4-butyl-2,2-diethylundeca-3,5-dienoic acid (6e)**

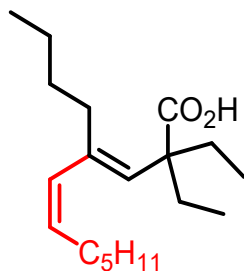

According to general procedure (III) with **1k** (0.25 mmol, 50.0 mg) and **4k** (0.14 mmol, 25.7 mg), the crude product was purified by column chromatography on silica gel (ethyl acetate/hexane) to provide **6e** as yellow oil (47.3 mg, 73%). <sup>1</sup>H NMR (300 MHz, CDCl<sub>3</sub>) δ 5.76 (d, *J* = 12 Hz, 1H), 5.50-5.39 (m, 1H), 5.17 (s, 1H), 2.20 (q, *J* = 7.5 Hz, 1H), 2.03 (t, *J* = 6 Hz, 1H), 1.92-1.73 (m, 6H), 1.45-1.21 (m, 8H), 0.95-0.80 (m, 12H). <sup>13</sup>C NMR (75 MHz, CDCl<sub>3</sub>) δ 183.3, 139.5, 131.8, 130.0, 50.7, 31.7, 31.6, 29.8, 29.7, 28.8, 28.5, 22.9, 22.5, 14.0, 13.9, 8.6. HRMS (EI) calcd for C<sub>19</sub>H<sub>34</sub>O<sub>2</sub> ([M]<sup>+</sup>): 294.2553. Found: 294.2559.

**(E)-3-((E)-benzylidene)-2,2-diethyl-5-phenylpent-4-enoic acid (6f)**

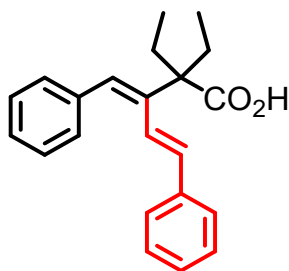

According to general procedure (III) with **1a** (0.20 mmol, 43.6 mg) and **4a** (0.16 mmol, 29.3 mg), the crude product was purified by column chromatography on silica gel (ethyl acetate/hexane) to provide **6f** as pale-yellow oil (17.9 mg, 35%). <sup>1</sup>H NMR (300 MHz, CDCl<sub>3</sub>) δ 7.20-7.15 (m, 5H), 7.04-6.96 (m, 6H), 6.15 (s, 1H), 6.03 (d, *J* = 15 Hz, 1H), 1.73-1.65 (m, 4H), 0.83 (t, *J* = 9 Hz, 6H). <sup>13</sup>C NMR (75 MHz, CDCl<sub>3</sub>) δ 181.6, 142.1, 137.3, 137.3, 135.1, 134.9, 130.3, 129.4, 128.5, 127.9, 127.4, 127.3, 126.4, 52.4, 29.2, 8.9. HRMS (EI) calculated for C<sub>22</sub>H<sub>24</sub>O<sub>2</sub> ([M]<sup>+</sup>): 320.1776. Found: 320.1769.

**(E)-3-((E)-benzylidene)-2,2-diethyl-5-(o-tolyl)pent-4-enoic acid (6g)**

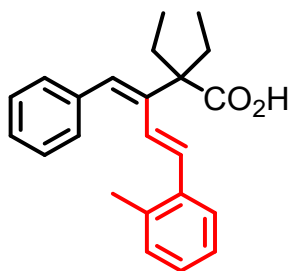

According to general procedure (III) with **1a** (0.20 mmol, 43.6 mg) and **4m** (0.16 mmol, 31.5 mg), the crude product was purified by column chromatography on silica gel (ethyl acetate/hexane) to provide **6g** as pale-yellow oil (36.9 mg, 69%). **<sup>1</sup>H NMR** (300 MHz, CDCl<sub>3</sub>) δ 7.55-7.25 (m, 4H), 7.23-7.00 (m, 5H), 6.94 (d, *J* = 15.0 Hz, 1H), 6.08-6.00 (m, 2H), 2.04 (s, 3H), 1.70-1.60 (m, 4H), 0.85 (t, *J* = 9.0 Hz, 6H). **<sup>13</sup>C NMR** (75 MHz, CDCl<sub>3</sub>) δ 181.8, 142.4, 137.4, 136.3, 135.6, 134.5, 130.2, 129.3, 128.7, 128.4, 127.8, 127.3, 127.1, 126.0, 125.0, 52.4, 29.1, 19.4, 8.8. **HRMS** (EI) calculated for C<sub>23</sub>H<sub>26</sub>O<sub>2</sub> ([M]<sup>+</sup>): 334.1933. Found: 334.1936.

#### Methyl (E)-2,2-diethyl-4-phenylbut-3-enoate (**7**)

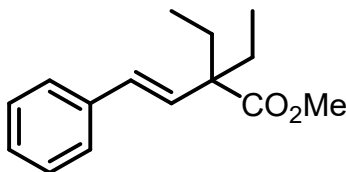

MeI (212 mg, 1.5 mmol) was added to a solution containing K<sub>2</sub>CO<sub>3</sub> (166 mg, 1.2 mmol) and **1a** (218 mg, 1 mmol) in dry DMF under Argon and the reaction mixture was kept for stirring in a preheated oil bath at 75 °C for 30 min. After cooling to room temperature, the water was added and extracted with diethyl ether, washed with sodium chloride solution, dried over MgSO<sub>4</sub>, filtered, and concentrated under *vacuo*. The obtained crude residue was purified by silica gel column chromatography (ethyl acetate/hexane) to provide the **7** as pale-yellow oil (230 mg, 99%). **<sup>1</sup>H NMR** (300 MHz, CDCl<sub>3</sub>) δ 7.49-7.43 (m, 2H), 7.37-7.32 (m, 2H), 7.28-7.25 (m, 1H), 6.47 (d, *J* = 3.0 Hz, 2H), 3.75 (s, 3H), 1.91 (q, *J* = 7.3 Hz, 4H), 0.91 (t, *J* = 7.3 Hz, 6H). **<sup>13</sup>C NMR** (75 MHz, CDCl<sub>3</sub>) δ 175.7, 137.2, 131.5, 129.3, 128.3, 127.1, 126.1, 52.6, 51.6, 28.7, 8.7. **HRMS** (EI) calculated for C<sub>15</sub>H<sub>20</sub>O<sub>2</sub> ([M]<sup>+</sup>): 232.1463. Found: 232.1454.

## Mechanistic Studies

### a) Deuterium incorporation experiments

#### (E)-4-phenylbut-3-enoic-4-*d* acid (**8**)

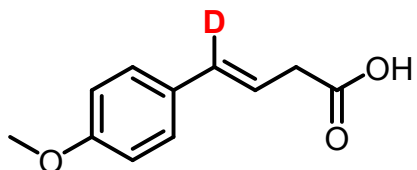

According to general procedure for the synthesis of  $\beta,\gamma$ -unsaturated carboxylic acids with 4-methoxybenzaldehyde- $\alpha$ - $d_1$  (100 mg, 0.92 mmol) and (2-carboxyethyl)triphenylphosphonium bromide (0.46 g, 1.10 mmol), the crude product was purified by column chromatography on silica gel (ethyl acetate/hexane) to provide **8** as a yellow liquid (71 mg, 40%);  $^1\text{H NMR}$  (300 MHz,  $\text{CDCl}_3$ )  $\delta$  7.30 (d,  $J = 7.5$  Hz, 2H), 6.84 (d,  $J = 7.5$  Hz, 2H), 6.18-6.05 (m, 1H), 3.80 (s, 3H), 3.25 (d,  $J = 6$  Hz, 2H)  $^{13}\text{C NMR}$  (75 MHz,  $\text{CDCl}_3$ )  $\delta$  176.8, 159.2, 133.2, 132.8, 132.5, 129.4, 127.4, 118.7, 113.9, 55.2, 38.0. **HRMS** (EI) calcd for  $\text{C}_{11}\text{H}_{11}\text{DO}_3$  ( $[\text{M}]^+$ ): 193.0849. Found: 193.0841.

#### (E)-2,2-diethyl-4-(4-methoxyphenyl)but-3-enoic-4-*d* acid (**1f-d<sub>1</sub>**)

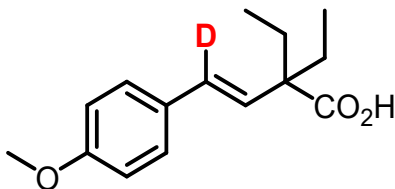

According to general procedure (I) with **8** (67.8 mg, 0.35 mmol), the crude product was purified by column chromatography on silica gel (ethyl acetate/hexane) to provide **1f-d<sub>1</sub>** as a yellow liquid (41.2 mg, 60%);  $^1\text{H NMR}$  (300 MHz,  $\text{CDCl}_3$ )  $\delta$  7.32 (dd,  $J = 9, 1$  Hz, 2H), 6.84 (dd,  $J = 4.5, 7.5$  Hz, 2H), 6.24 (s, 1H), 3.79 (s, 3H), 1.84 (q,  $J = 6, 15$  Hz, 4H), 0.88 (t,  $J = 6$  Hz, 6H)  $^{13}\text{C NMR}$  (75 MHz,  $\text{CDCl}_3$ )  $\delta$  180.3, 158.9, 131.4, 129.2, 127.3, 113.8, 55.2, 52.4, 28.6, 8.8. **HRMS** (EI) calcd for  $\text{C}_{15}\text{H}_{19}\text{DO}_3$  ( $[\text{M}]^+$ ): 249.1475. Found: 249.1467.

#### (E)-3,3-diethyl-5-(4-methoxyphenyl)-4-styryldihydrofuran-2(3H)-one-5-*d* (**5l-d<sub>1</sub>**)

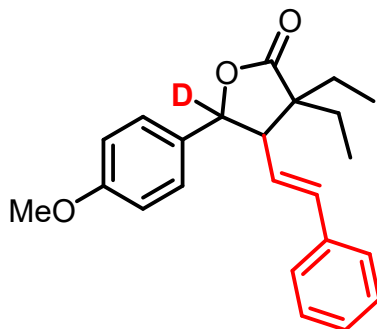

According to general procedure III with **1f-d<sub>1</sub>** (41.2 mg, 0.165 mmol), the crude product was purified by column chromatography on silica gel (ethyl acetate/hexane) to provide **5l-d<sub>1</sub>** as yellow liquid (30.2 mg, 65%). **<sup>1</sup>H NMR** (300 MHz, CDCl<sub>3</sub>) δ 7.37-7.22 (m, 7H), 6.88 (d, *J* = 9 Hz, 2H), 6.31 (d, *J* = 18 Hz, 1H), 6.20 (dd, *J* = 15, 9 Hz, 1H), 5.22 (d, *J* = 12 Hz, 1H), 3.80 (s, 3H), 3.12 (d, *J* = 9 Hz, 1H), 1.93-1.82 (m, 2H), 1.75-1.52 (m, 2H), 1.09 (t, *J* = 7.5 Hz, 3H), 1.00 (t, *J* = 7.5 Hz, 3H). **<sup>13</sup>C NMR** (75 MHz, CDCl<sub>3</sub>) δ 179.07, 159.67, 136.38, 135.51, 130.05, 128.65, 127.99, 127.37, 126.33, 122.74, 113.95, 81.57, 77.46, 77.04, 76.62, 55.53, 55.28, 52.59, 26.55, 25.50, 8.98, 8.71. **HRMS** (EI) calcd for C<sub>23</sub>H<sub>25</sub>DO<sub>3</sub> ([M]<sup>+</sup>): 351.1939. Found: 351.1937.

## b) Competitive KIE

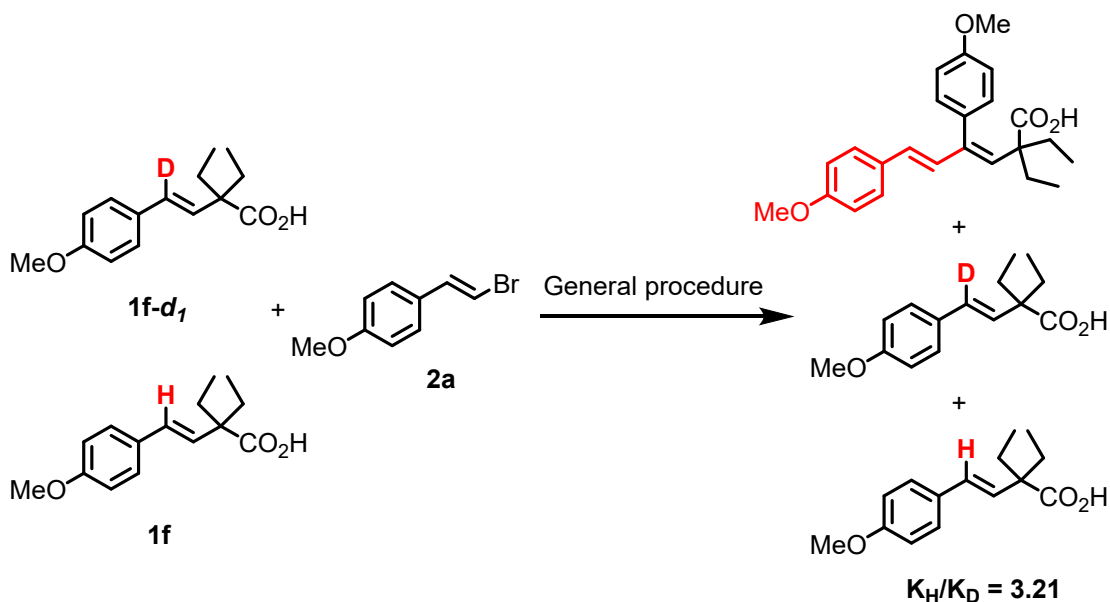

A screw-cap schlenk tube was charged with **1f** (0.375 mmol), **1f-d<sub>1</sub>** (0.375 mmol), **2a** (0.3 mmol), Cs<sub>2</sub>CO<sub>3</sub> (0.42 mmol) and Pd(OAc)<sub>2</sub> (5 mol%) followed by dry toluene (6 ml) were added. The reaction mixture was kept for stirring in a preheated oil bath at 110 °C for 4 minutes. The resulting

mixture was then extracted with ethyl acetate (25 mL). The filtrate was dried over  $\text{MgSO}_4$  and concentrate under reduced pressure. The  $^1\text{H}$  NMR analyses of the products afford the KIE value ( $K_{\text{H}}/K_{\text{D}} = 3.21$ ).

**c) Parallel KIE**

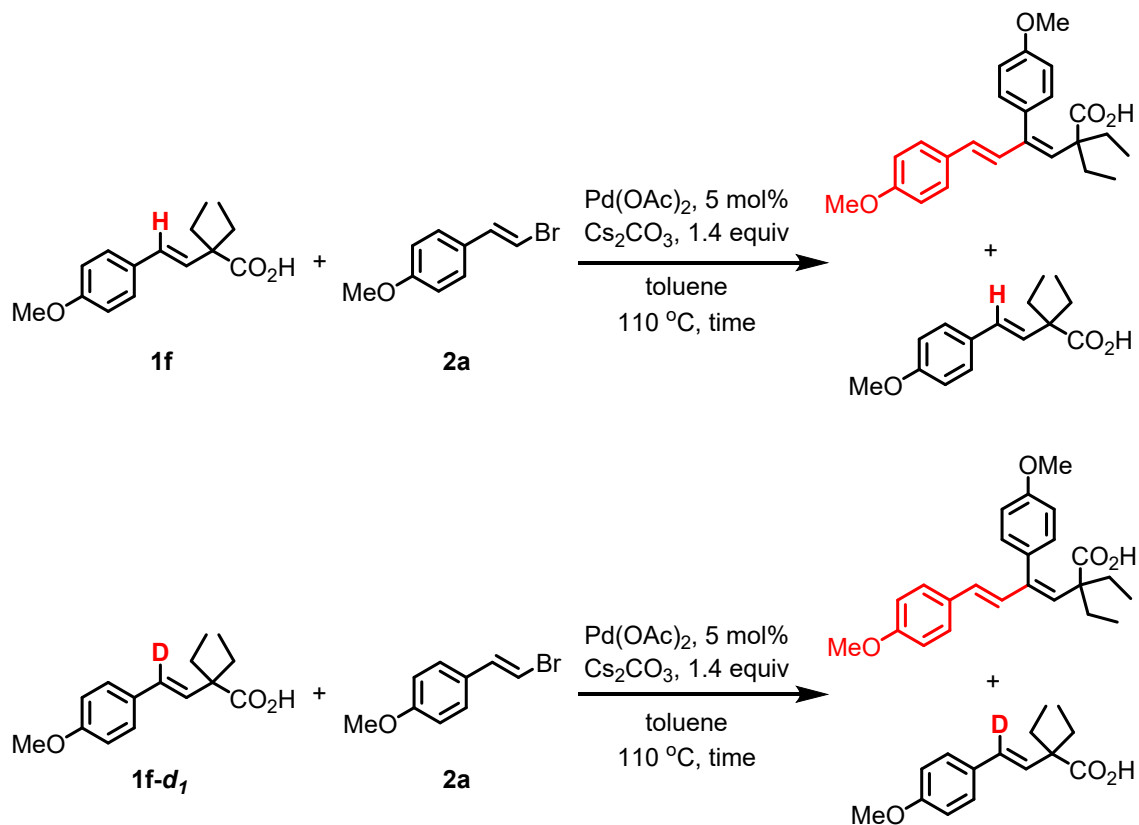

Run 1: **1f** (0.375 mmol), **2a** (0.30 mmol),  $\text{Pd(OAc)}_2$  (0.015 mmol),  $\text{Cs}_2\text{CO}_3$  (0.42 mmol), toluene (6 mL)

Run 2: **1f-d<sub>1</sub>** (0.375 mmol), **2a** (0.30 mmol),  $\text{Pd(OAc)}_2$  (0.015 mmol),  $\text{Cs}_2\text{CO}_3$  (0.42 mmol), toluene (6 mL)

**Fig S1.** Run 1 and 2 plot of product formation (**3o**)

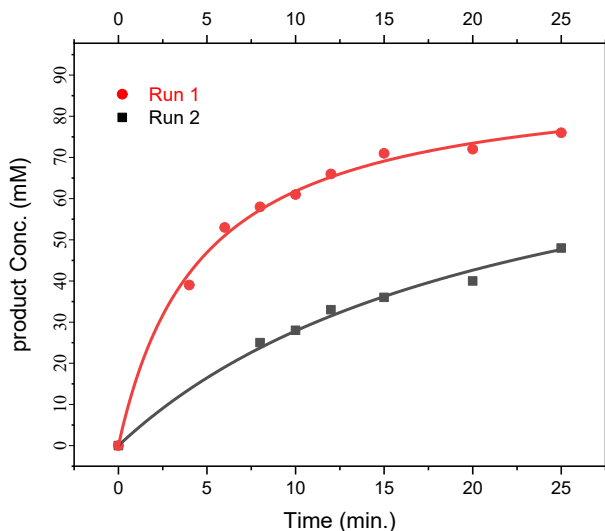

Run 1:

$$\text{Rate 1} = K_H \cdot [\mathbf{1f}]^x [\mathbf{2a}]^y$$

$$\text{Rate (mmol}^{-1}\cdot\text{min}^{-1}) = K_H \cdot [0.375]^x [0.30]^y \dots\dots\dots(\text{eq. I})$$

Run 2:

$$\text{Rate 2} = K_D \cdot [\mathbf{1f-d}_2]^x [\mathbf{2a}]^y$$

$$\text{Rate (mmol}^{-1}\cdot\text{min}^{-1}) = K_D \cdot [0.375]^x [0.30]^y \dots\dots\dots(\text{eq. II})$$

From equation (I) and (II)

$$K_H/K_D = 1.82802 \text{ (mmol}^{-1}\cdot\text{min}^{-1}) / 0.51724 \text{ (mmol}^{-1}\cdot\text{min}^{-1})$$

$$K_H/K_D = 3.53$$

## Synthetic Applications

### a) Gram-scale synthesis

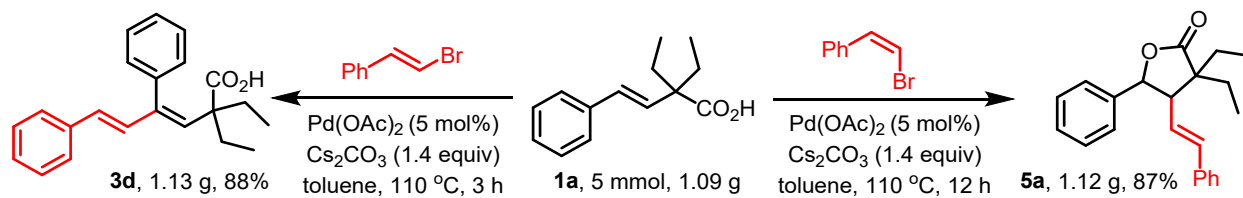

**For 3d:** According to general procedure (II) with **1a** (5.0 mmol, 1.09 g) and **2d** (4.0 mmol, 0.73 g), the crude product was purified by column chromatography on silica gel (ethyl acetate/hexane) to provide **3d** as pale-yellow oil (1.13 g, 88%).

**For 5a:** According to general procedure (III) with **1a** (5.0 mmol, 1.09g) and **4a** (4.0 mmol, 0.73

g), the crude product was purified by column chromatography on silica gel (ethyl acetate/hexane) to provide **5a** as white solid (1.12 g, 87%).

**b) Reaction of 1a with inseparable Z/E vinyl bromides**

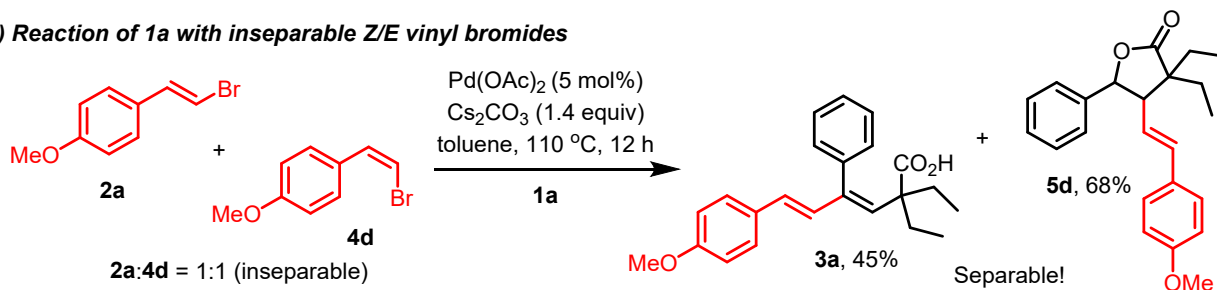

To a screw cap schlenk tube **1a** (0.58 mmol, 126.6 mg), **2a** (0.26 mmol, 91 mg), and **4d** (0.26 mmol, 91 mg),  $\text{Cs}_2\text{CO}_3$  (0.73 mmol, 237 mg) and  $\text{Pd}(\text{OAc})_2$  (0.026 mmol, 5.8 mg) followed by dry toluene (10.4 ml) were added. The resulting mixture was kept for stirring in a preheated oil bath at 110 °C for 12 h. The obtained mixture was then diluted with EtOAc and filtered through a pad of celite. The solvent was removed under vacuo and the crude residue was purified by flash column chromatography on silica gel (ethyl acetate/hexane) to provide **3a** (40.9 mg, 45%) and **5c** (61.9 mg, 68%).

#### 4. Reference:

1. C. Alamillo-Ferrer, M. Karabourniotis-Sotti, A. R. Kennedy, M. Campbell, N. C. O. Tomkinson, *Org. Lett.*, 2016, **18**, 3102.
2. (a) I. Scheipers, E. Koch, A. Studer, *Org. Lett.*, 2017, **19**, 1741; (b) A. H. Mermerian, G. C. Fu, *J. Am. Chem. Soc.*, 2005, **127**, 5604; (c) R. H. Van der Veen, H. Cerfontain, *J. Org. Chem.*, 1985, **50**, 342; (d) A. Manick, H. Tanaka, K. Oisaki, M. Kanai, *Synthesis*, 2018, **50**, 2936.
3. J. M. Muñoz-Molina, P. J. Pérez. *J. Org. Chem.*, 2019, **84**, 8289.
4. P. Pawluc', G. Hreczycho, J. Szudkowska, M. Kubicki, B. Marciniak, *Org. Lett.*, 2009, **11**, 3390.
5. V. N. Telvekar, B. S. Takale, *Tetrahedron Lett.*, 2011, **52**, 2394.
6. C. Qiu, K. Yao, X. Zhang, H. Gong, *Org. Biomol. Chem.*, 2016, **14**, 11332.
7. D. Chang, Y. Gu, Q. Shen, *Chem. Eur. J.*, 2015, **21**, 6074.
8. F. Zhan, G. Liang, *Angew. Chem. Int. Ed.*, 2013, **52**, 1266.
9. J. Mao, W. Bao, *Org. Lett.*, 2014, **16**, 2646.



## 5. NMR Spectra:

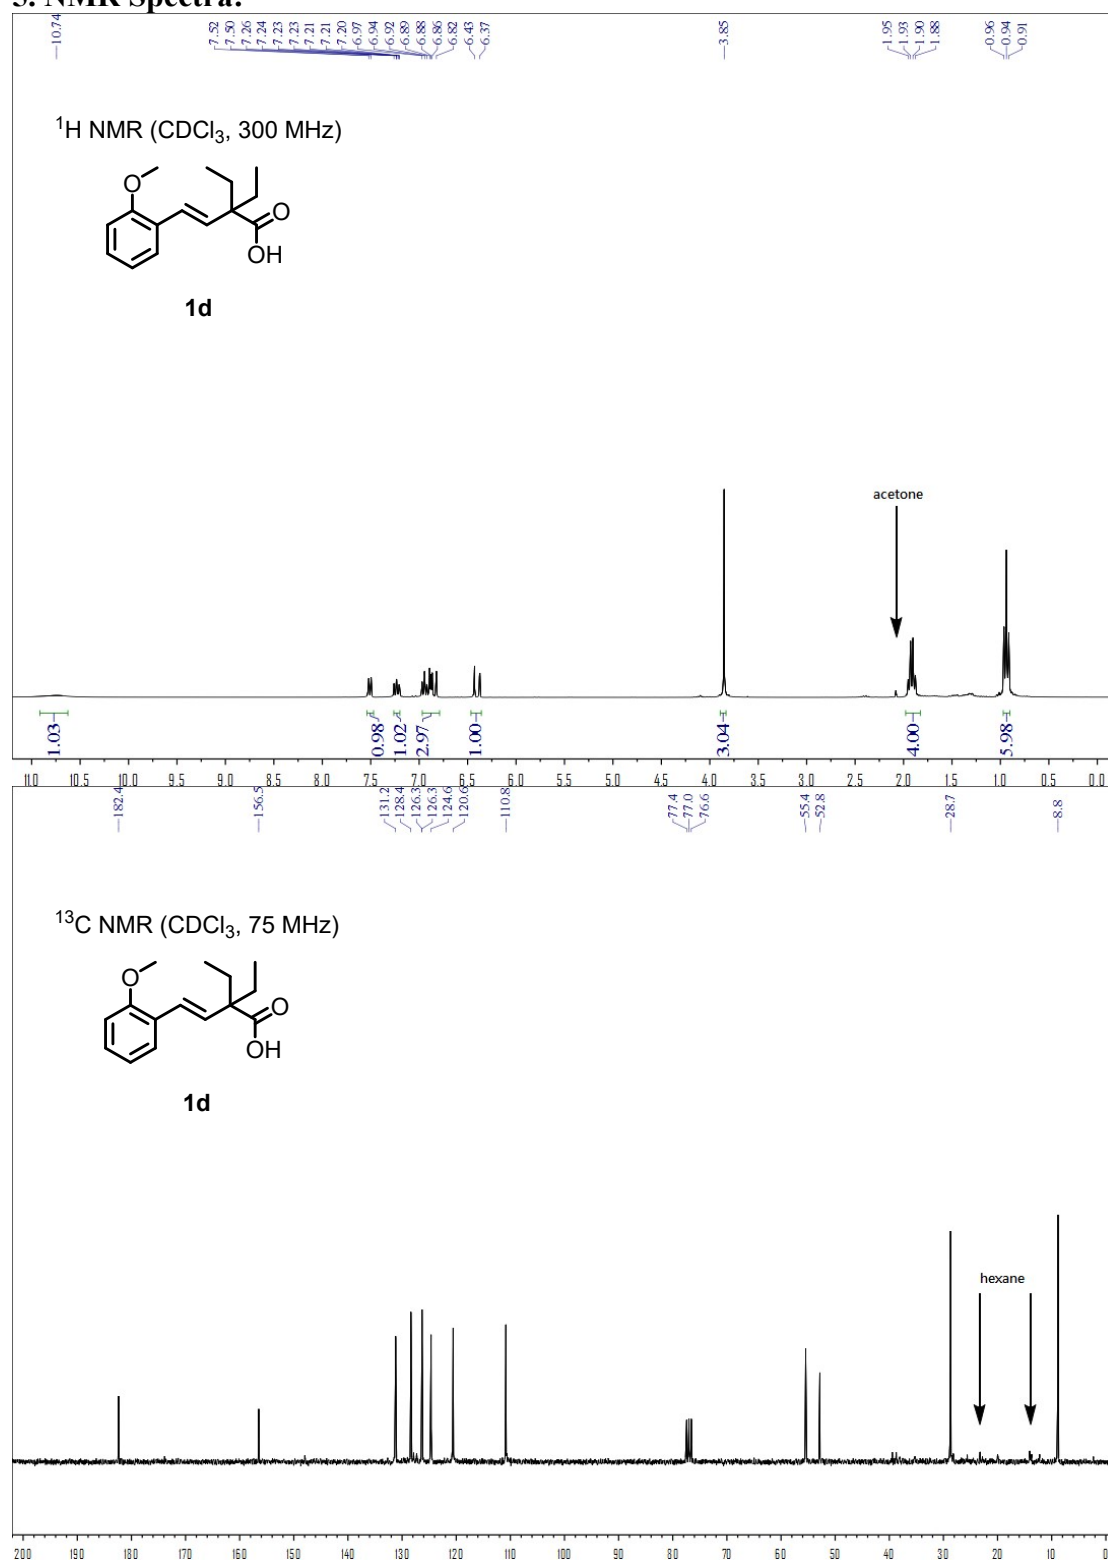

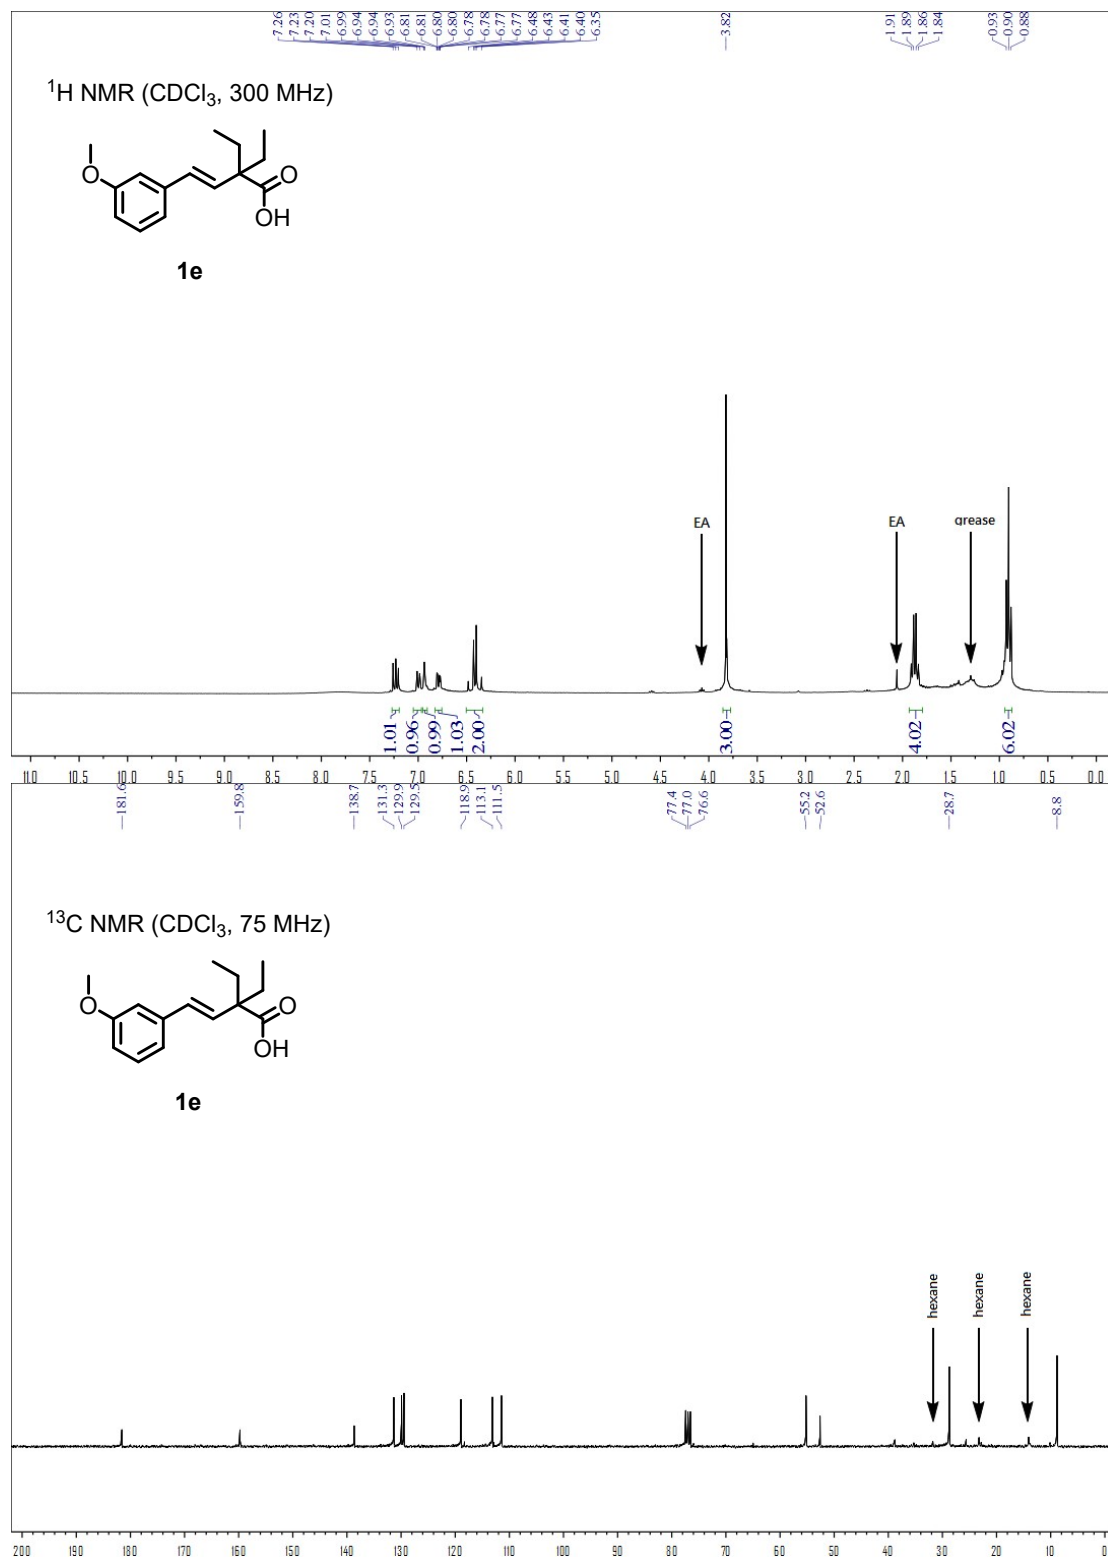

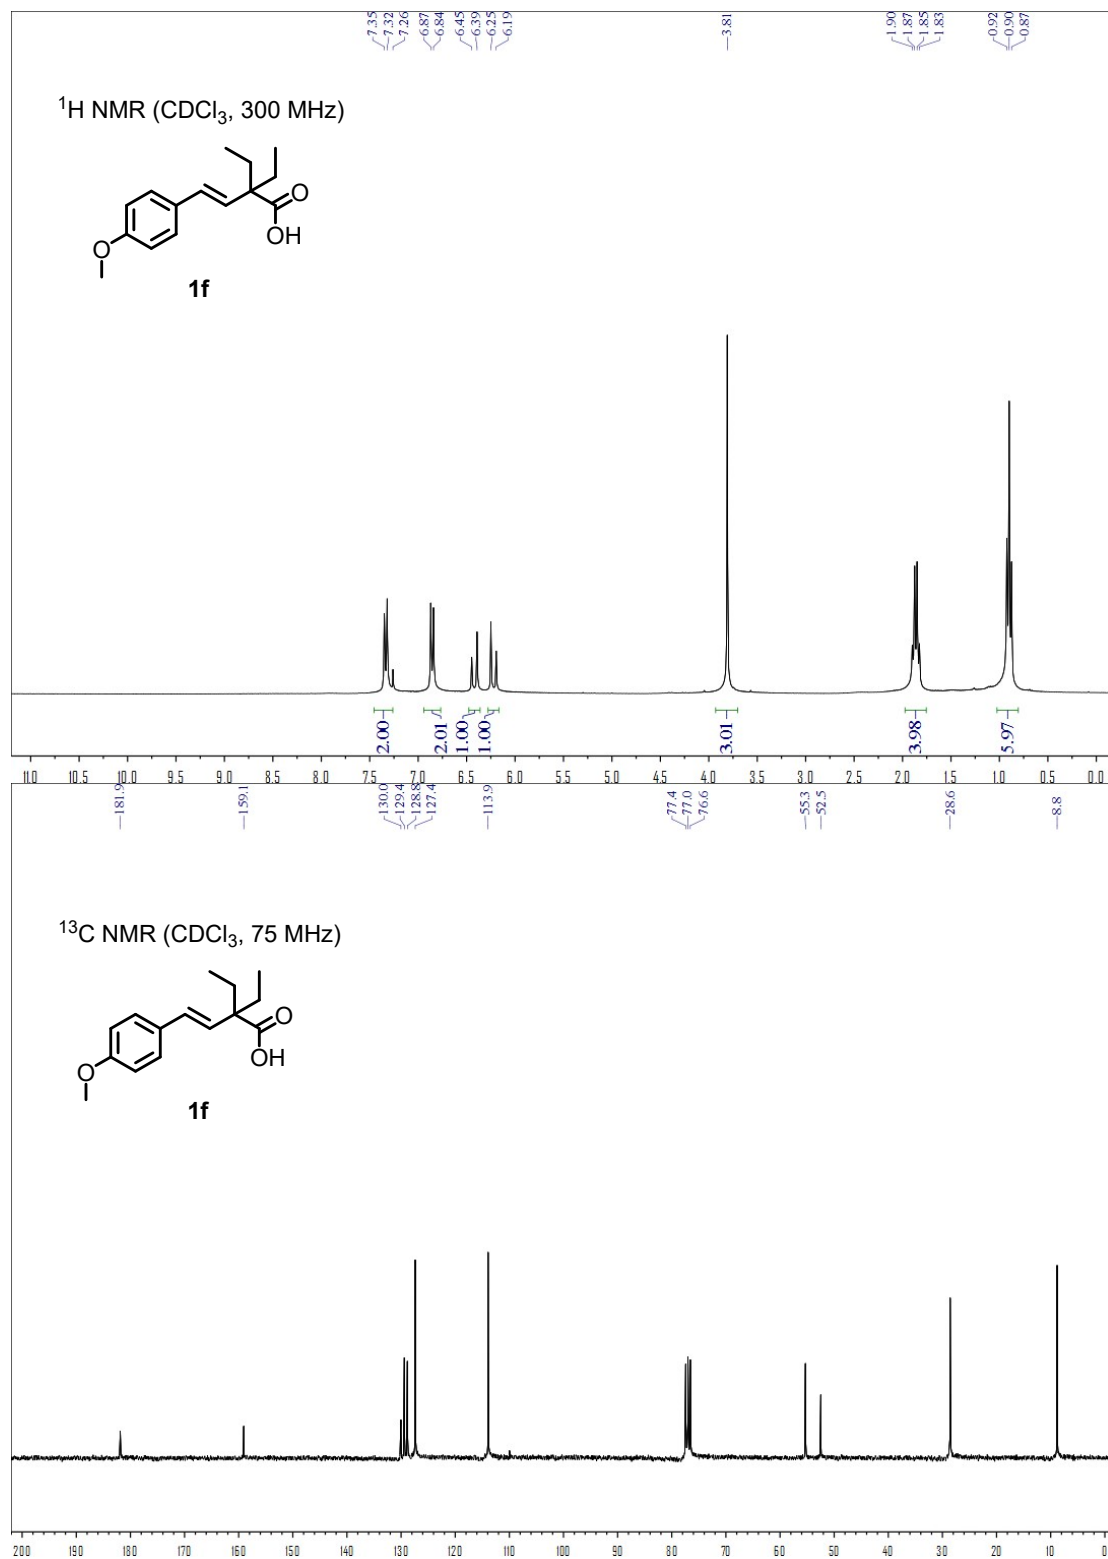

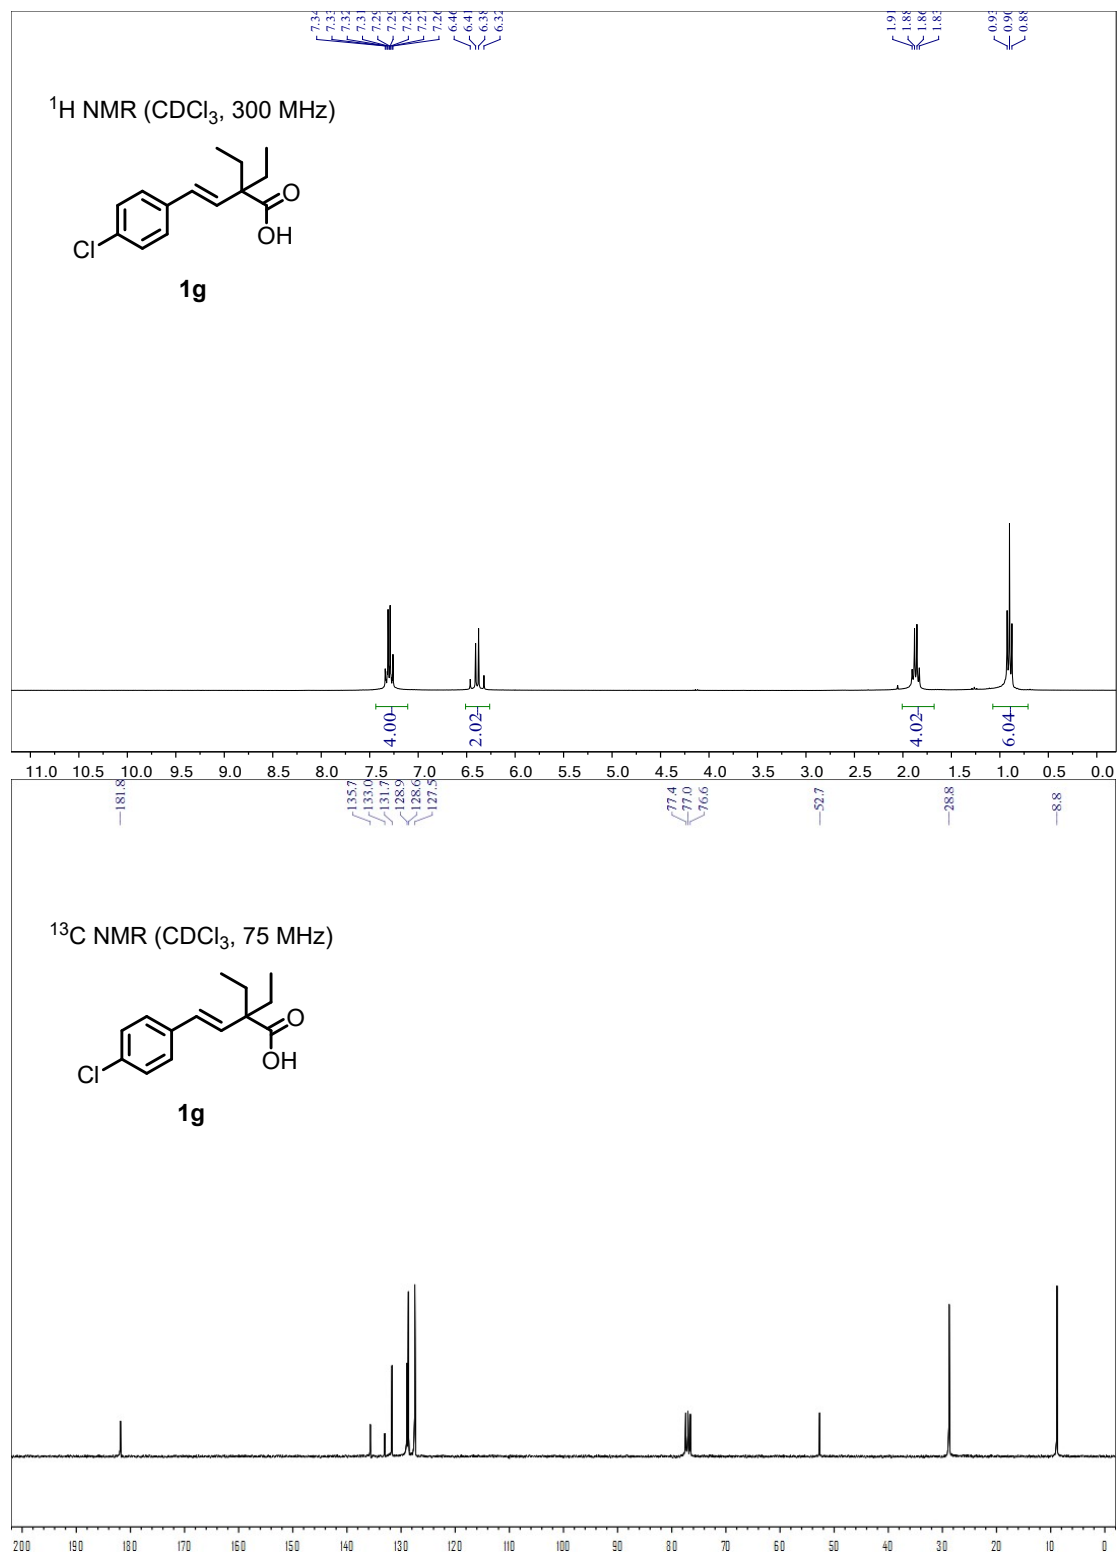

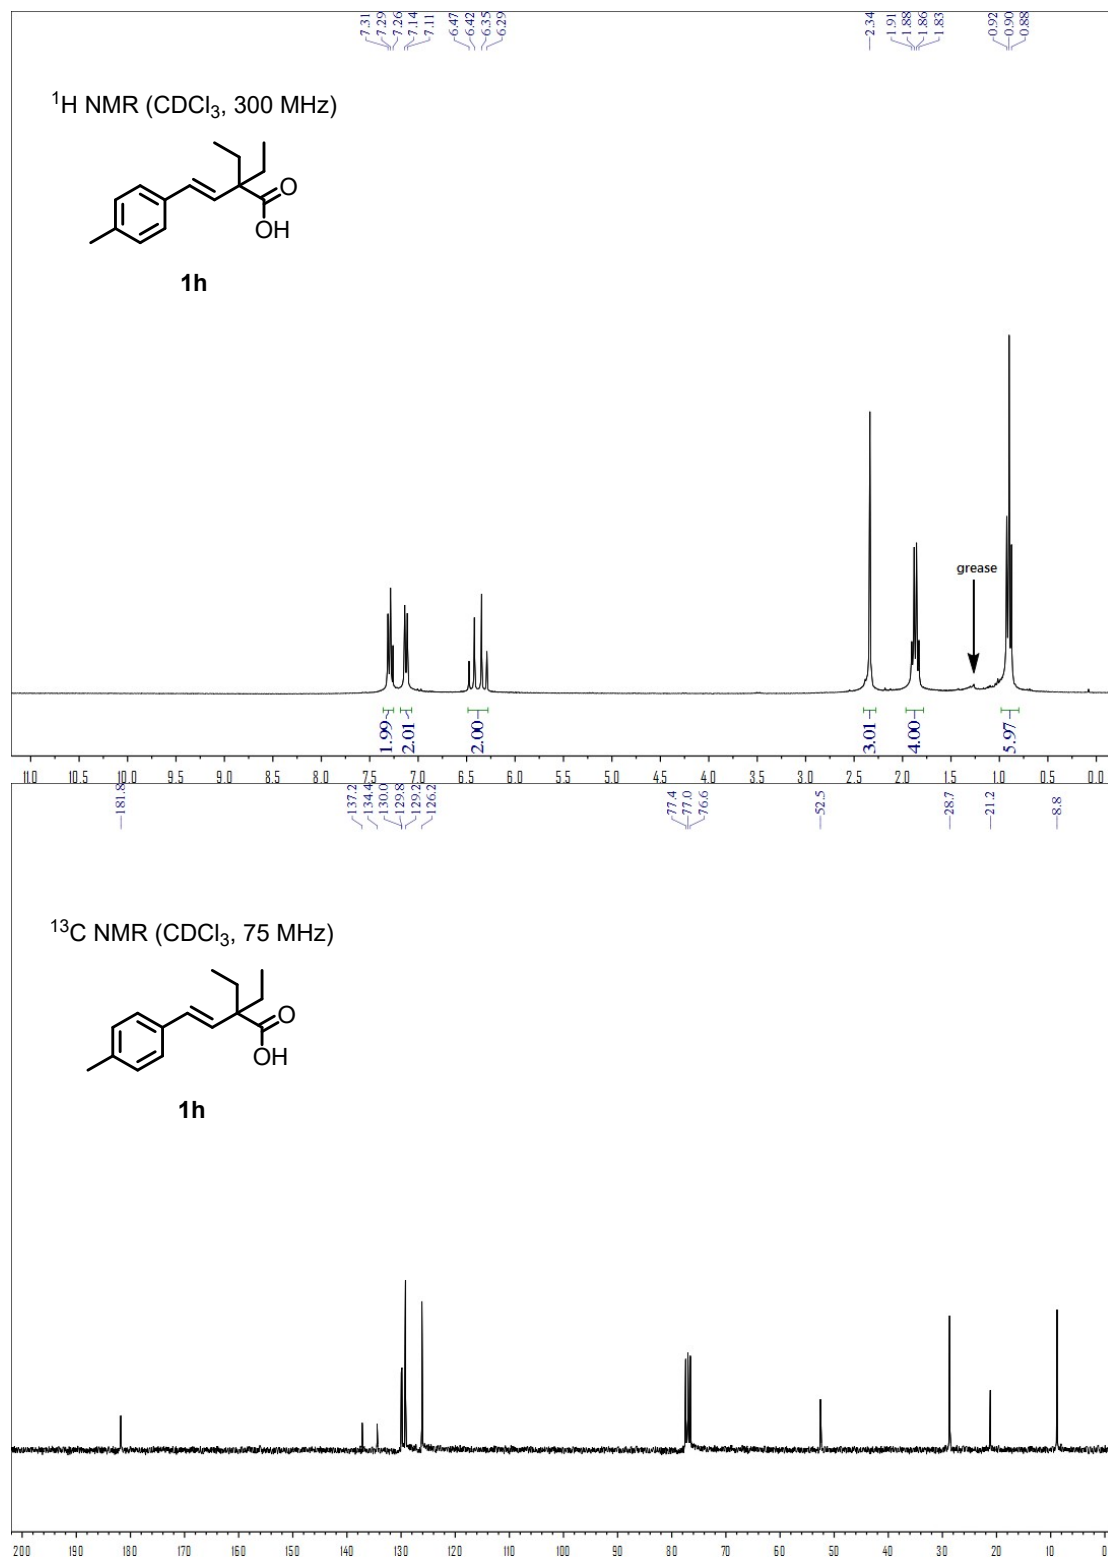

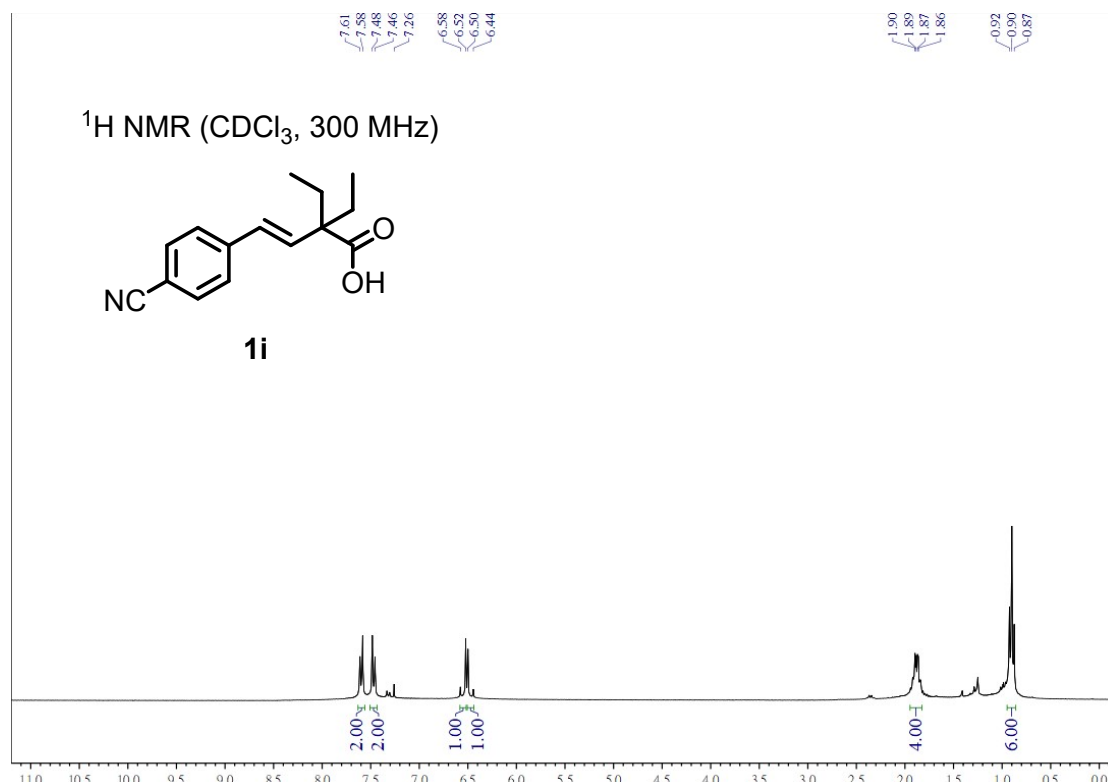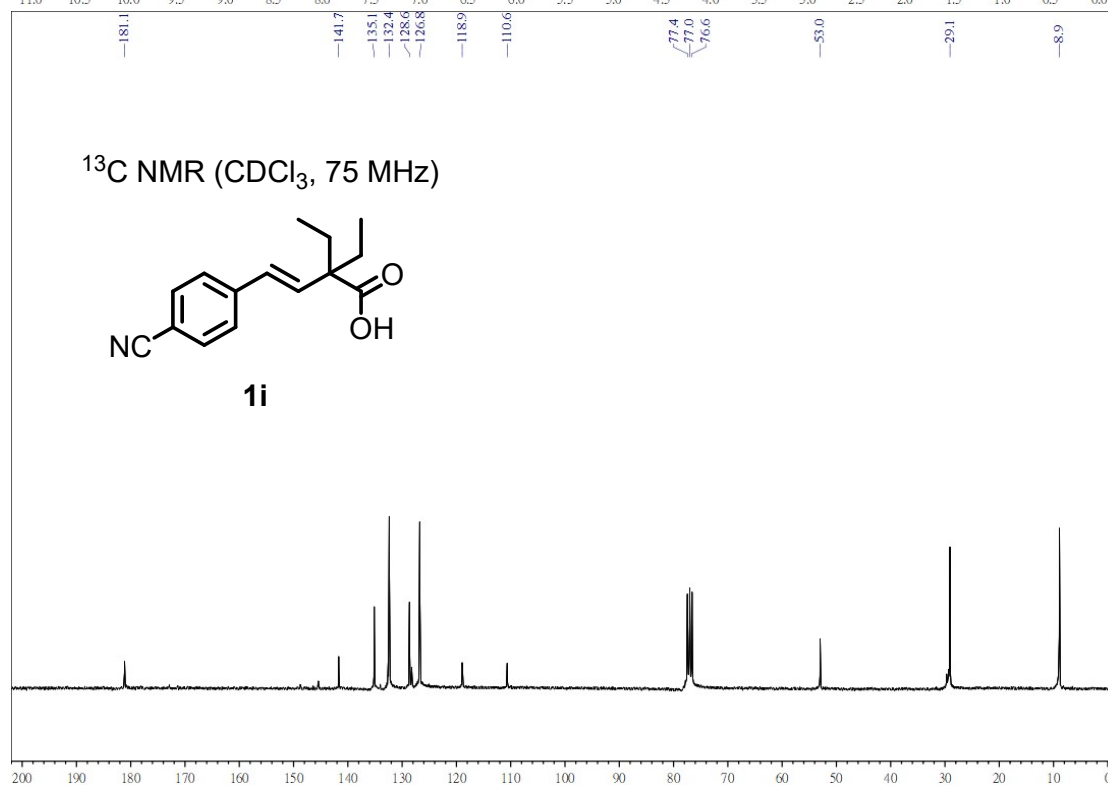

<sup>1</sup>H NMR (CDCl<sub>3</sub>, 300 MHz)

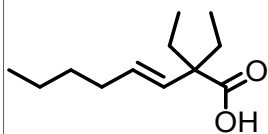

**1k**

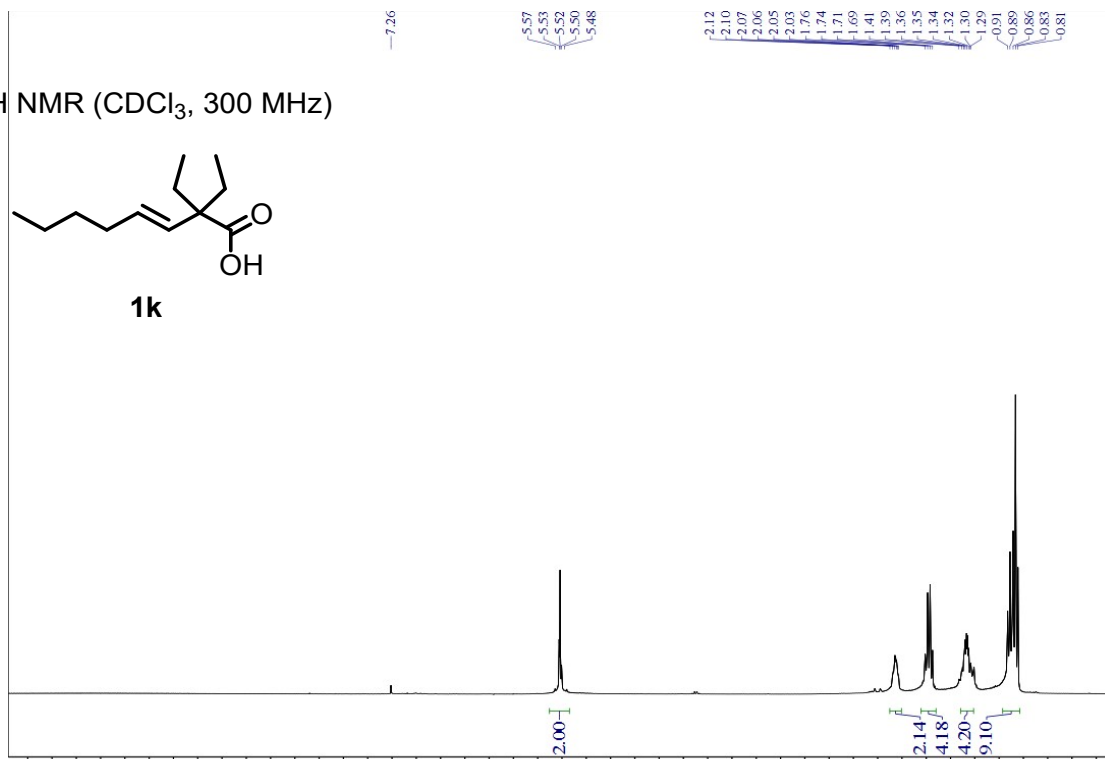

<sup>13</sup>C NMR (CDCl<sub>3</sub>, 75 MHz)

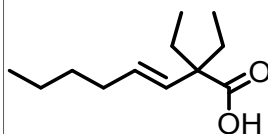

**1k**

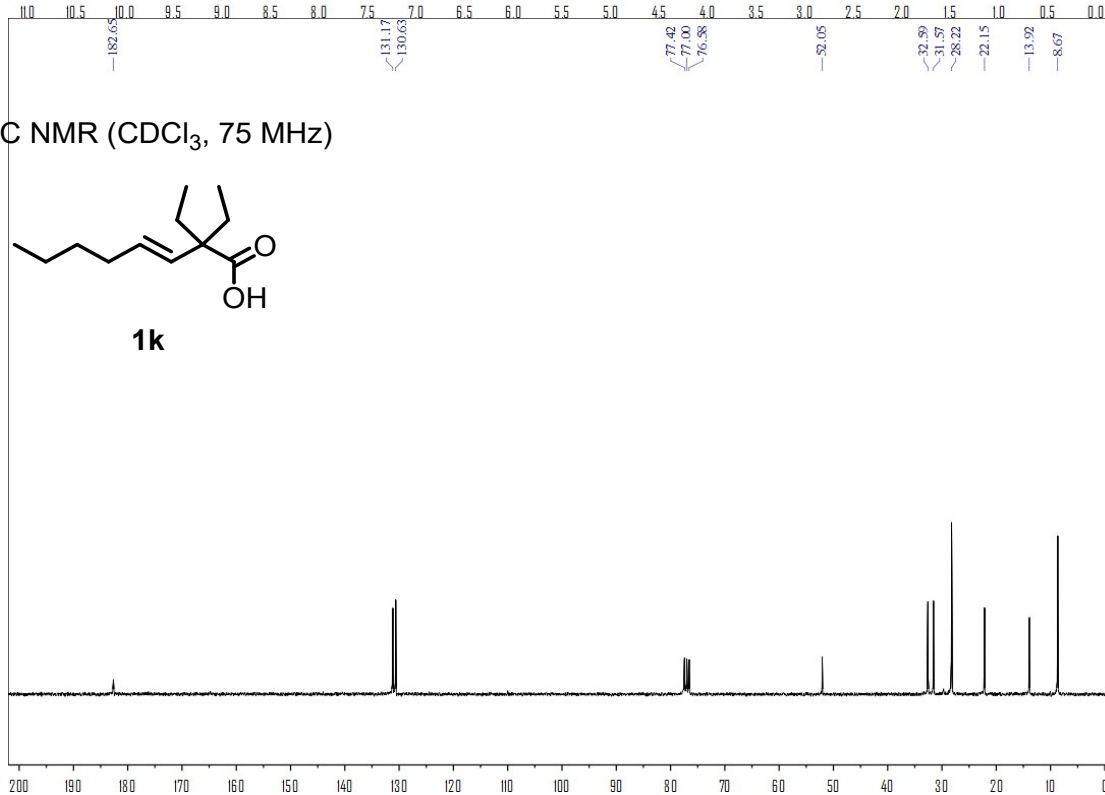

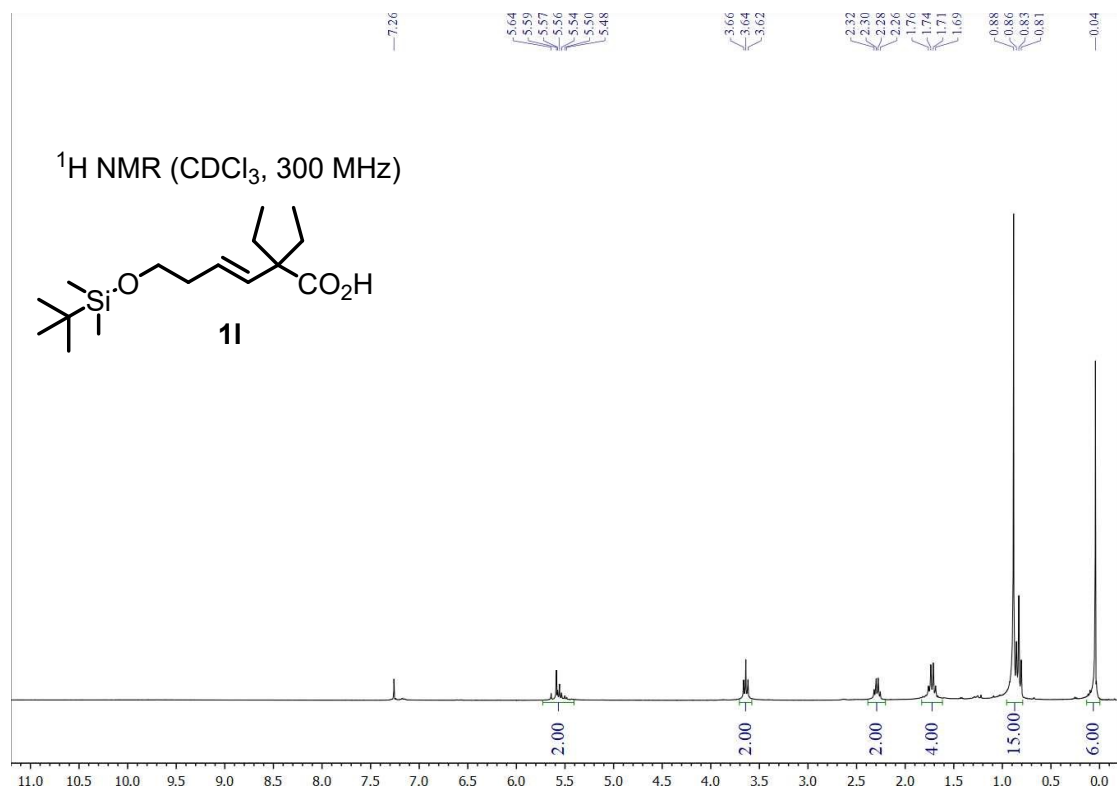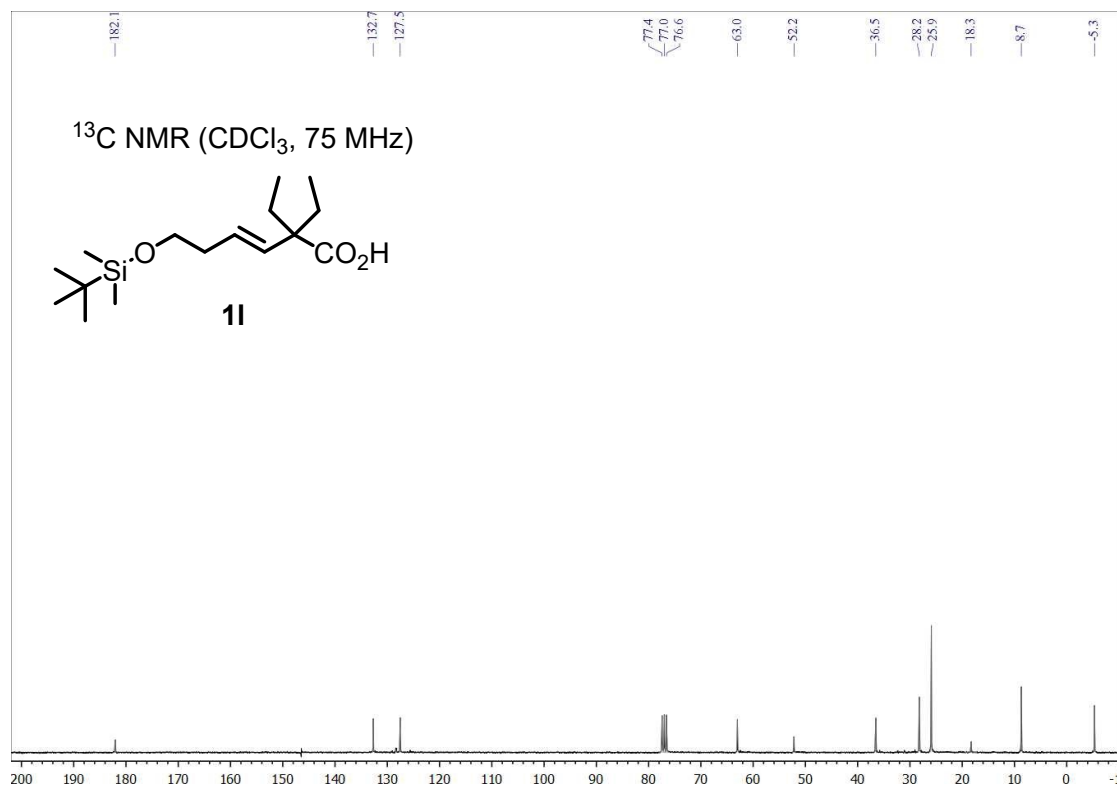



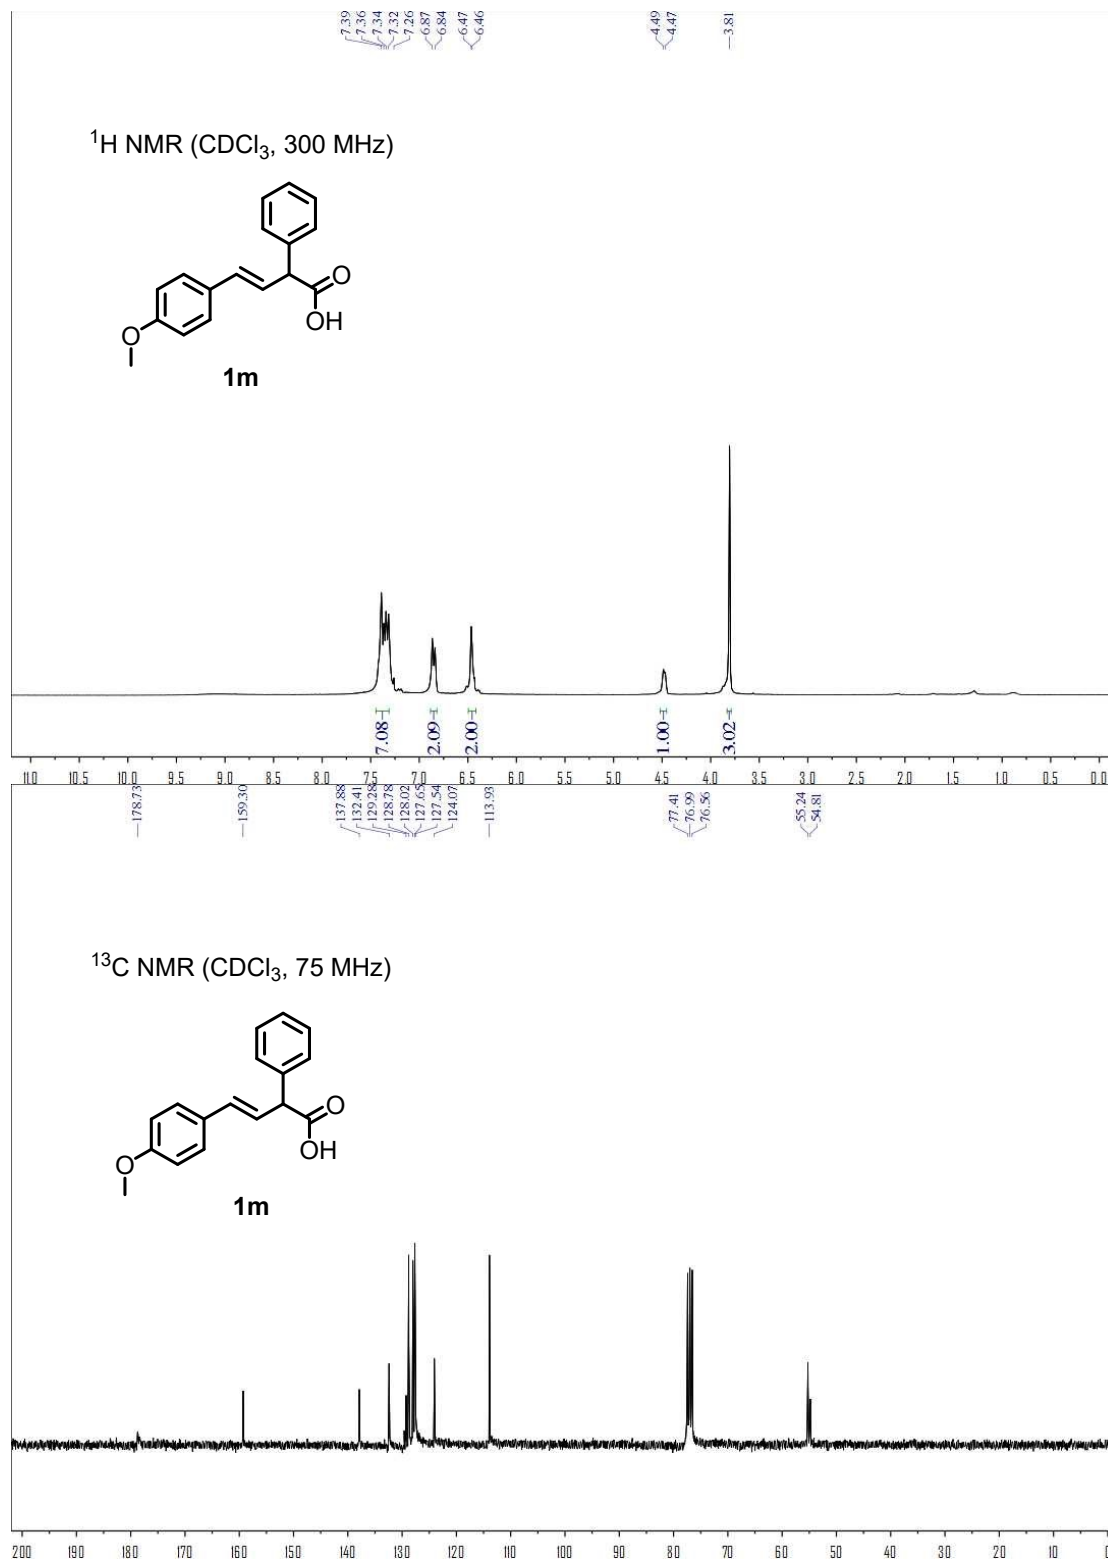

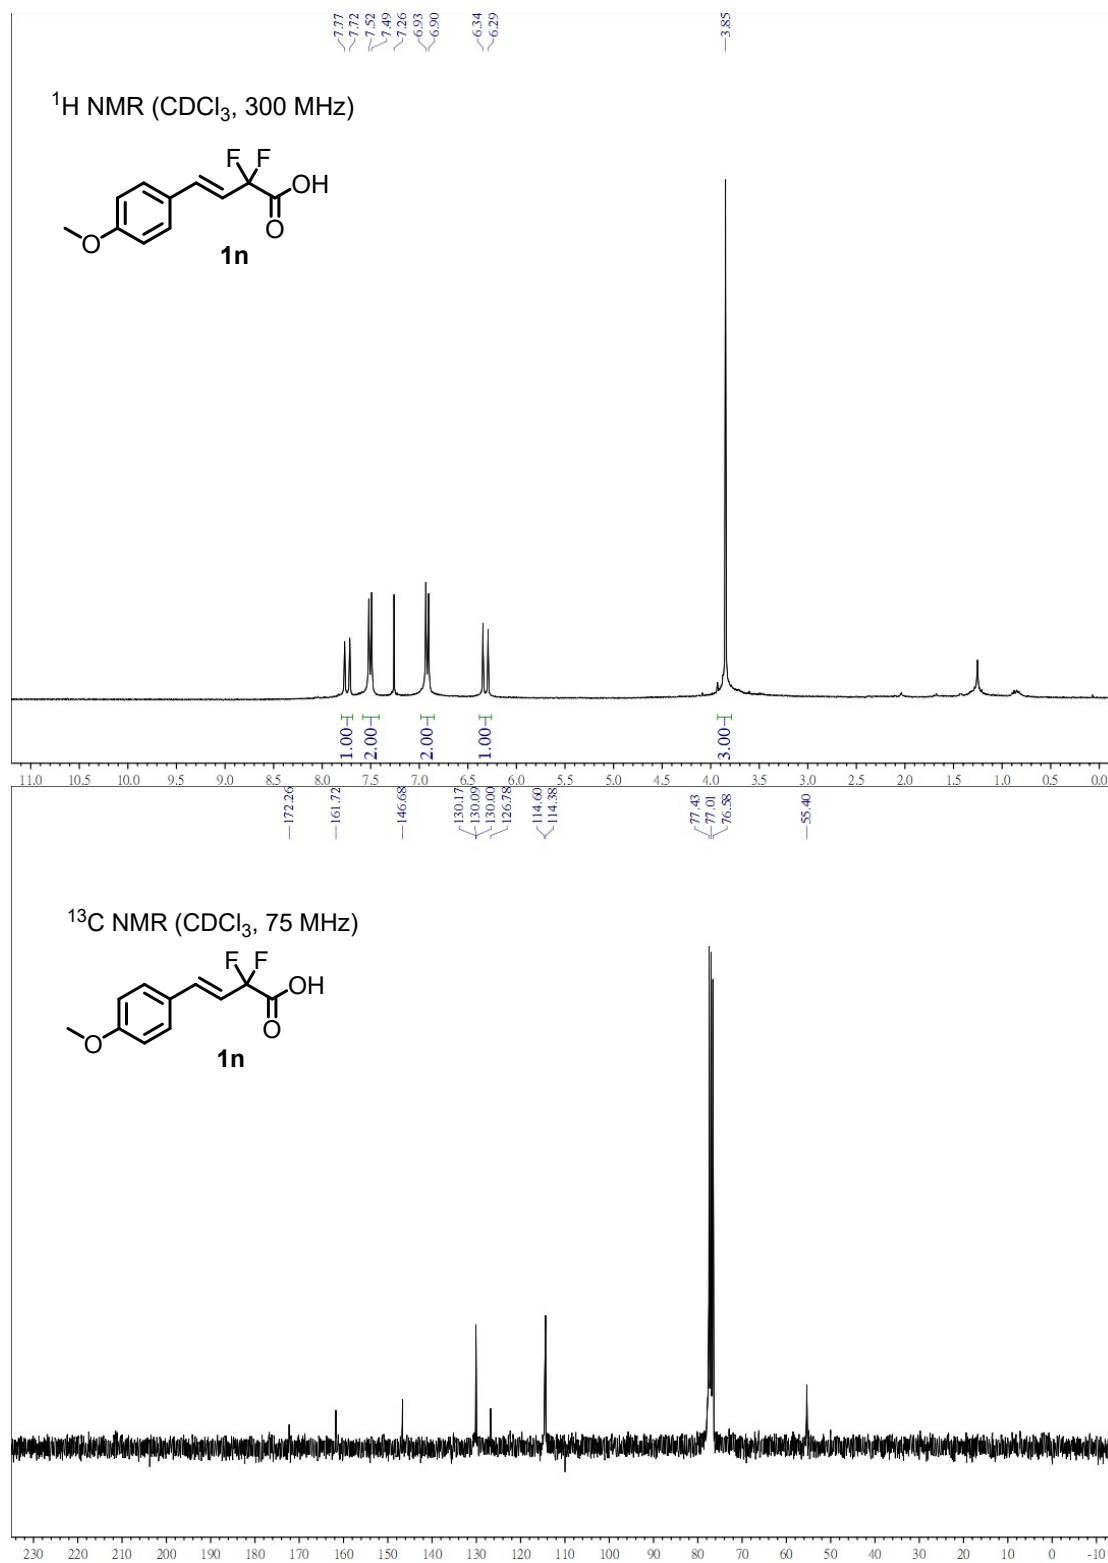

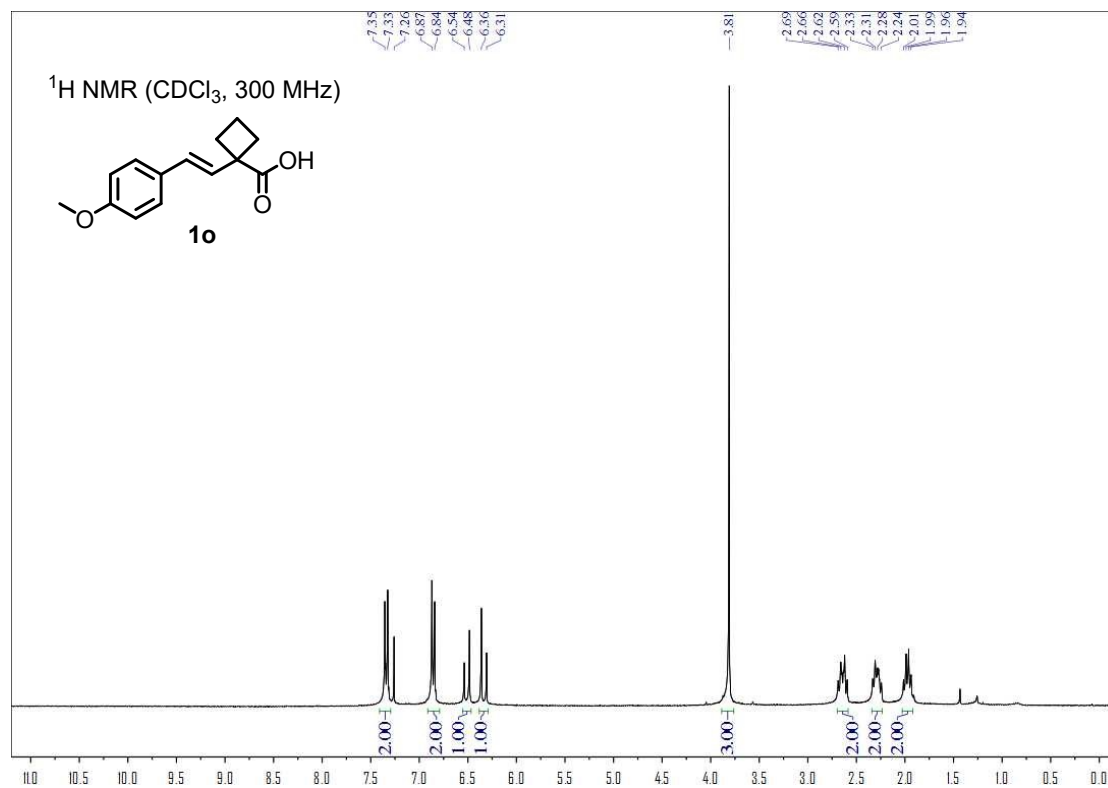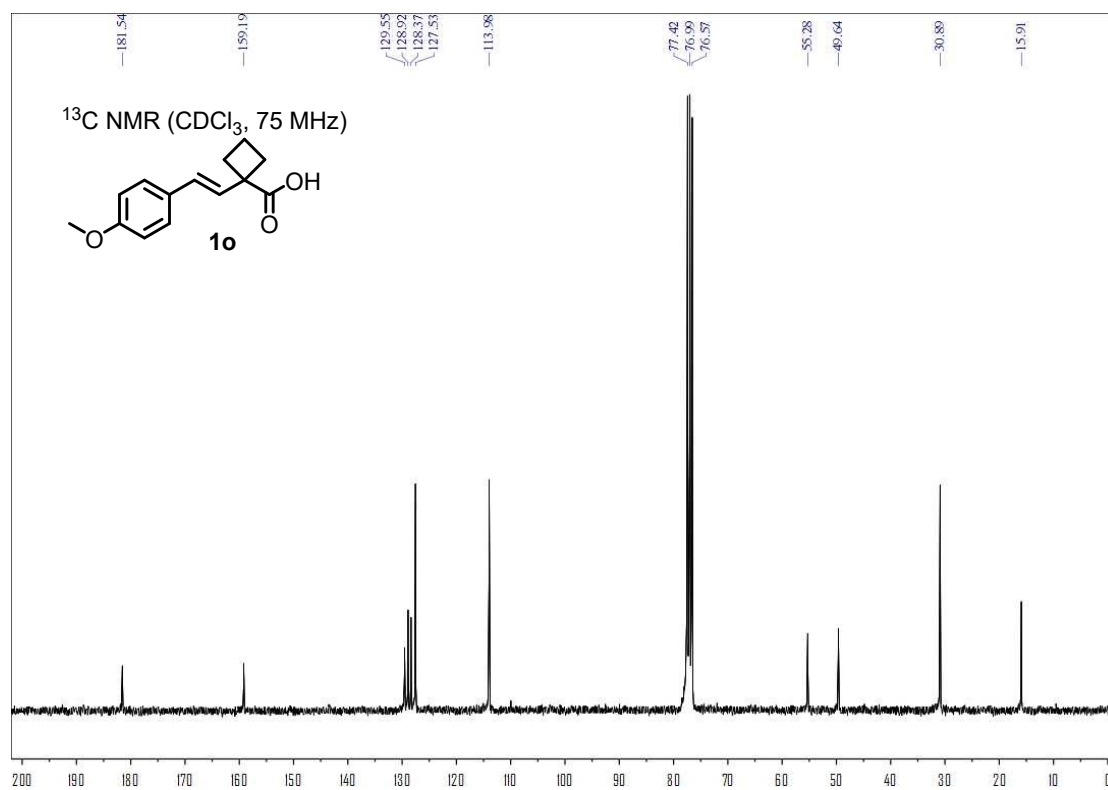

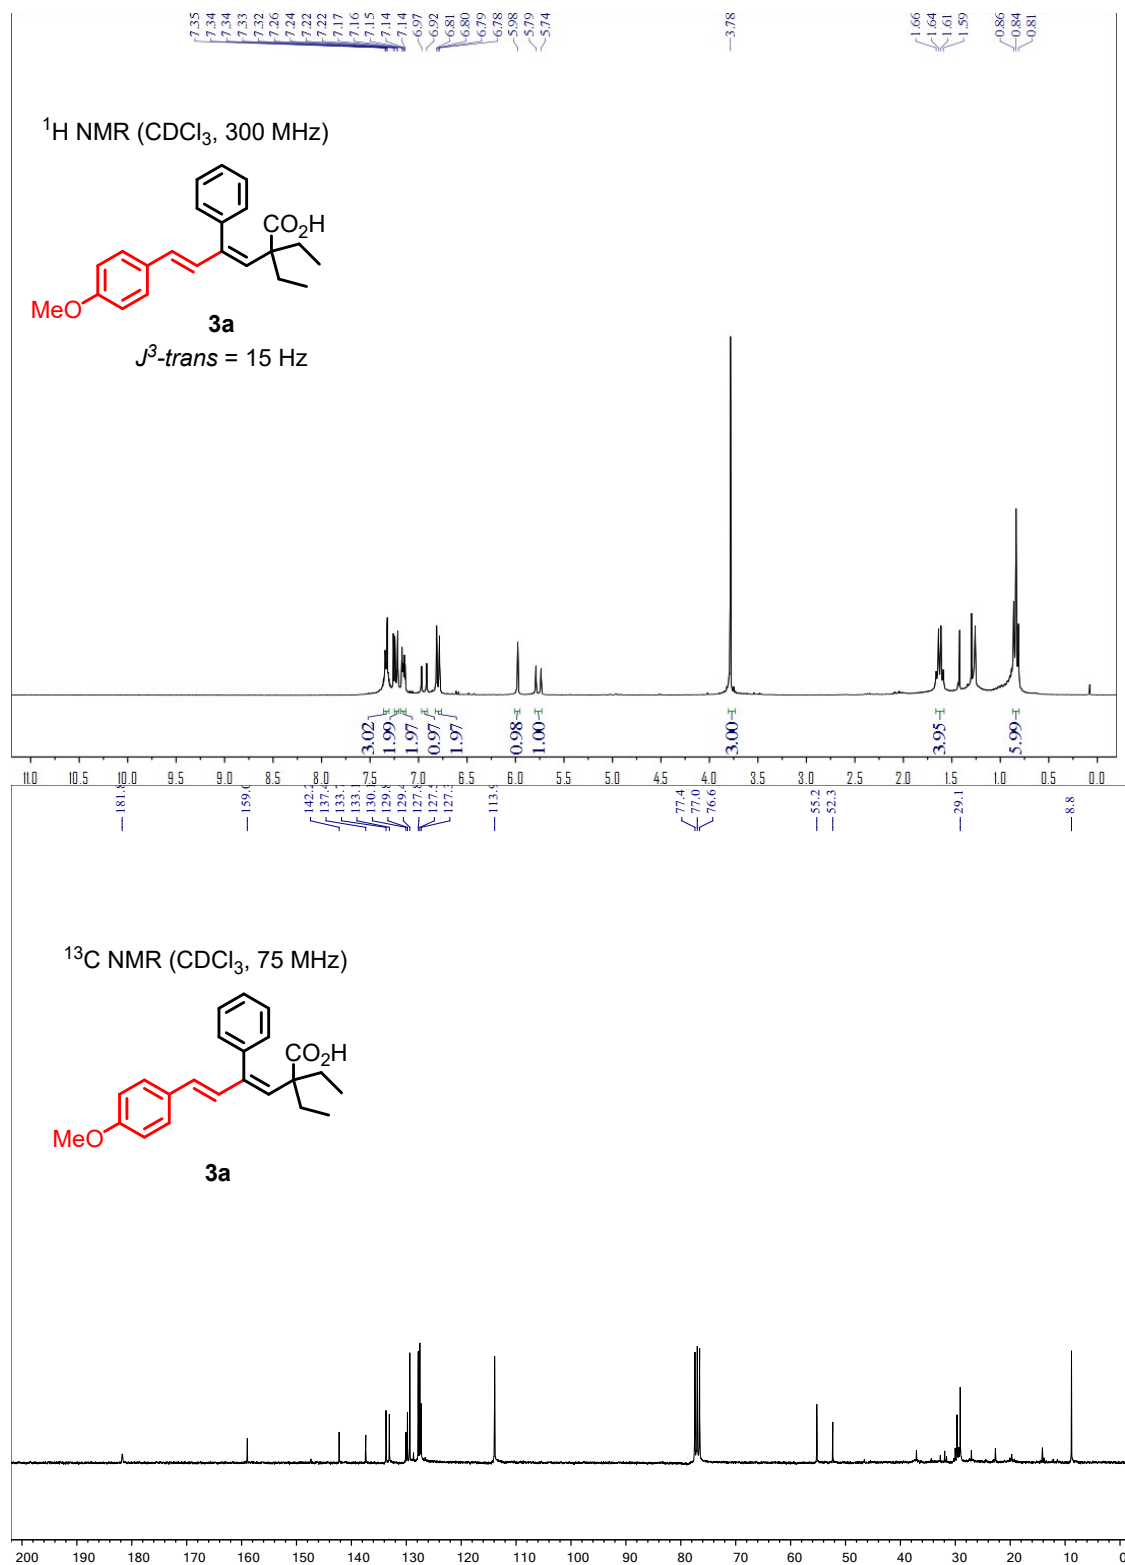

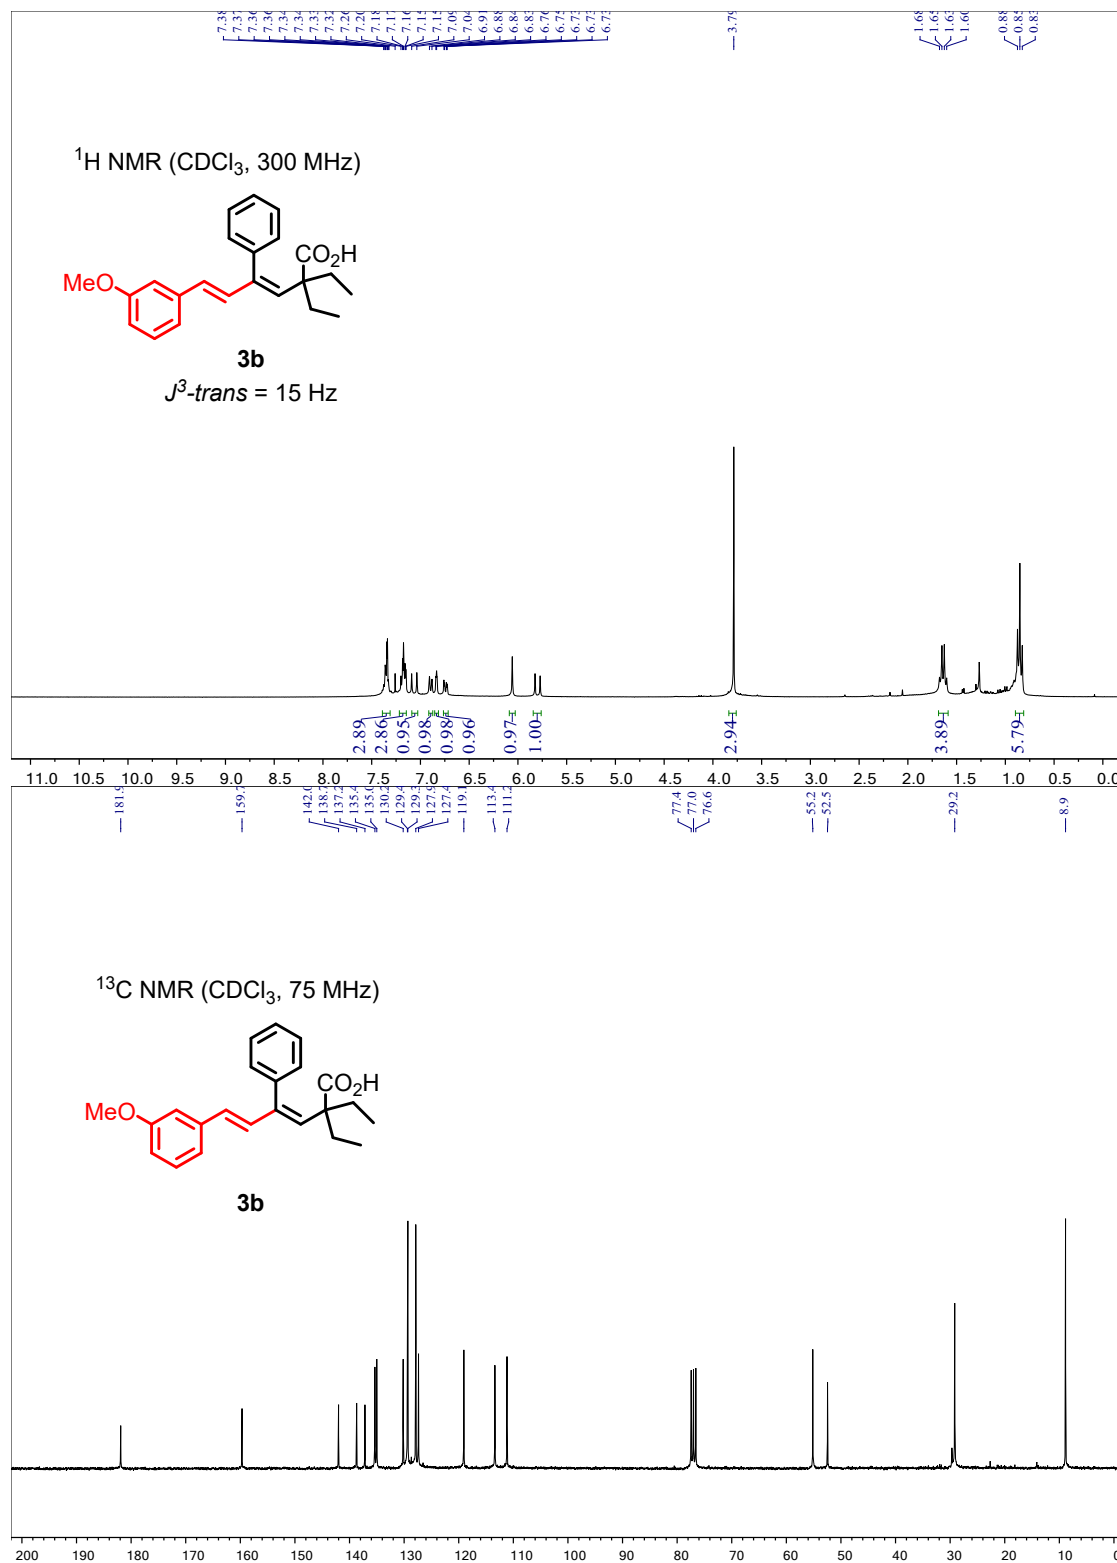

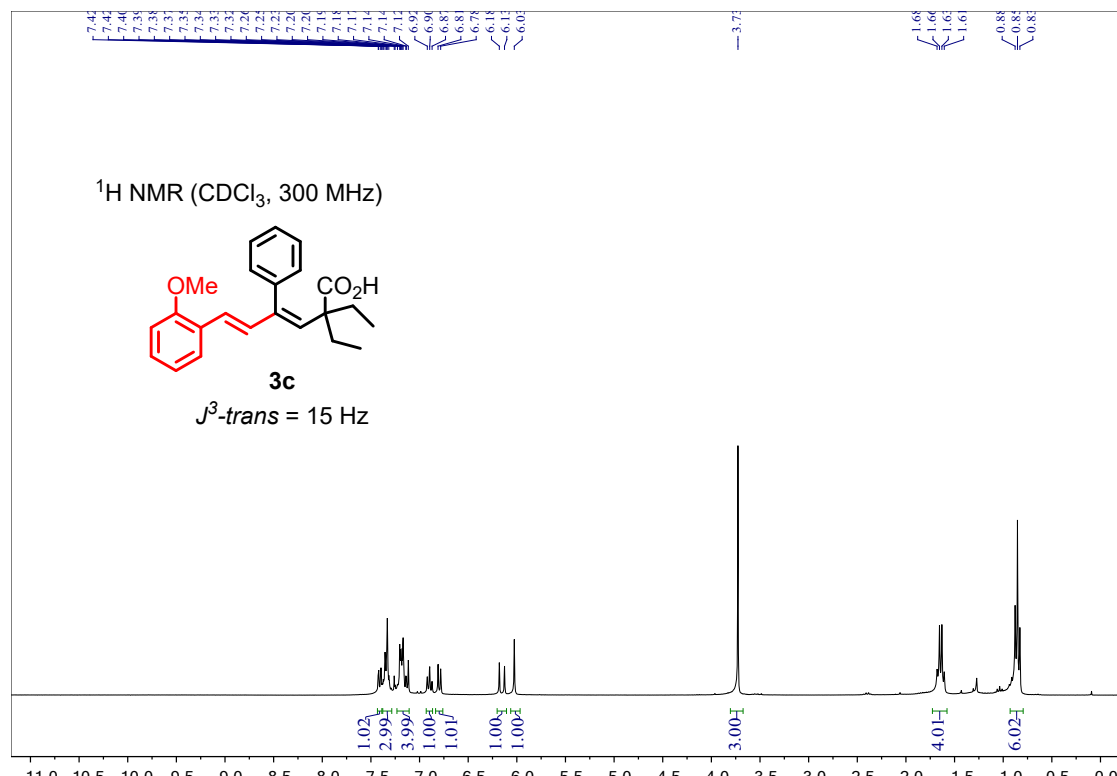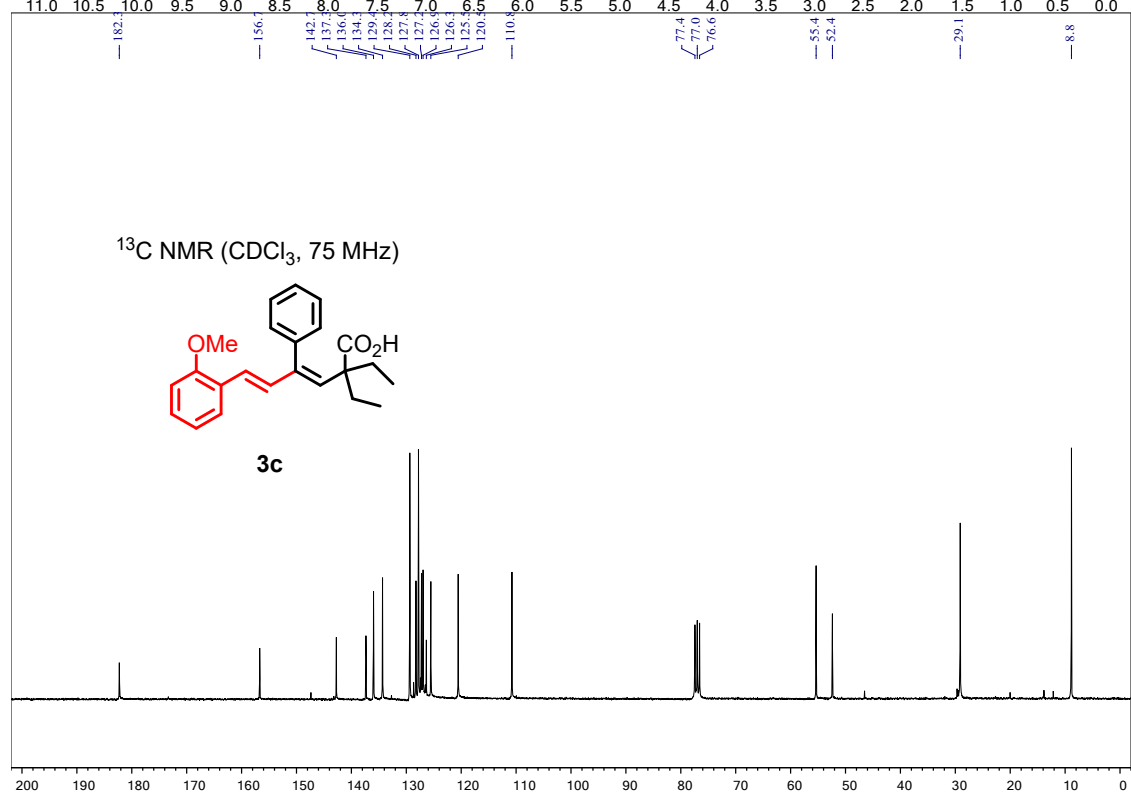

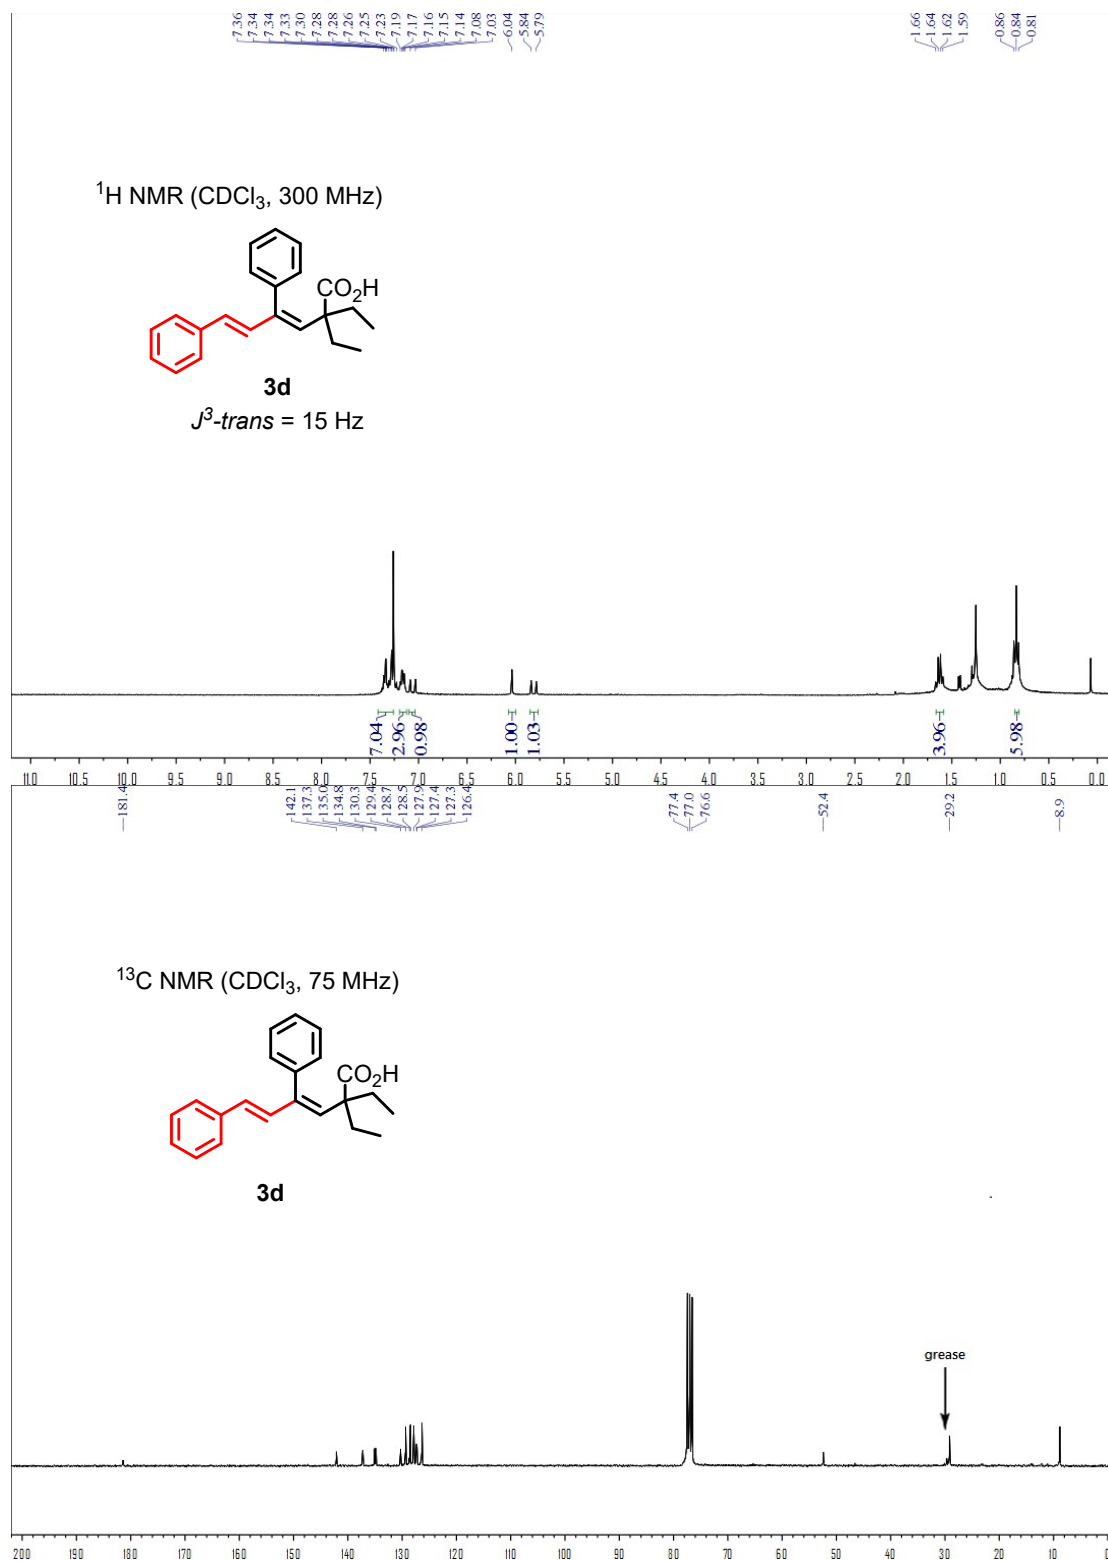

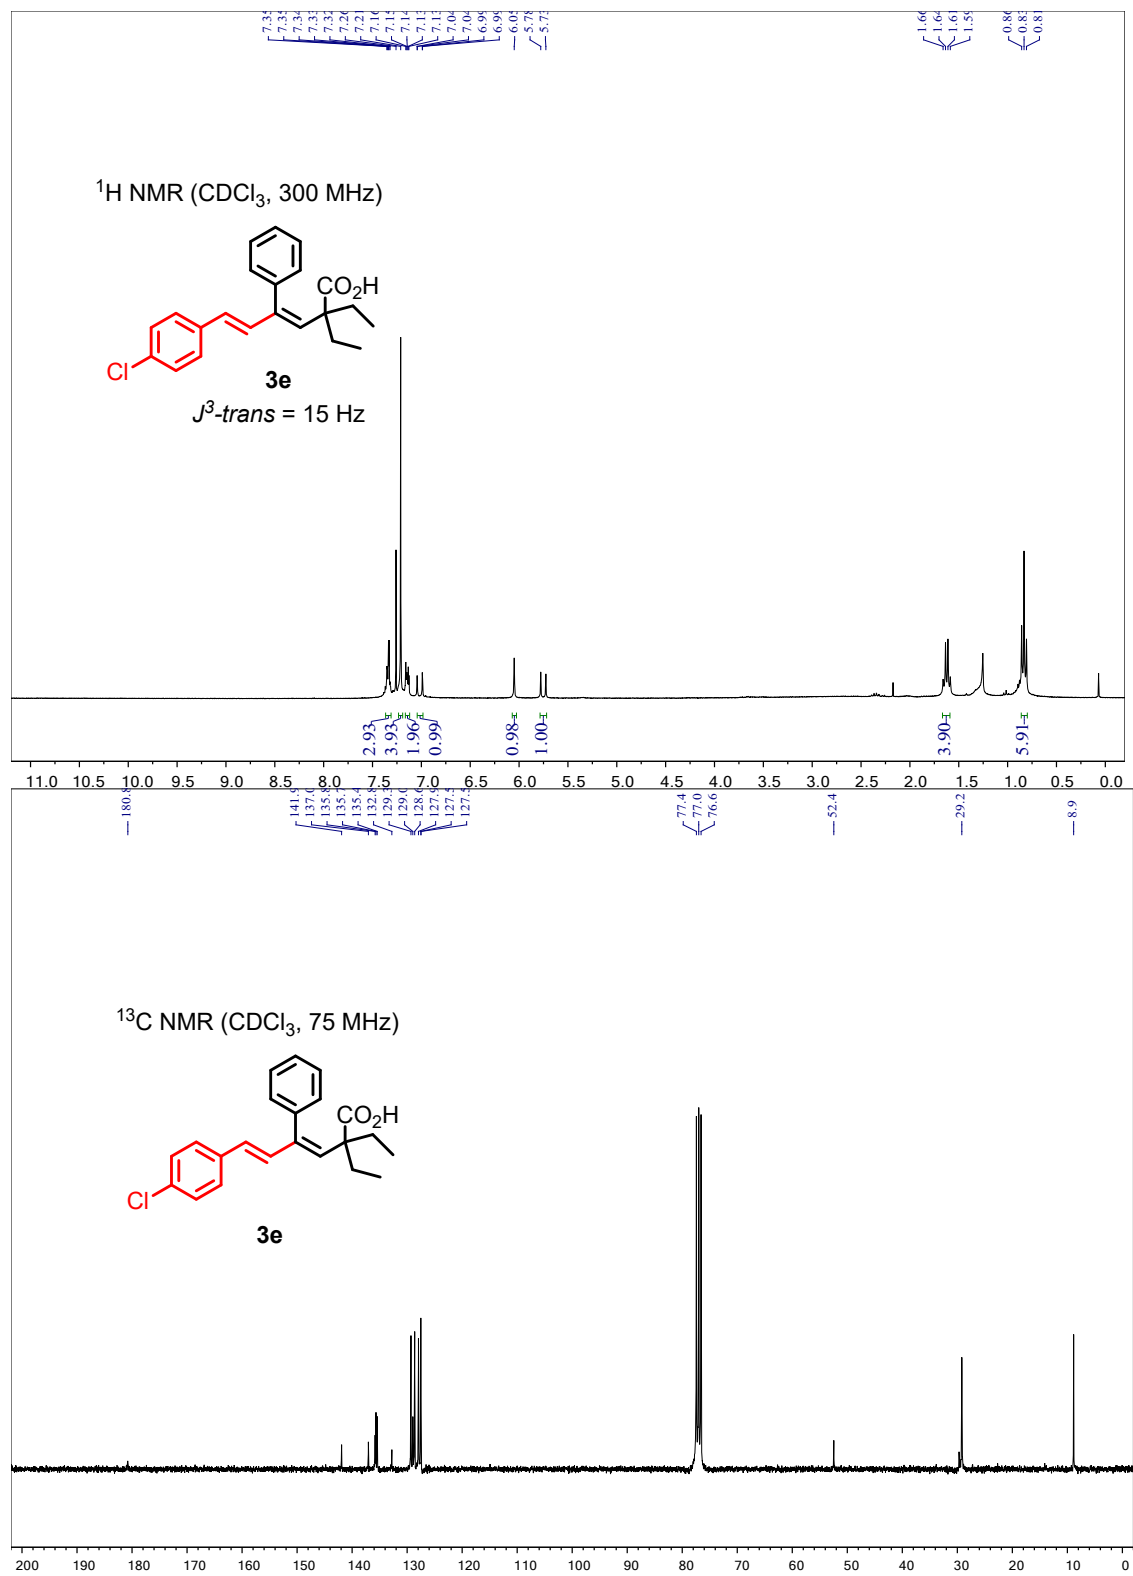



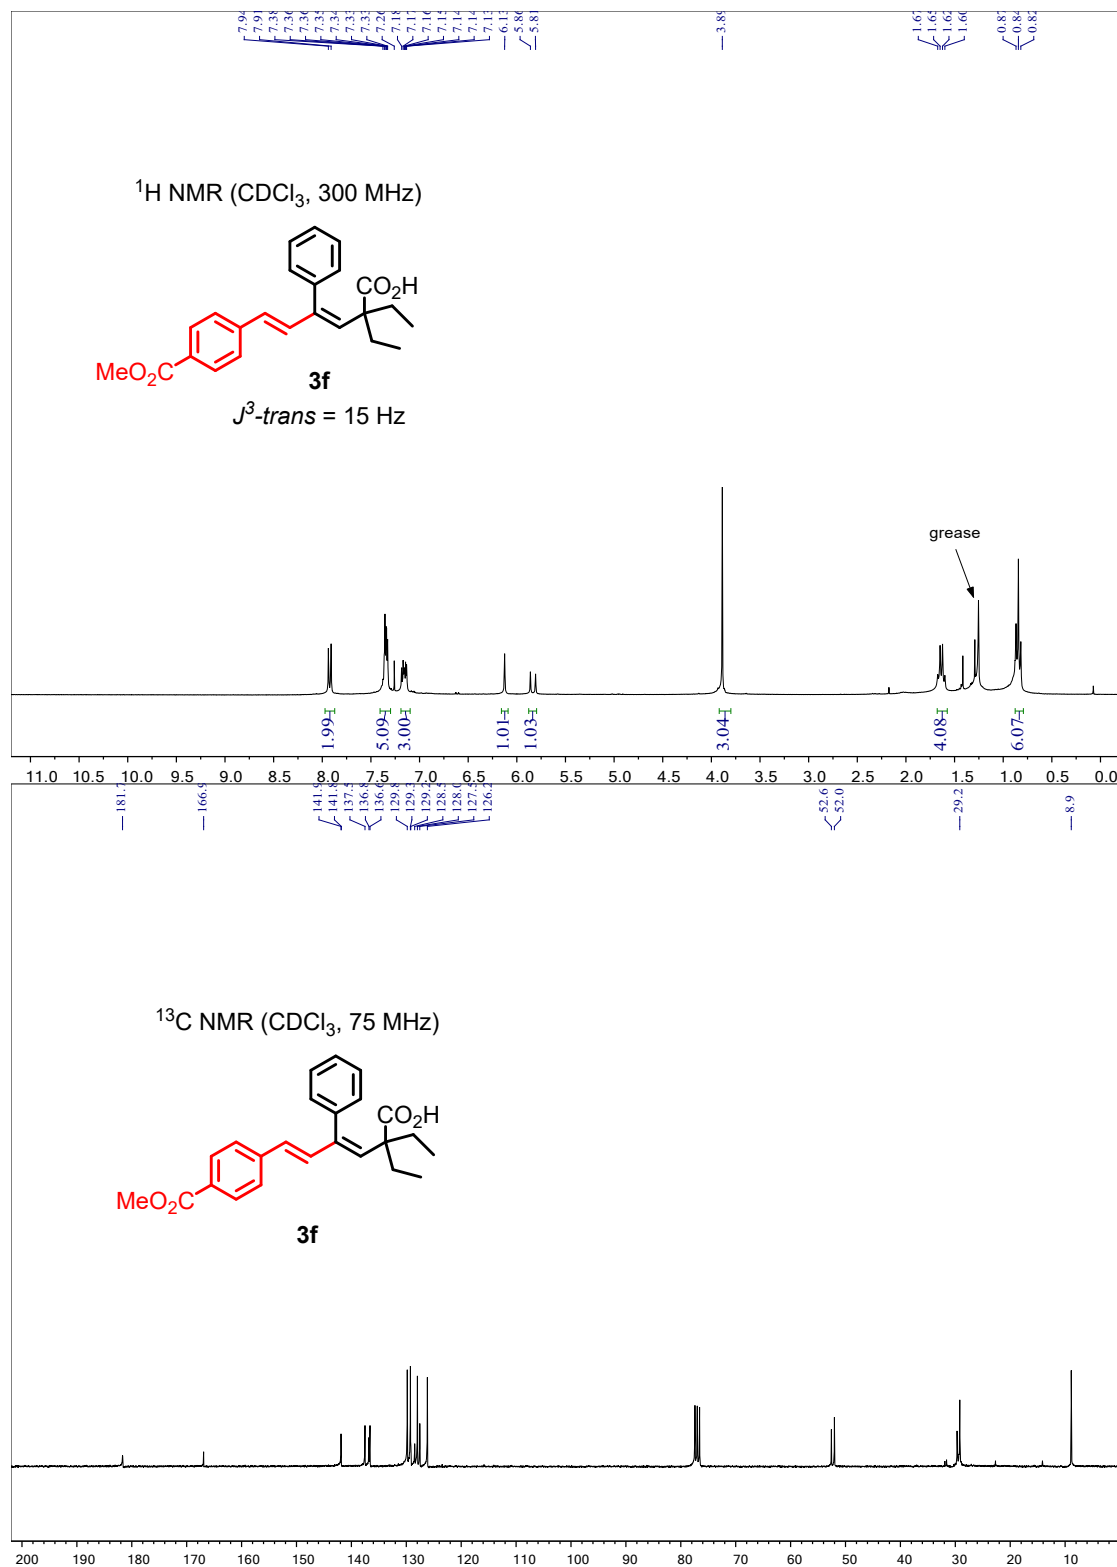

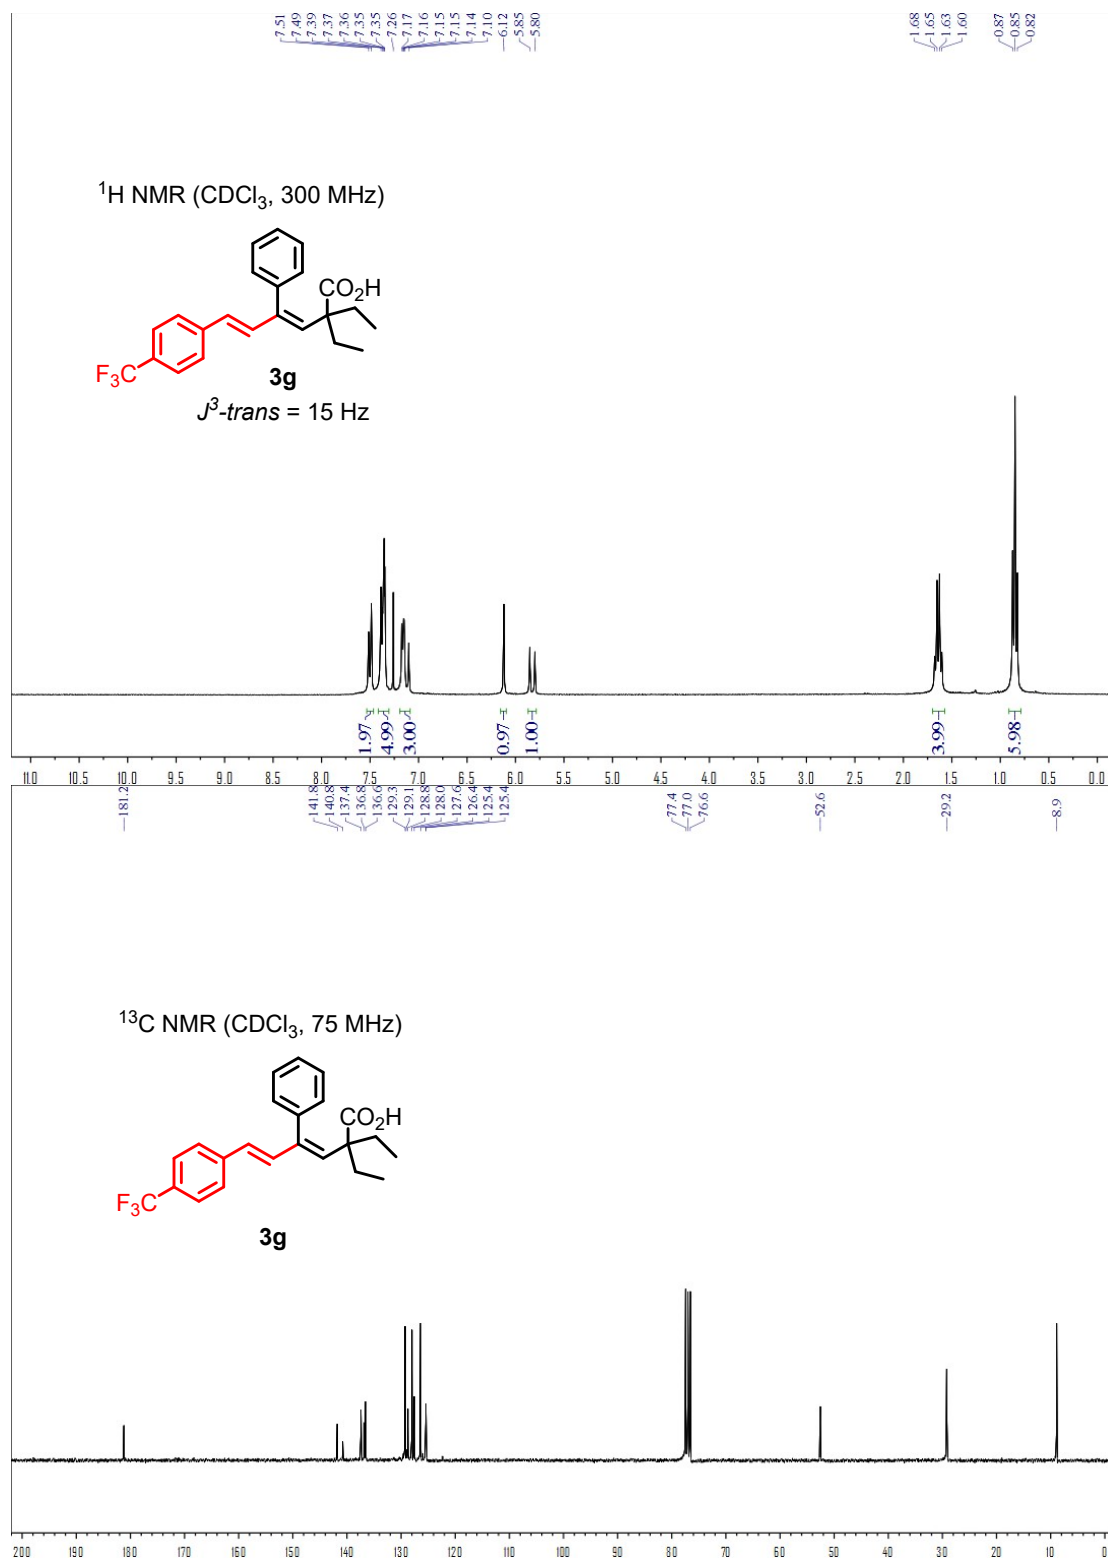

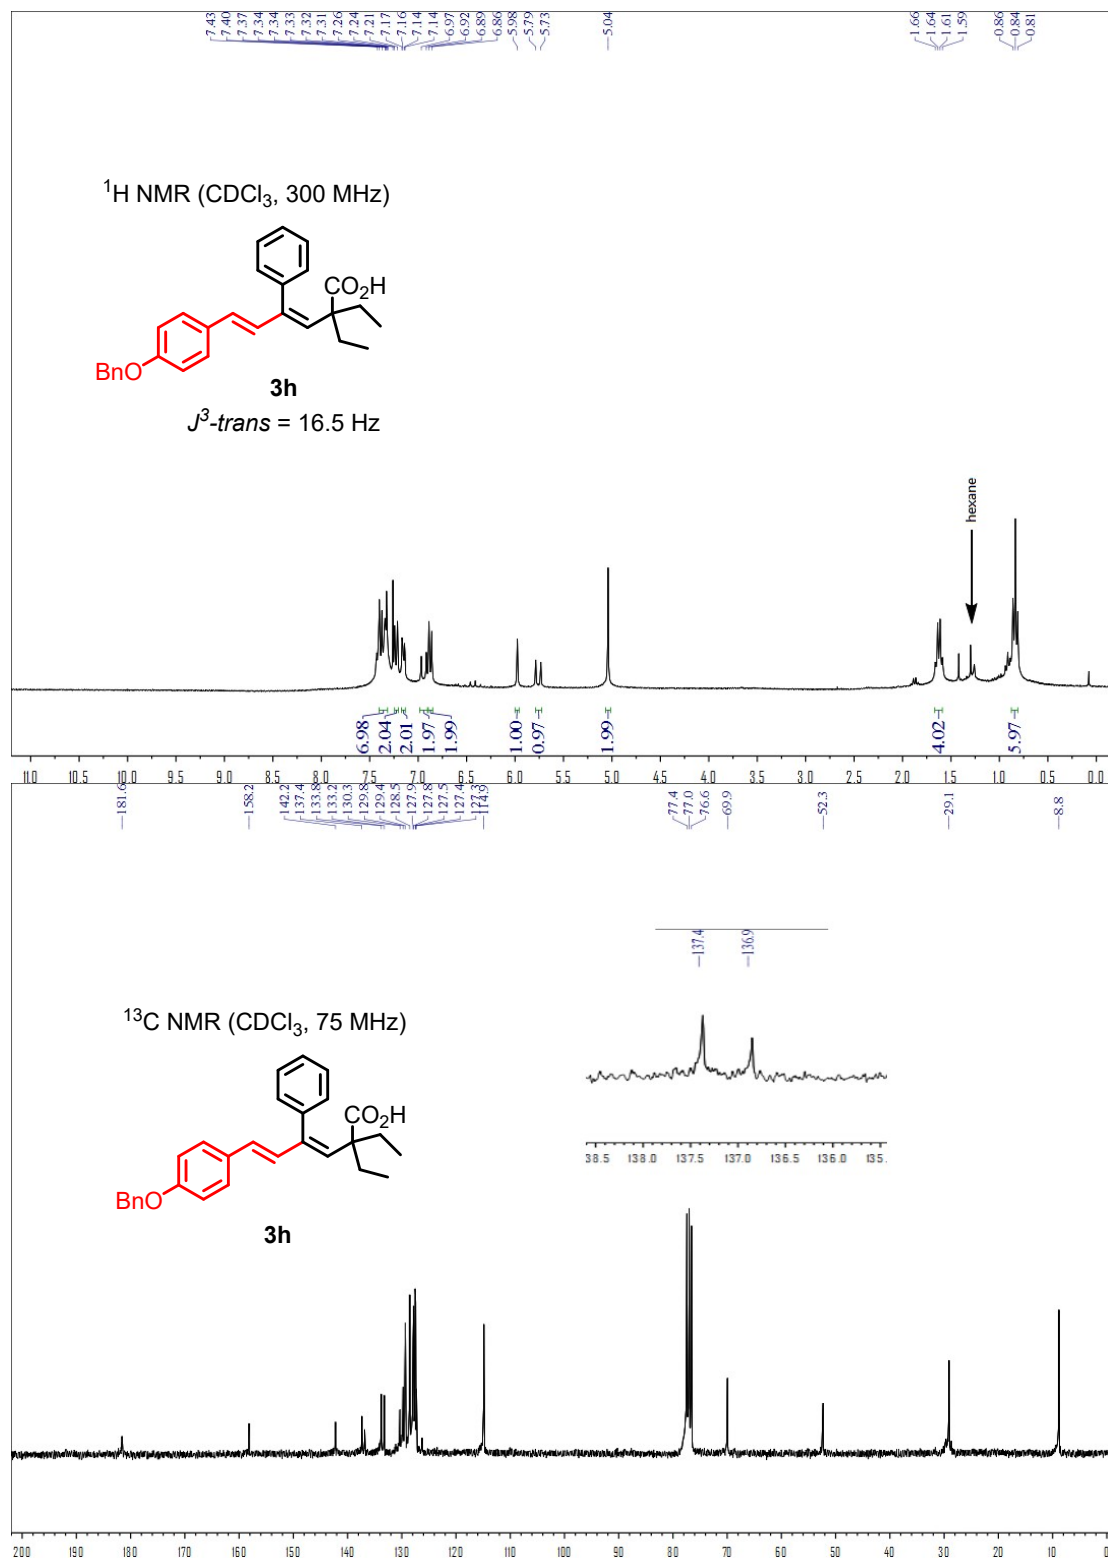

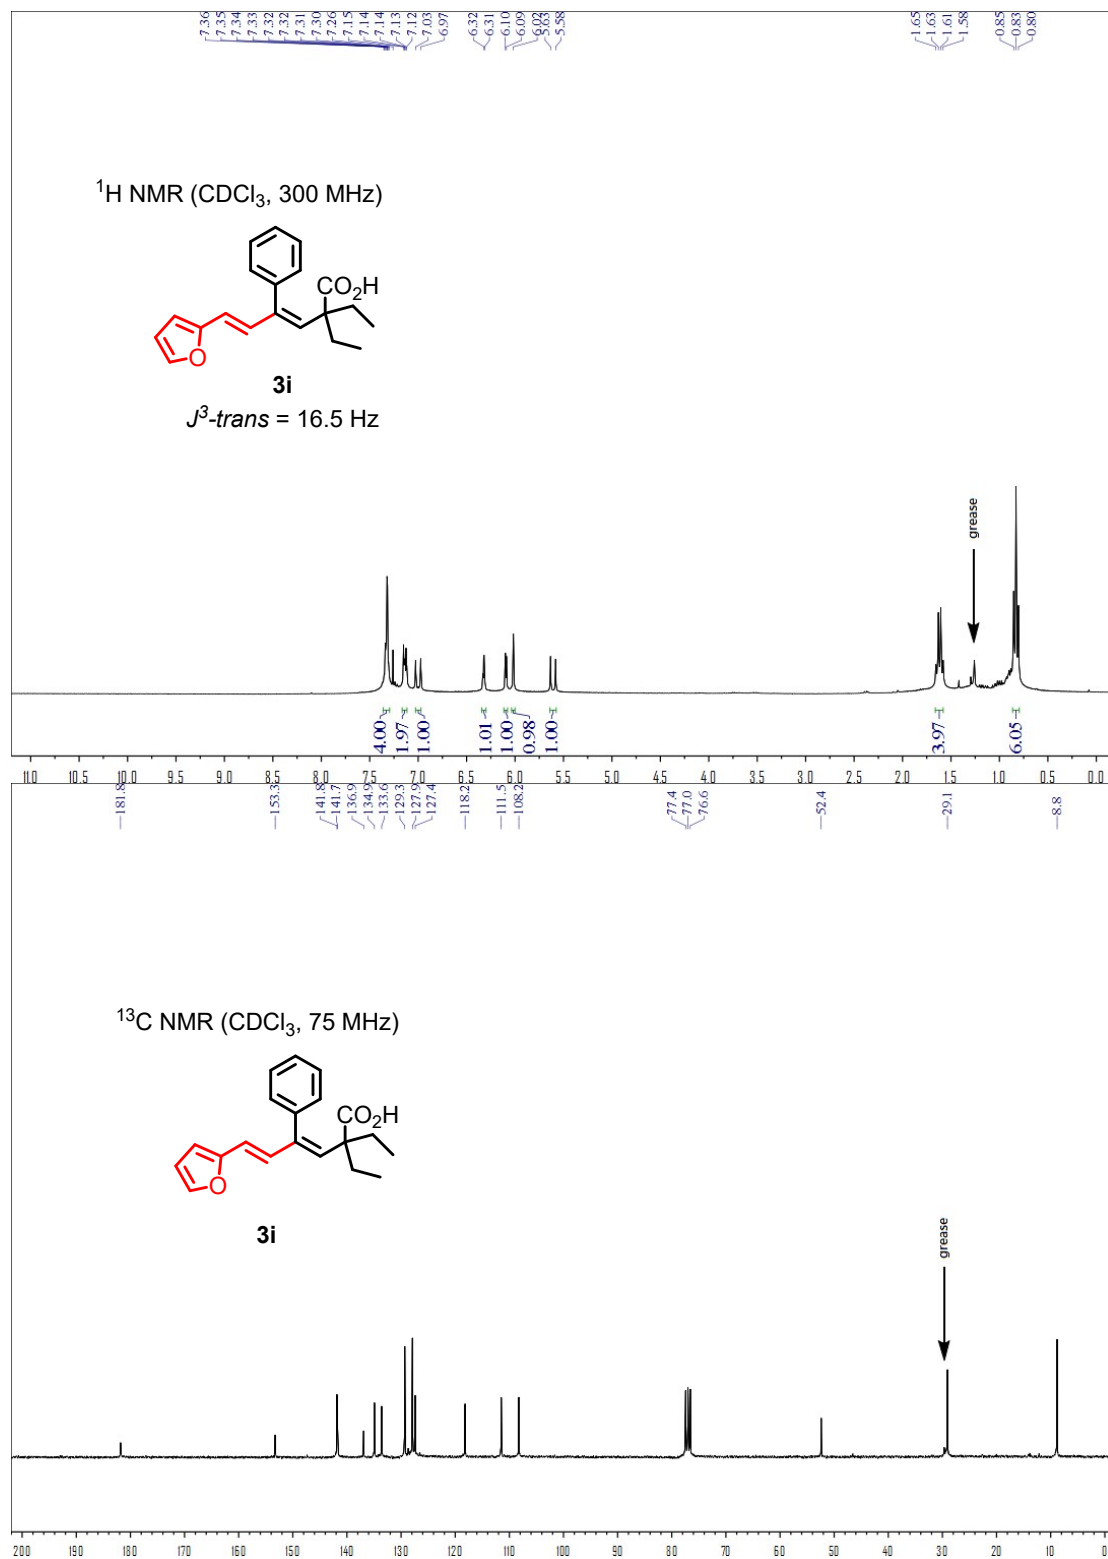

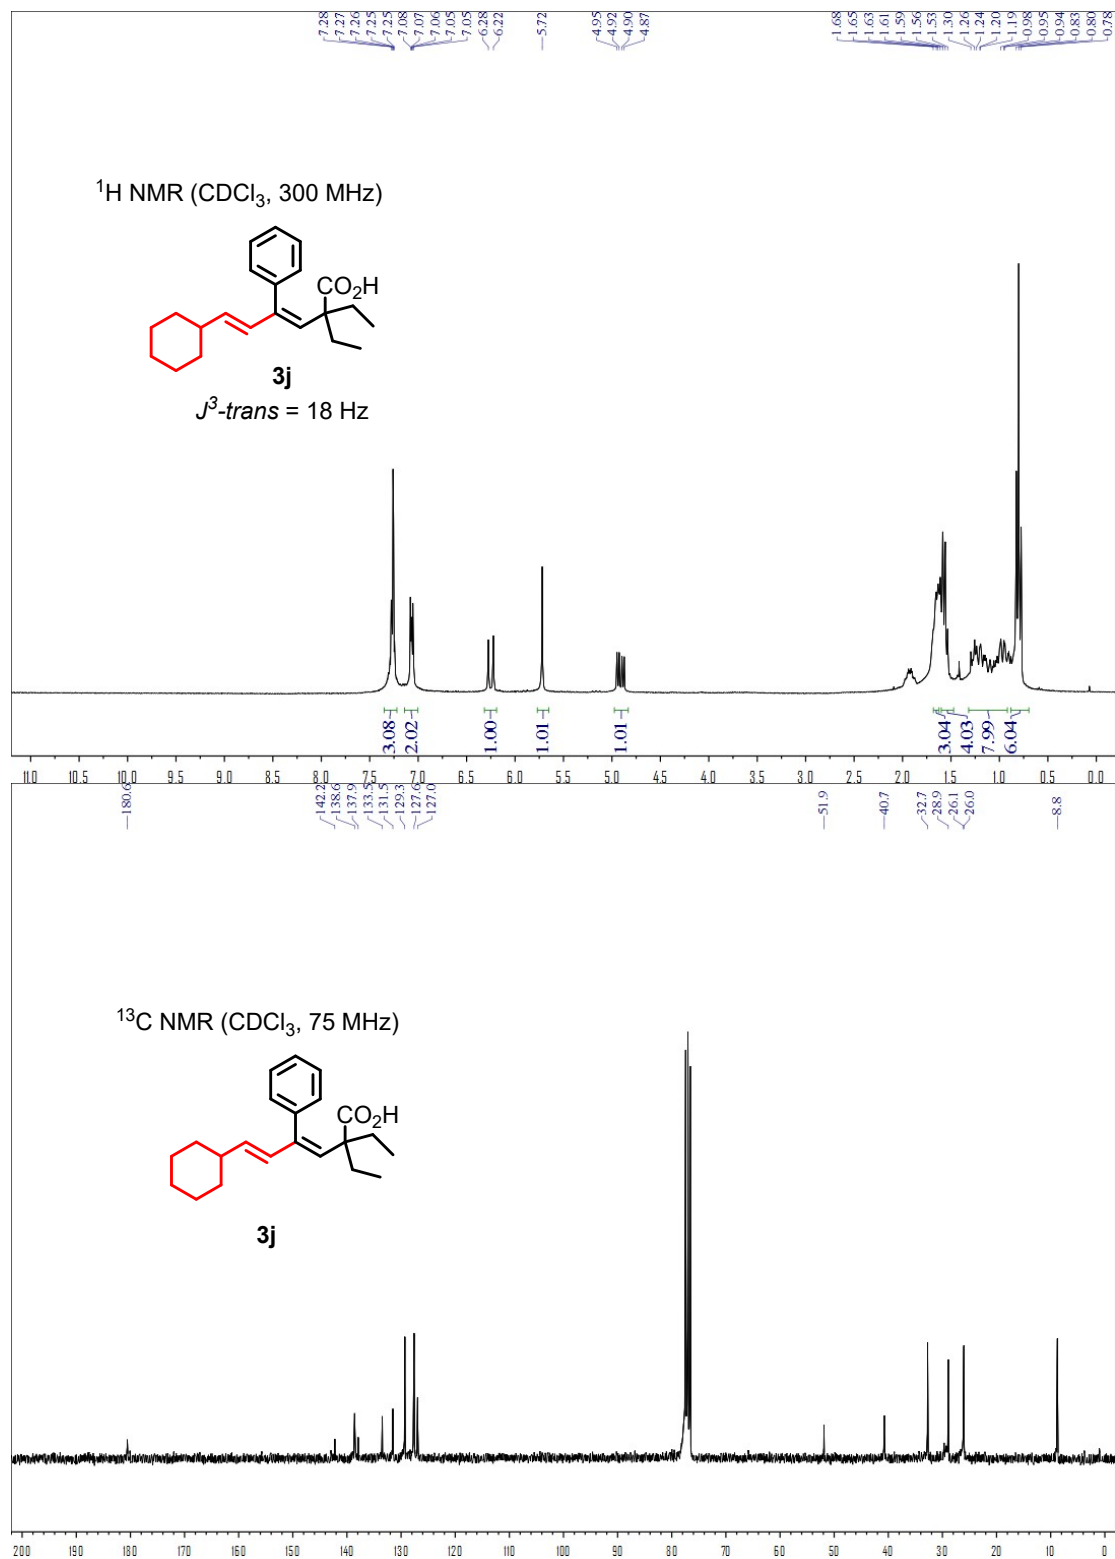

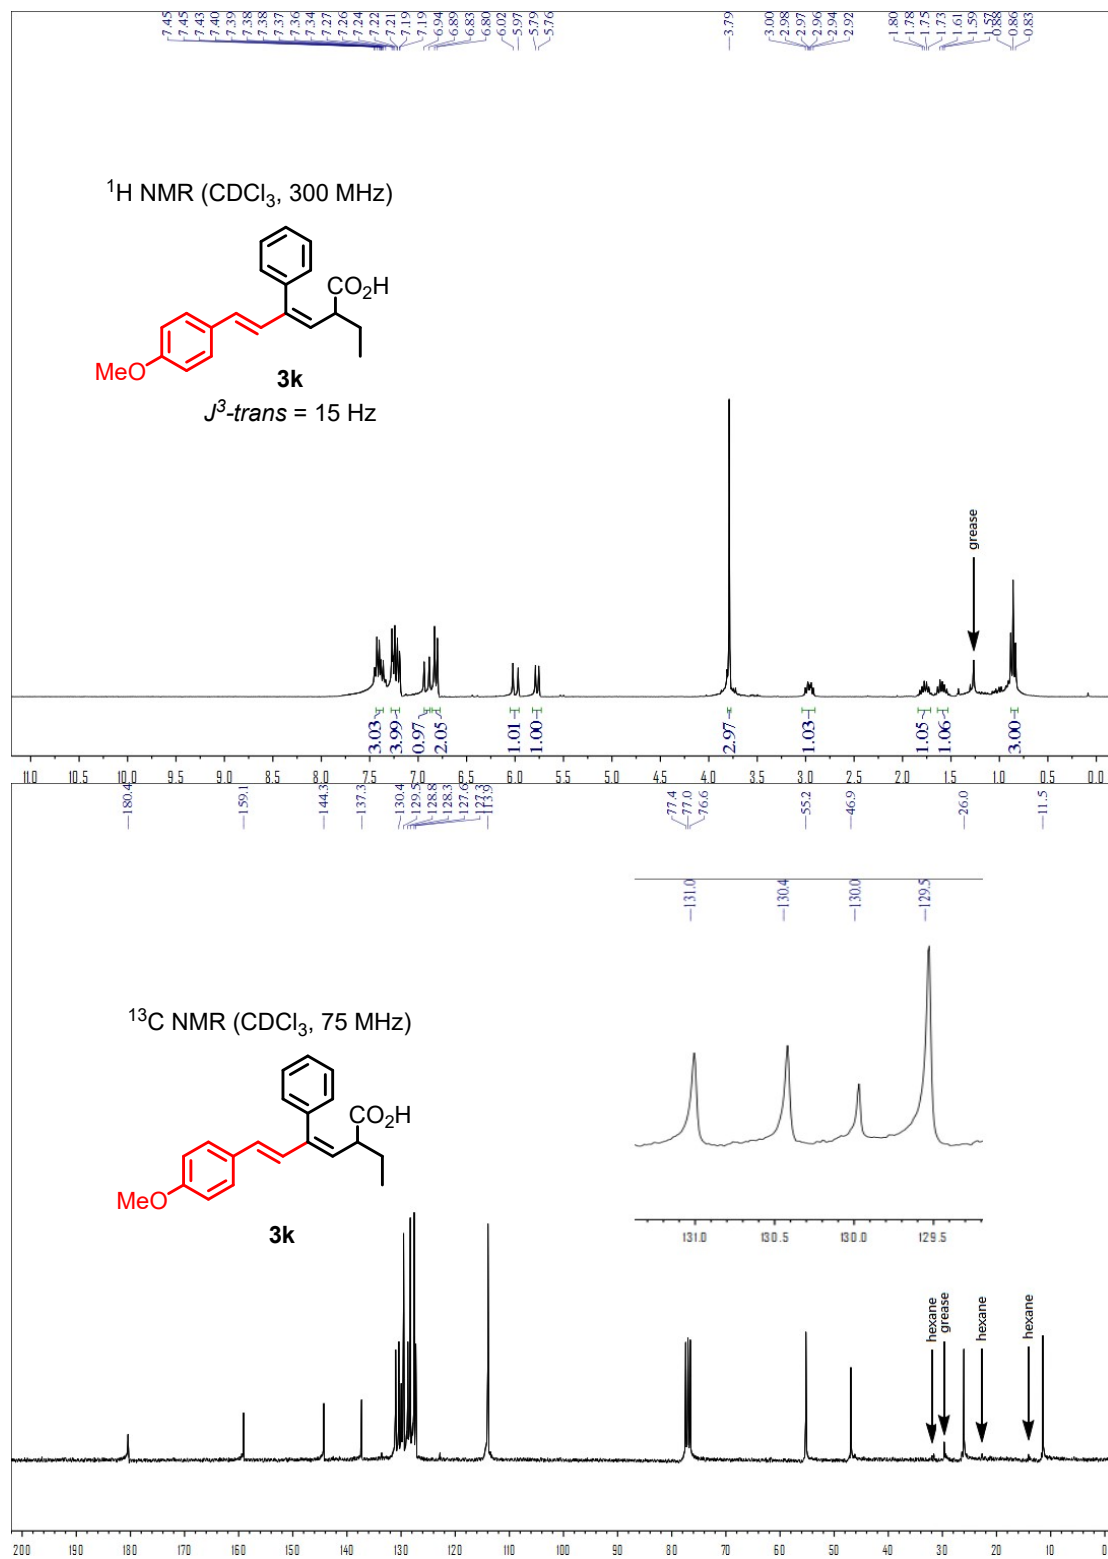

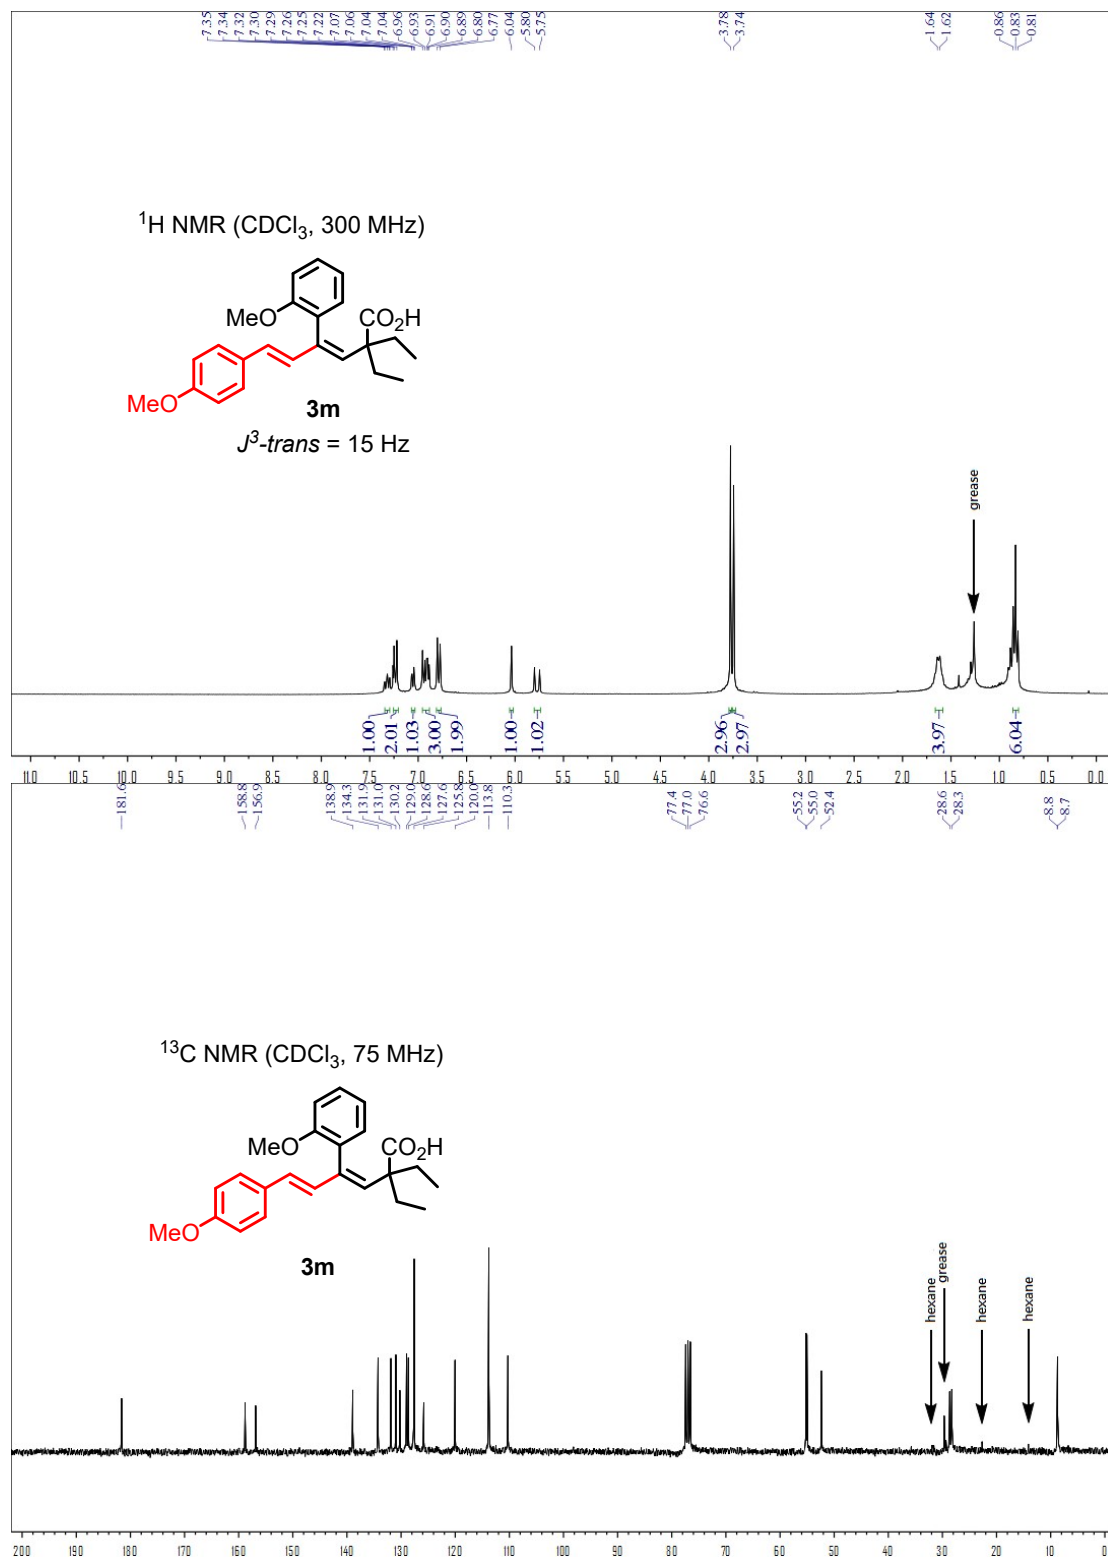

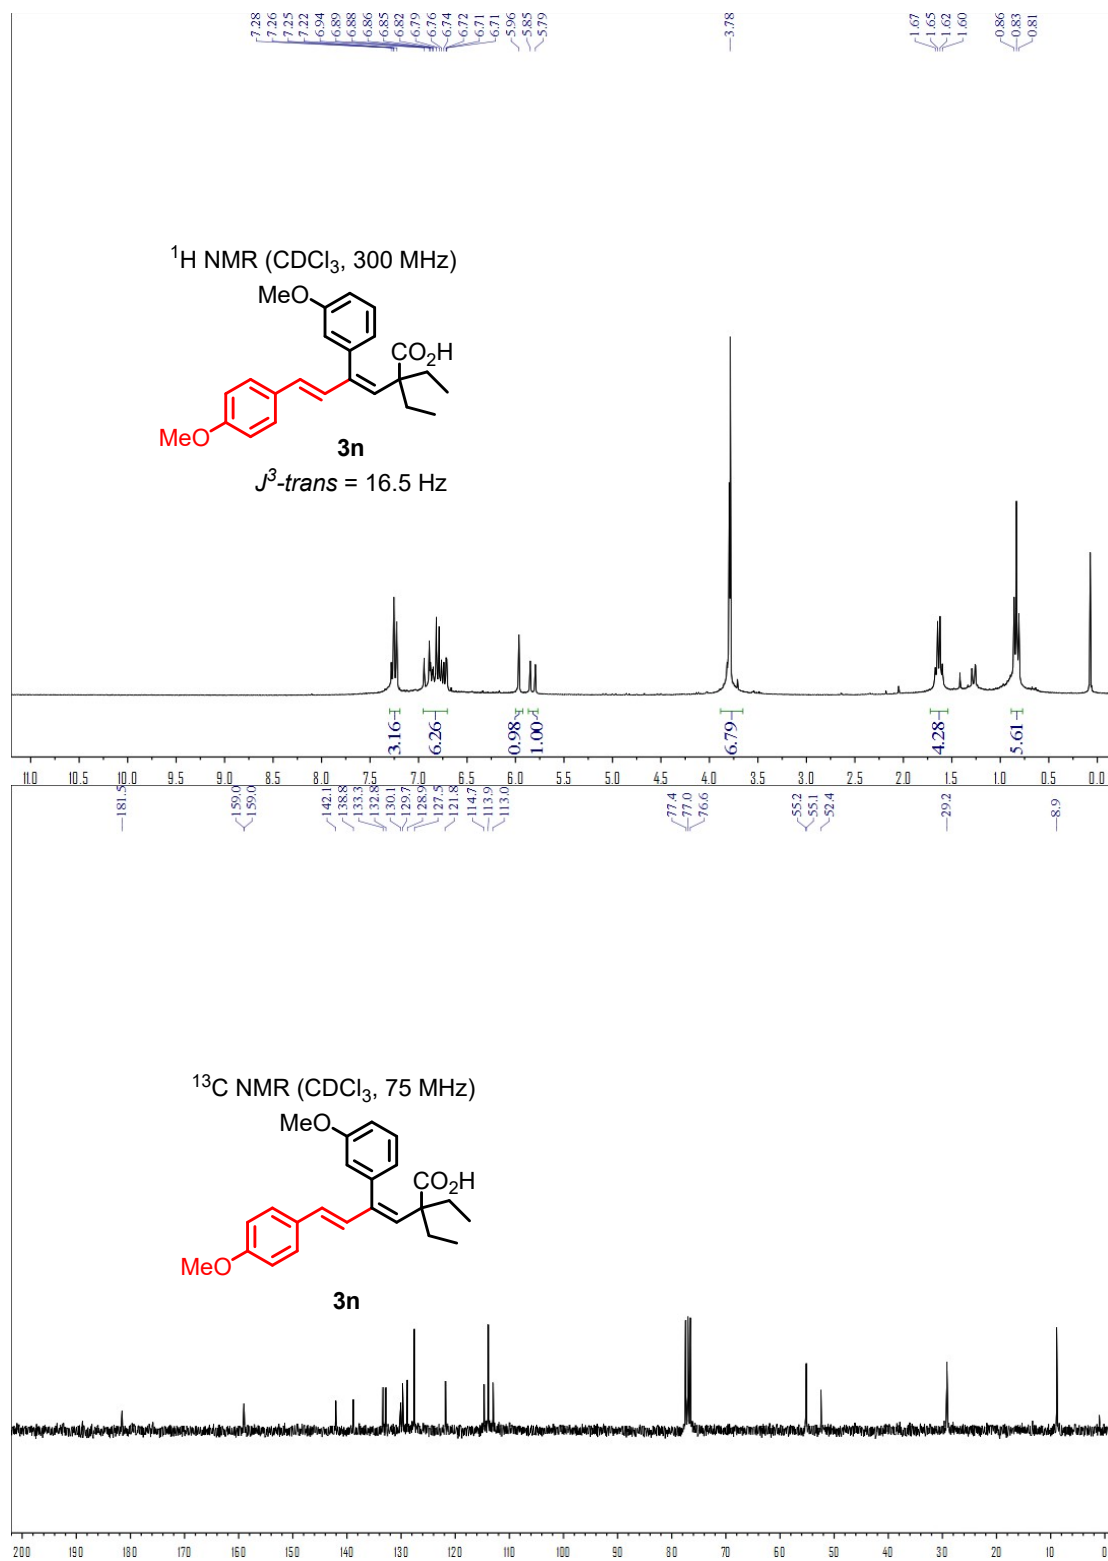



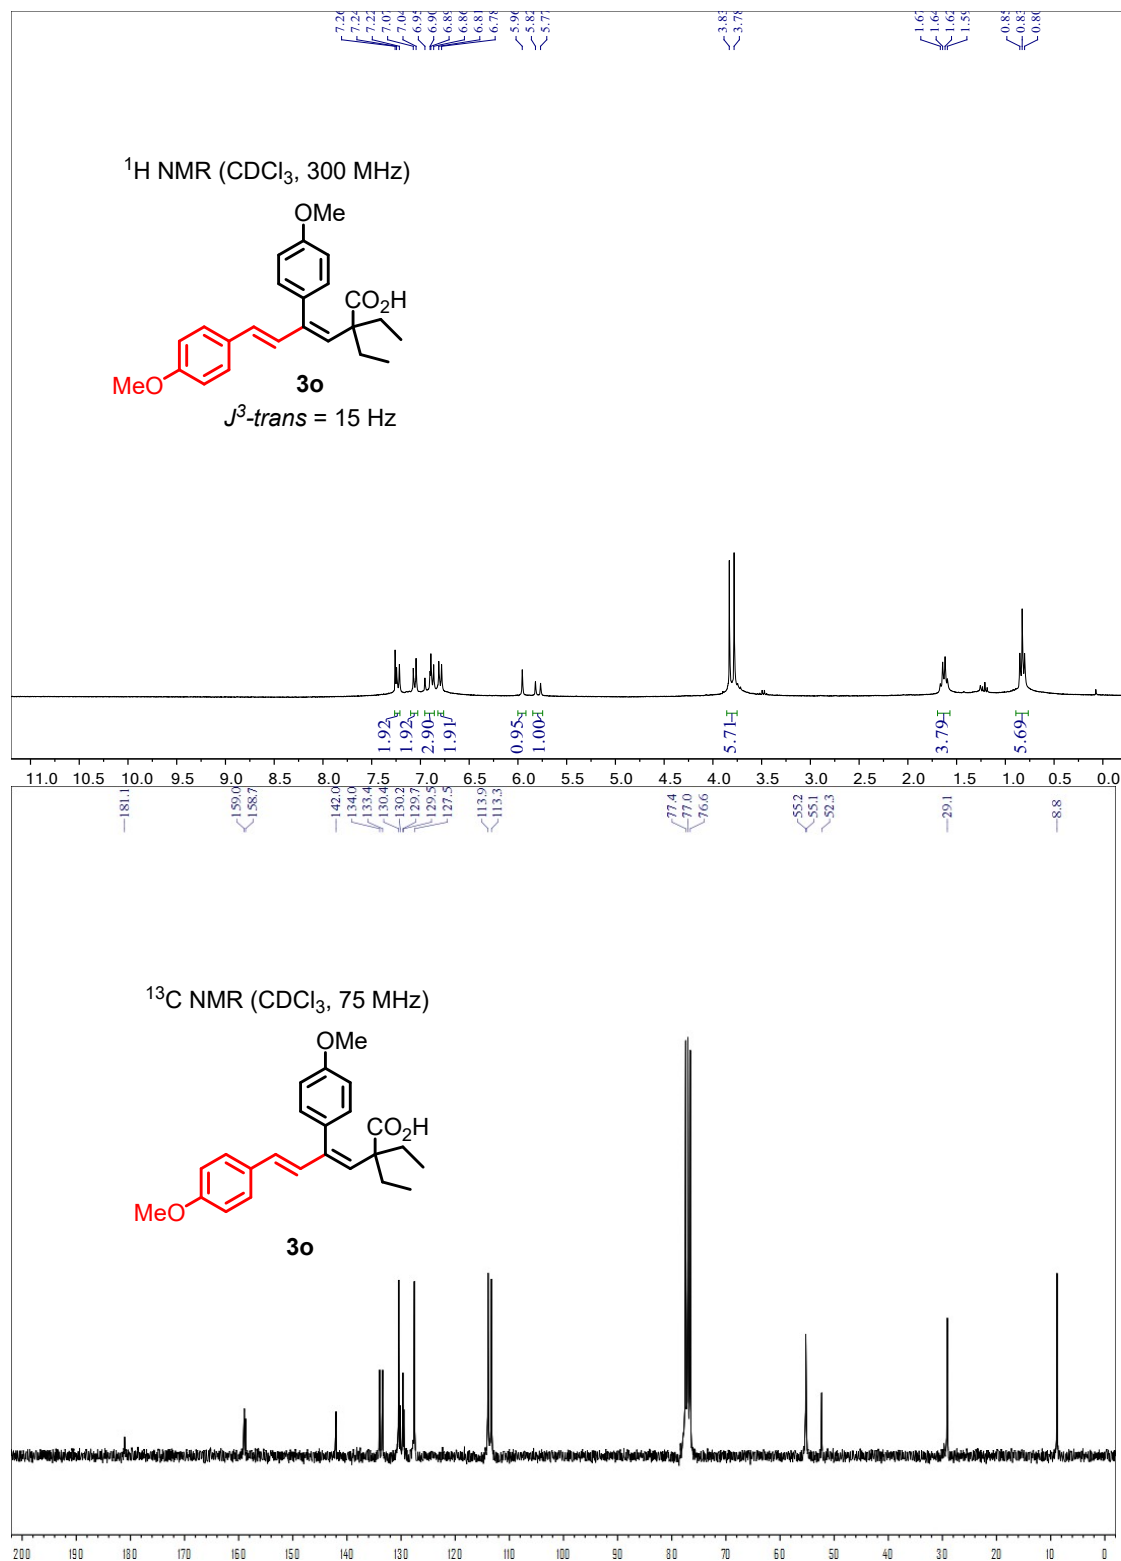

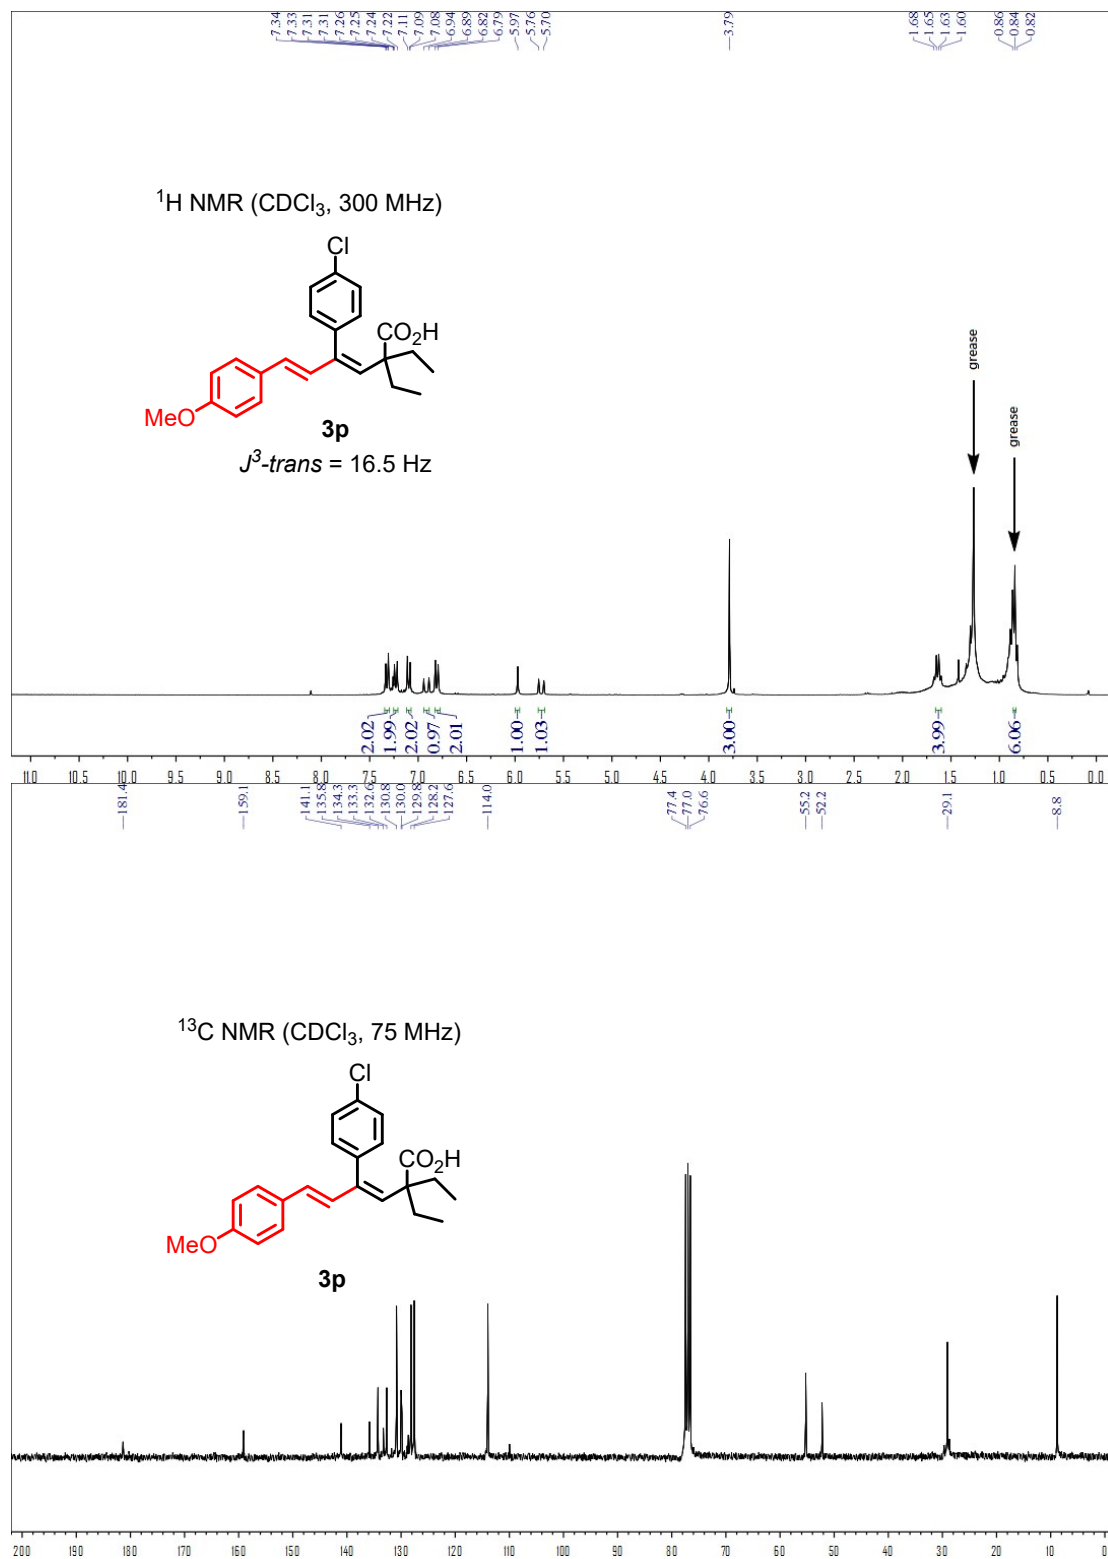

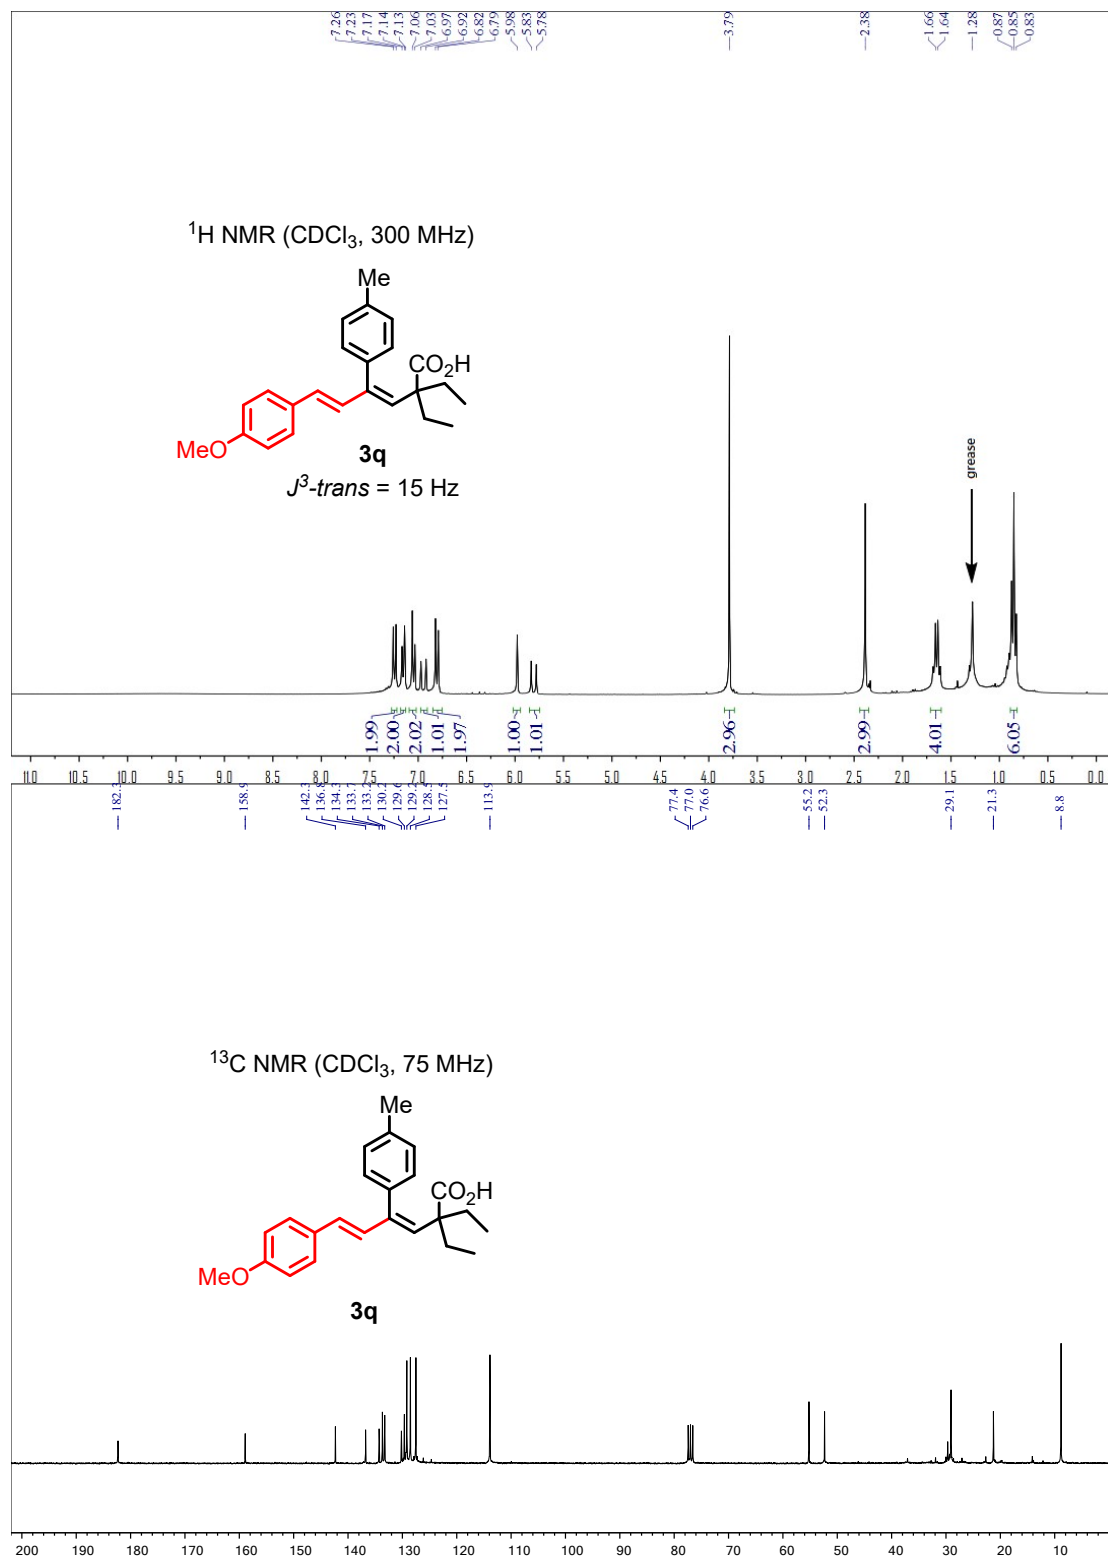

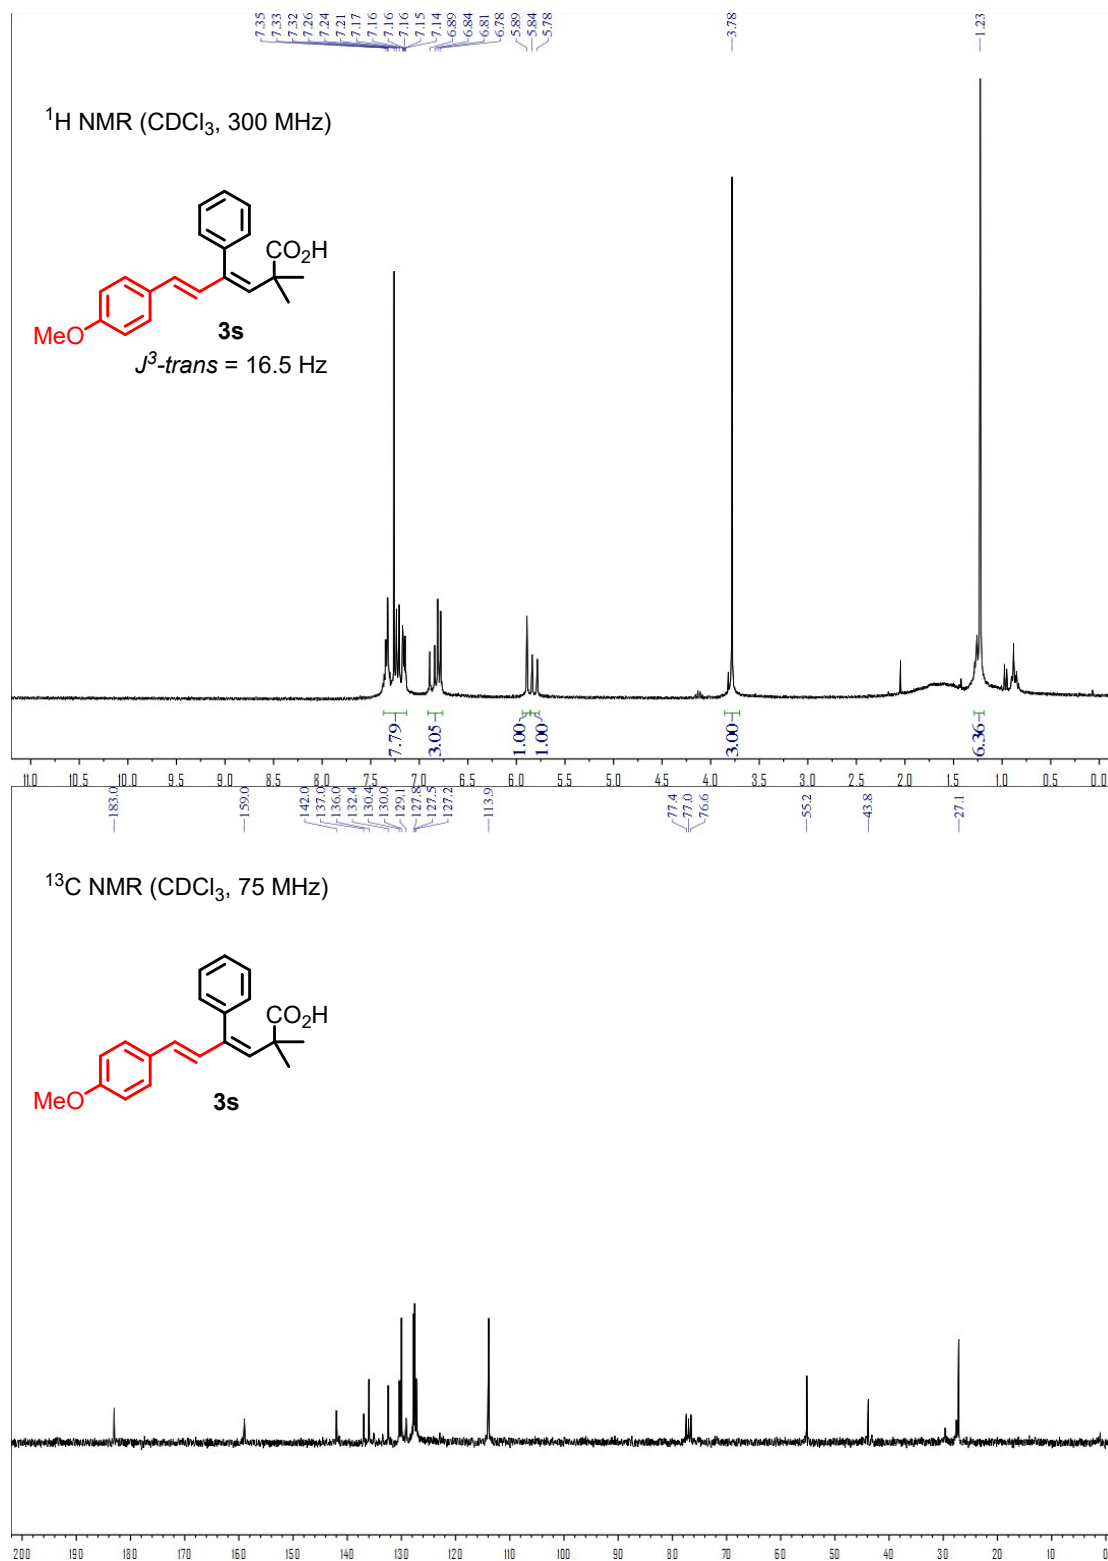

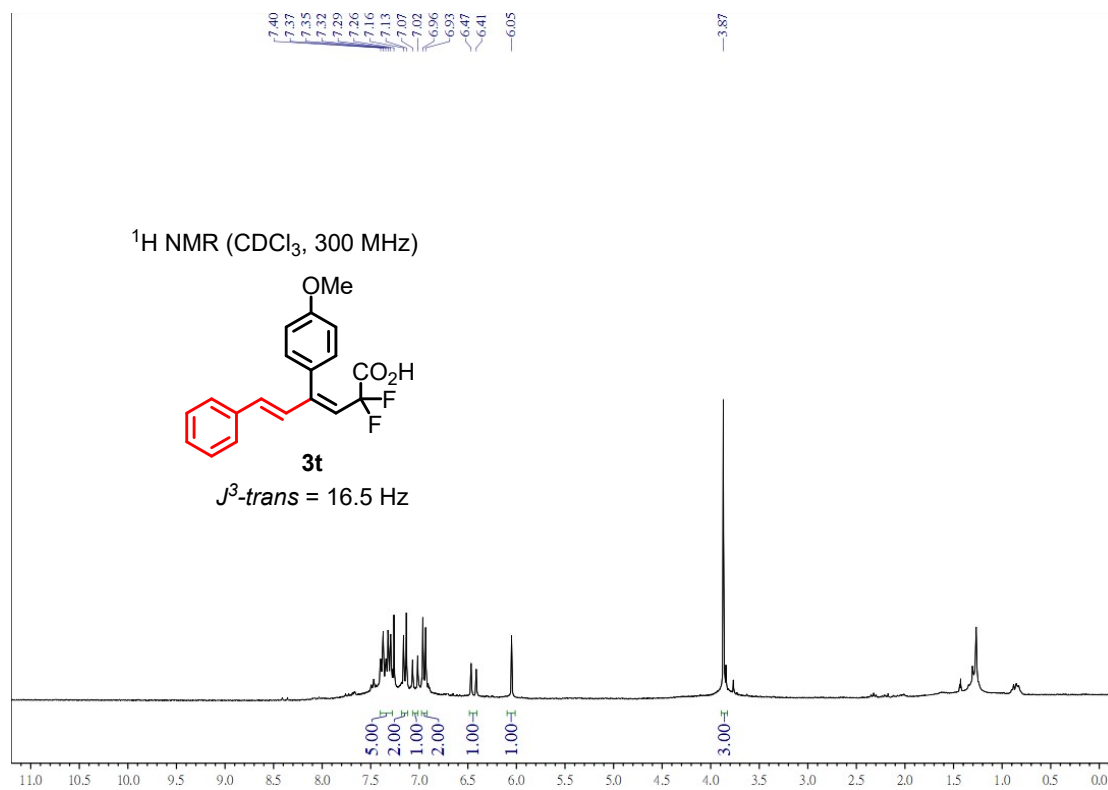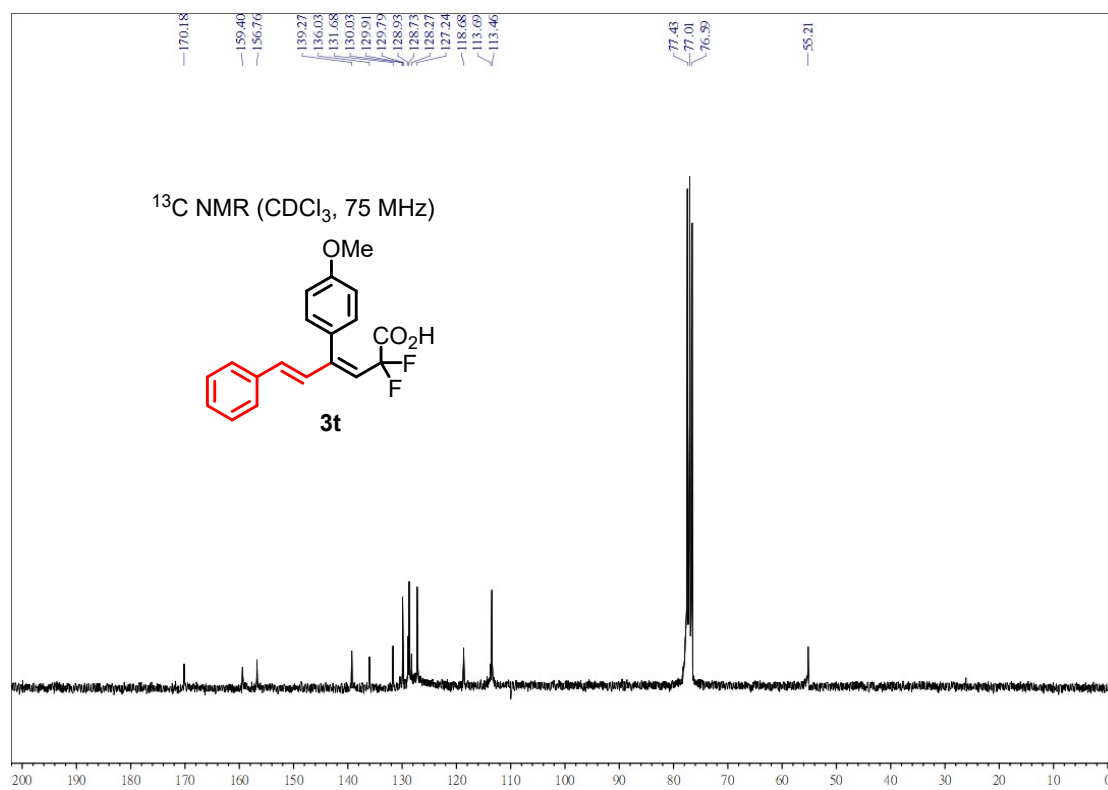

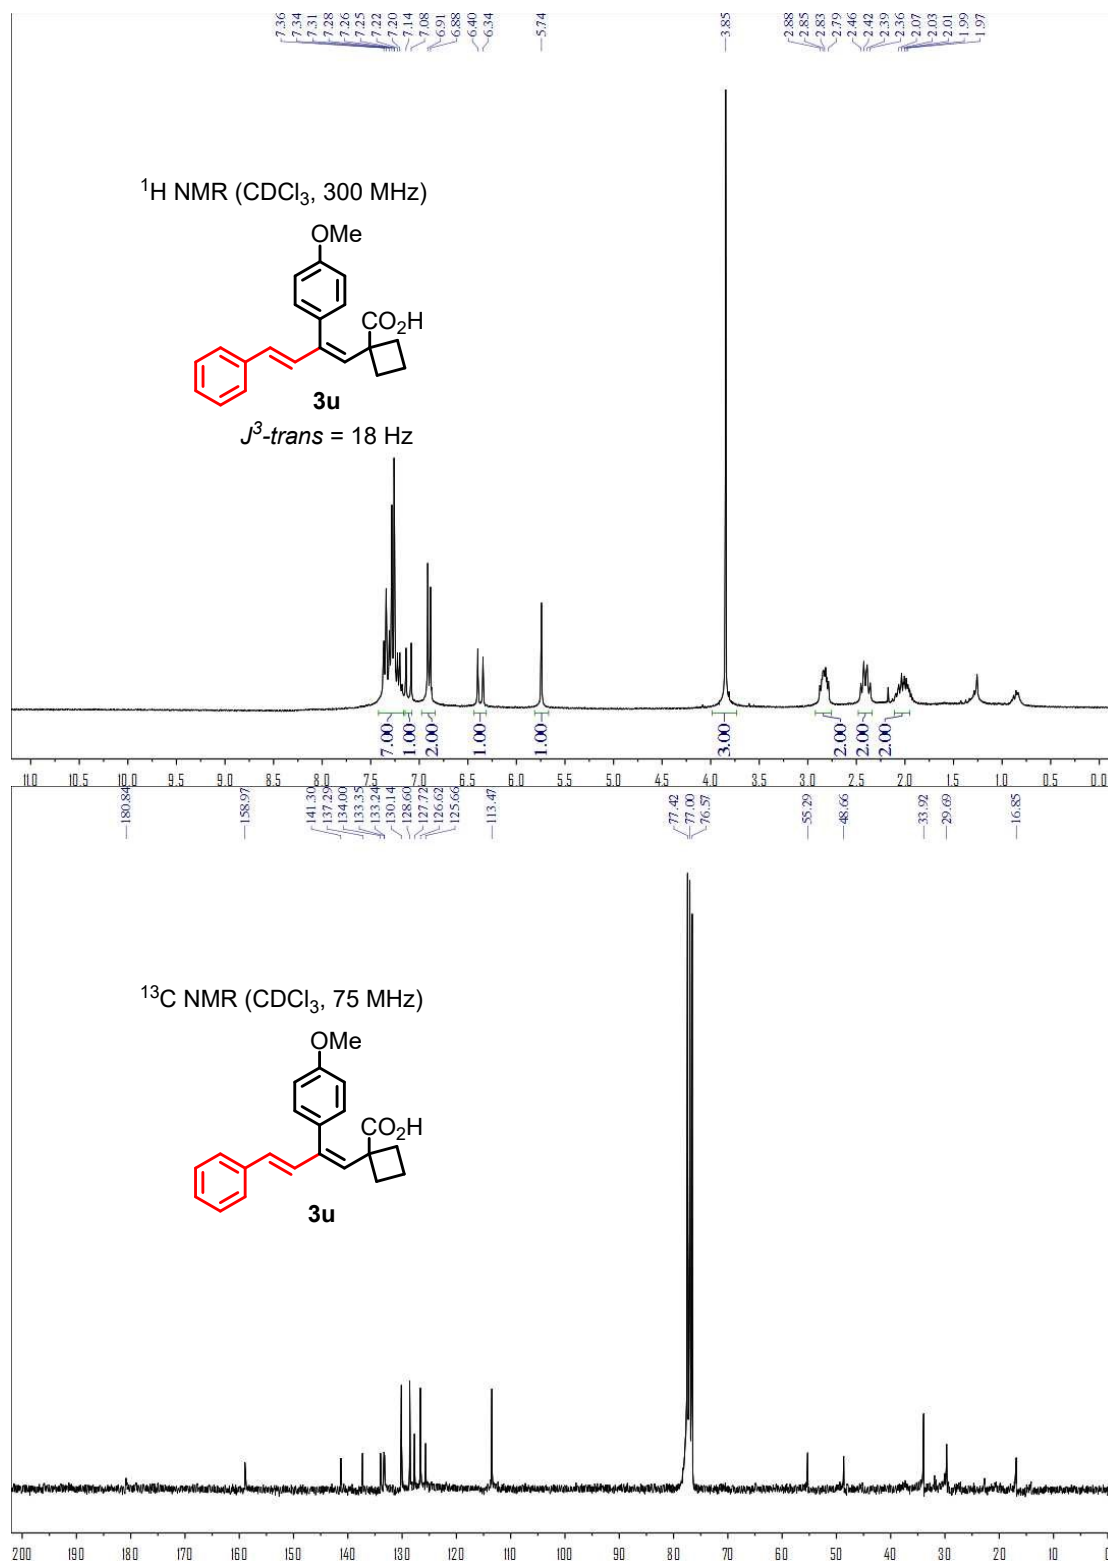

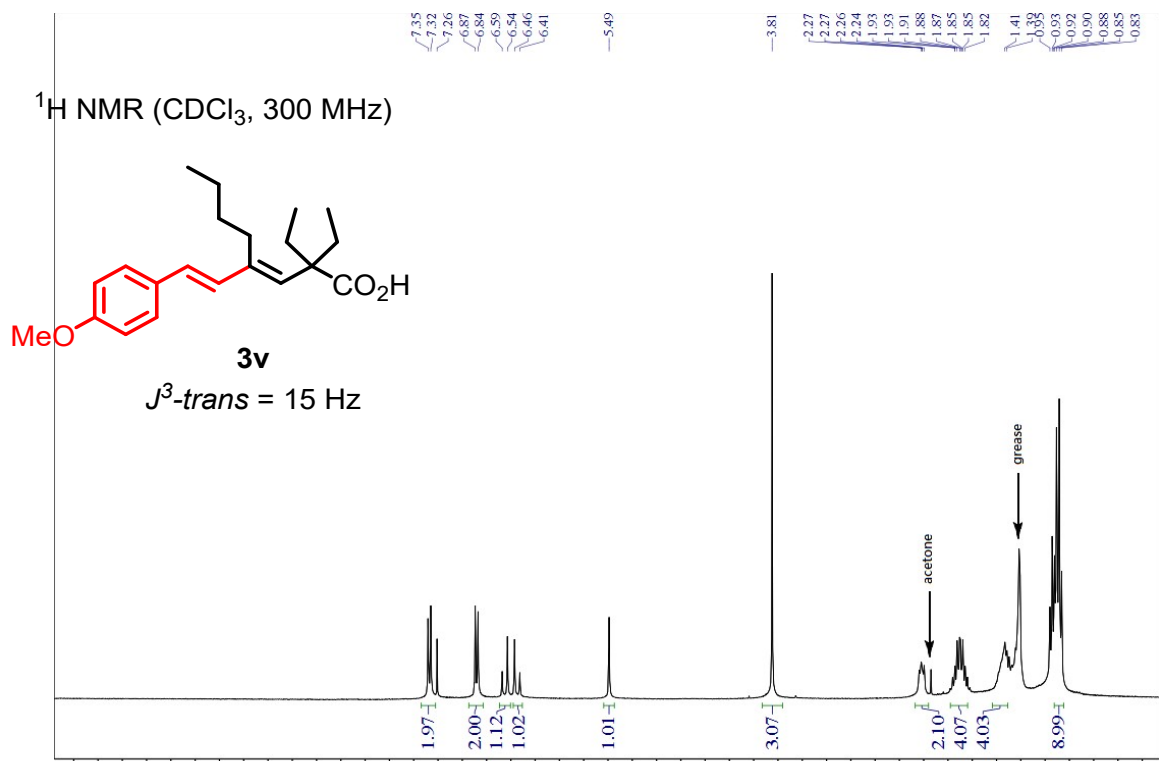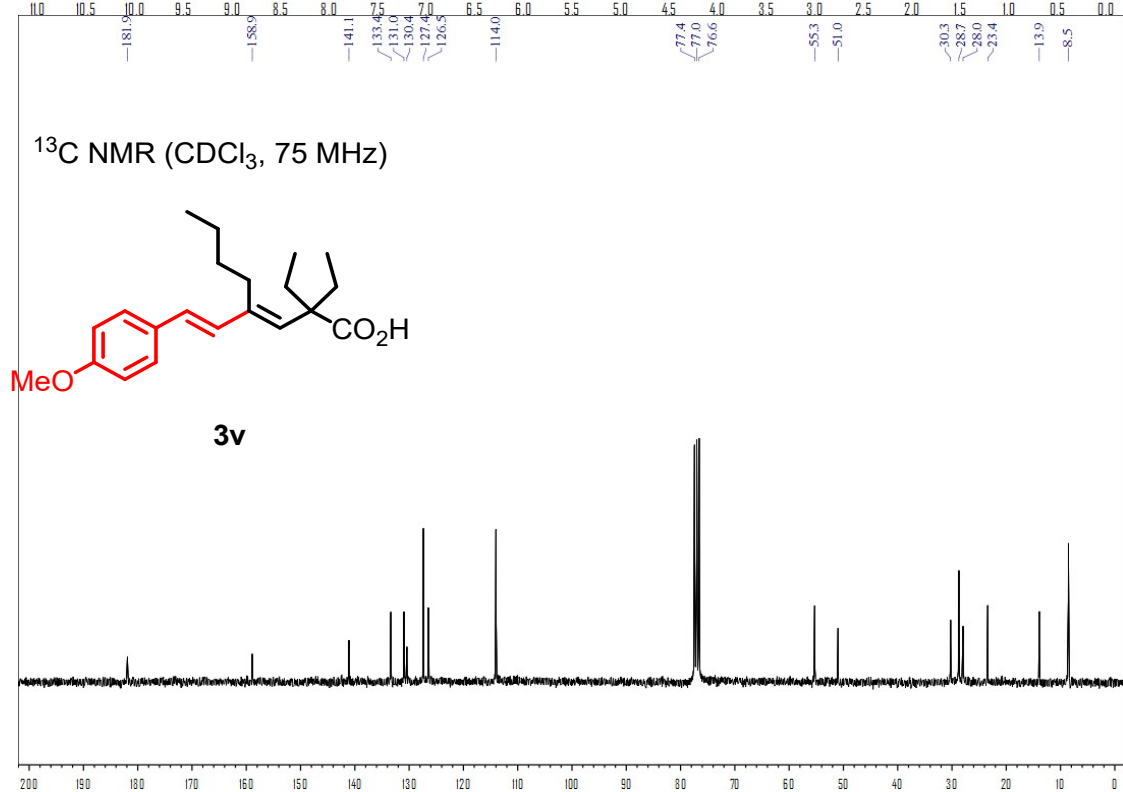

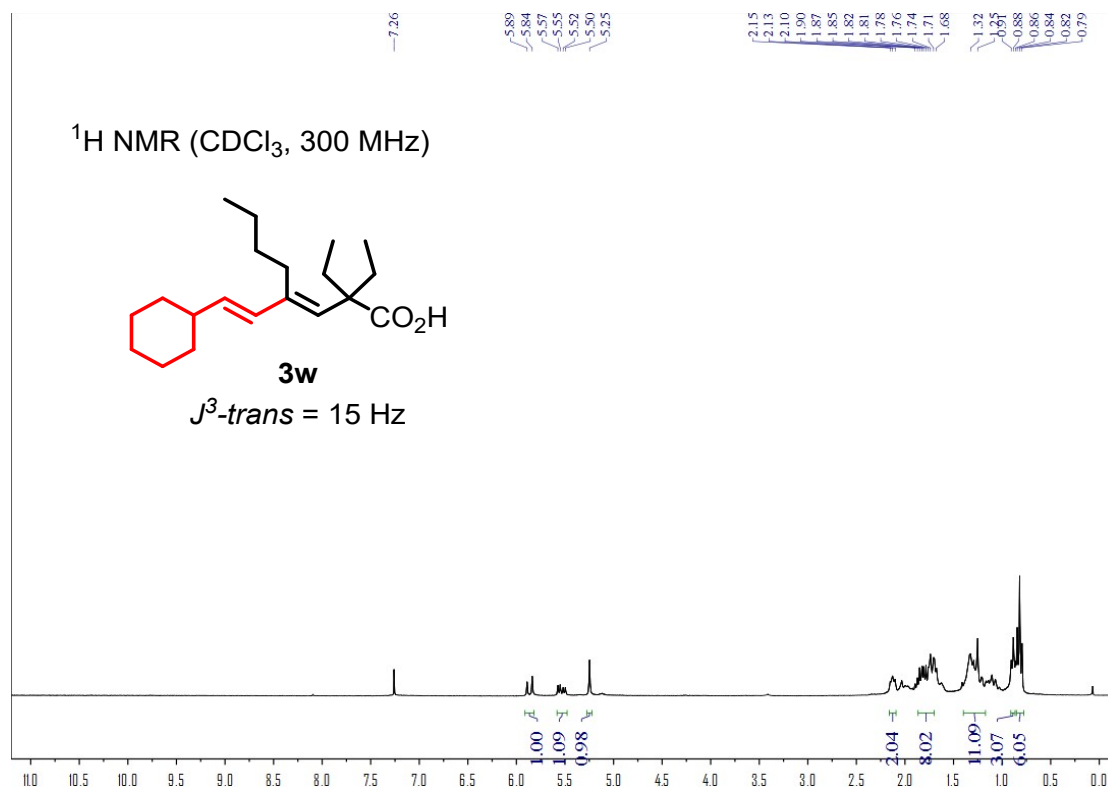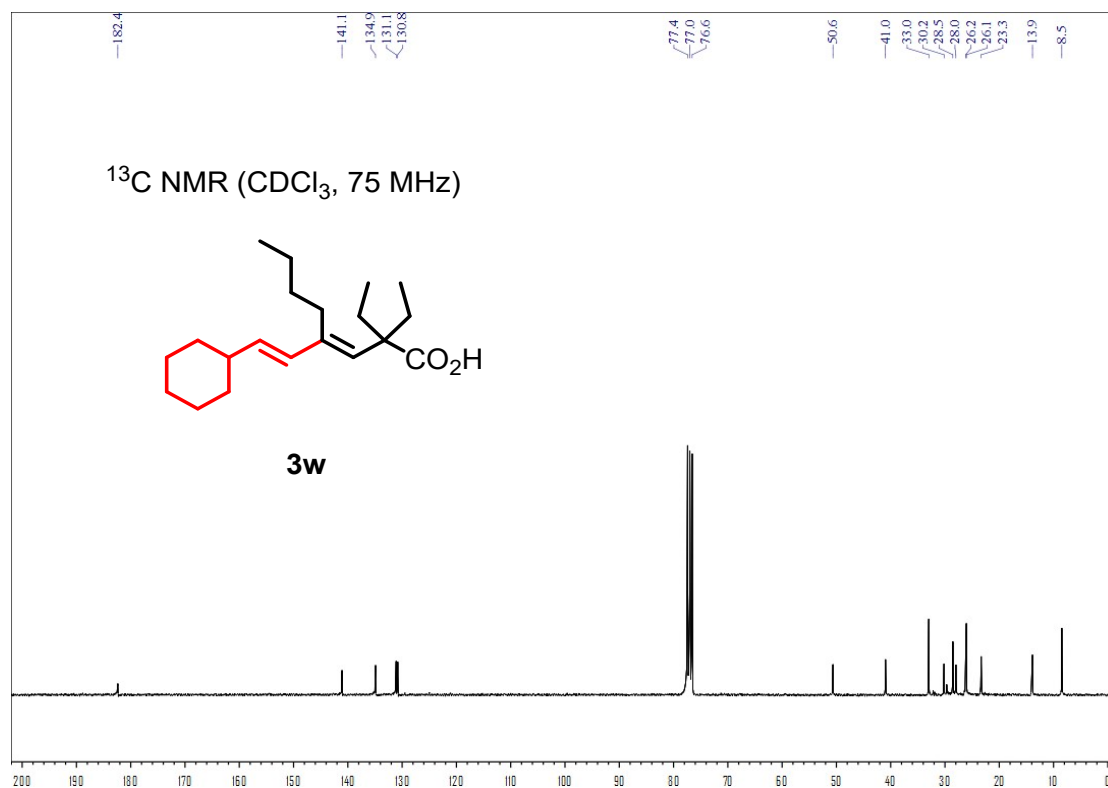



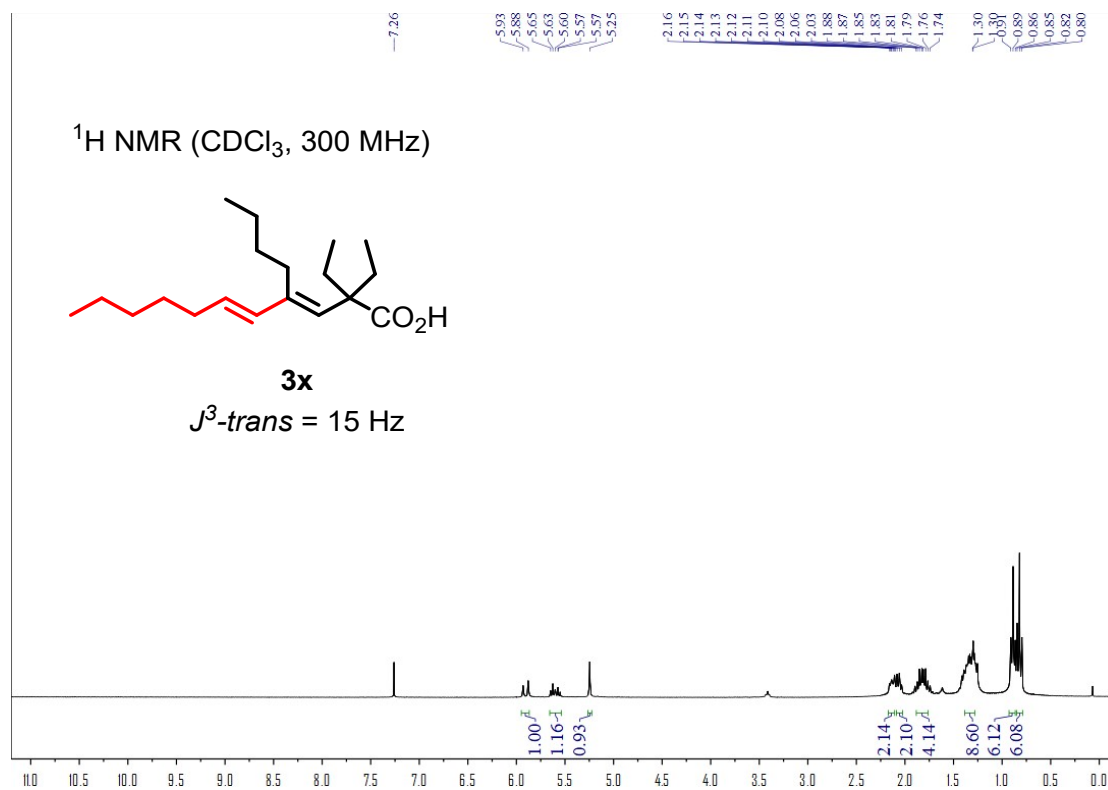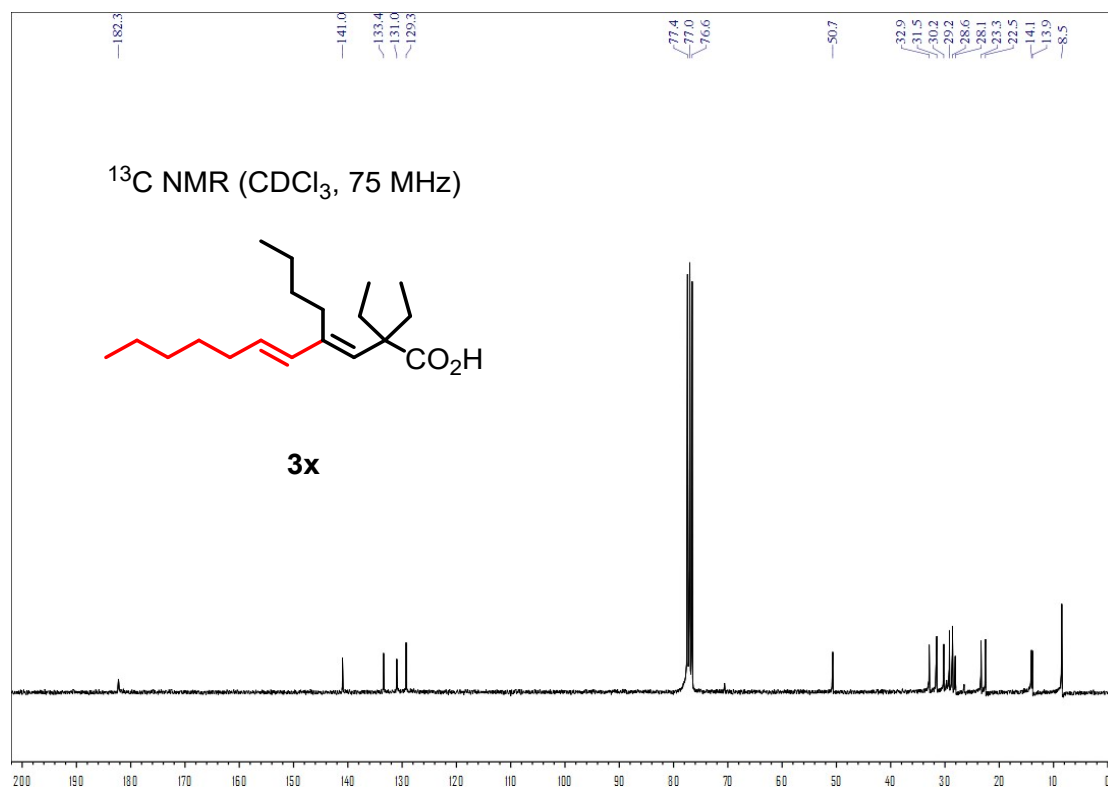

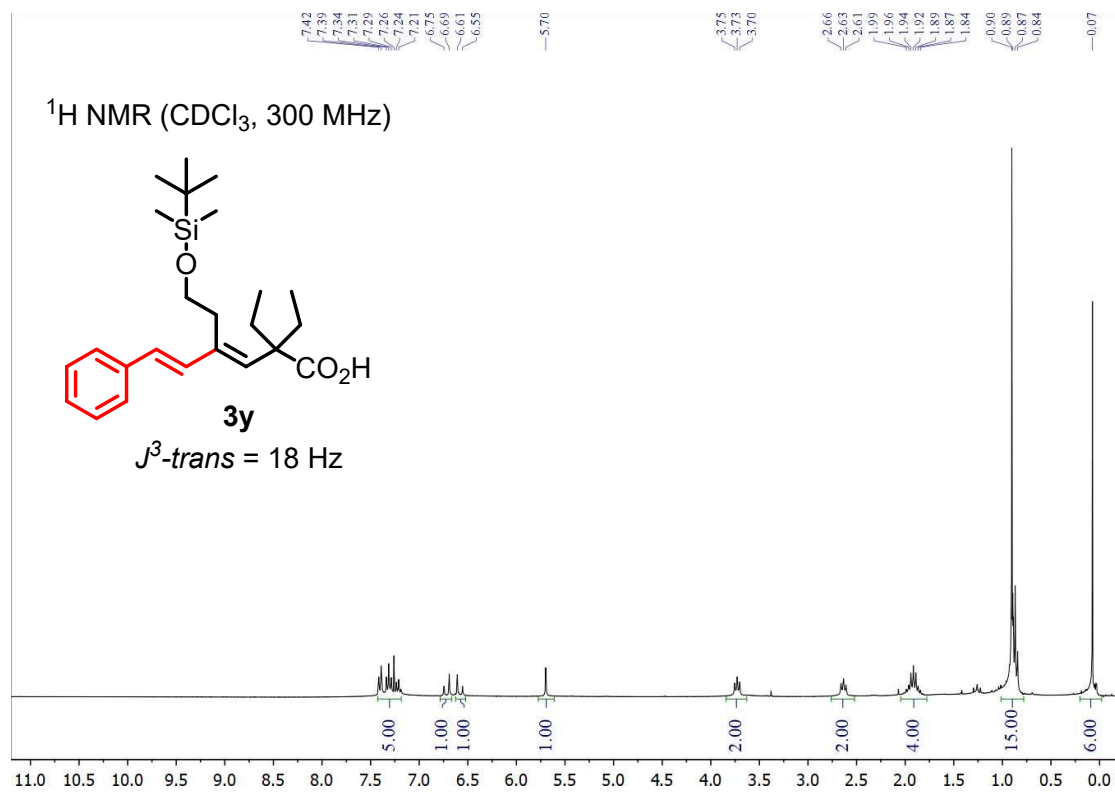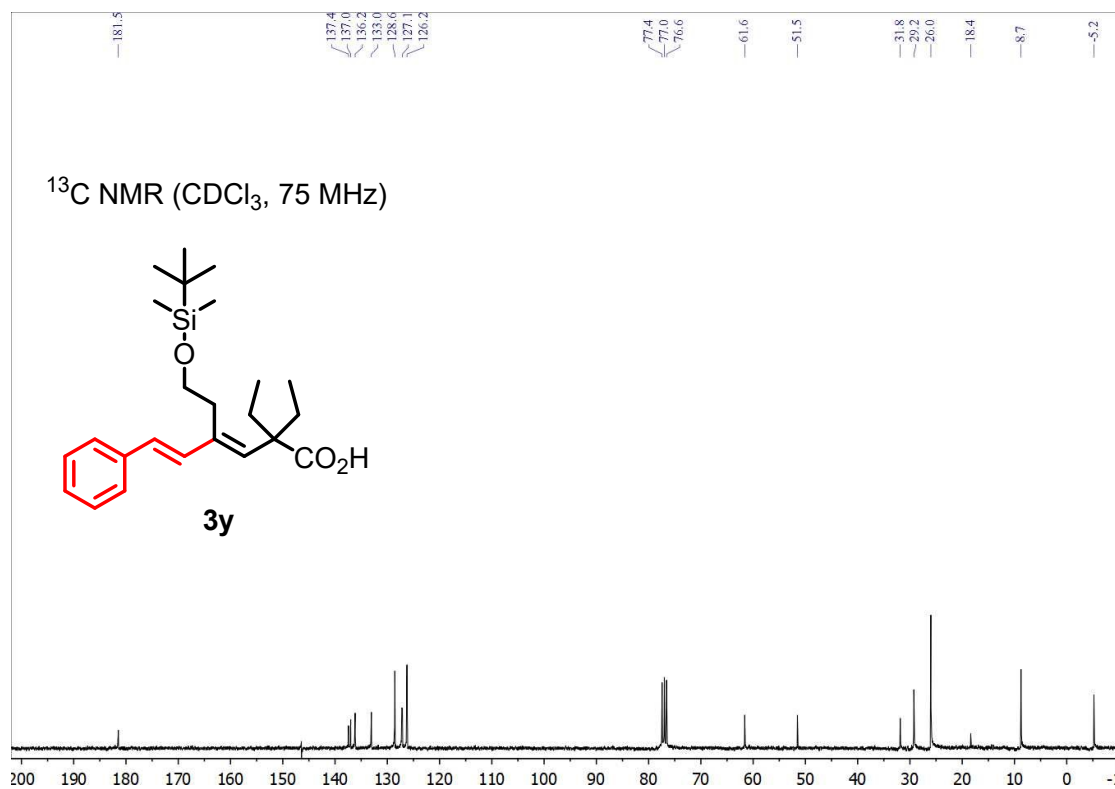

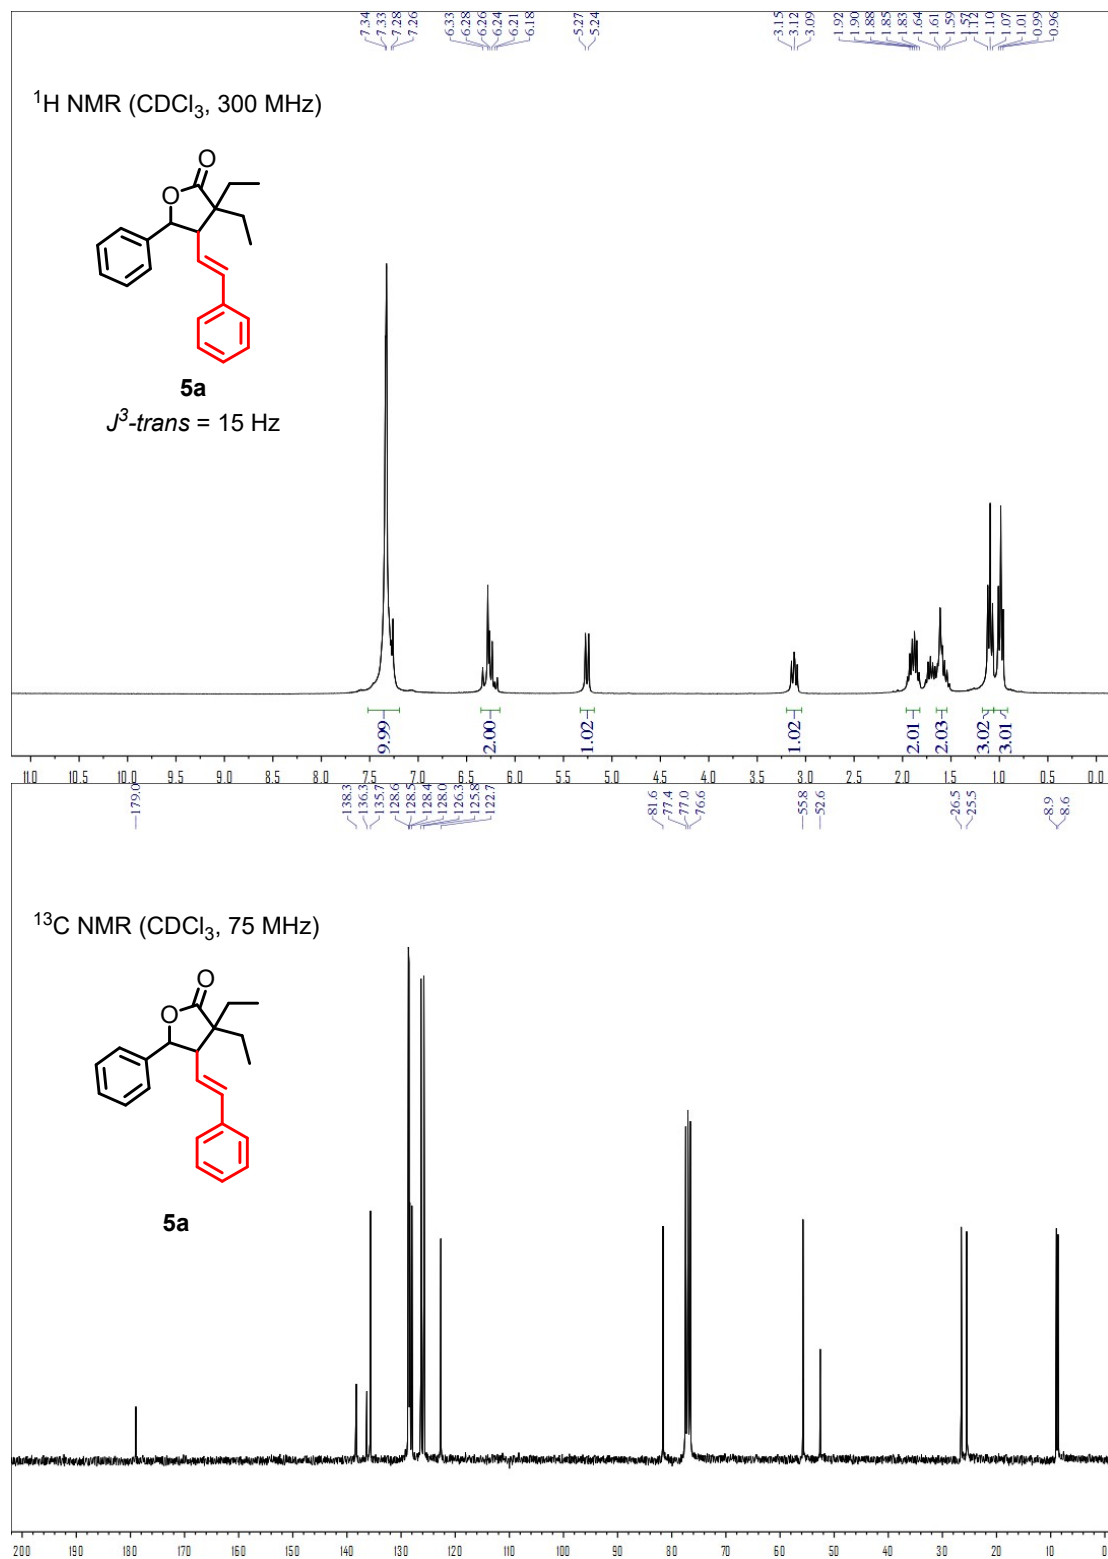

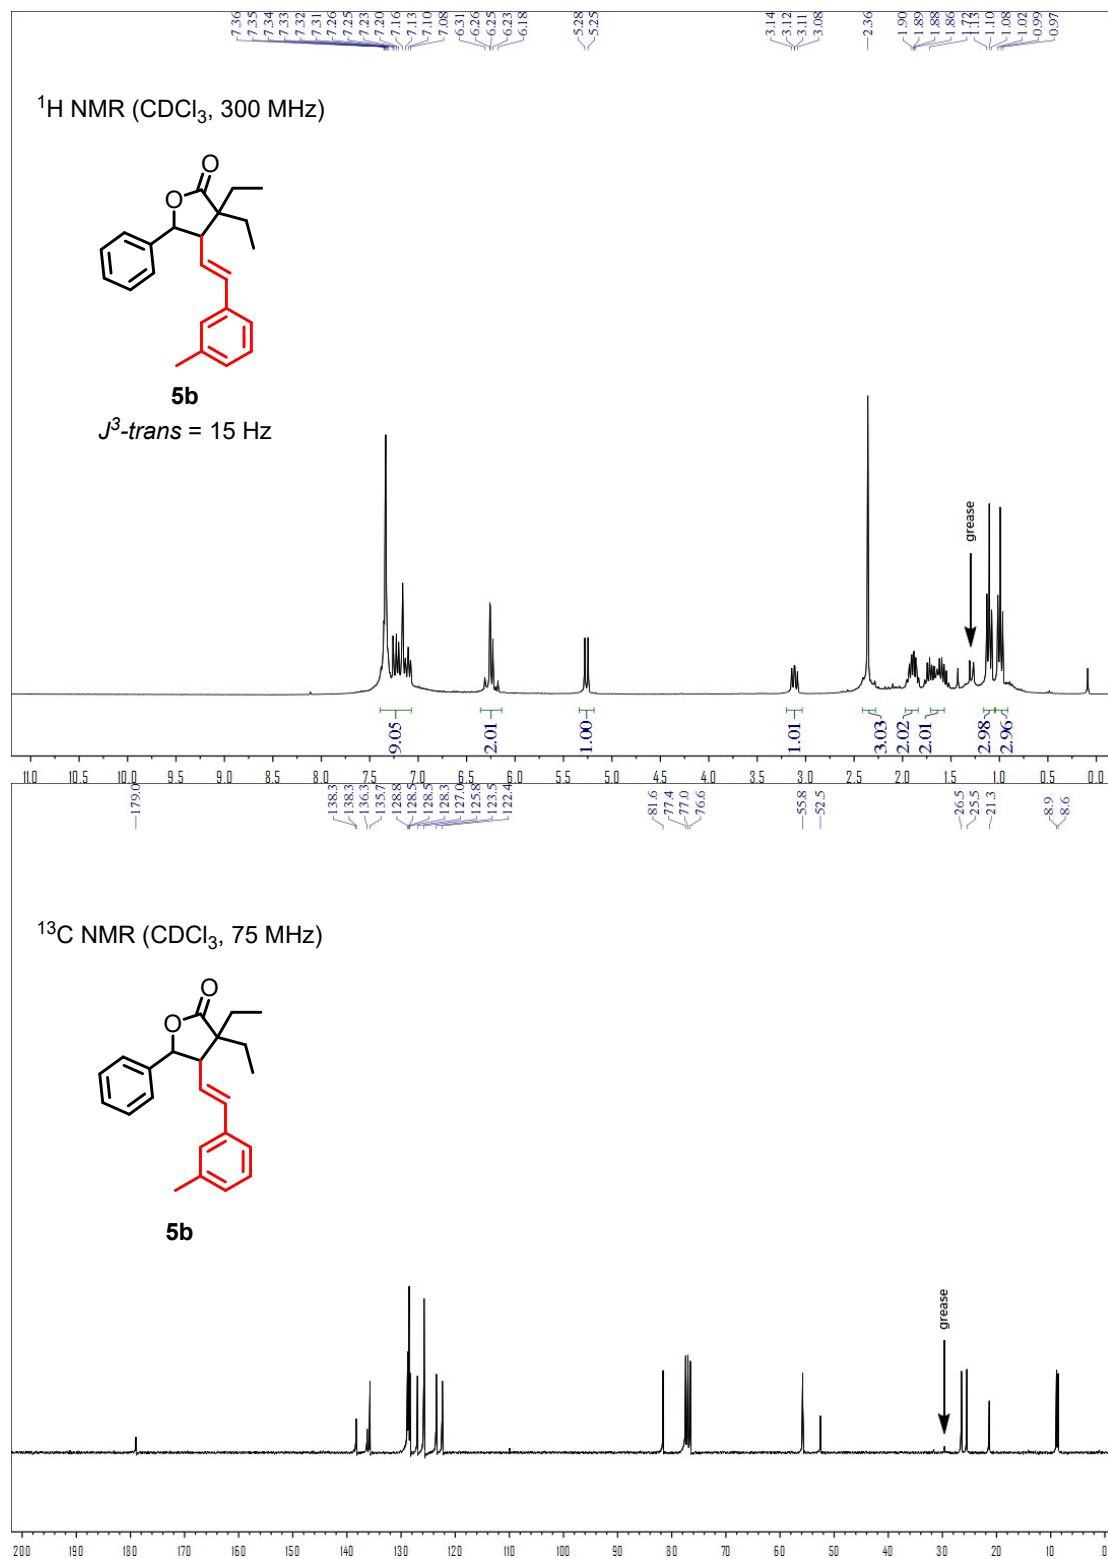

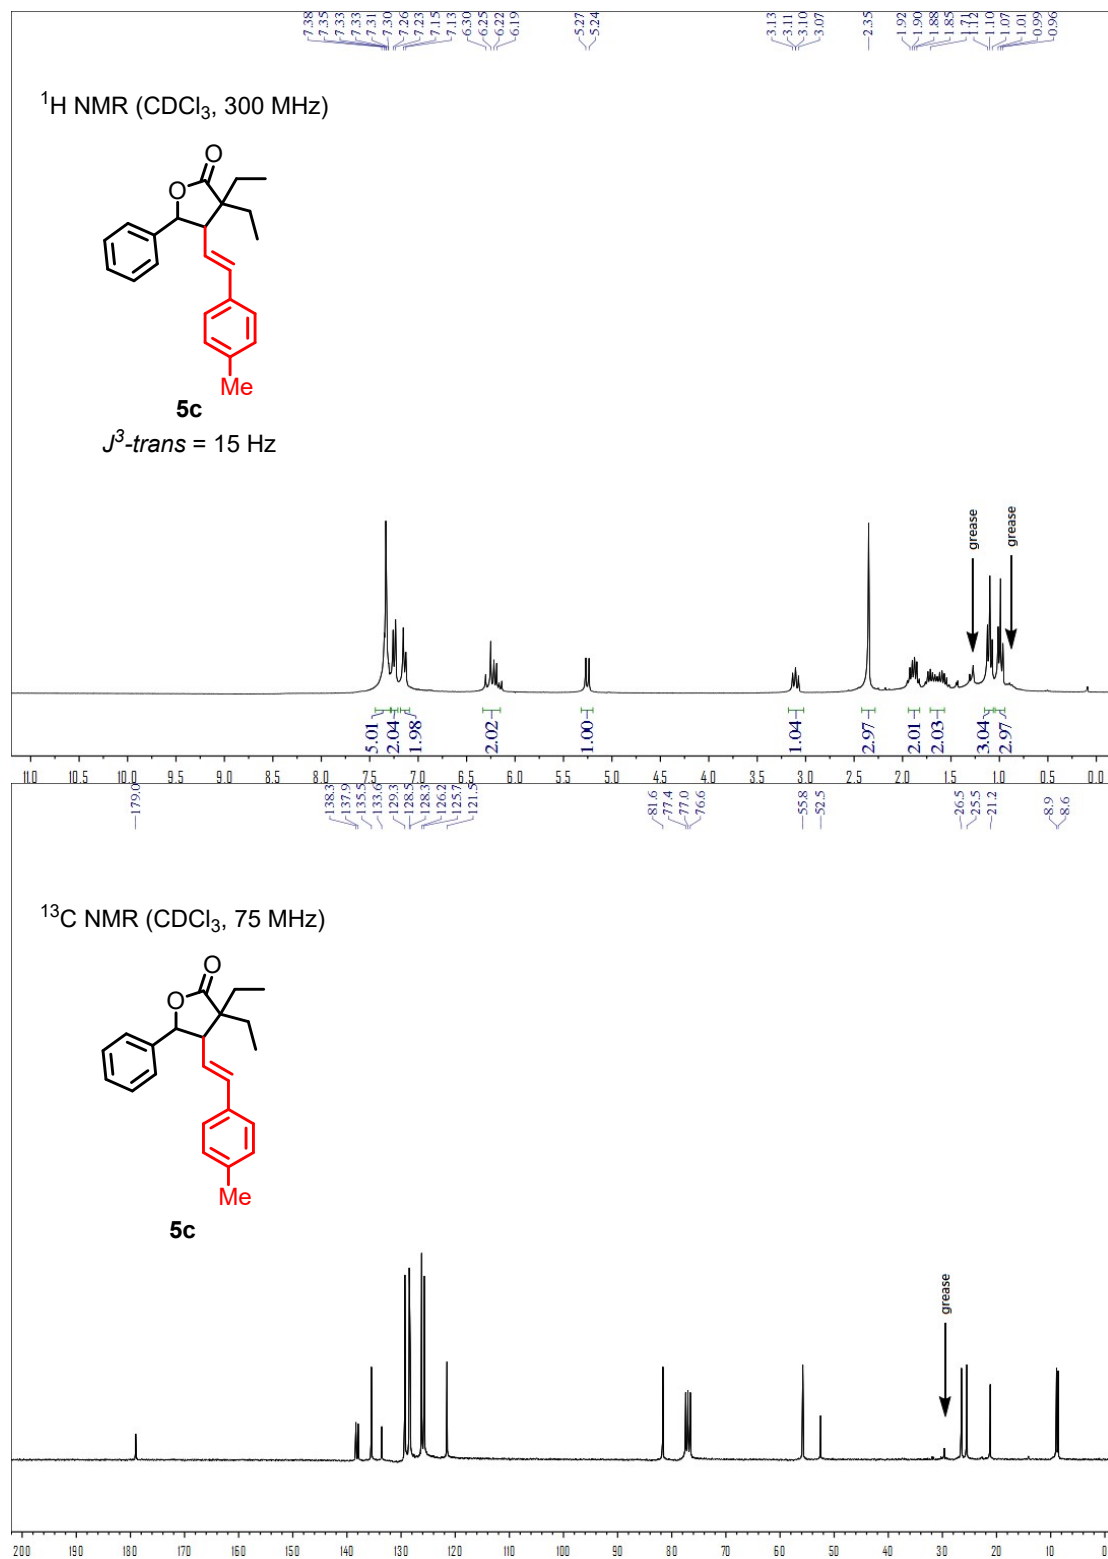

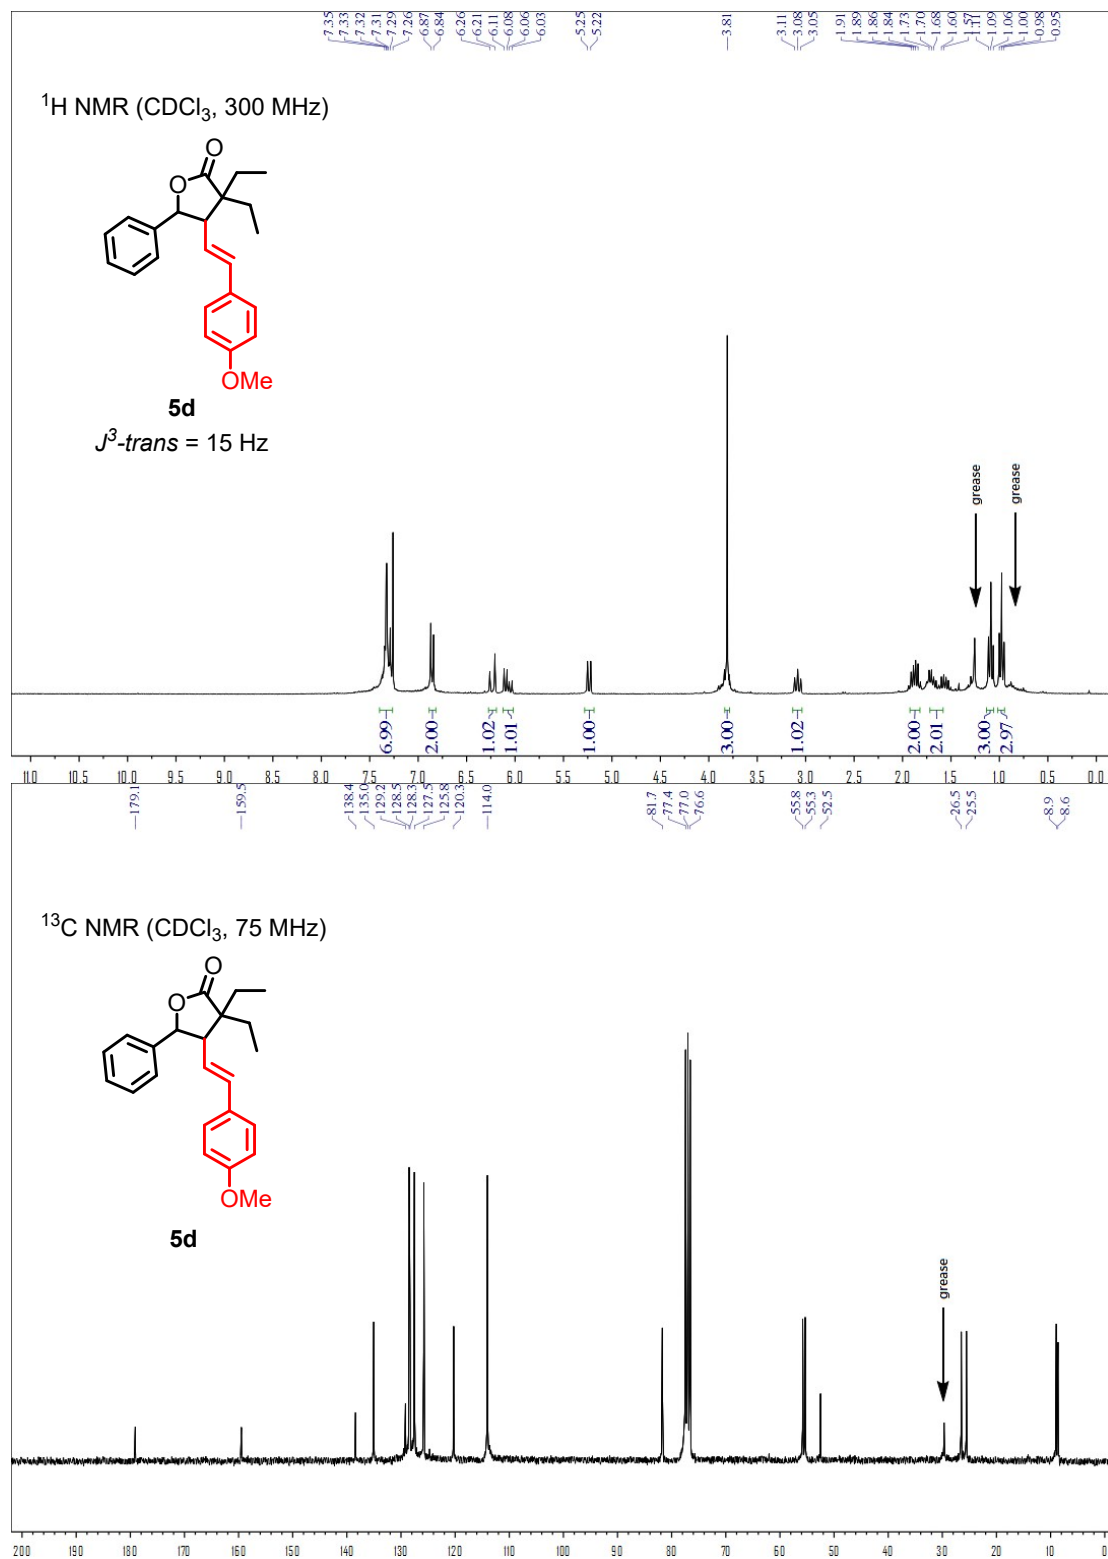

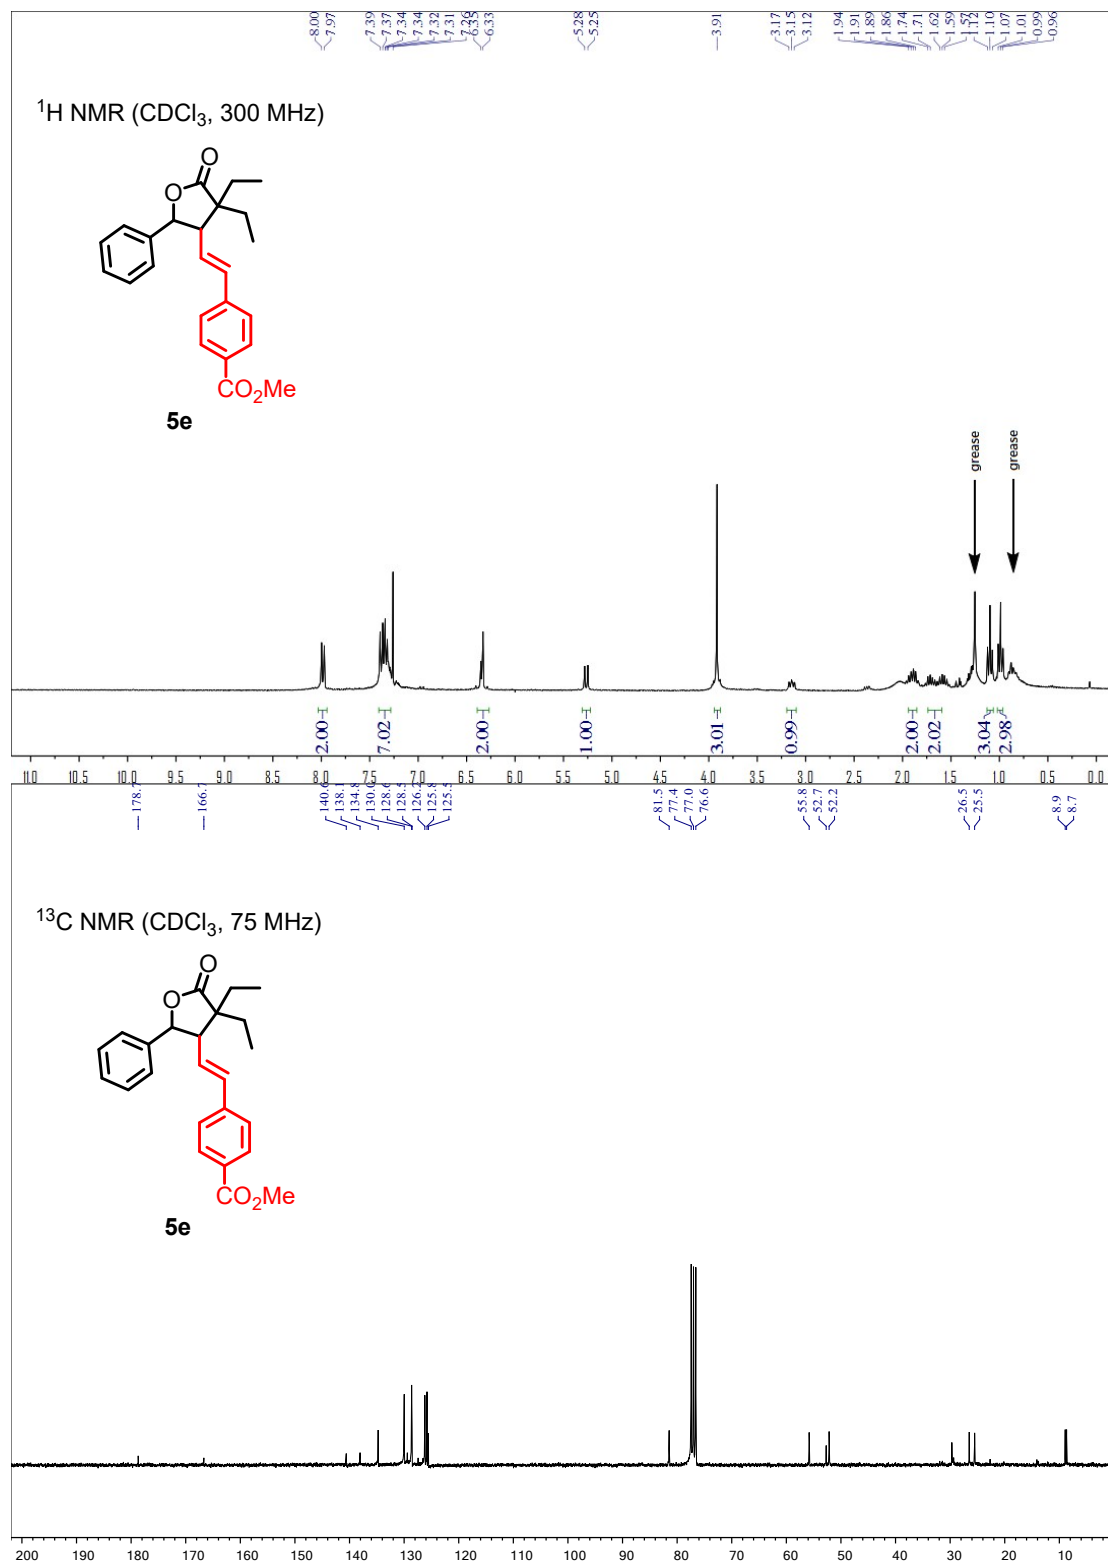

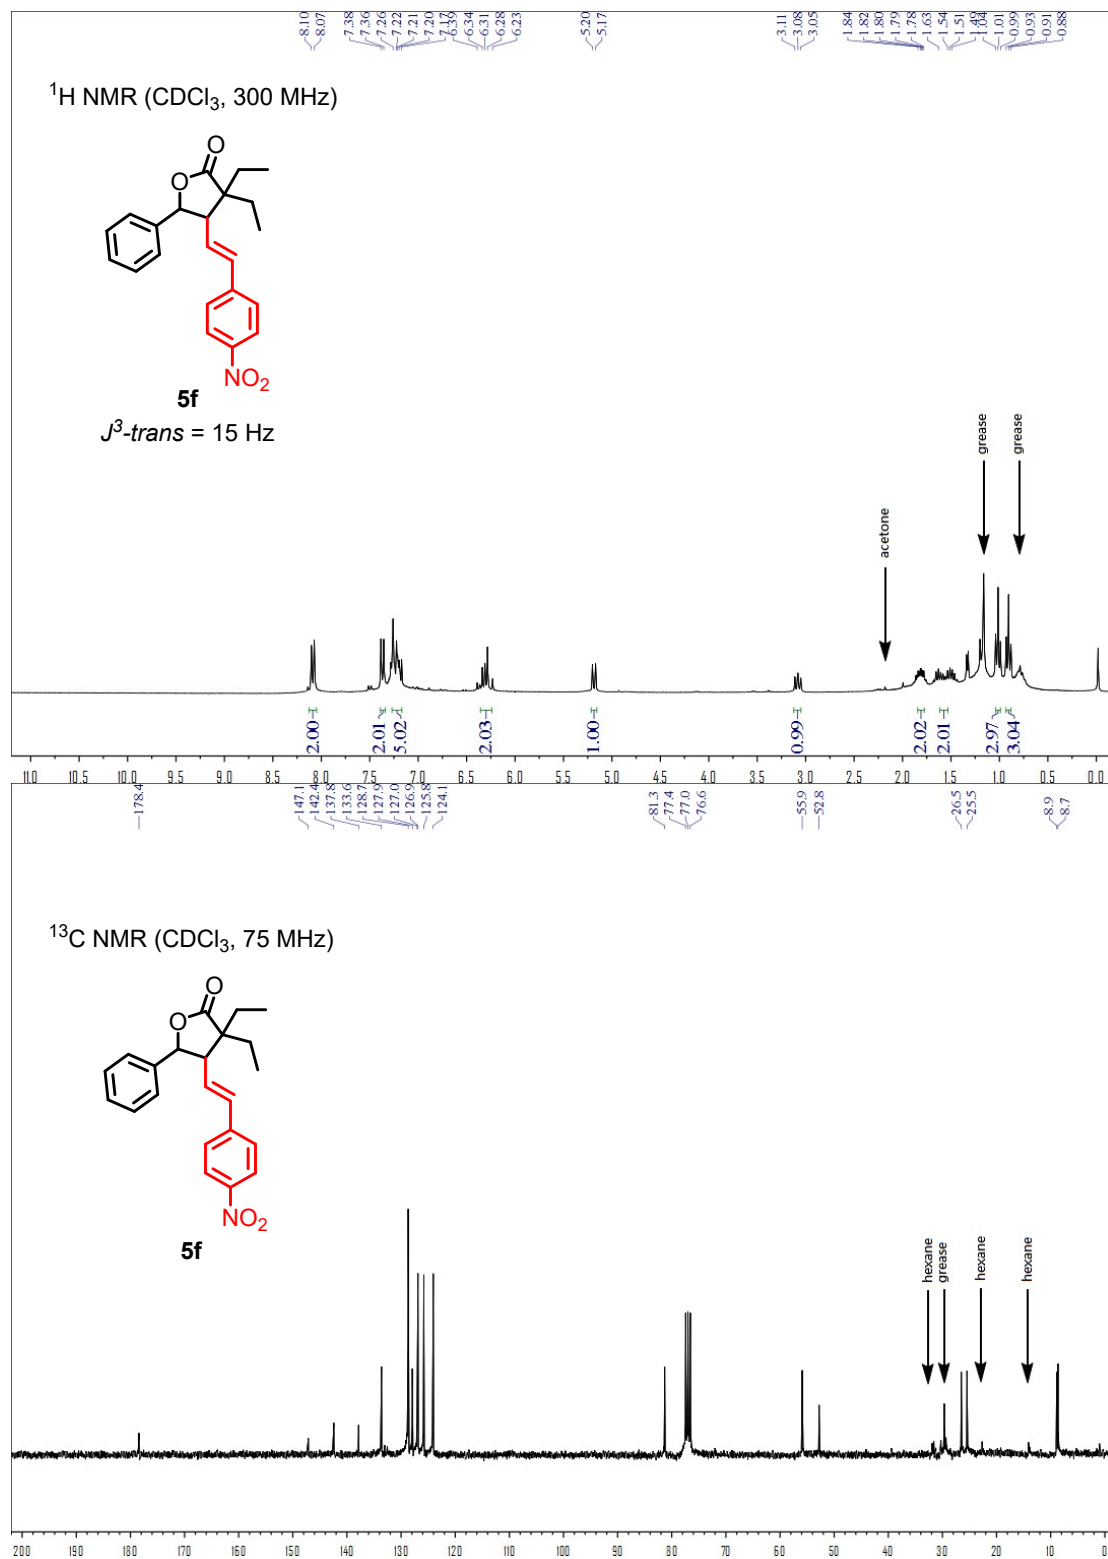



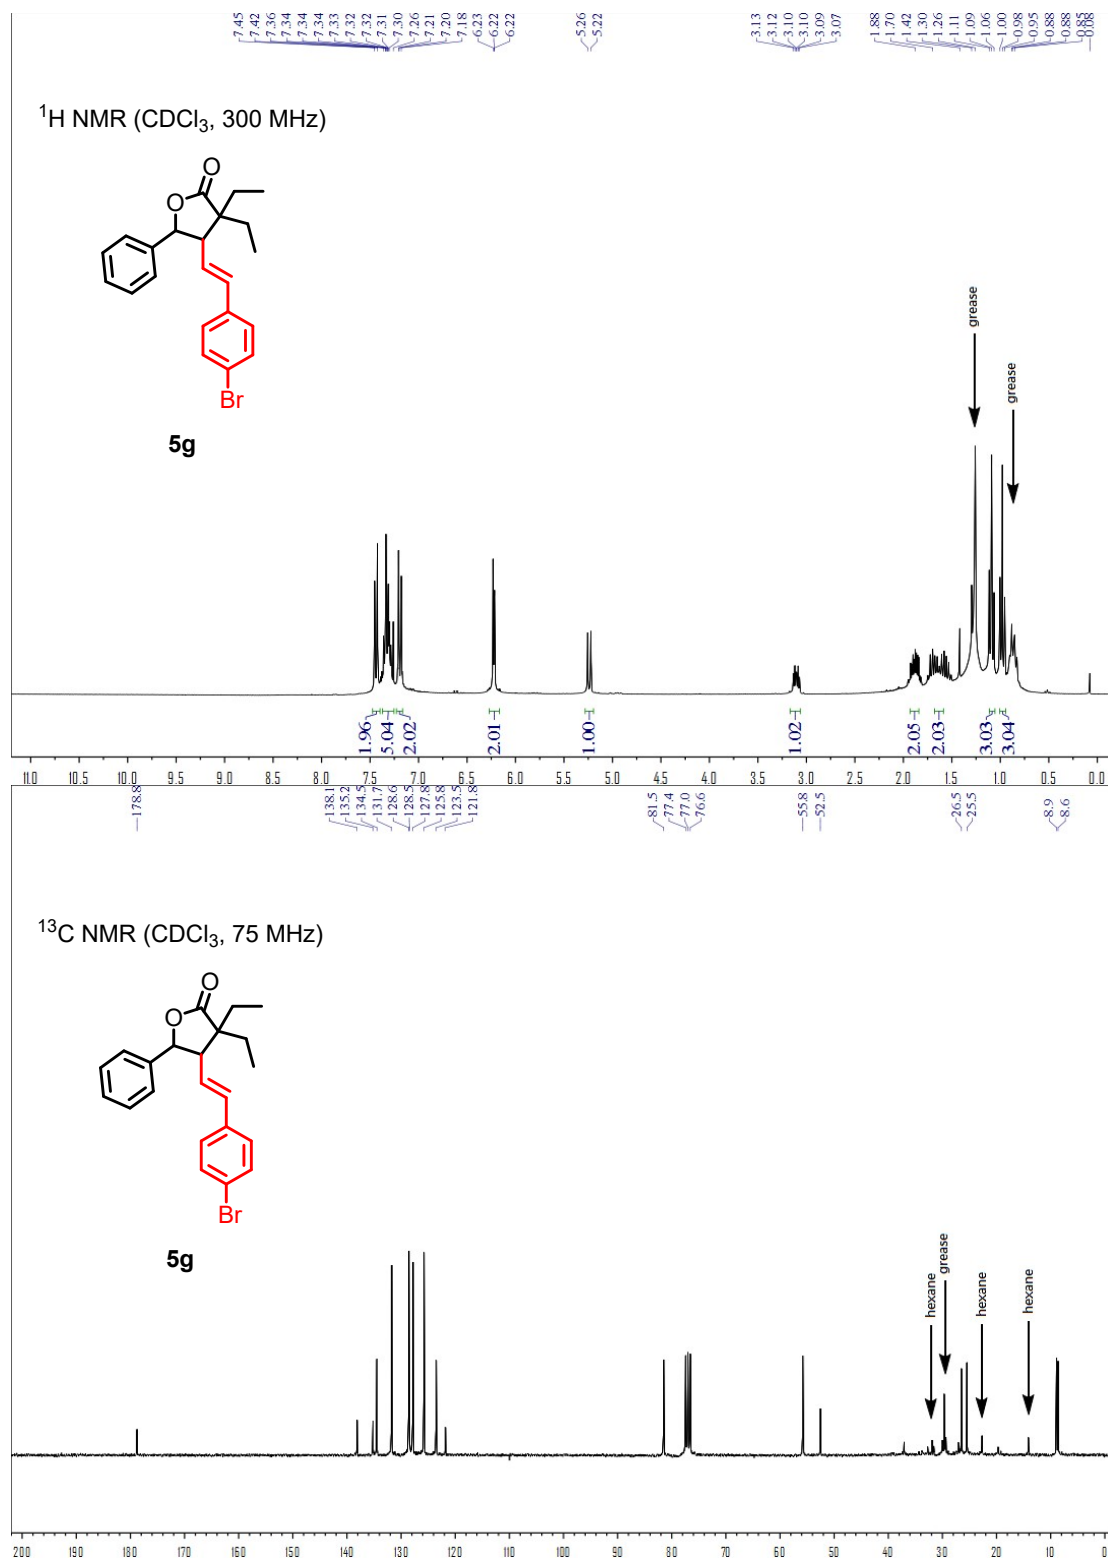

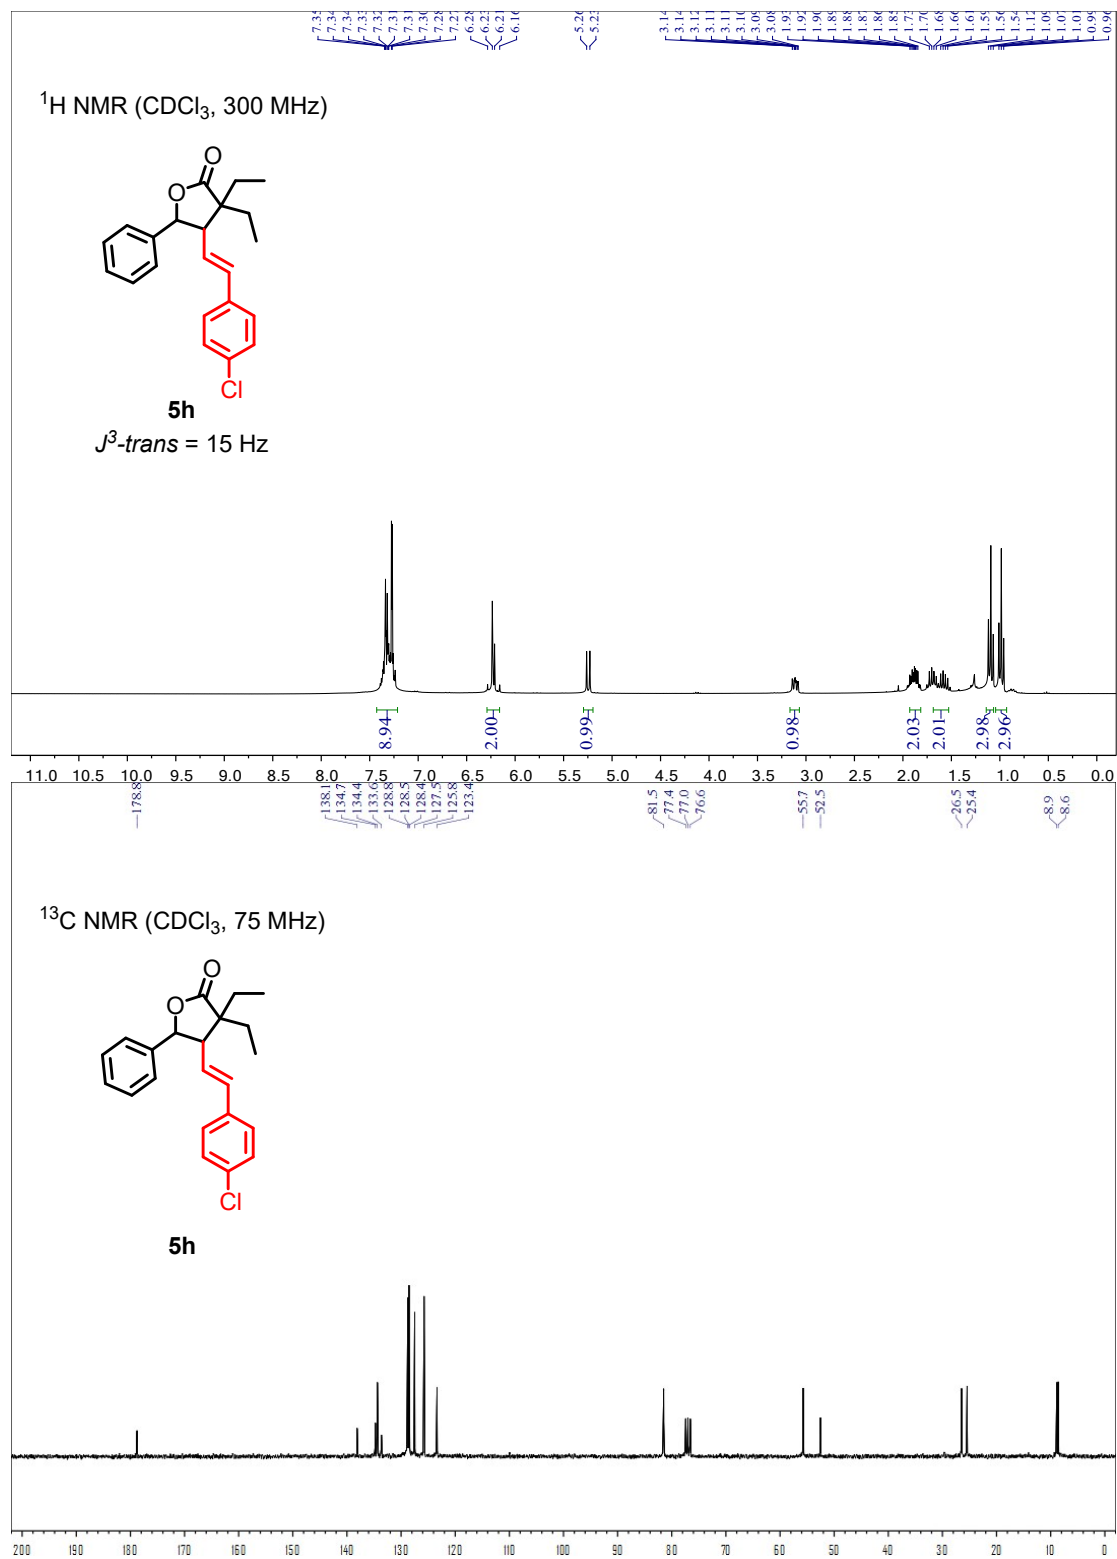

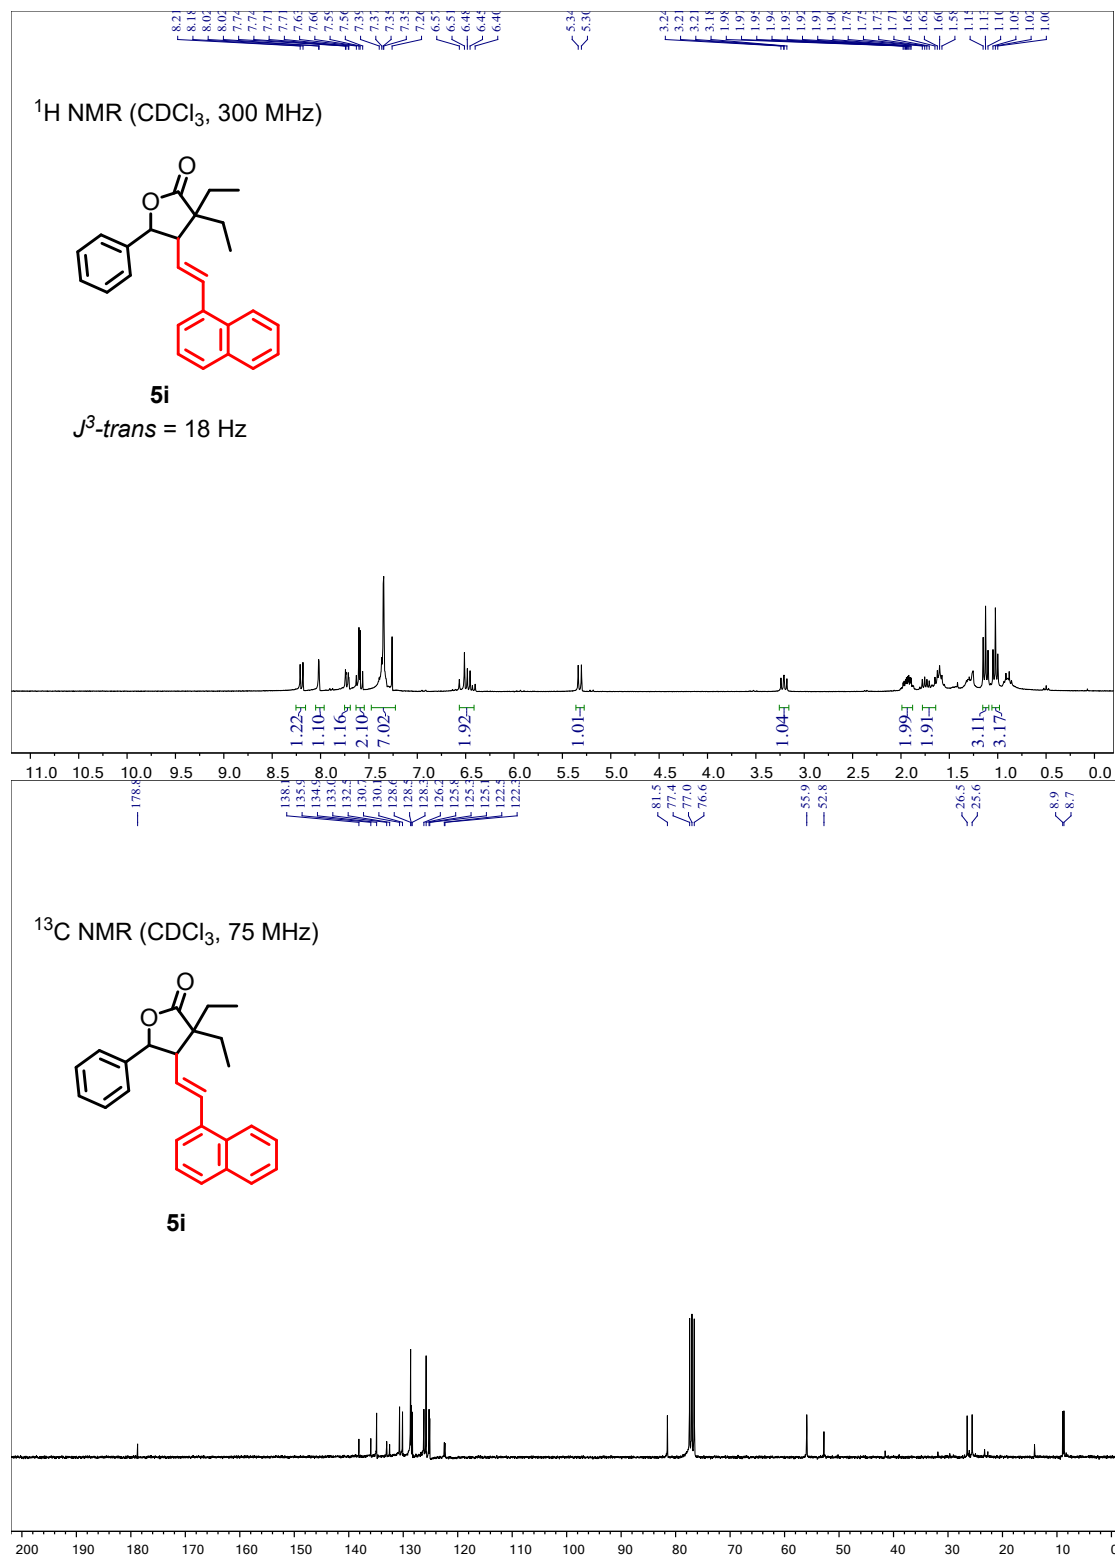

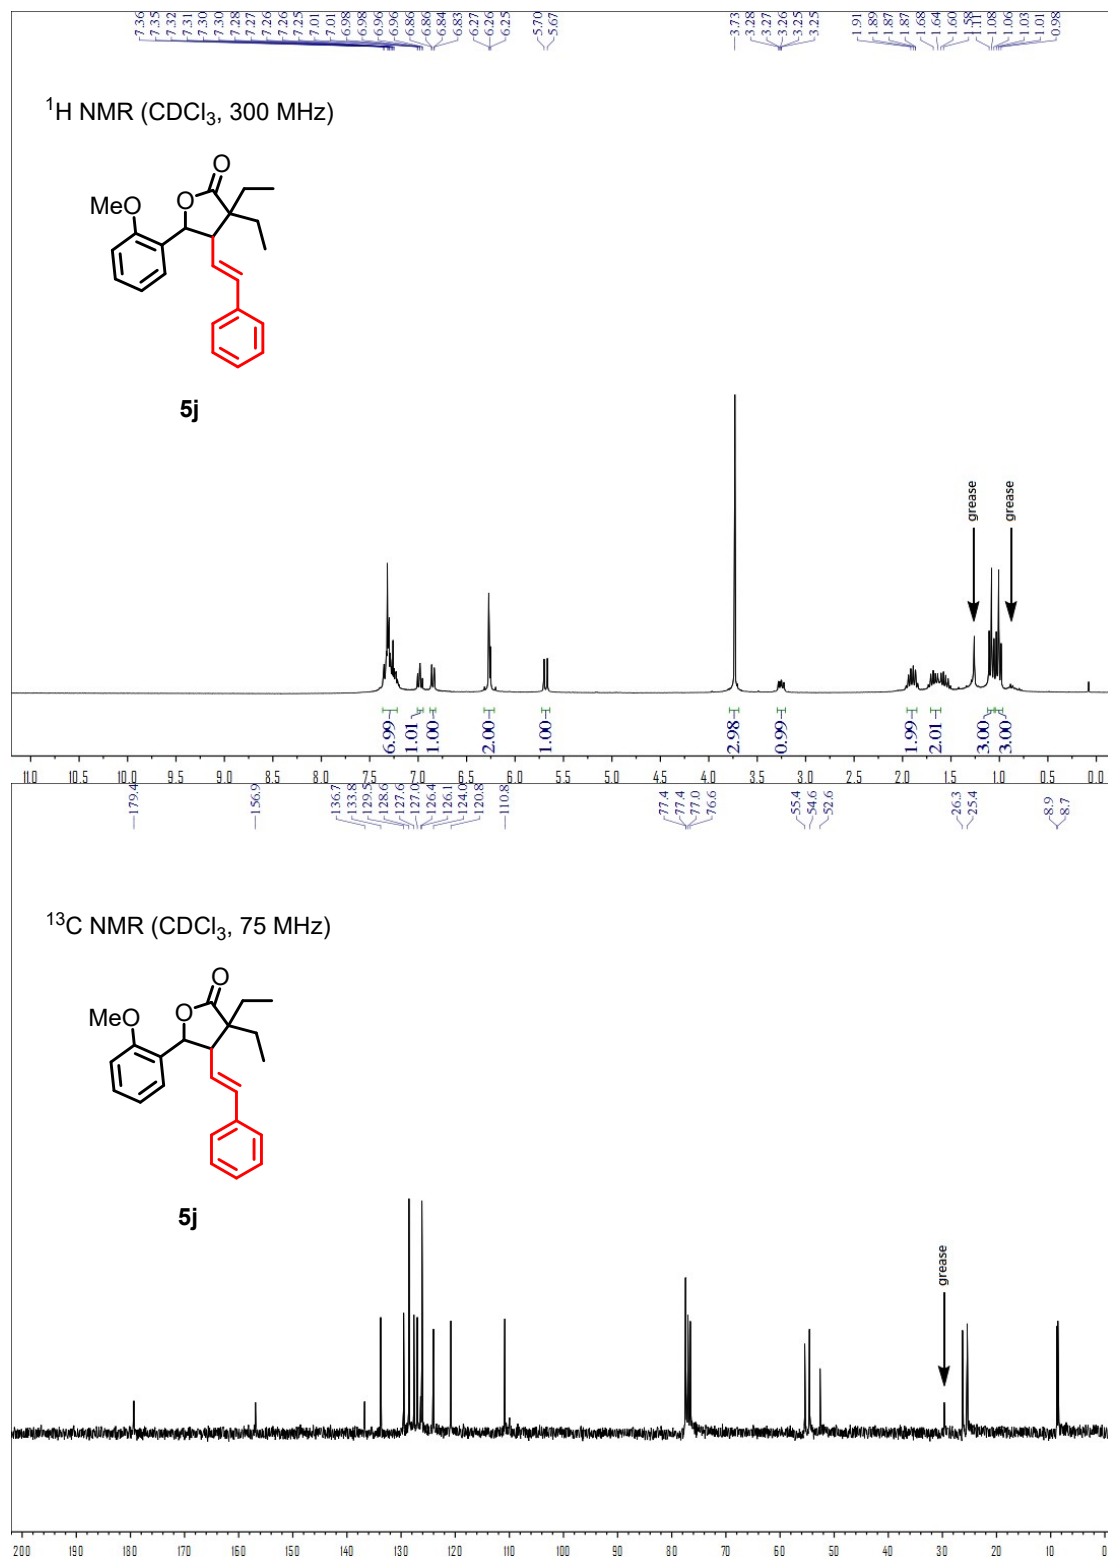

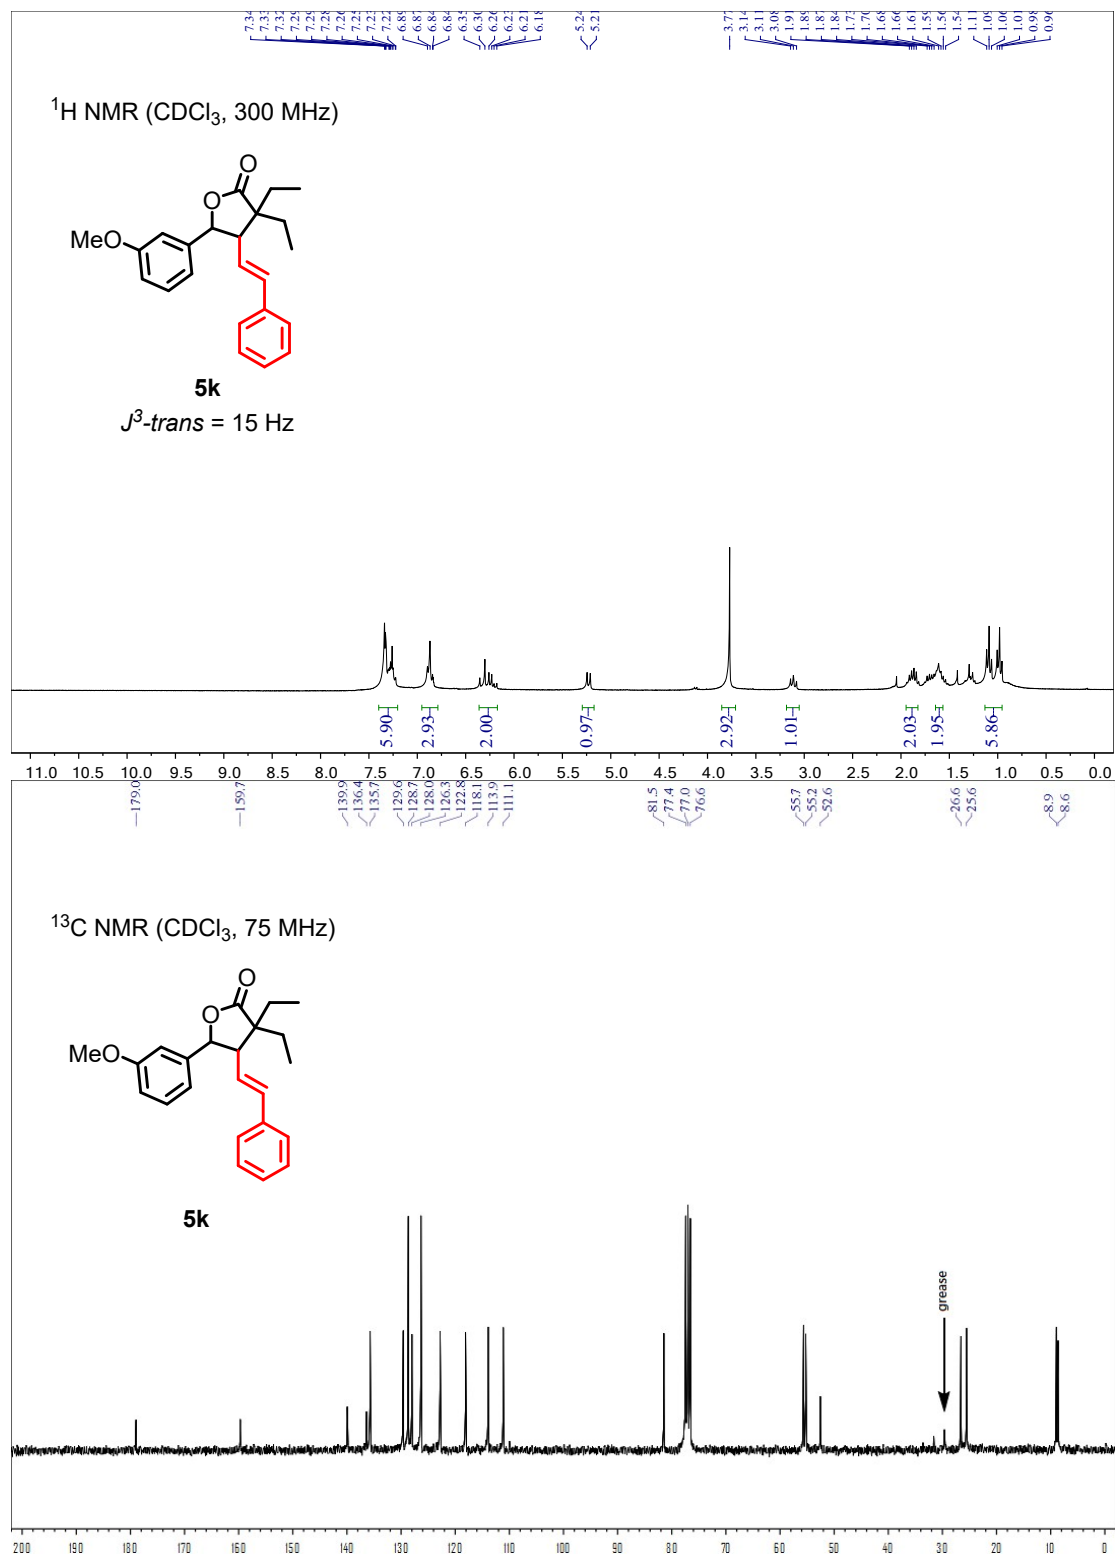

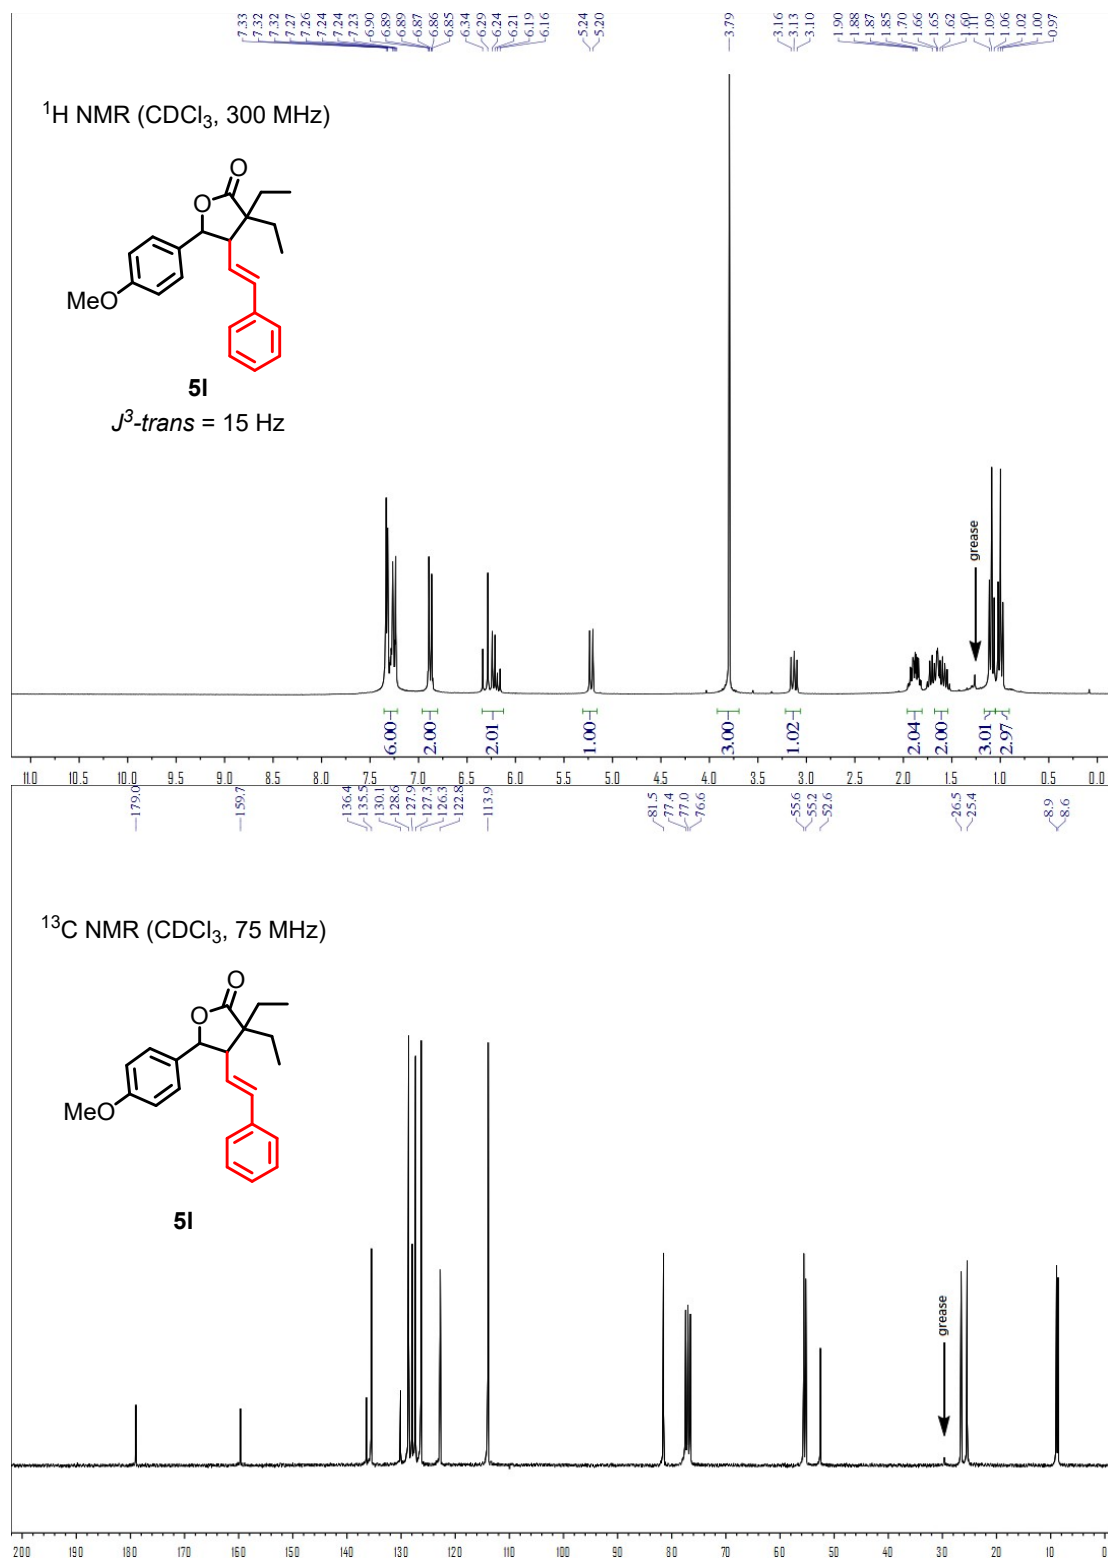

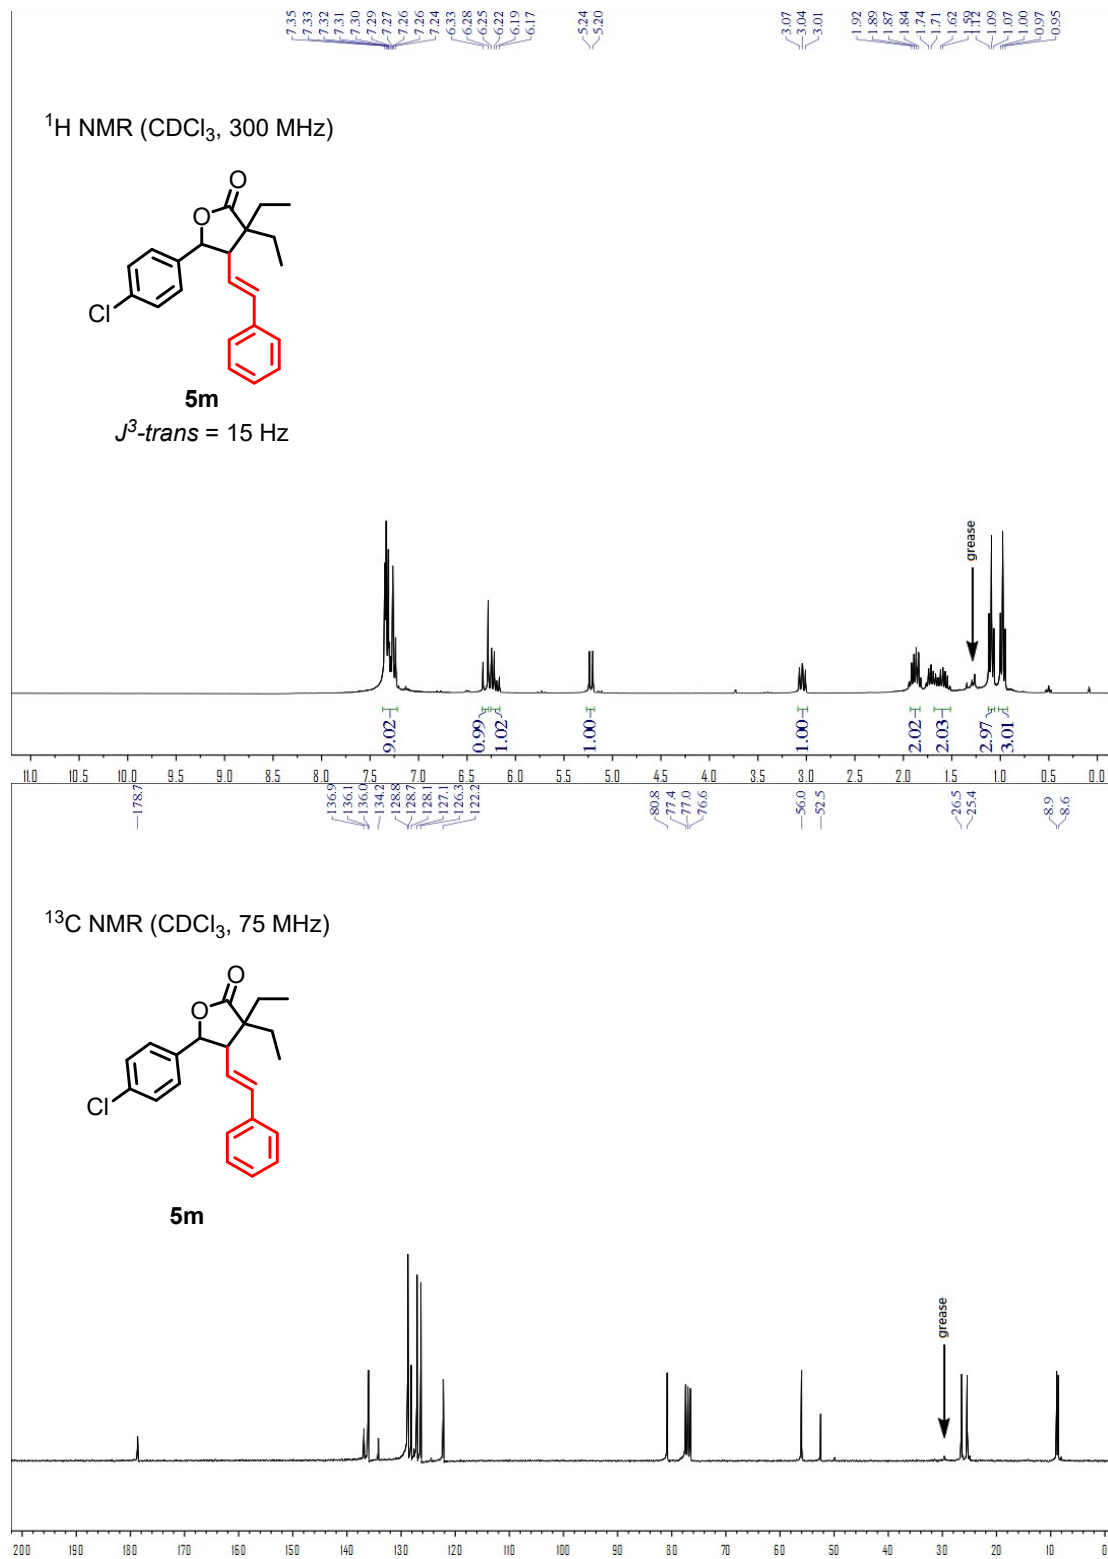

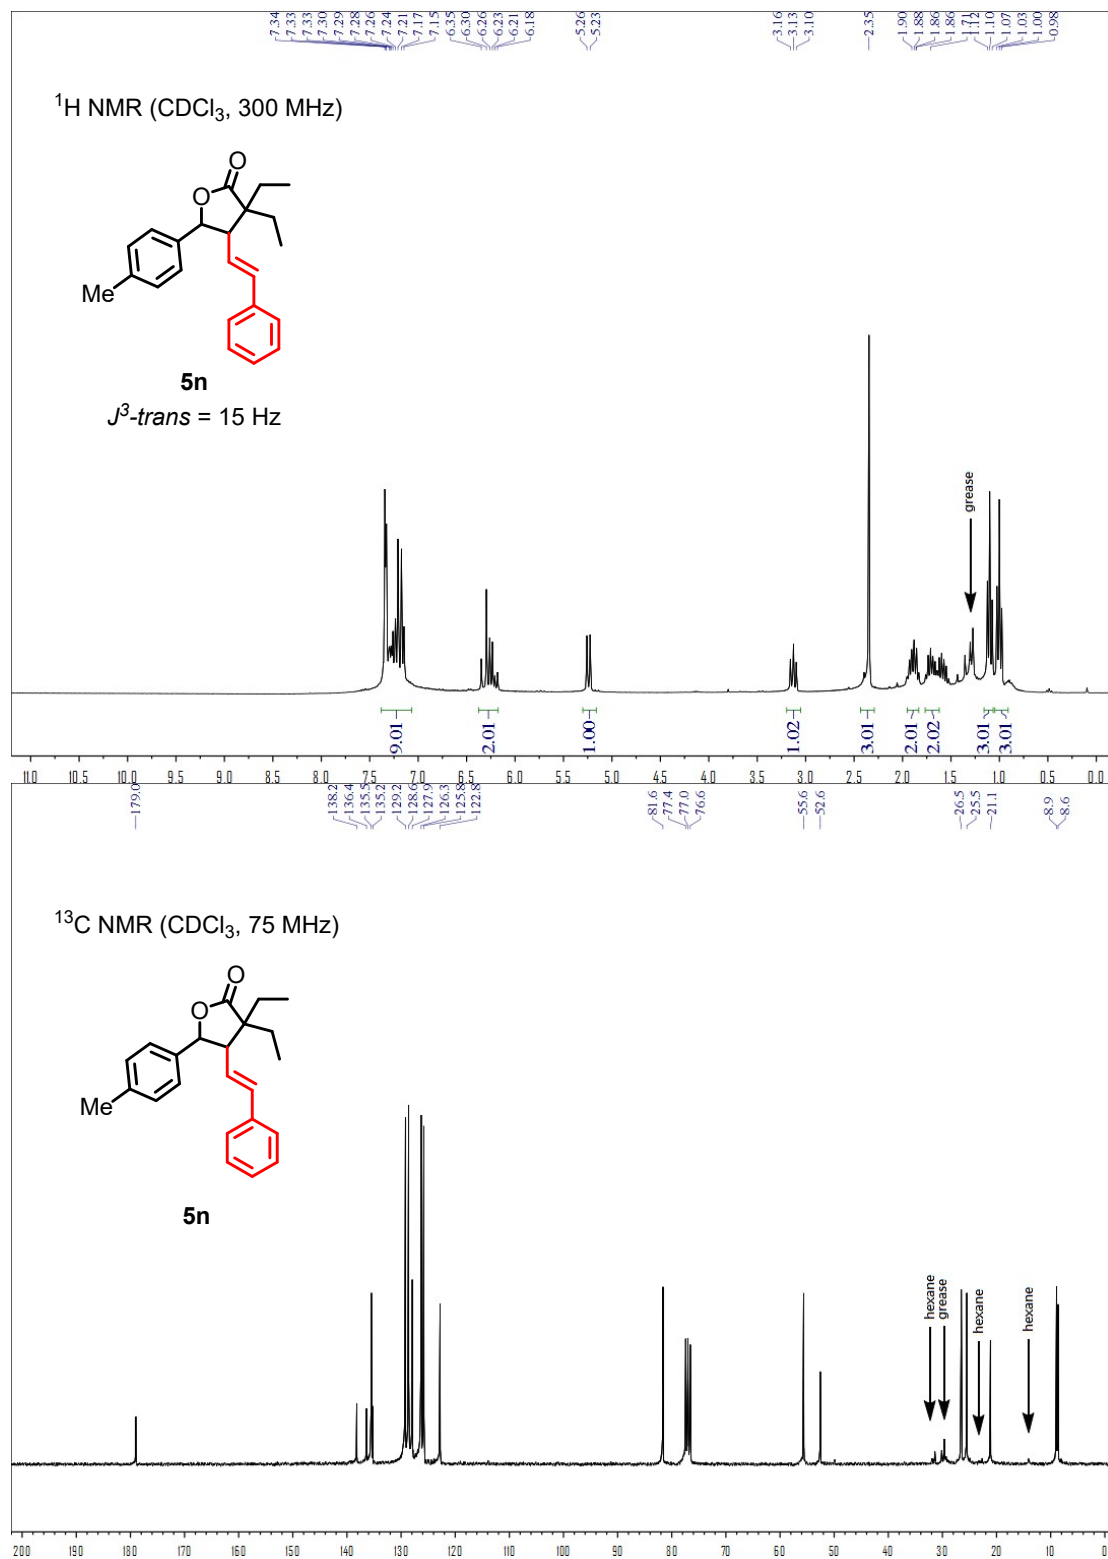



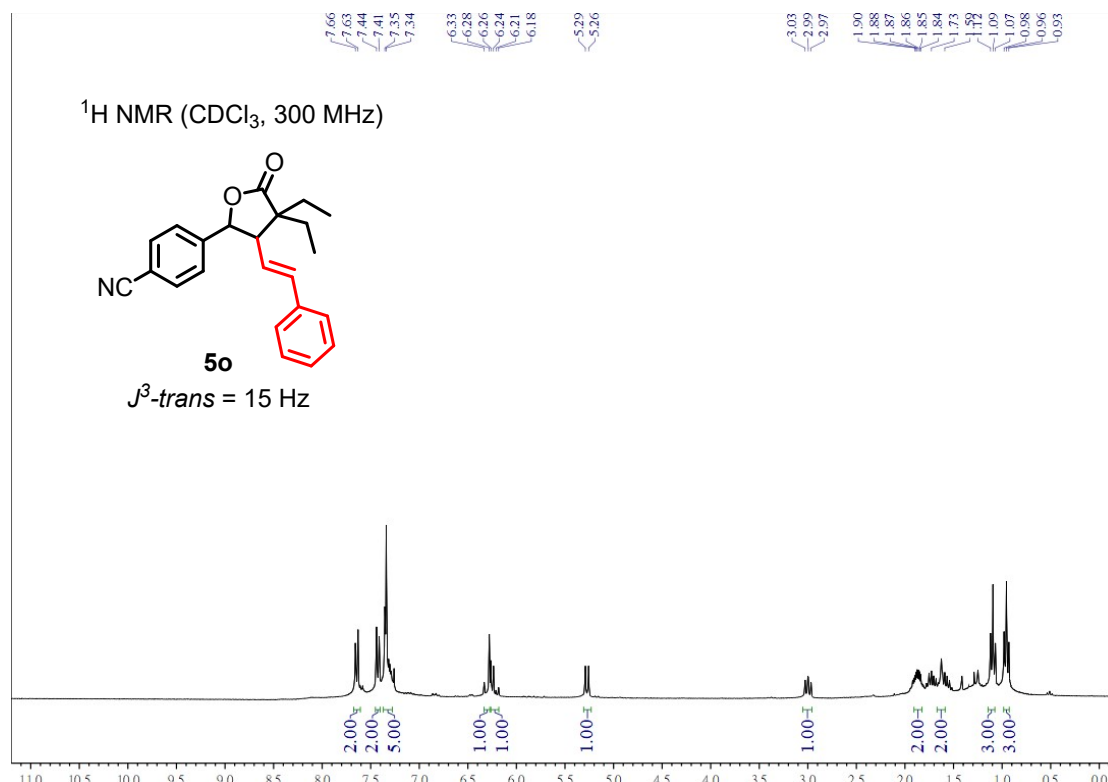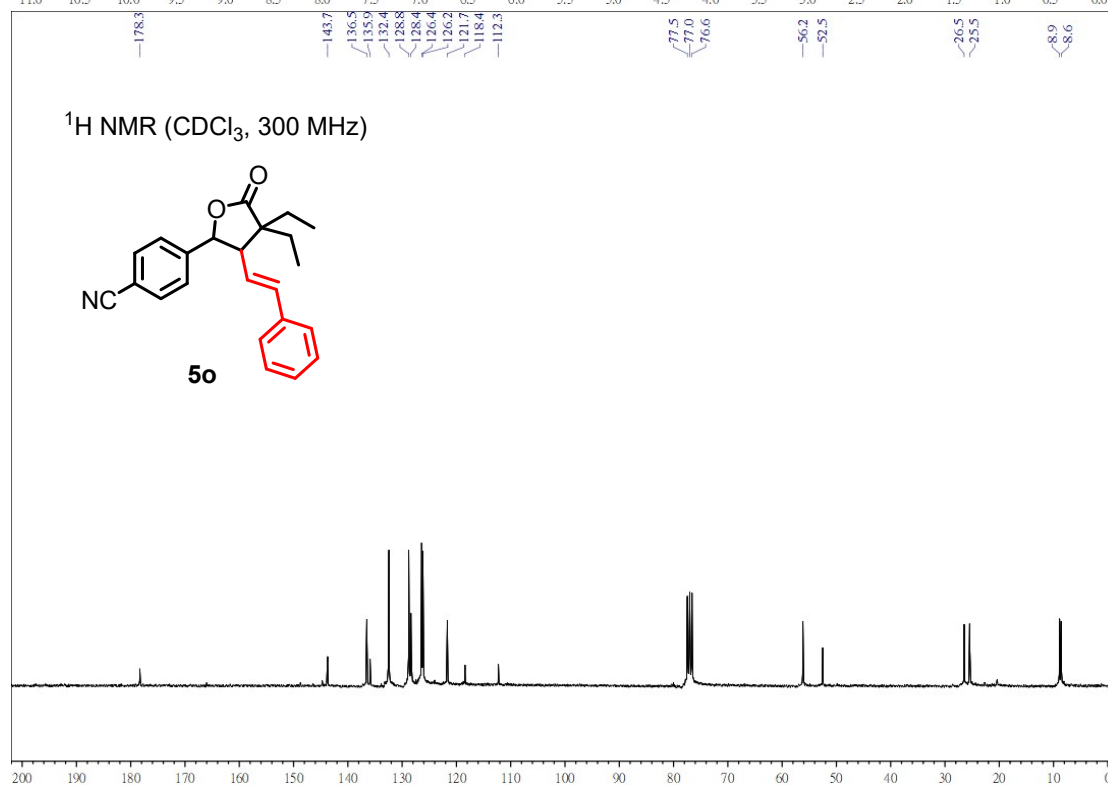

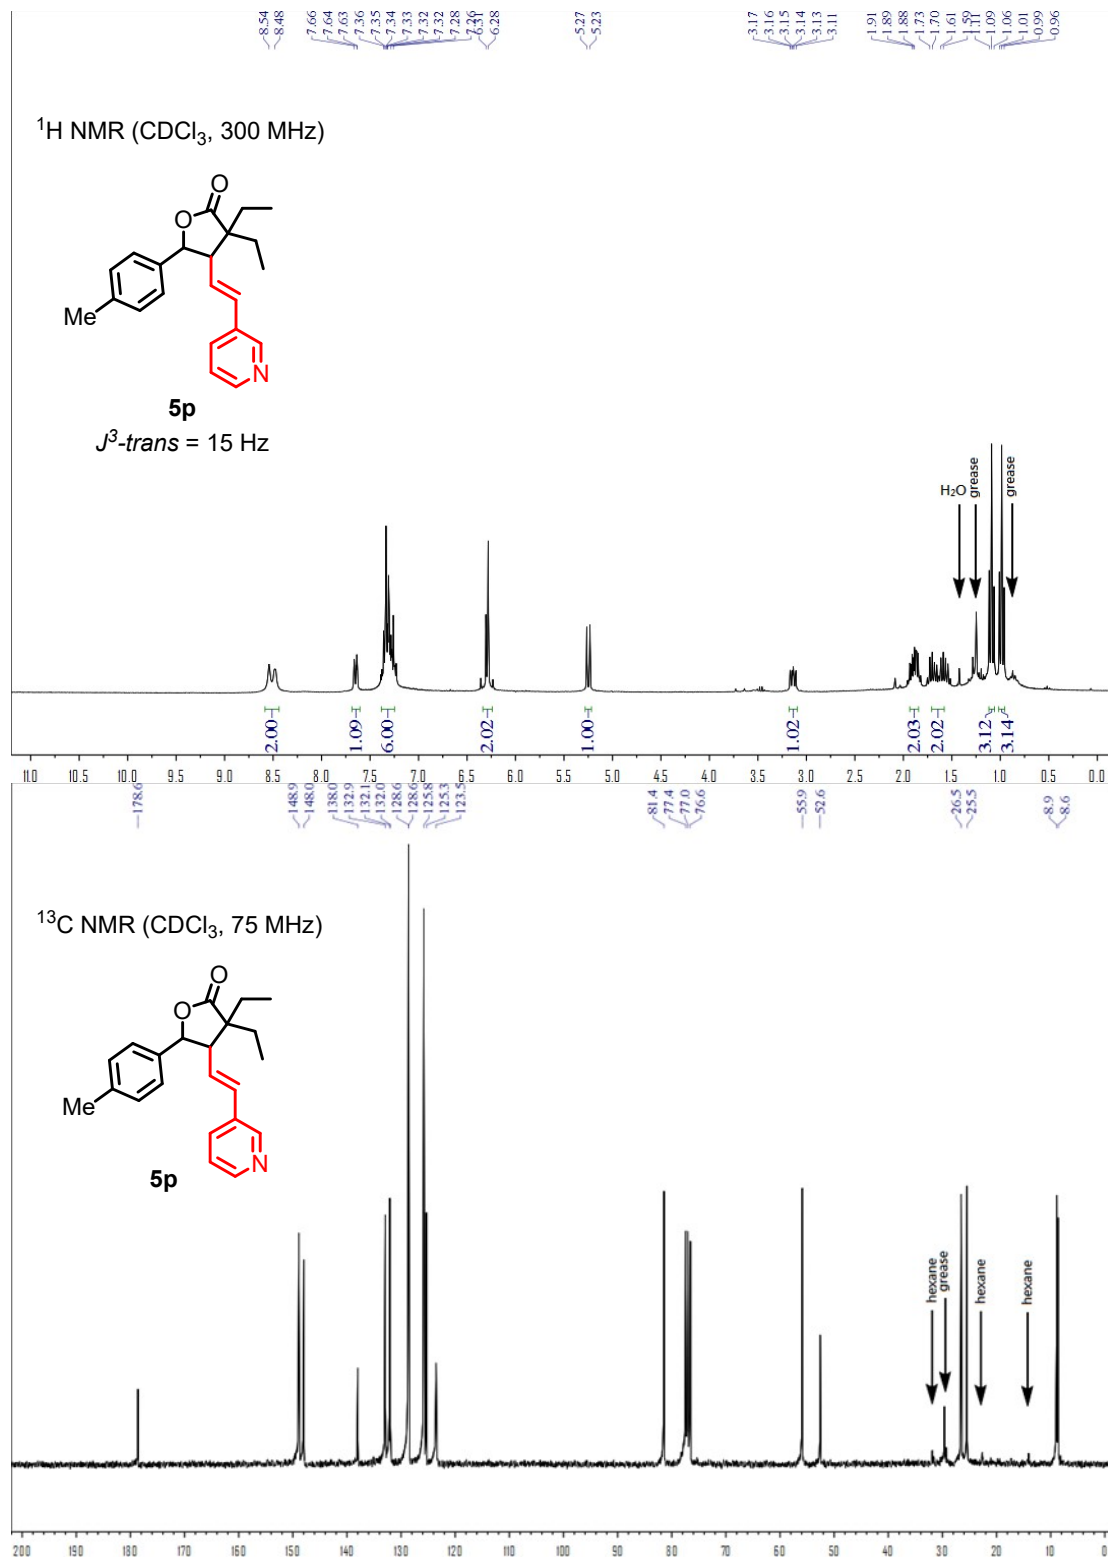

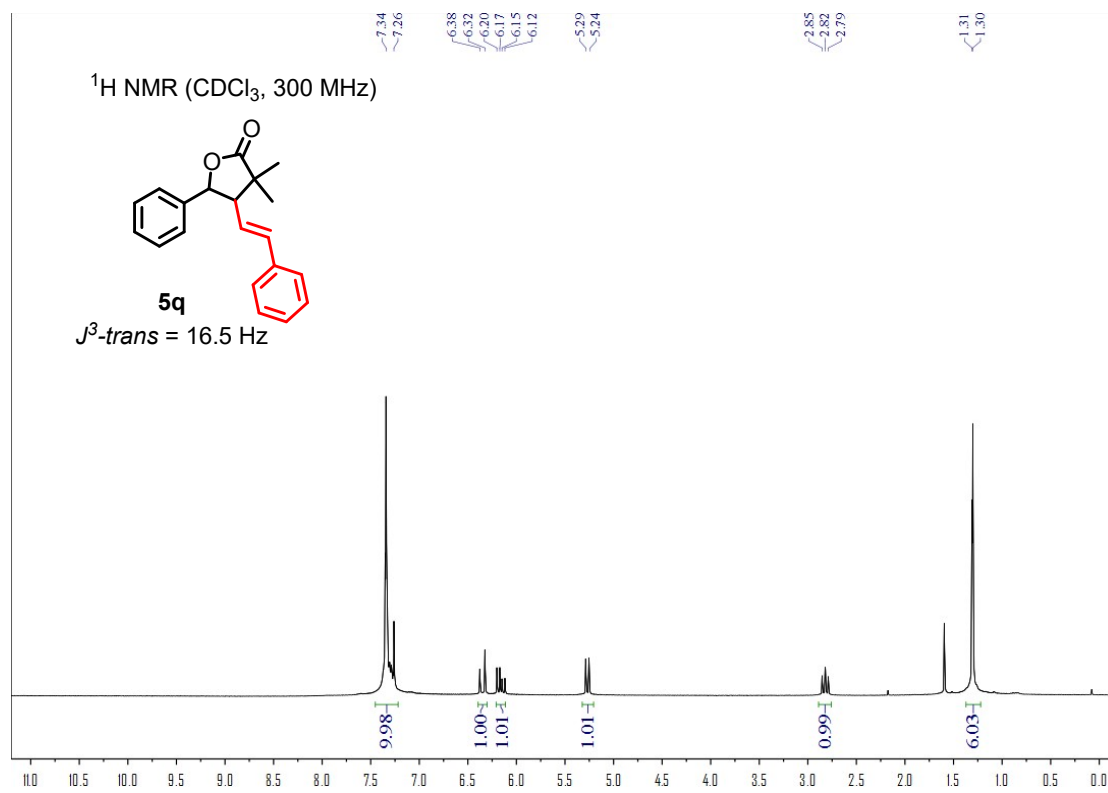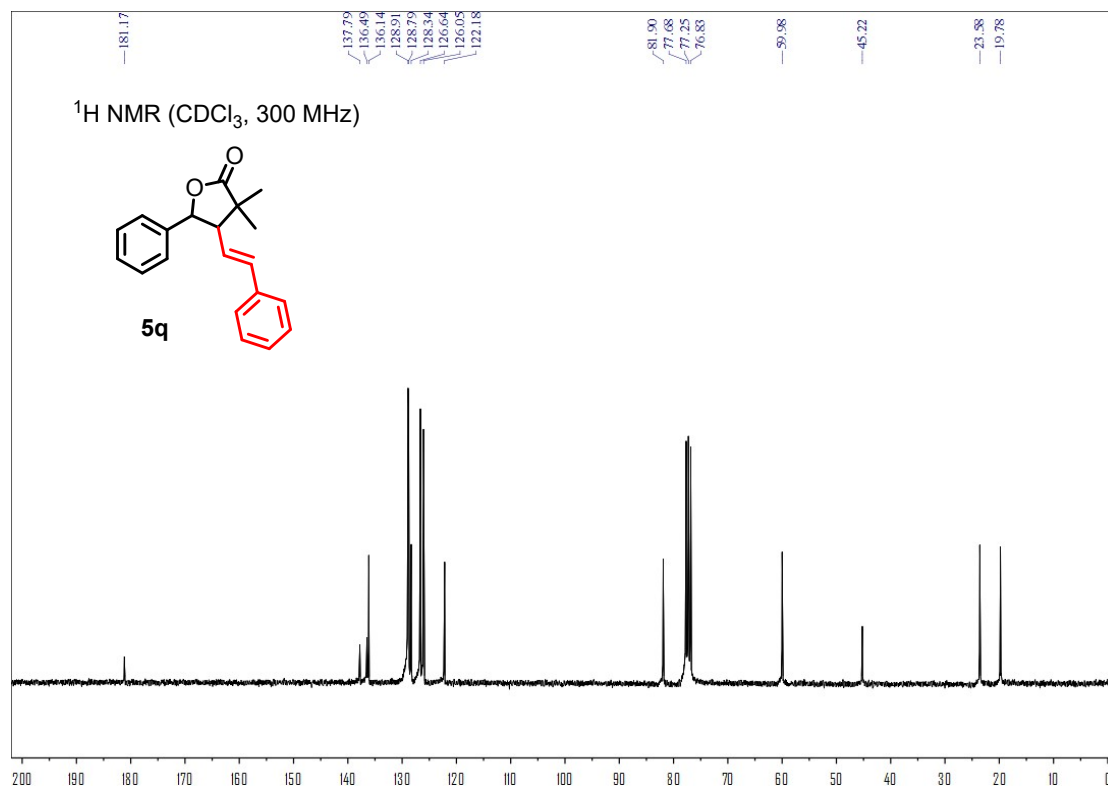

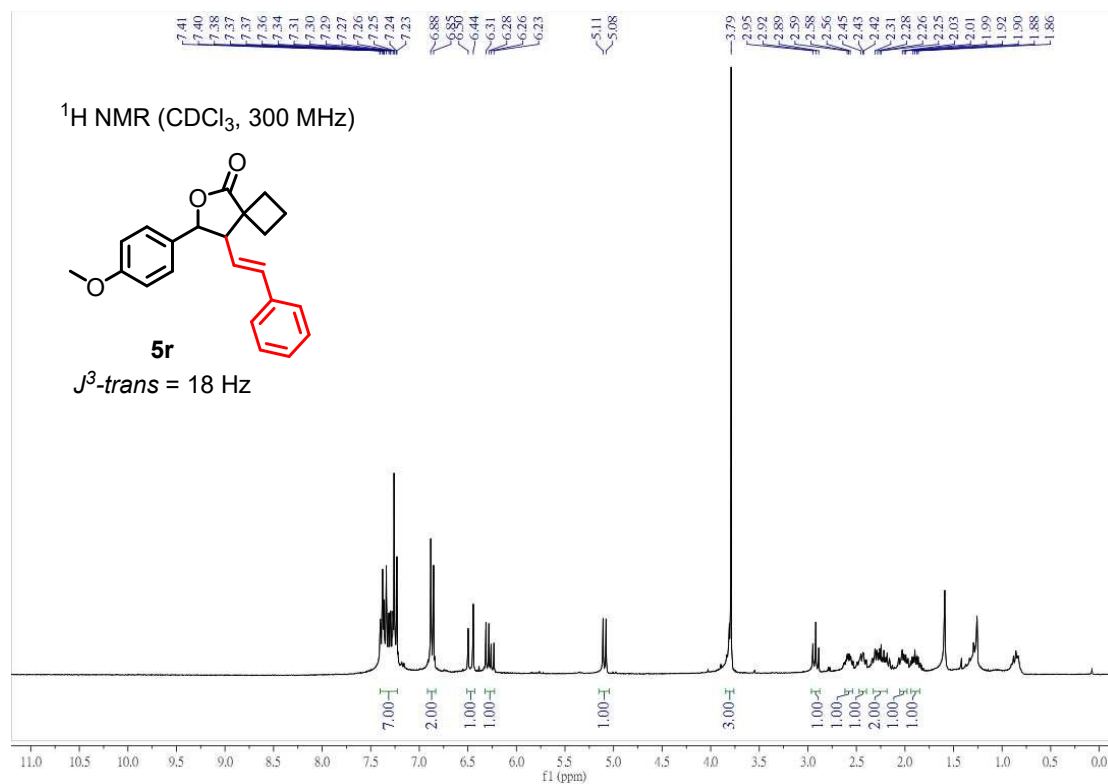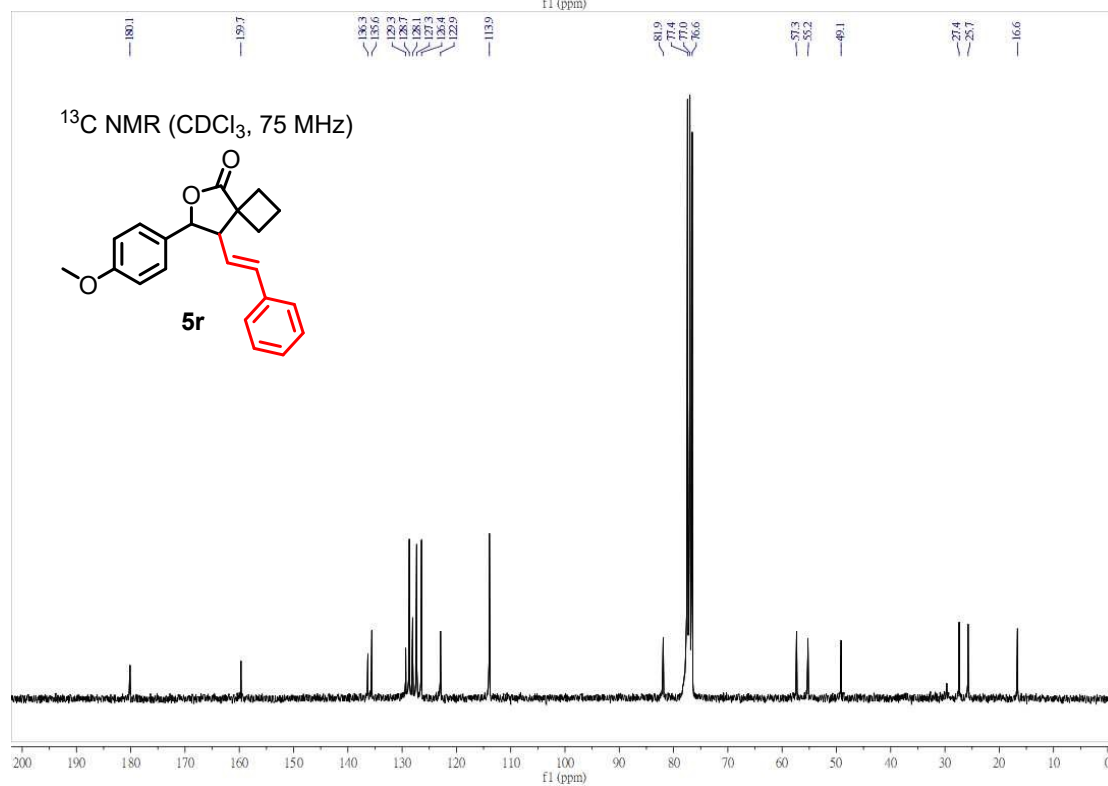

<sup>1</sup>H NMR (CDCl<sub>3</sub>, 300 MHz)

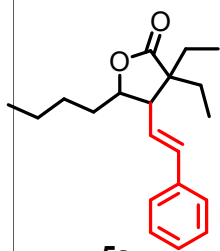

**5s**

*J*<sup>3-trans</sup> = 15 Hz

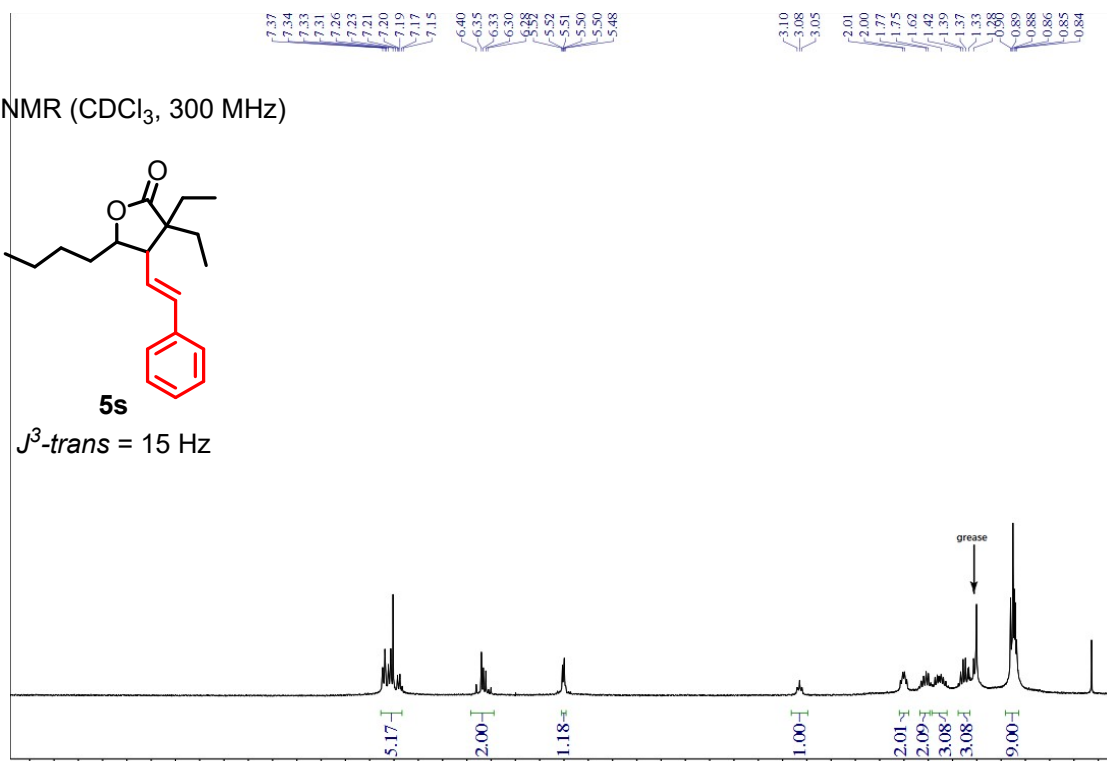

<sup>13</sup>C NMR (CDCl<sub>3</sub>, 75 MHz)

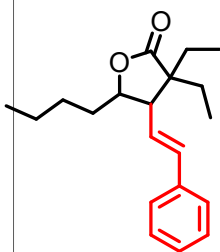

**5s**

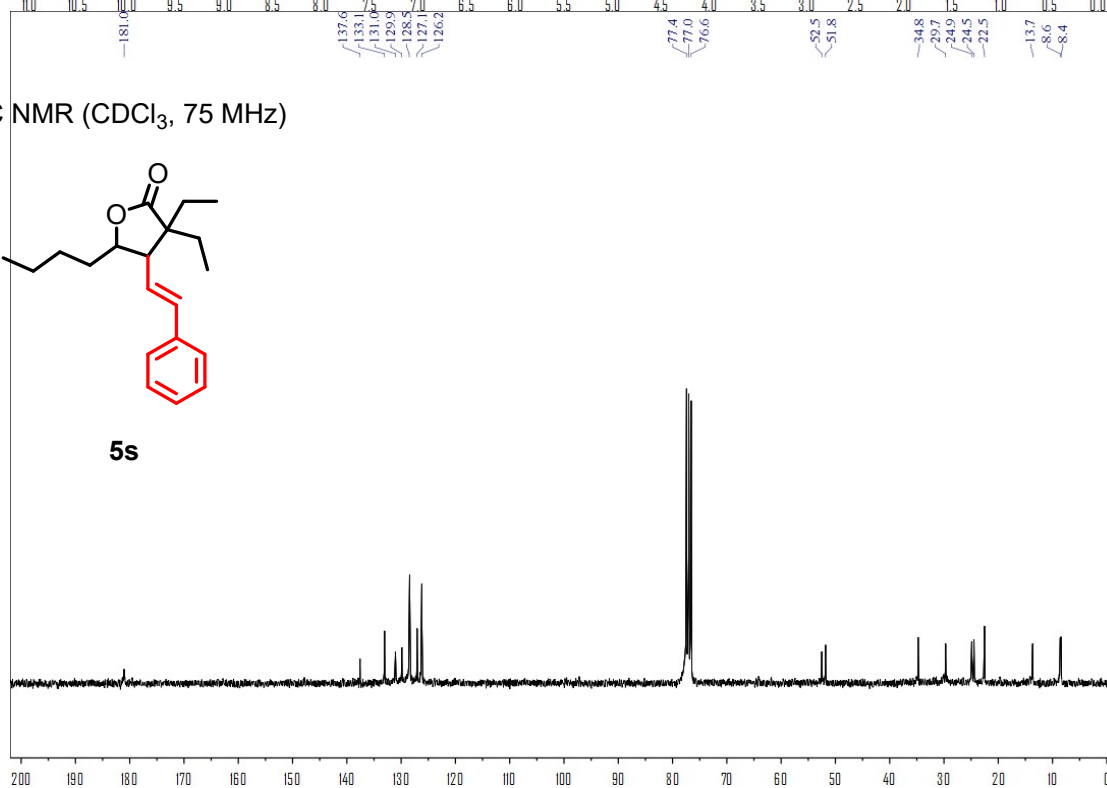

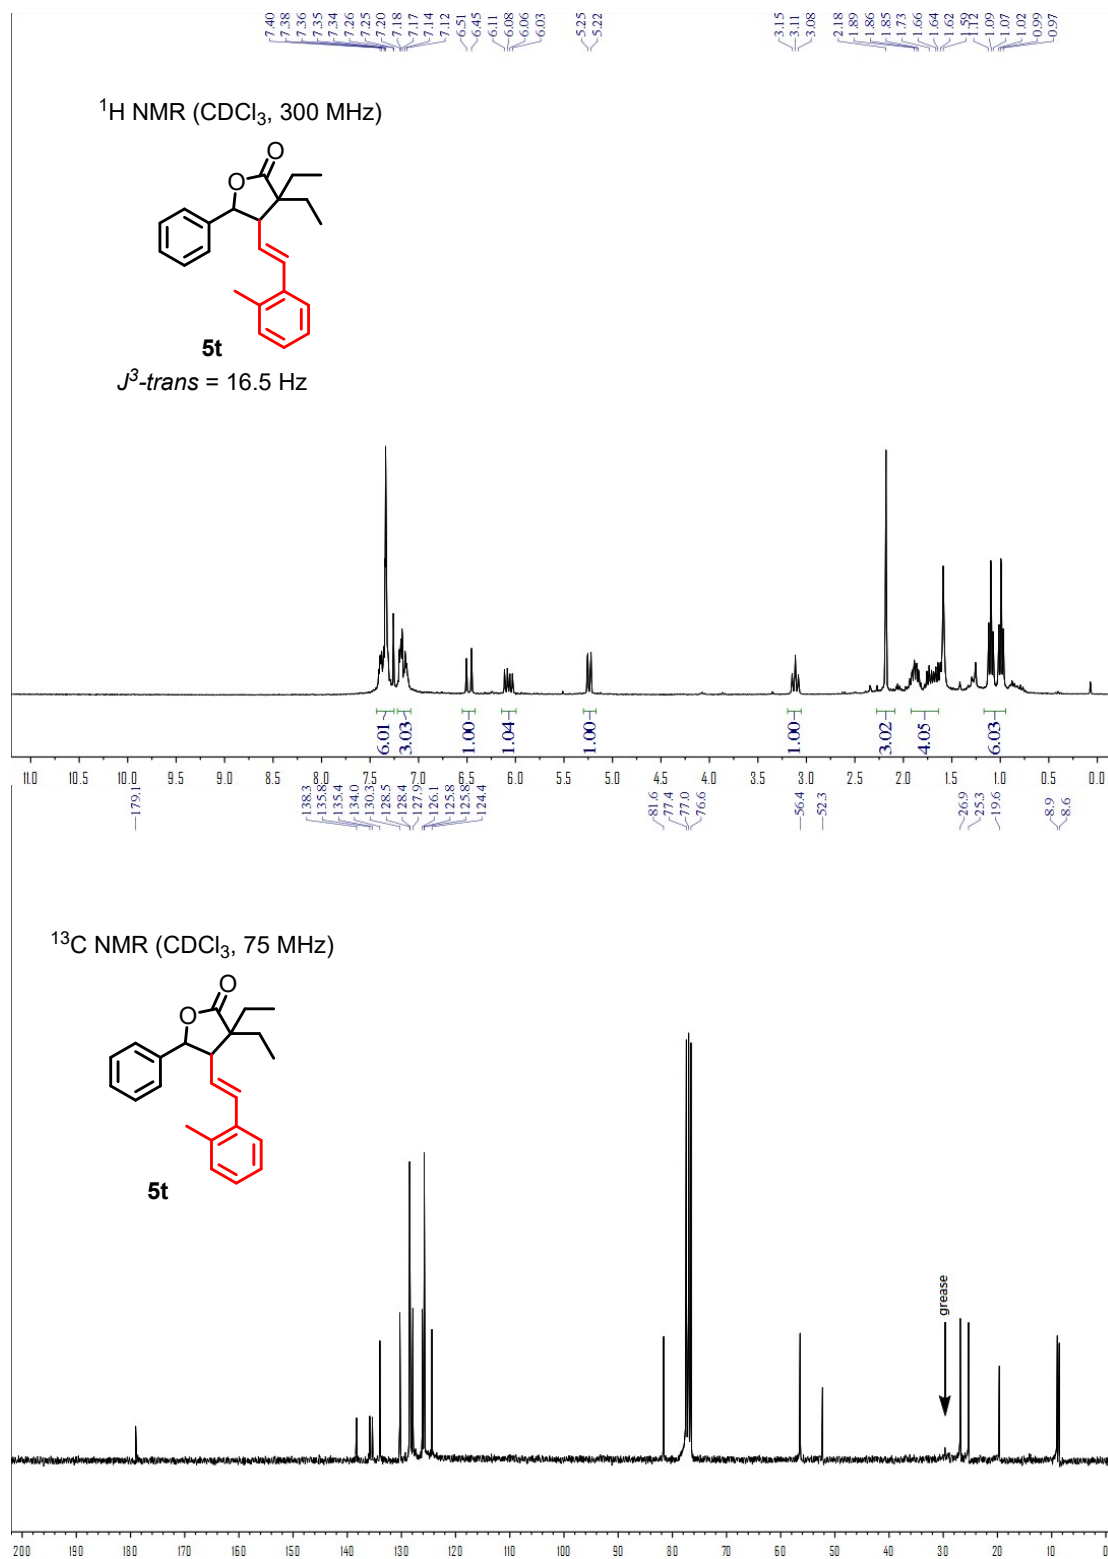

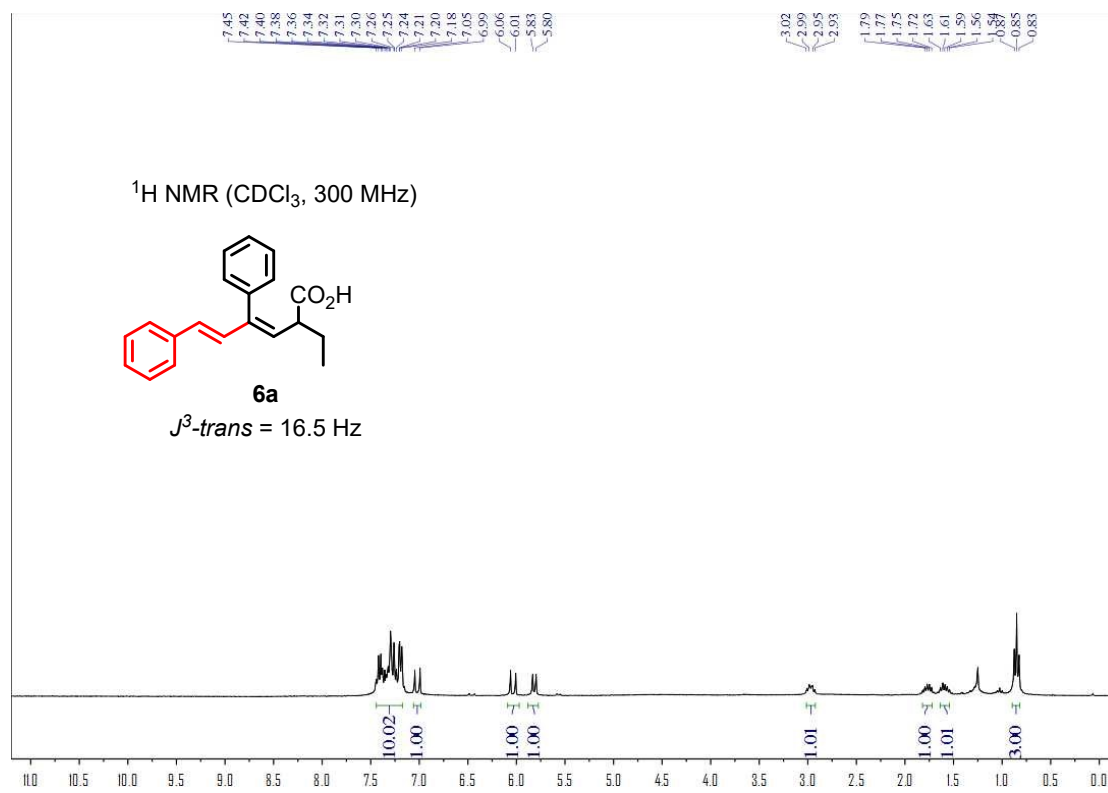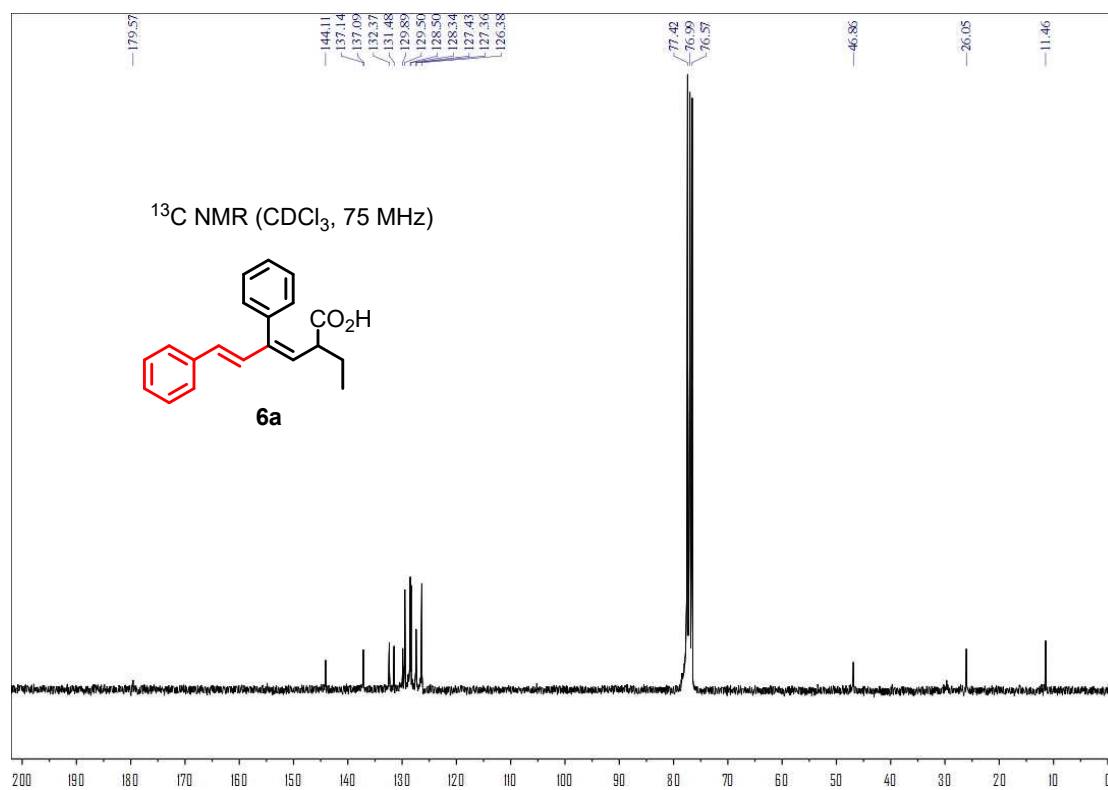

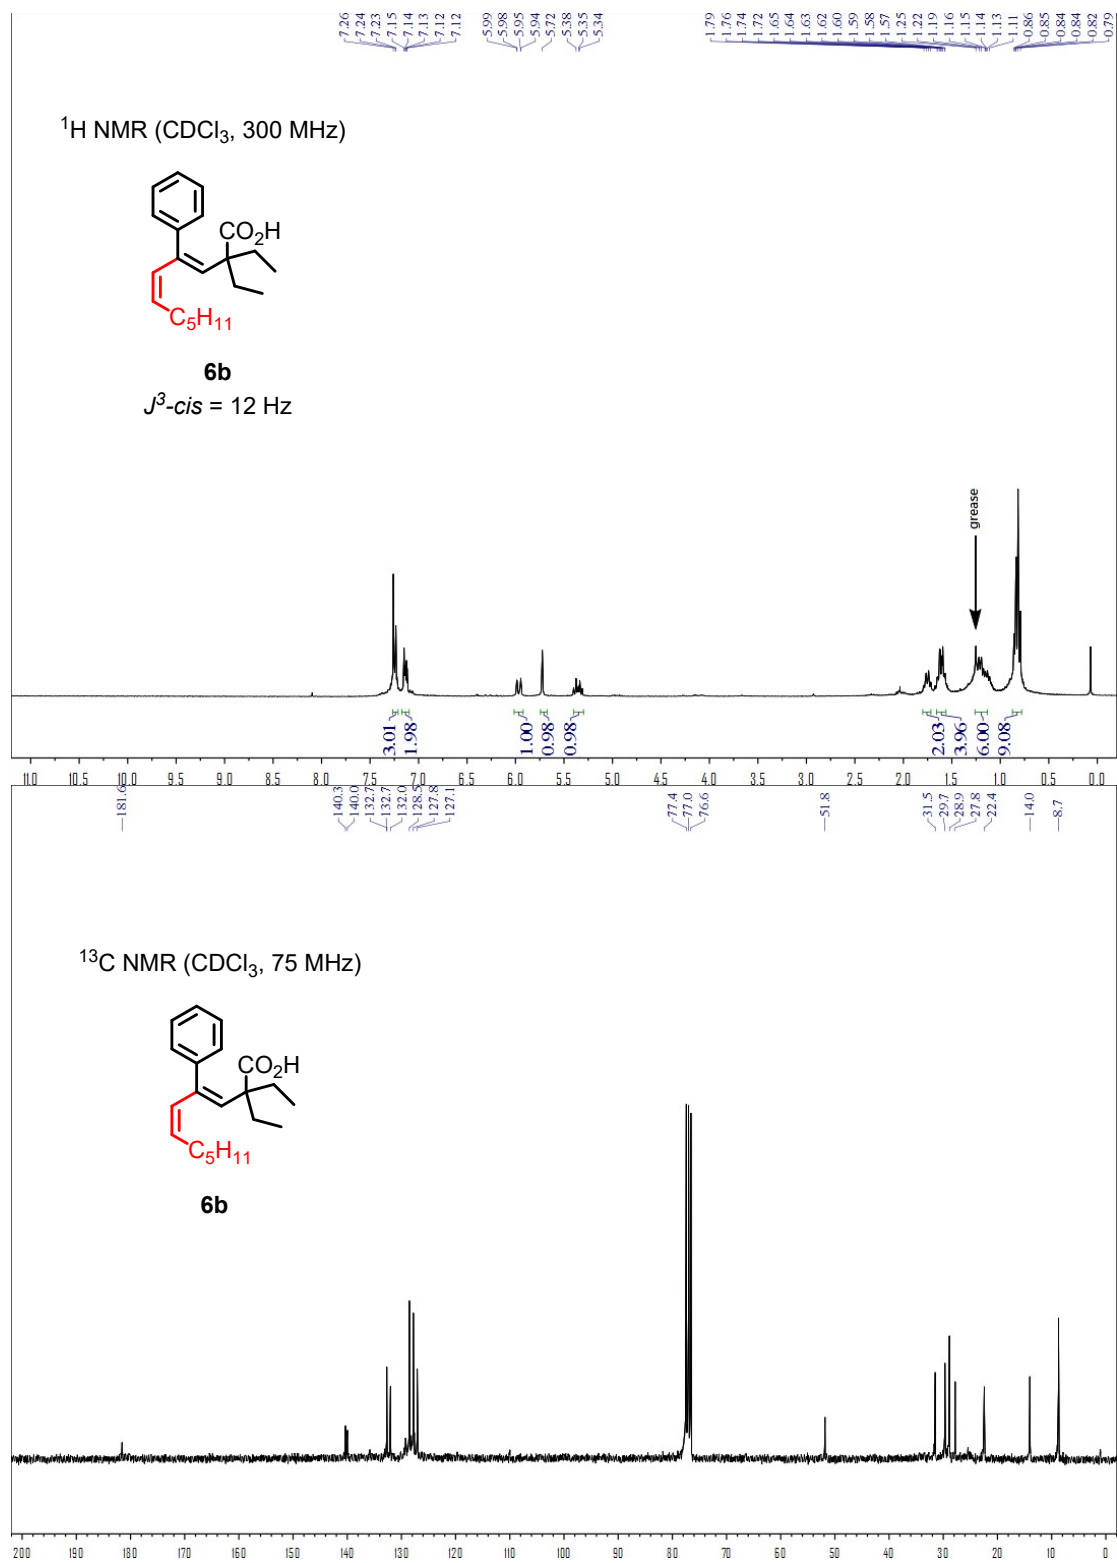



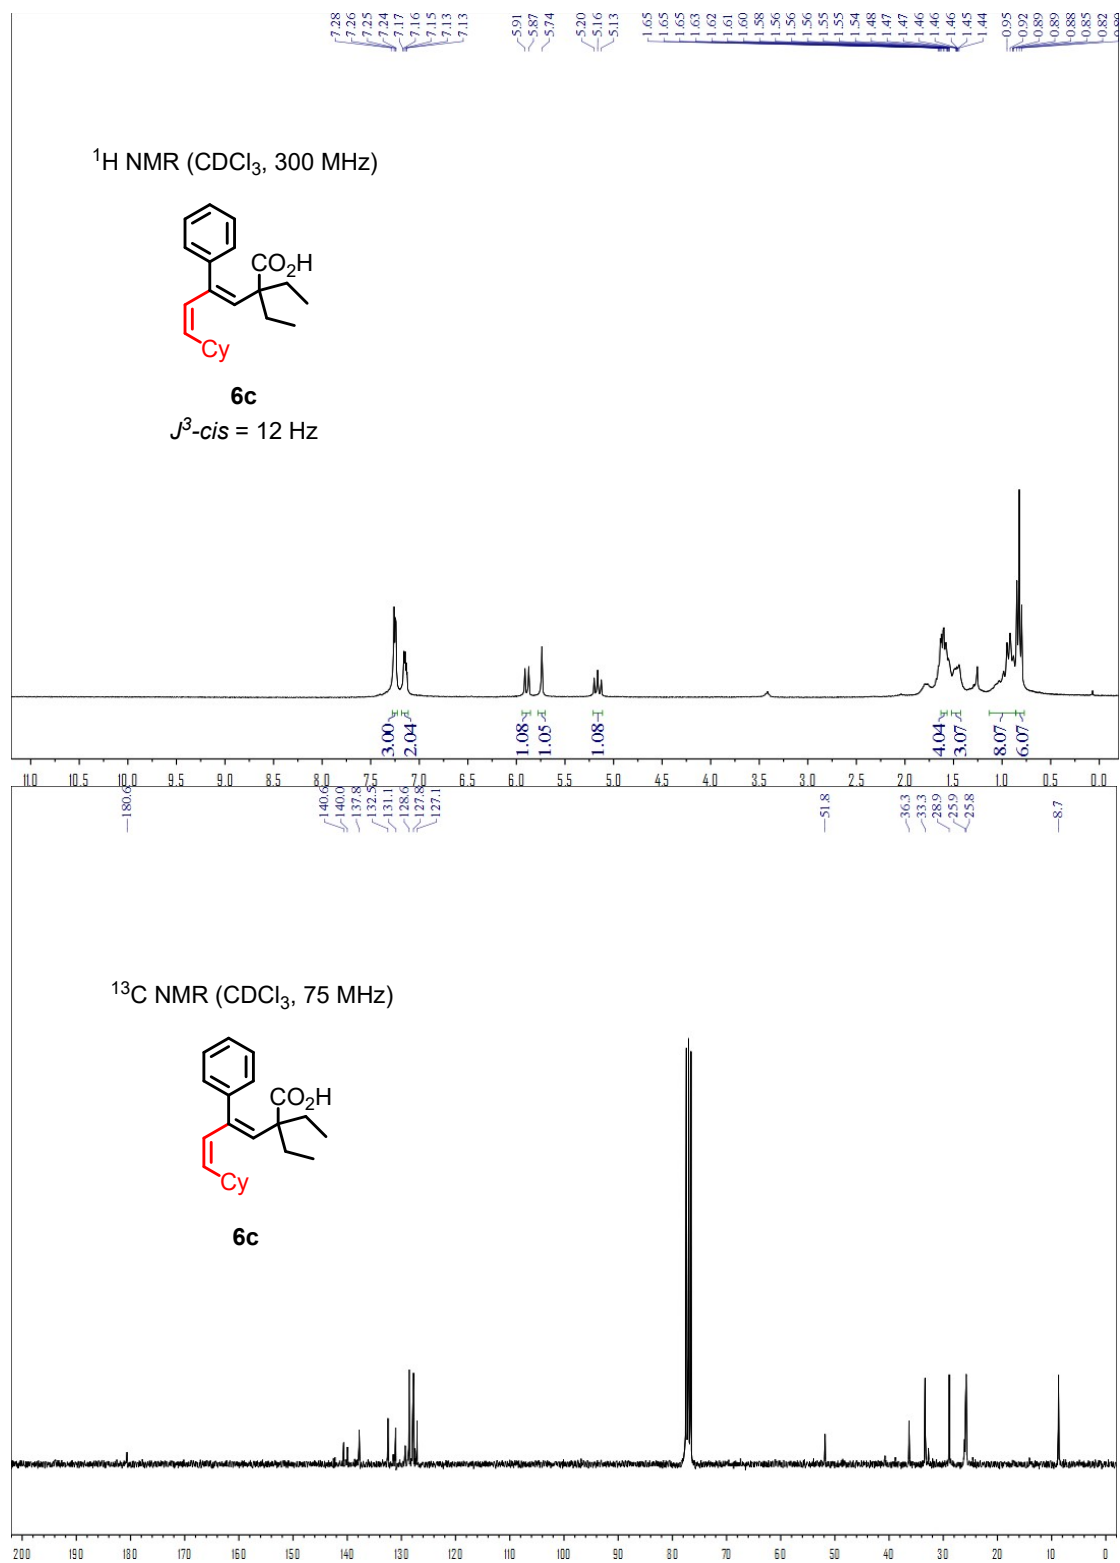

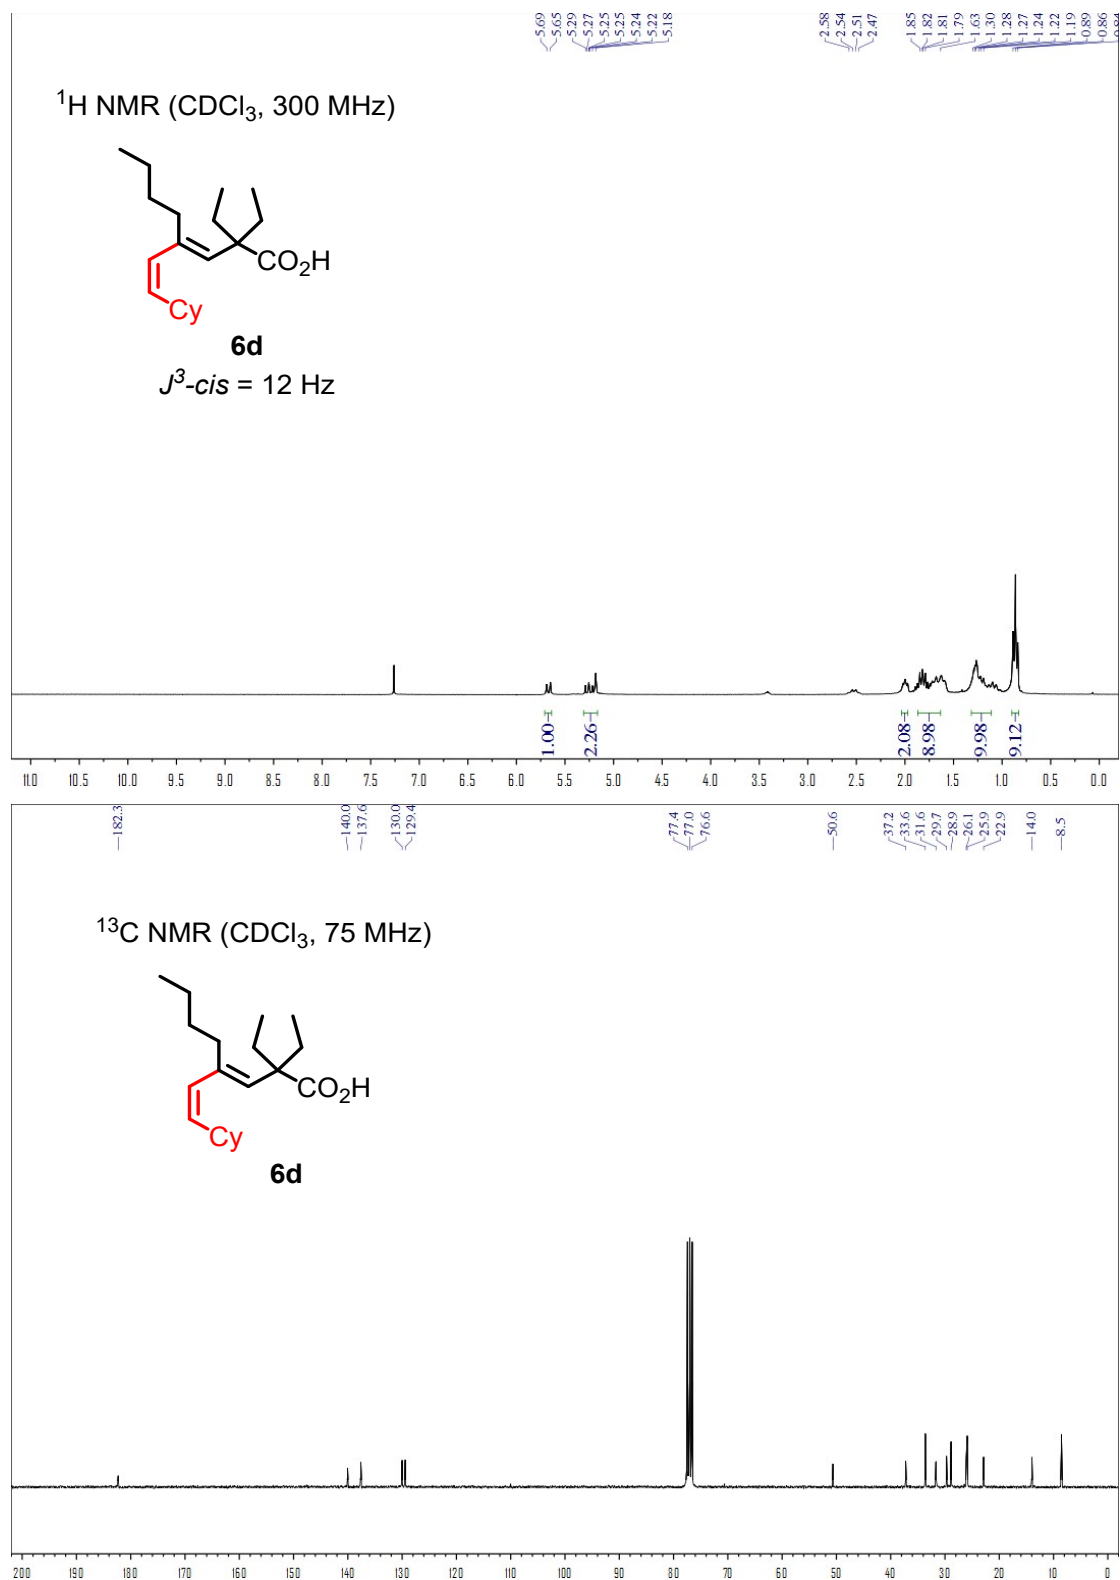

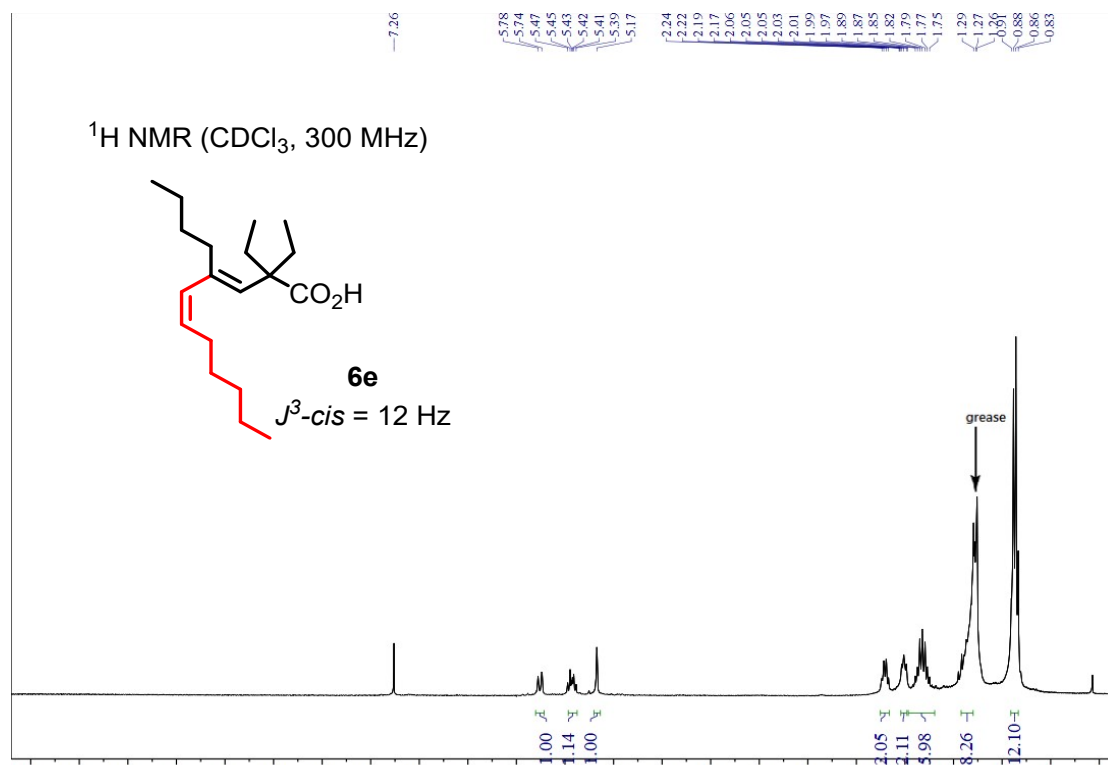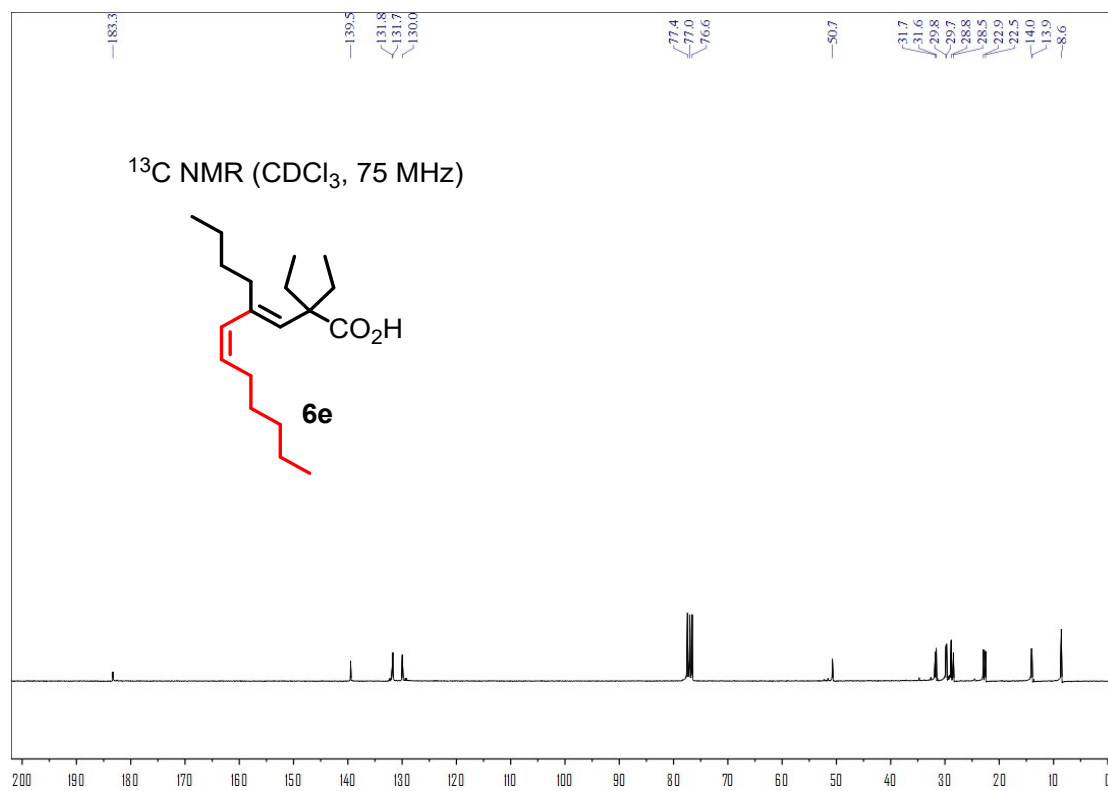

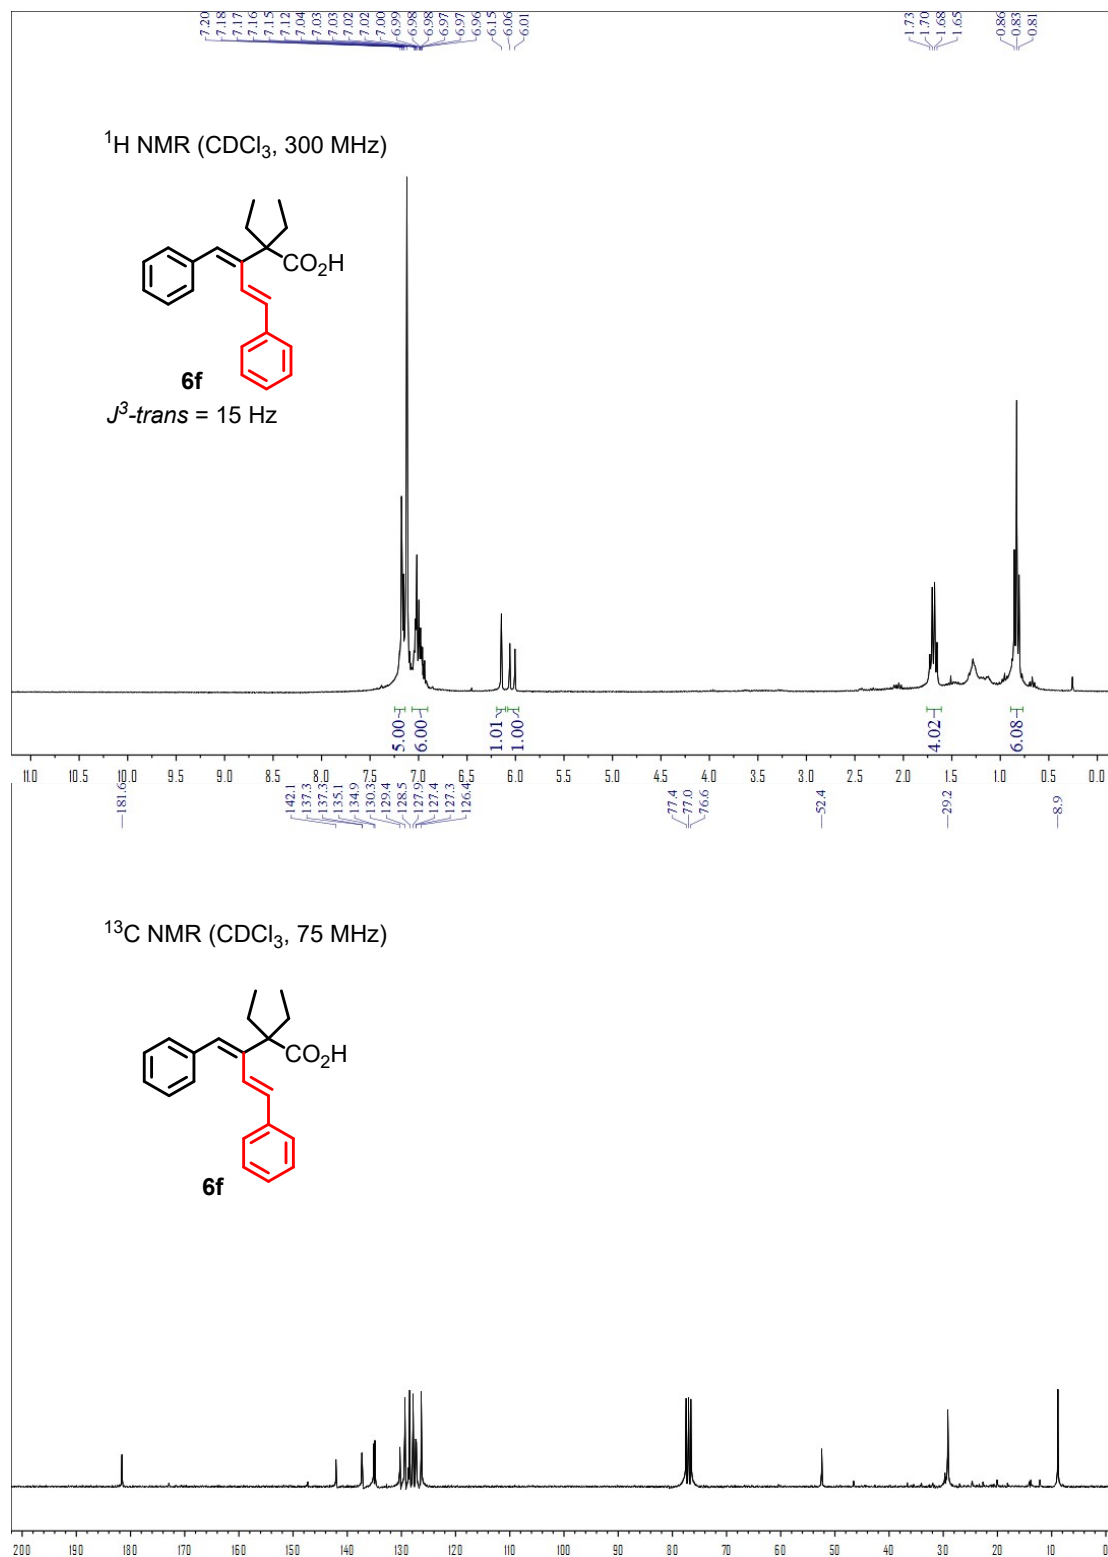

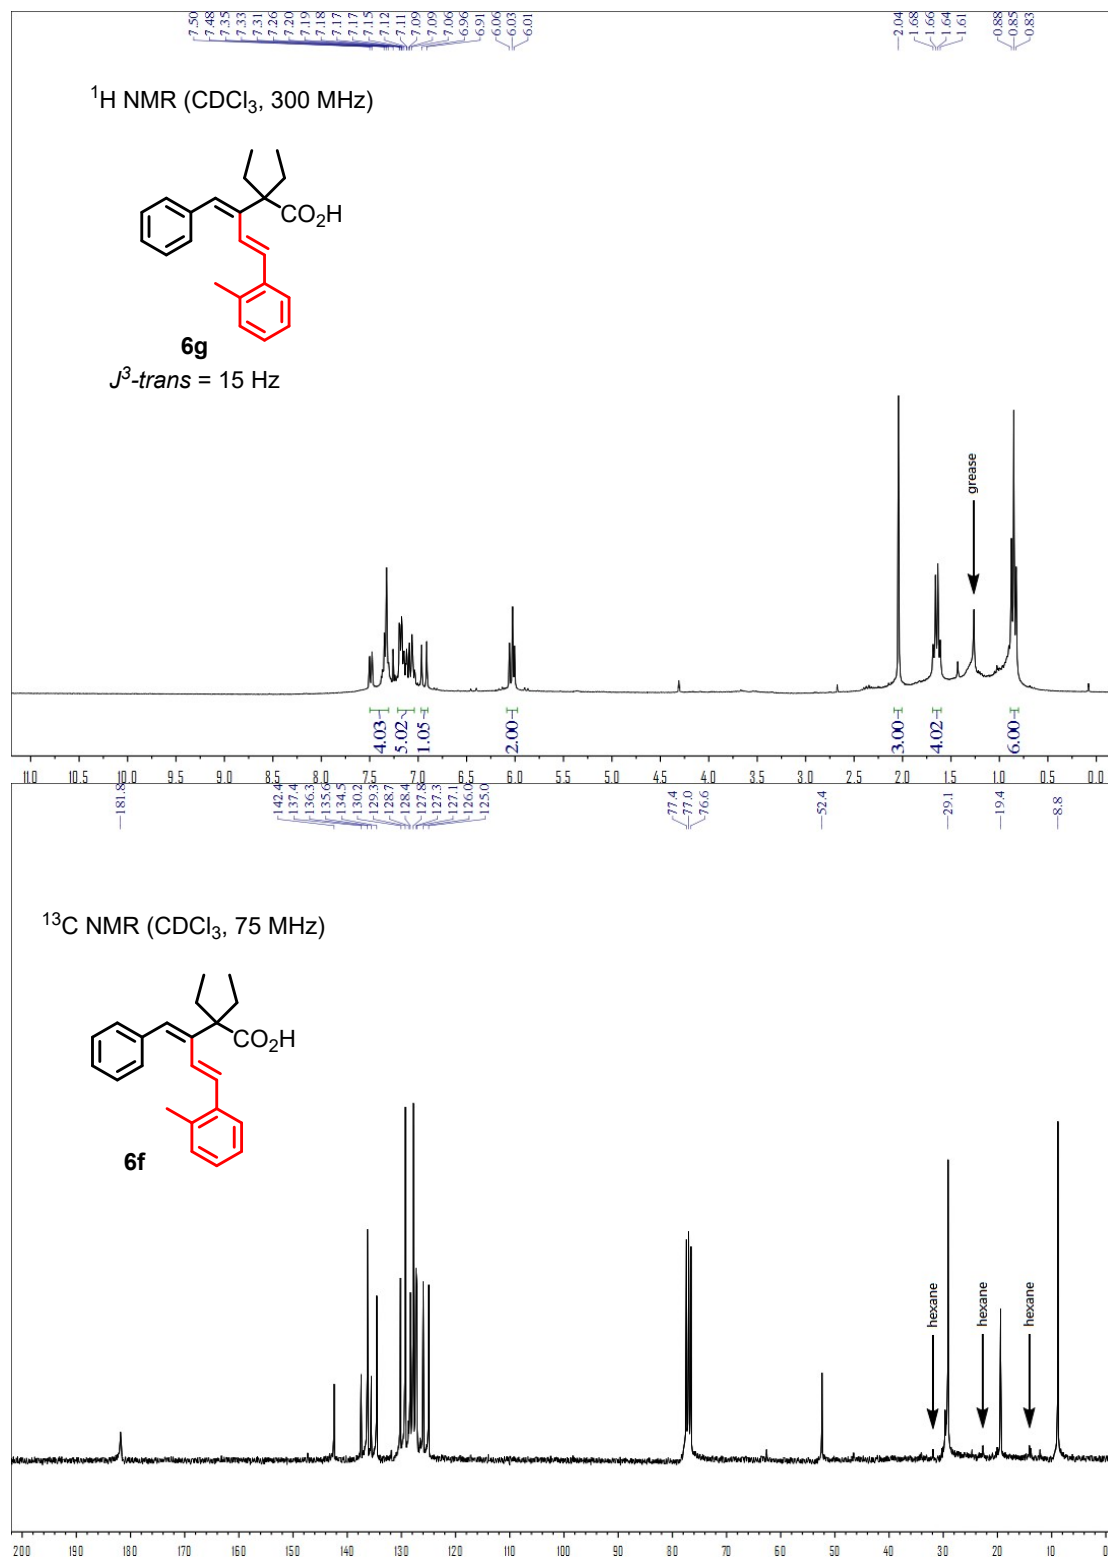

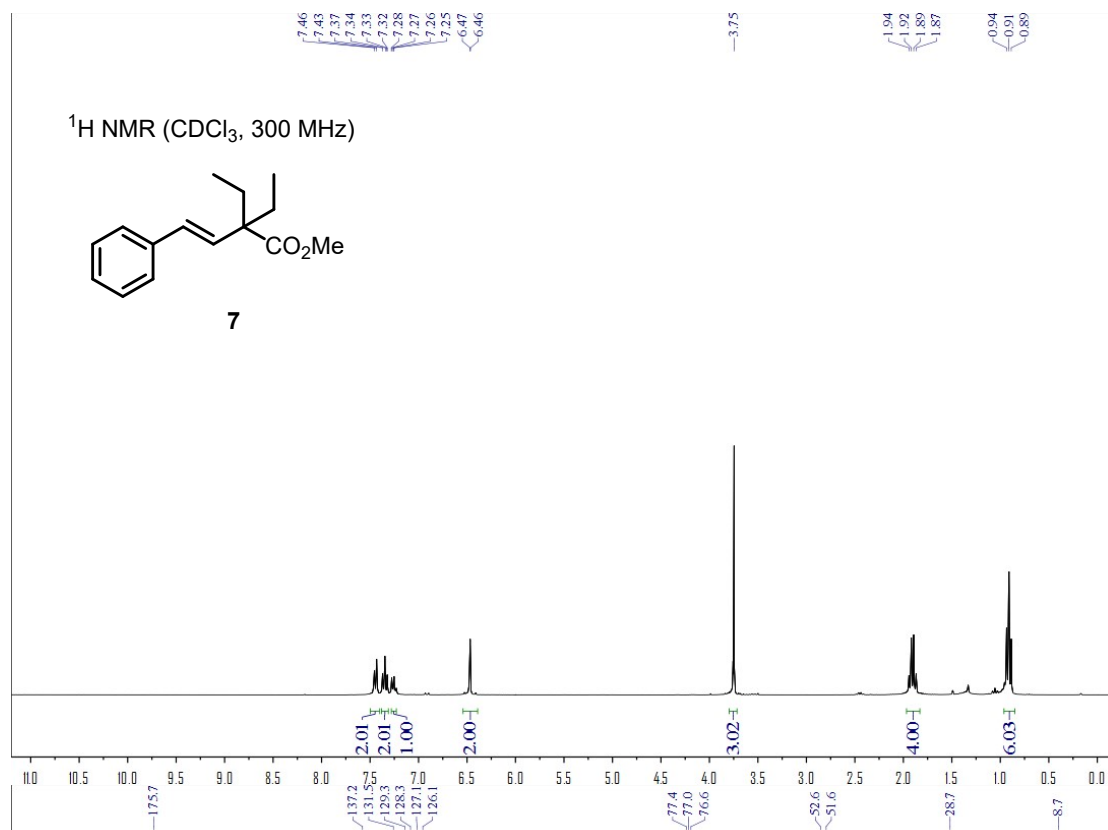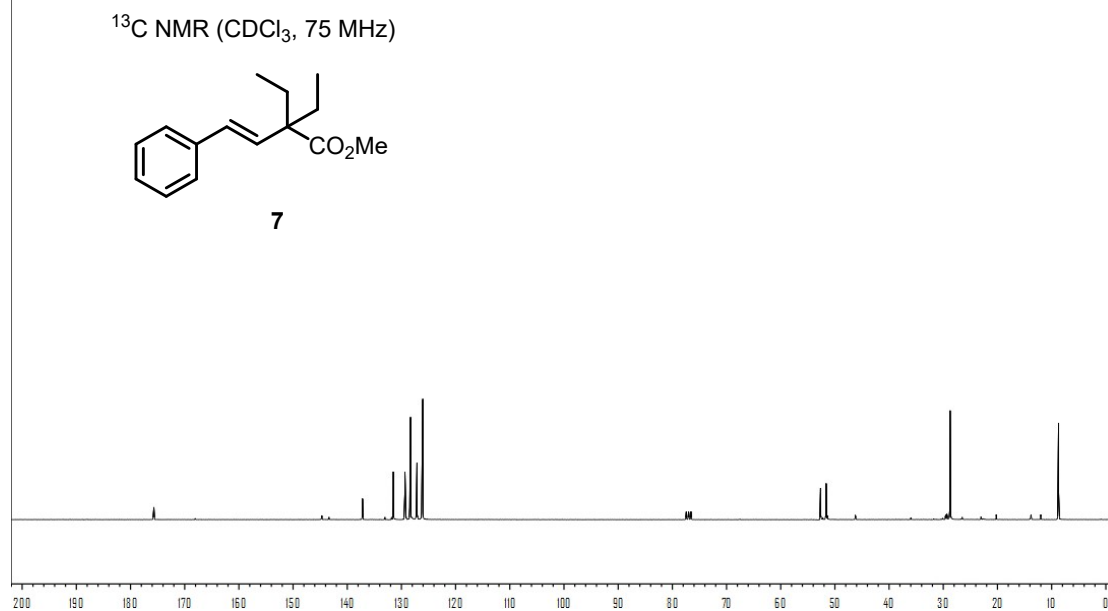

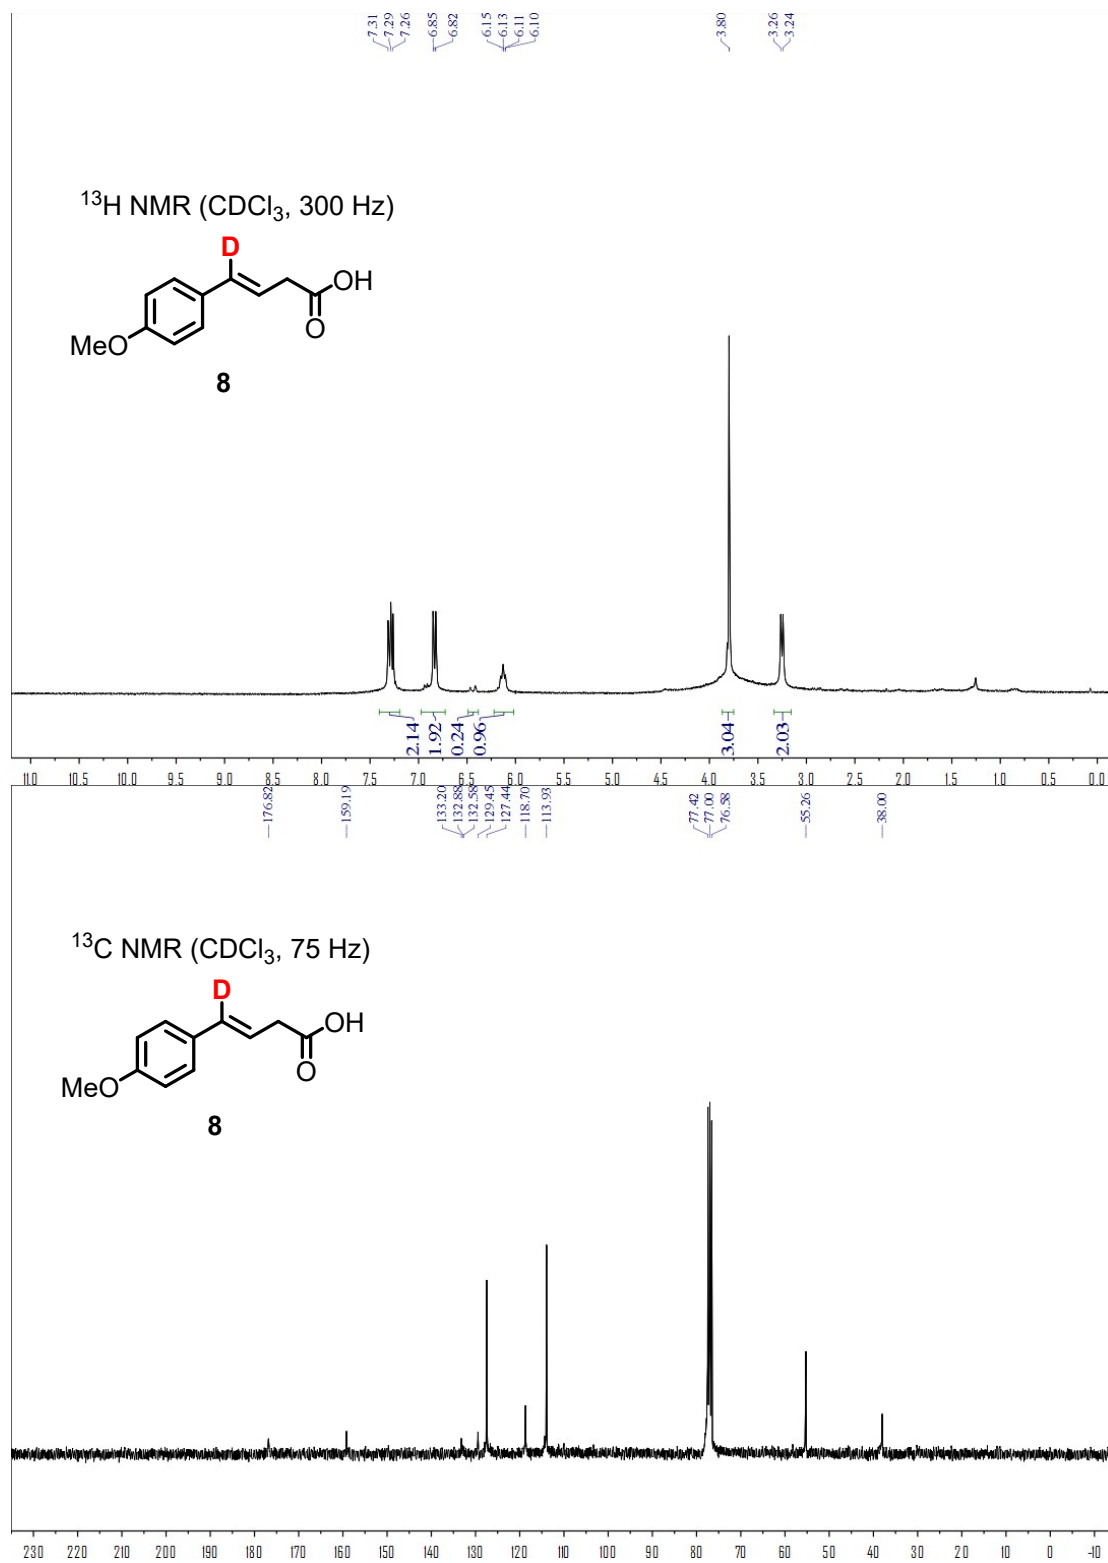

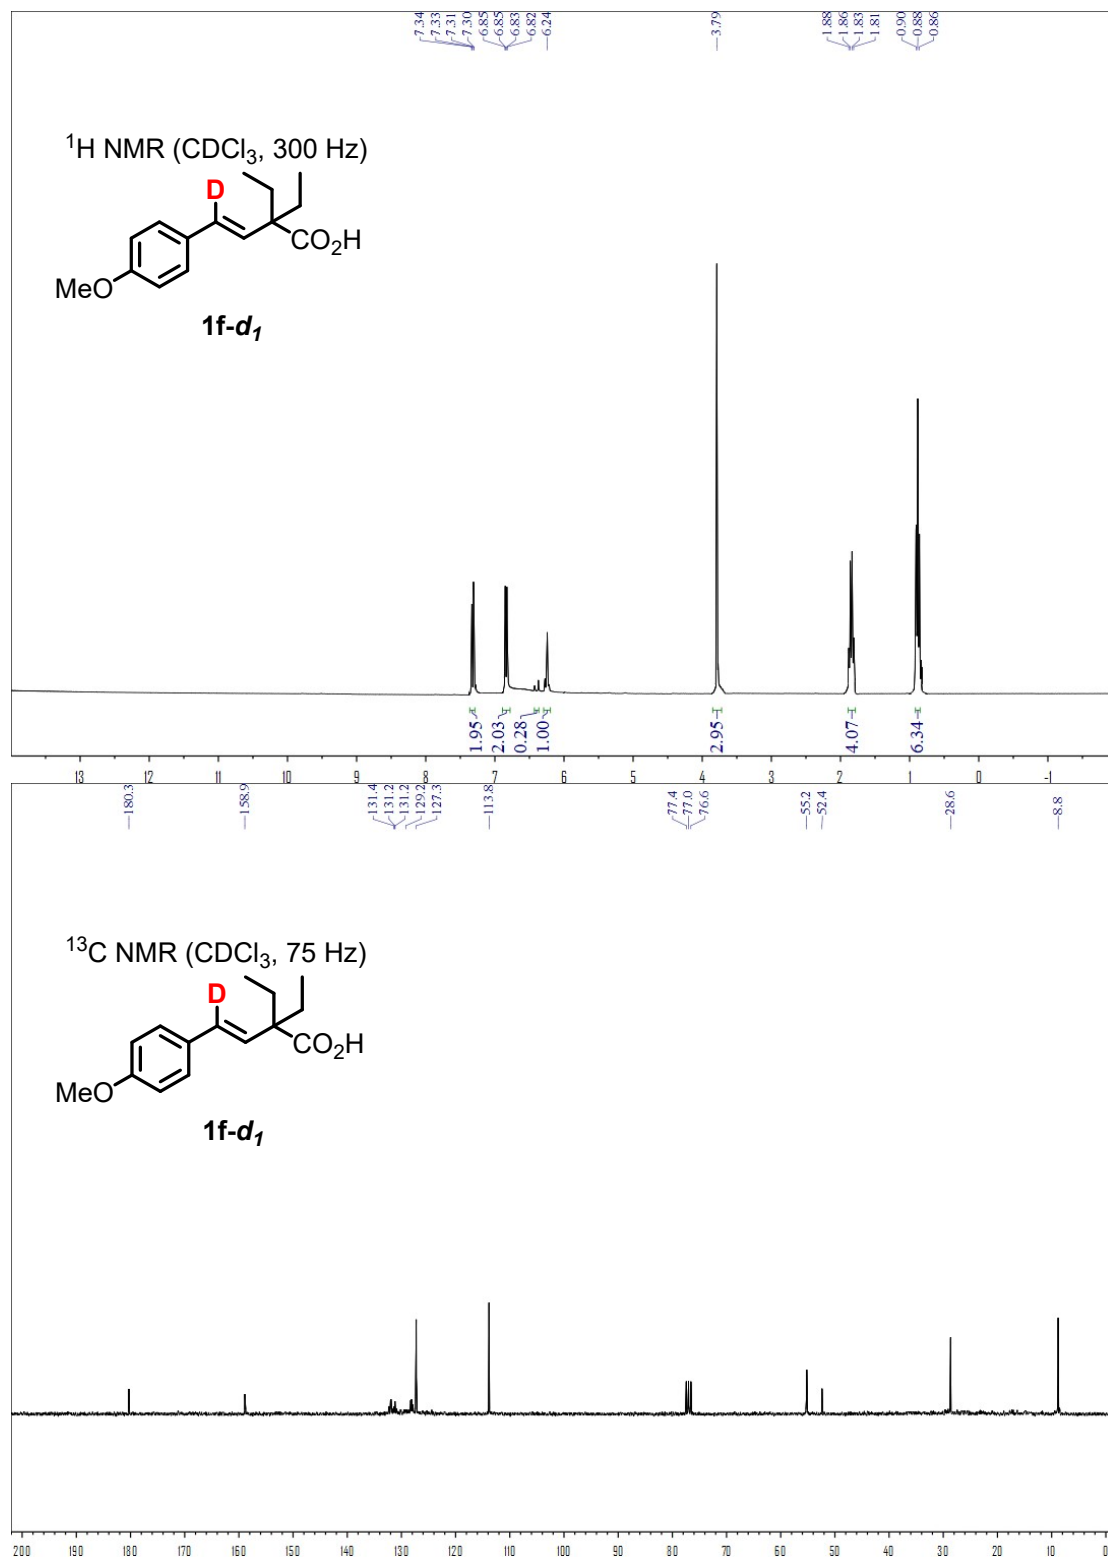



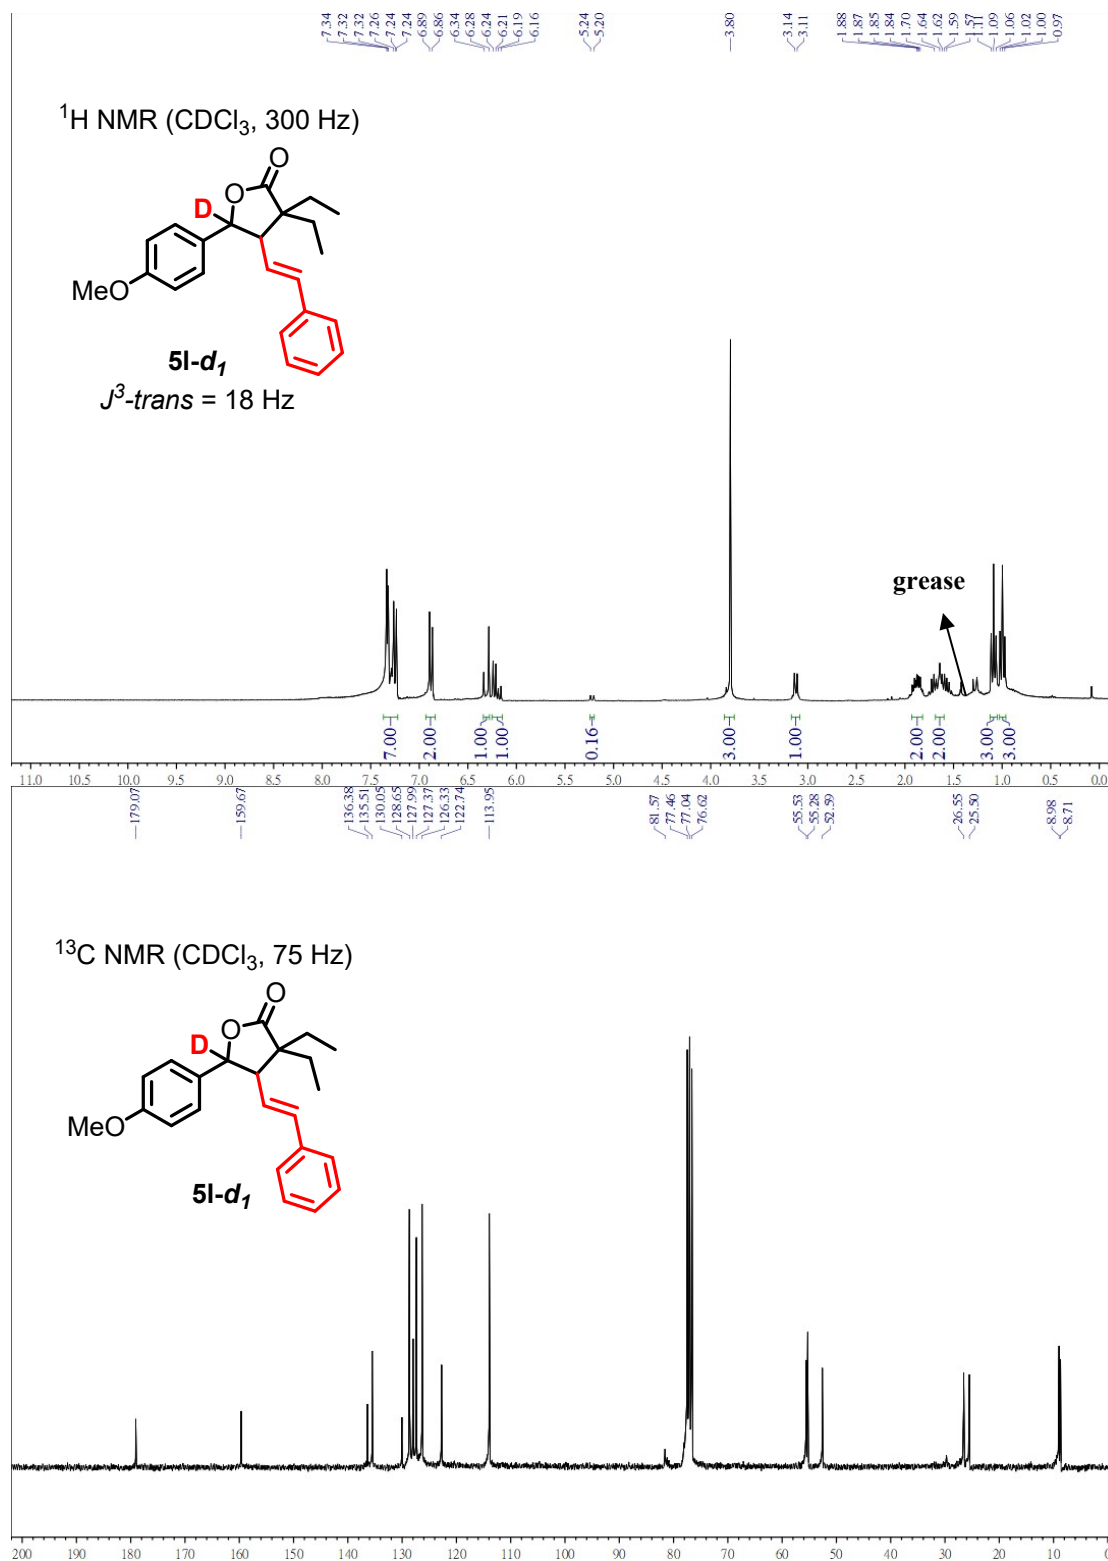

## 6. X-ray Data:

## X-ray structure of **3g**

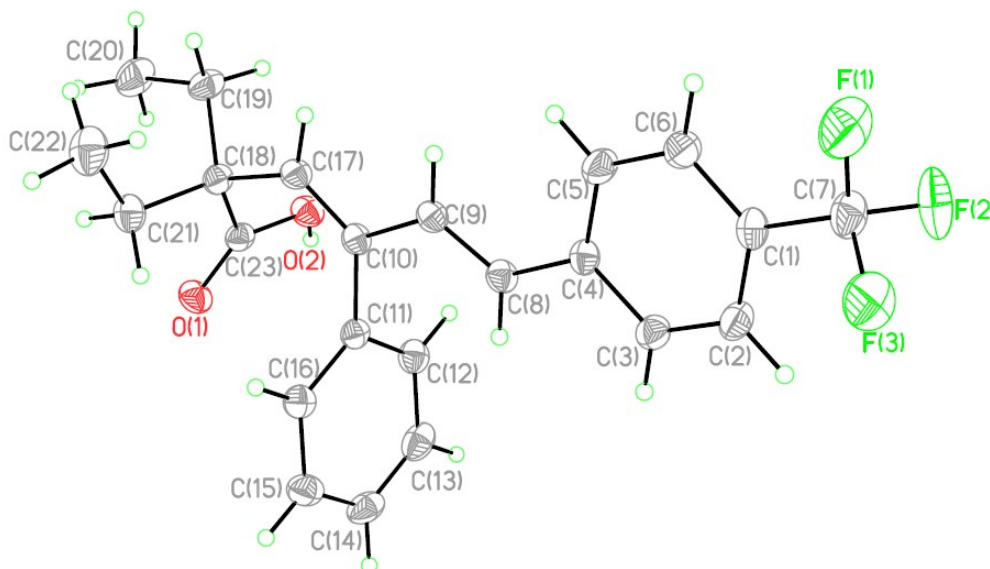

Table 1. Molecular structure and labeling scheme of **3g** with thermal ellipsoids at 50% probability level.

|                                 |                                                               |                  |
|---------------------------------|---------------------------------------------------------------|------------------|
| CCDC No                         | 2096072                                                       |                  |
| Empirical formula               | C <sub>23</sub> H <sub>23</sub> F <sub>3</sub> O <sub>2</sub> |                  |
| Formula weight                  | 388.41                                                        |                  |
| Temperature                     | 140(2) K                                                      |                  |
| Wavelength                      | 0.71073 Å                                                     |                  |
| Crystal system                  | Monoclinic                                                    |                  |
| Space group                     | P2 <sub>1</sub> /c                                            |                  |
| Unit cell dimensions            | a = 11.4578(9) Å                                              | α = 90°.         |
|                                 | b = 22.1975(18) Å                                             | β = 109.640(2)°. |
|                                 | c = 8.4627(7) Å                                               | γ = 90°.         |
| Volume                          | 2027.1(3) Å <sup>3</sup>                                      |                  |
| Z                               | 4                                                             |                  |
| Density (calculated)            | 1.273 Mg/m <sup>3</sup>                                       |                  |
| Absorption coefficient          | 0.098 mm <sup>-1</sup>                                        |                  |
| F(000)                          | 816                                                           |                  |
| Crystal size                    | 0.699 x 0.208 x 0.104 mm <sup>3</sup>                         |                  |
| Theta range for data collection | 2.098 to 28.386°.                                             |                  |
| Index ranges                    | -15 ≤ h ≤ 13, -29 ≤ k ≤ 29, -11 ≤ l ≤ 11                      |                  |
| Reflections collected           | 31882                                                         |                  |
| Independent reflections         | 5072 [R(int) = 0.0417]                                        |                  |

|                                   |                                             |
|-----------------------------------|---------------------------------------------|
| Completeness to theta = 25.242°   | 99.8 %                                      |
| Absorption correction             | Numerical                                   |
| Max. and min. transmission        | 0.7457 and 0.6494                           |
| Refinement method                 | Full-matrix least-squares on F <sup>2</sup> |
| Data / restraints / parameters    | 5072 / 0 / 255                              |
| Goodness-of-fit on F <sup>2</sup> | 1.054                                       |
| Final R indices [I>2sigma(I)]     | R1 = 0.0456, wR2 = 0.1052                   |
| R indices (all data)              | R1 = 0.0523, wR2 = 0.1089                   |
| Extinction coefficient            | n/a                                         |
| Largest diff. peak and hole       | 0.357 and -0.299 e.Å <sup>-3</sup>          |

Table 2. Atomic coordinates ( $\times 10^4$ ) and equivalent isotropic displacement parameters ( $\text{\AA}^2 \times 10^3$ ) for 21JUL08.  $U(\text{eq})$  is defined as one third of the trace of the orthogonalized  $U^{ij}$  tensor.

|       | x        | y       | z        | $U(\text{eq})$ |
|-------|----------|---------|----------|----------------|
| F(1)  | 5423(1)  | 5042(1) | -1592(2) | 56(1)          |
| F(2)  | 3778(1)  | 4511(1) | -2277(2) | 51(1)          |
| F(3)  | 4838(1)  | 4554(1) | -3903(1) | 48(1)          |
| O(1)  | 11145(1) | 363(1)  | 4582(1)  | 28(1)          |
| O(2)  | 9719(1)  | 760(1)  | 5533(1)  | 26(1)          |
| C(1)  | 5672(1)  | 3986(1) | -1438(2) | 24(1)          |
| C(2)  | 5463(1)  | 3435(1) | -2258(2) | 27(1)          |
| C(3)  | 6159(1)  | 2940(1) | -1510(2) | 24(1)          |
| C(4)  | 7077(1)  | 2983(1) | 69(2)    | 21(1)          |
| C(5)  | 7251(1)  | 3539(1) | 884(2)   | 29(1)          |
| C(6)  | 6560(1)  | 4038(1) | 143(2)   | 29(1)          |
| C(7)  | 4940(1)  | 4522(1) | -2284(2) | 30(1)          |
| C(8)  | 7835(1)  | 2452(1) | 764(2)   | 21(1)          |
| C(9)  | 8768(1)  | 2421(1) | 2225(2)  | 21(1)          |
| C(10) | 9520(1)  | 1884(1) | 2864(2)  | 20(1)          |
| C(11) | 9230(1)  | 1347(1) | 1739(2)  | 20(1)          |
| C(12) | 8199(1)  | 993(1)  | 1605(2)  | 25(1)          |
| C(13) | 7854(1)  | 530(1)  | 440(2)   | 30(1)          |
| C(14) | 8542(1)  | 413(1)  | -591(2)  | 31(1)          |
| C(15) | 9572(1)  | 758(1)  | -464(2)  | 29(1)          |
| C(16) | 9912(1)  | 1227(1) | 692(2)   | 23(1)          |
| C(17) | 10403(1) | 1905(1) | 4381(2)  | 22(1)          |
| C(18) | 11298(1) | 1422(1) | 5339(2)  | 21(1)          |
| C(19) | 11609(1) | 1571(1) | 7230(2)  | 27(1)          |
| C(20) | 12511(2) | 1139(1) | 8432(2)  | 38(1)          |
| C(21) | 12474(1) | 1409(1) | 4837(2)  | 28(1)          |
| C(22) | 13230(2) | 1989(1) | 5224(2)  | 39(1)          |
| C(23) | 10705(1) | 795(1)  | 5080(2)  | 21(1)          |

Table 3. Bond lengths [Å] and angles [°] for 21JUL08.

---

|             |            |
|-------------|------------|
| F(1)-C(7)   | 1.3280(17) |
| F(2)-C(7)   | 1.3335(17) |
| F(3)-C(7)   | 1.3374(18) |
| O(1)-C(23)  | 1.2226(15) |
| O(2)-C(23)  | 1.3122(16) |
| O(2)-H(2A)  | 0.8375     |
| C(1)-C(2)   | 1.3862(19) |
| C(1)-C(6)   | 1.3866(18) |
| C(1)-C(7)   | 1.4929(18) |
| C(2)-C(3)   | 1.3814(18) |
| C(2)-H(2)   | 0.9500     |
| C(3)-C(4)   | 1.3988(17) |
| C(3)-H(3)   | 0.9500     |
| C(4)-C(5)   | 1.3945(18) |
| C(4)-C(8)   | 1.4644(16) |
| C(5)-C(6)   | 1.3828(18) |
| C(5)-H(5)   | 0.9500     |
| C(6)-H(6)   | 0.9500     |
| C(8)-C(9)   | 1.3373(17) |
| C(8)-H(8)   | 0.9500     |
| C(9)-C(10)  | 1.4646(16) |
| C(9)-H(9)   | 0.9500     |
| C(10)-C(17) | 1.3422(17) |
| C(10)-C(11) | 1.4910(17) |
| C(11)-C(16) | 1.3908(17) |
| C(11)-C(12) | 1.3908(18) |
| C(12)-C(13) | 1.3877(19) |
| C(12)-H(12) | 0.9500     |
| C(13)-C(14) | 1.382(2)   |
| C(13)-H(13) | 0.9500     |
| C(14)-C(15) | 1.381(2)   |
| C(14)-H(14) | 0.9500     |
| C(15)-C(16) | 1.3905(18) |
| C(15)-H(15) | 0.9500     |

|                  |            |
|------------------|------------|
| C(16)-H(16)      | 0.9500     |
| C(17)-C(18)      | 1.5175(16) |
| C(17)-H(17)      | 0.9500     |
| C(18)-C(23)      | 1.5309(17) |
| C(18)-C(21)      | 1.5432(19) |
| C(18)-C(19)      | 1.5540(18) |
| C(19)-C(20)      | 1.5209(19) |
| C(19)-H(19A)     | 0.9900     |
| C(19)-H(19B)     | 0.9900     |
| C(20)-H(20A)     | 0.9800     |
| C(20)-H(20B)     | 0.9800     |
| C(20)-H(20C)     | 0.9800     |
| C(21)-C(22)      | 1.524(2)   |
| C(21)-H(21A)     | 0.9900     |
| C(21)-H(21B)     | 0.9900     |
| C(22)-H(22A)     | 0.9800     |
| C(22)-H(22B)     | 0.9800     |
| C(22)-H(22C)     | 0.9800     |
| C(23)-O(2)-H(2A) | 109.4      |
| C(2)-C(1)-C(6)   | 120.26(12) |
| C(2)-C(1)-C(7)   | 119.20(12) |
| C(6)-C(1)-C(7)   | 120.54(12) |
| C(3)-C(2)-C(1)   | 119.76(12) |
| C(3)-C(2)-H(2)   | 120.1      |
| C(1)-C(2)-H(2)   | 120.1      |
| C(2)-C(3)-C(4)   | 121.07(12) |
| C(2)-C(3)-H(3)   | 119.5      |
| C(4)-C(3)-H(3)   | 119.5      |
| C(5)-C(4)-C(3)   | 118.03(11) |
| C(5)-C(4)-C(8)   | 123.12(11) |
| C(3)-C(4)-C(8)   | 118.82(11) |
| C(6)-C(5)-C(4)   | 121.29(12) |
| C(6)-C(5)-H(5)   | 119.4      |
| C(4)-C(5)-H(5)   | 119.4      |
| C(5)-C(6)-C(1)   | 119.56(12) |

|                   |            |
|-------------------|------------|
| C(5)-C(6)-H(6)    | 120.2      |
| C(1)-C(6)-H(6)    | 120.2      |
| F(1)-C(7)-F(2)    | 106.37(13) |
| F(1)-C(7)-F(3)    | 106.65(12) |
| F(2)-C(7)-F(3)    | 105.15(12) |
| F(1)-C(7)-C(1)    | 113.46(12) |
| F(2)-C(7)-C(1)    | 112.60(12) |
| F(3)-C(7)-C(1)    | 112.02(12) |
| C(9)-C(8)-C(4)    | 126.48(12) |
| C(9)-C(8)-H(8)    | 116.8      |
| C(4)-C(8)-H(8)    | 116.8      |
| C(8)-C(9)-C(10)   | 124.85(11) |
| C(8)-C(9)-H(9)    | 117.6      |
| C(10)-C(9)-H(9)   | 117.6      |
| C(17)-C(10)-C(9)  | 118.99(11) |
| C(17)-C(10)-C(11) | 125.03(11) |
| C(9)-C(10)-C(11)  | 115.97(10) |
| C(16)-C(11)-C(12) | 118.93(12) |
| C(16)-C(11)-C(10) | 120.52(11) |
| C(12)-C(11)-C(10) | 120.27(11) |
| C(13)-C(12)-C(11) | 120.50(13) |
| C(13)-C(12)-H(12) | 119.8      |
| C(11)-C(12)-H(12) | 119.8      |
| C(14)-C(13)-C(12) | 120.07(13) |
| C(14)-C(13)-H(13) | 120.0      |
| C(12)-C(13)-H(13) | 120.0      |
| C(15)-C(14)-C(13) | 120.02(13) |
| C(15)-C(14)-H(14) | 120.0      |
| C(13)-C(14)-H(14) | 120.0      |
| C(14)-C(15)-C(16) | 120.02(13) |
| C(14)-C(15)-H(15) | 120.0      |
| C(16)-C(15)-H(15) | 120.0      |
| C(15)-C(16)-C(11) | 120.45(12) |
| C(15)-C(16)-H(16) | 119.8      |
| C(11)-C(16)-H(16) | 119.8      |
| C(10)-C(17)-C(18) | 129.99(11) |

|                     |            |
|---------------------|------------|
| C(10)-C(17)-H(17)   | 115.0      |
| C(18)-C(17)-H(17)   | 115.0      |
| C(17)-C(18)-C(23)   | 112.23(10) |
| C(17)-C(18)-C(21)   | 111.22(10) |
| C(23)-C(18)-C(21)   | 109.30(10) |
| C(17)-C(18)-C(19)   | 106.21(10) |
| C(23)-C(18)-C(19)   | 106.14(10) |
| C(21)-C(18)-C(19)   | 111.62(11) |
| C(20)-C(19)-C(18)   | 115.08(12) |
| C(20)-C(19)-H(19A)  | 108.5      |
| C(18)-C(19)-H(19A)  | 108.5      |
| C(20)-C(19)-H(19B)  | 108.5      |
| C(18)-C(19)-H(19B)  | 108.5      |
| H(19A)-C(19)-H(19B) | 107.5      |
| C(19)-C(20)-H(20A)  | 109.5      |
| C(19)-C(20)-H(20B)  | 109.5      |
| H(20A)-C(20)-H(20B) | 109.5      |
| C(19)-C(20)-H(20C)  | 109.5      |
| H(20A)-C(20)-H(20C) | 109.5      |
| H(20B)-C(20)-H(20C) | 109.5      |
| C(22)-C(21)-C(18)   | 114.28(12) |
| C(22)-C(21)-H(21A)  | 108.7      |
| C(18)-C(21)-H(21A)  | 108.7      |
| C(22)-C(21)-H(21B)  | 108.7      |
| C(18)-C(21)-H(21B)  | 108.7      |
| H(21A)-C(21)-H(21B) | 107.6      |
| C(21)-C(22)-H(22A)  | 109.5      |
| C(21)-C(22)-H(22B)  | 109.5      |
| H(22A)-C(22)-H(22B) | 109.5      |
| C(21)-C(22)-H(22C)  | 109.5      |
| H(22A)-C(22)-H(22C) | 109.5      |
| H(22B)-C(22)-H(22C) | 109.5      |
| O(1)-C(23)-O(2)     | 123.32(12) |
| O(1)-C(23)-C(18)    | 123.25(12) |
| O(2)-C(23)-C(18)    | 113.32(10) |



Symmetry transformations used to generate equivalent atoms:

Table 4. Anisotropic displacement parameters ( $\text{\AA}^2 \times 10^3$ ) for 21JUL08. The anisotropic displacement factor exponent takes the form:  $-2\pi^2 [ h^2 a^{*2} U^{11} + \dots + 2 h k a^* b^* U^{12} ]$

|       | $U^{11}$ | $U^{22}$ | $U^{33}$ | $U^{23}$ | $U^{13}$ | $U^{12}$ |
|-------|----------|----------|----------|----------|----------|----------|
| F(1)  | 60(1)    | 22(1)    | 63(1)    | 6(1)     | -11(1)   | 6(1)     |
| F(2)  | 32(1)    | 52(1)    | 71(1)    | 27(1)    | 19(1)    | 21(1)    |
| F(3)  | 60(1)    | 46(1)    | 36(1)    | 20(1)    | 14(1)    | 16(1)    |
| O(1)  | 30(1)    | 20(1)    | 35(1)    | -2(1)    | 12(1)    | 3(1)     |
| O(2)  | 29(1)    | 20(1)    | 31(1)    | -2(1)    | 13(1)    | -2(1)    |
| C(1)  | 21(1)    | 23(1)    | 27(1)    | 6(1)     | 6(1)     | 4(1)     |
| C(2)  | 22(1)    | 29(1)    | 23(1)    | 2(1)     | 1(1)     | 1(1)     |
| C(3)  | 23(1)    | 22(1)    | 25(1)    | -2(1)    | 5(1)     | -1(1)    |
| C(4)  | 19(1)    | 20(1)    | 23(1)    | 2(1)     | 6(1)     | 2(1)     |
| C(5)  | 29(1)    | 24(1)    | 25(1)    | -2(1)    | -2(1)    | 5(1)     |
| C(6)  | 30(1)    | 21(1)    | 29(1)    | -2(1)    | 1(1)     | 4(1)     |
| C(7)  | 28(1)    | 26(1)    | 32(1)    | 7(1)     | 4(1)     | 5(1)     |
| C(8)  | 22(1)    | 18(1)    | 24(1)    | 1(1)     | 8(1)     | 2(1)     |
| C(9)  | 22(1)    | 17(1)    | 23(1)    | 0(1)     | 8(1)     | 1(1)     |
| C(10) | 20(1)    | 17(1)    | 22(1)    | 2(1)     | 8(1)     | 1(1)     |
| C(11) | 21(1)    | 16(1)    | 18(1)    | 3(1)     | 3(1)     | 3(1)     |
| C(12) | 23(1)    | 23(1)    | 28(1)    | 2(1)     | 8(1)     | 1(1)     |
| C(13) | 26(1)    | 22(1)    | 34(1)    | 1(1)     | 0(1)     | -2(1)    |
| C(14) | 36(1)    | 20(1)    | 26(1)    | -3(1)    | -2(1)    | 4(1)     |
| C(15) | 36(1)    | 27(1)    | 22(1)    | 1(1)     | 7(1)     | 8(1)     |
| C(16) | 25(1)    | 21(1)    | 22(1)    | 3(1)     | 7(1)     | 2(1)     |
| C(17) | 24(1)    | 17(1)    | 23(1)    | -1(1)    | 6(1)     | 2(1)     |
| C(18) | 22(1)    | 18(1)    | 21(1)    | 1(1)     | 4(1)     | 2(1)     |
| C(19) | 32(1)    | 24(1)    | 21(1)    | 0(1)     | 2(1)     | 0(1)     |
| C(20) | 38(1)    | 41(1)    | 25(1)    | 6(1)     | -1(1)    | 3(1)     |
| C(21) | 24(1)    | 27(1)    | 31(1)    | 4(1)     | 8(1)     | 3(1)     |
| C(22) | 32(1)    | 33(1)    | 52(1)    | 6(1)     | 15(1)    | -4(1)    |
| C(23) | 23(1)    | 20(1)    | 17(1)    | 1(1)     | 2(1)     | 3(1)     |

Table 5. Hydrogen coordinates ( $\times 10^4$ ) and isotropic displacement parameters ( $\text{\AA}^2 \times 10^{-3}$ ) for 21JUL08.

|        | x     | y    | z     | U(eq) |
|--------|-------|------|-------|-------|
| H(2A)  | 9491  | 401  | 5493  | 39    |
| H(2)   | 4842  | 3399 | -3331 | 32    |
| H(3)   | 6013  | 2563 | -2077 | 29    |
| H(5)   | 7856  | 3575 | 1969  | 34    |
| H(6)   | 6692  | 4413 | 713   | 35    |
| H(8)   | 7643  | 2094 | 113   | 26    |
| H(9)   | 8959  | 2774 | 2898  | 25    |
| H(12)  | 7727  | 1070 | 2316  | 30    |
| H(13)  | 7146  | 292  | 351   | 36    |
| H(14)  | 8306  | 95   | -1387 | 37    |
| H(15)  | 10048 | 676  | -1166 | 34    |
| H(16)  | 10616 | 1466 | 767   | 28    |
| H(17)  | 10479 | 2281 | 4942  | 26    |
| H(19A) | 11961 | 1982 | 7437  | 33    |
| H(19B) | 10828 | 1573 | 7488  | 33    |
| H(20A) | 12611 | 1252 | 9590  | 56    |
| H(20B) | 13315 | 1160 | 8264  | 56    |
| H(20C) | 12187 | 728  | 8217  | 56    |
| H(21A) | 13007 | 1072 | 5431  | 33    |
| H(21B) | 12228 | 1328 | 3618  | 33    |
| H(22A) | 12698 | 2330 | 4705  | 58    |
| H(22B) | 13914 | 1961 | 4776  | 58    |
| H(22C) | 13566 | 2048 | 6442  | 58    |

## X-ray structure of 5a

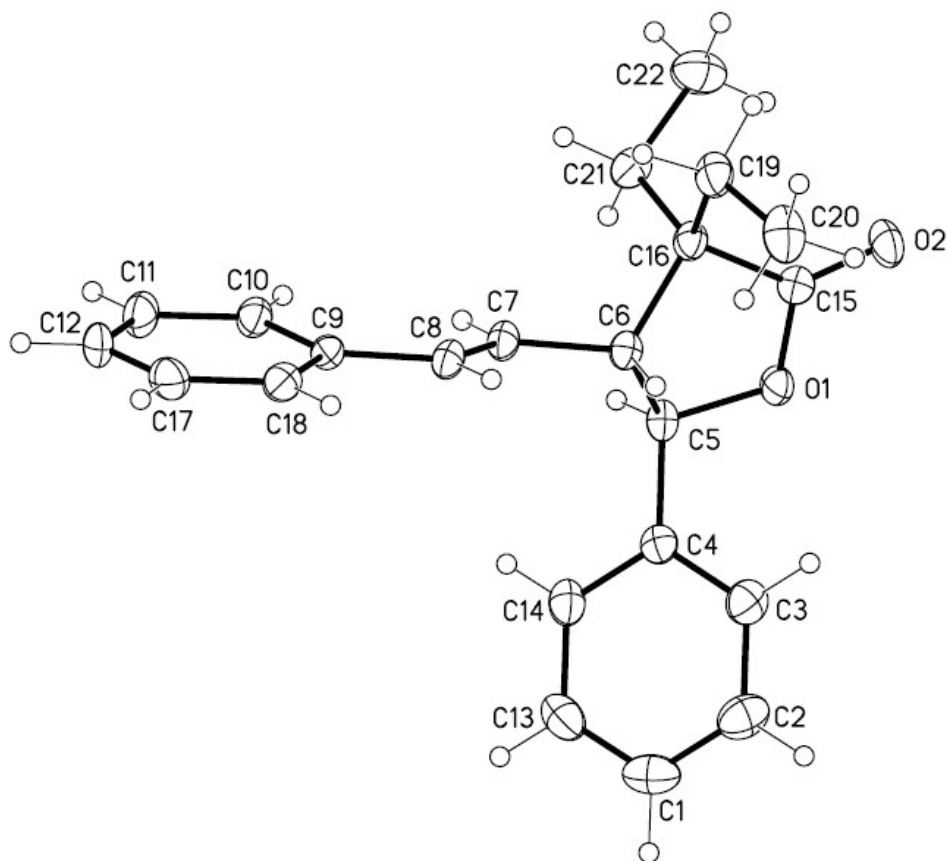

**Table 1.** Molecular structure and labeling scheme of **5a** with thermal ellipsoids at 50% probability level.

|                        |                                                                                                                                                         |
|------------------------|---------------------------------------------------------------------------------------------------------------------------------------------------------|
| CCDC No                | 1988572                                                                                                                                                 |
| Empirical formula      | C <sub>22</sub> H <sub>24</sub> O <sub>2</sub>                                                                                                          |
| Formula weight         | 320.41                                                                                                                                                  |
| Temperature            | 100(2) K                                                                                                                                                |
| Wavelength             | 0.71073 Å                                                                                                                                               |
| Crystal system         | Monoclinic                                                                                                                                              |
| Space group            | P 21                                                                                                                                                    |
| Unit cell dimensions   | a = 7.8570(6) Å                      α = 90°.<br>b = 10.6978(9) Å                     β = 105.428(5)°.<br>c = 11.0526(10) Å                    γ = 90°. |
| Volume                 | 895.52(13) Å <sup>3</sup>                                                                                                                               |
| Z                      | 2                                                                                                                                                       |
| Density (calculated)   | 1.188 Mg/m <sup>3</sup>                                                                                                                                 |
| Absorption coefficient | 0.074 mm <sup>-1</sup>                                                                                                                                  |
| F(000)                 | 344                                                                                                                                                     |

|                                   |                                             |
|-----------------------------------|---------------------------------------------|
| Crystal size                      | 0.12 x 0.03 x 0.02 mm <sup>3</sup>          |
| Theta range for data collection   | 1.911 to 26.417°.                           |
| Index ranges                      | -9<=h<=9, -12<=k<=12, -13<=l<=13            |
| Reflections collected             | 8878                                        |
| Independent reflections           | 3288 [R(int) = 0.0240]                      |
| Completeness to theta = 25.242°   | 97.8 %                                      |
| Absorption correction             | Semi-empirical from equivalents             |
| Max. and min. transmission        | 0.9485 and 0.8079                           |
| Refinement method                 | Full-matrix least-squares on F <sup>2</sup> |
| Data / restraints / parameters    | 3288 / 1 / 220                              |
| Goodness-of-fit on F <sup>2</sup> | 1.038                                       |
| Final R indices [I>2sigma(I)]     | R1 = 0.0354, wR2 = 0.0827                   |
| R indices (all data)              | R1 = 0.0401, wR2 = 0.0854                   |
| Absolute structure parameter      | -0.7(15)                                    |
| Extinction coefficient            | n/a                                         |
| Largest diff. peak and hole       | 0.210 and -0.148 e.Å <sup>-3</sup>          |

**Table 2.** Atomic coordinates ( $\times 10^4$ ) and equivalent isotropic displacement parameters ( $\text{\AA}^2 \times 10^3$ ) for **5a**.  $U(\text{eq})$  is defined as one third of the trace of the orthogonalized  $U^{ij}$  tensor.

|       | x        | y        | z        | $U(\text{eq})$ |
|-------|----------|----------|----------|----------------|
| O(1)  | 5243(2)  | 7260(2)  | 767(1)   | 22(1)          |
| O(2)  | 6726(2)  | 6241(2)  | -388(2)  | 28(1)          |
| C(1)  | 3693(3)  | 7941(3)  | 4794(2)  | 34(1)          |
| C(2)  | 4553(3)  | 6983(3)  | 4364(2)  | 34(1)          |
| C(3)  | 5132(3)  | 7143(3)  | 3294(2)  | 28(1)          |
| C(4)  | 4819(3)  | 8267(2)  | 2629(2)  | 20(1)          |
| C(5)  | 5360(3)  | 8452(2)  | 1434(2)  | 20(1)          |
| C(6)  | 7280(3)  | 8880(2)  | 1581(2)  | 19(1)          |
| C(7)  | 7548(3)  | 10249(2) | 1814(2)  | 21(1)          |
| C(8)  | 8824(3)  | 10738(2) | 2726(2)  | 20(1)          |
| C(9)  | 9158(3)  | 12077(2) | 3017(2)  | 20(1)          |
| C(10) | 8180(3)  | 13029(2) | 2281(2)  | 23(1)          |
| C(11) | 8521(3)  | 14277(2) | 2610(2)  | 28(1)          |
| C(12) | 9849(3)  | 14602(3) | 3664(3)  | 31(1)          |
| C(13) | 3400(3)  | 9064(3)  | 4149(2)  | 32(1)          |
| C(14) | 3949(3)  | 9227(3)  | 3064(2)  | 27(1)          |
| C(15) | 6563(3)  | 7170(2)  | 182(2)   | 20(1)          |
| C(16) | 7645(3)  | 8367(2)  | 361(2)   | 21(1)          |
| C(17) | 10842(3) | 13672(3) | 4394(2)  | 30(1)          |
| C(18) | 10497(3) | 12426(2) | 4071(2)  | 24(1)          |
| C(19) | 9596(3)  | 8111(2)  | 464(2)   | 28(1)          |
| C(20) | 10485(3) | 7149(3)  | 1447(3)  | 33(1)          |
| C(21) | 6831(3)  | 9236(3)  | -767(2)  | 28(1)          |
| C(22) | 6706(4)  | 8693(3)  | -2055(2) | 38(1)          |

**Table 3.** Bond lengths [Å] and angles [°] for **5a**.

---

|             |          |
|-------------|----------|
| O(1)-C(15)  | 1.364(3) |
| O(1)-C(5)   | 1.464(3) |
| O(2)-C(15)  | 1.202(3) |
| C(1)-C(2)   | 1.380(4) |
| C(1)-C(13)  | 1.384(4) |
| C(1)-H(1)   | 0.9500   |
| C(2)-C(3)   | 1.387(4) |
| C(2)-H(3)   | 0.9500   |
| C(3)-C(4)   | 1.396(3) |
| C(3)-H(4)   | 0.9500   |
| C(4)-C(14)  | 1.389(3) |
| C(4)-C(5)   | 1.504(3) |
| C(5)-C(6)   | 1.543(3) |
| C(5)-H(22)  | 1.0000   |
| C(6)-C(7)   | 1.493(3) |
| C(6)-C(16)  | 1.551(3) |
| C(6)-H(5)   | 1.0000   |
| C(7)-C(8)   | 1.325(3) |
| C(7)-H(11)  | 0.9500   |
| C(8)-C(9)   | 1.477(3) |
| C(8)-H(10)  | 0.9500   |
| C(9)-C(18)  | 1.397(3) |
| C(9)-C(10)  | 1.399(3) |
| C(10)-C(11) | 1.391(4) |
| C(10)-H(6)  | 0.9500   |
| C(11)-C(12) | 1.385(4) |
| C(11)-H(9)  | 0.9500   |
| C(12)-C(17) | 1.384(4) |
| C(12)-H(2)  | 0.9500   |
| C(13)-C(14) | 1.389(4) |
| C(13)-H(24) | 0.9500   |
| C(14)-H(23) | 0.9500   |
| C(15)-C(16) | 1.520(3) |
| C(16)-C(19) | 1.532(3) |

|                 |            |
|-----------------|------------|
| C(16)-C(21)     | 1.550(3)   |
| C(17)-C(18)     | 1.387(4)   |
| C(17)-H(8)      | 0.9500     |
| C(18)-H(7)      | 0.9500     |
| C(19)-C(20)     | 1.525(4)   |
| C(19)-H(16)     | 0.9900     |
| C(19)-H(12)     | 0.9900     |
| C(20)-H(15)     | 0.9800     |
| C(20)-H(13)     | 0.9800     |
| C(20)-H(14)     | 0.9800     |
| C(21)-C(22)     | 1.516(4)   |
| C(21)-H(17)     | 0.9900     |
| C(21)-H(18)     | 0.9900     |
| C(22)-H(20)     | 0.9800     |
| C(22)-H(21)     | 0.9800     |
| C(22)-H(19)     | 0.9800     |
|                 |            |
| C(15)-O(1)-C(5) | 110.26(16) |
| C(2)-C(1)-C(13) | 119.8(2)   |
| C(2)-C(1)-H(1)  | 120.1      |
| C(13)-C(1)-H(1) | 120.1      |
| C(1)-C(2)-C(3)  | 120.2(3)   |
| C(1)-C(2)-H(3)  | 119.9      |
| C(3)-C(2)-H(3)  | 119.9      |
| C(2)-C(3)-C(4)  | 120.3(2)   |
| C(2)-C(3)-H(4)  | 119.9      |
| C(4)-C(3)-H(4)  | 119.9      |
| C(14)-C(4)-C(3) | 119.2(2)   |
| C(14)-C(4)-C(5) | 119.1(2)   |
| C(3)-C(4)-C(5)  | 121.6(2)   |
| O(1)-C(5)-C(4)  | 109.41(18) |
| O(1)-C(5)-C(6)  | 103.89(17) |
| C(4)-C(5)-C(6)  | 116.31(17) |
| O(1)-C(5)-H(22) | 109.0      |
| C(4)-C(5)-H(22) | 109.0      |
| C(6)-C(5)-H(22) | 109.0      |



|                   |            |
|-------------------|------------|
| C(7)-C(6)-C(5)    | 113.47(18) |
| C(7)-C(6)-C(16)   | 116.58(19) |
| C(5)-C(6)-C(16)   | 101.84(17) |
| C(7)-C(6)-H(5)    | 108.2      |
| C(5)-C(6)-H(5)    | 108.2      |
| C(16)-C(6)-H(5)   | 108.2      |
| C(8)-C(7)-C(6)    | 124.2(2)   |
| C(8)-C(7)-H(11)   | 117.9      |
| C(6)-C(7)-H(11)   | 117.9      |
| C(7)-C(8)-C(9)    | 127.1(2)   |
| C(7)-C(8)-H(10)   | 116.5      |
| C(9)-C(8)-H(10)   | 116.5      |
| C(18)-C(9)-C(10)  | 117.8(2)   |
| C(18)-C(9)-C(8)   | 119.4(2)   |
| C(10)-C(9)-C(8)   | 122.8(2)   |
| C(11)-C(10)-C(9)  | 120.6(2)   |
| C(11)-C(10)-H(6)  | 119.7      |
| C(9)-C(10)-H(6)   | 119.7      |
| C(12)-C(11)-C(10) | 120.6(2)   |
| C(12)-C(11)-H(9)  | 119.7      |
| C(10)-C(11)-H(9)  | 119.7      |
| C(17)-C(12)-C(11) | 119.5(2)   |
| C(17)-C(12)-H(2)  | 120.3      |
| C(11)-C(12)-H(2)  | 120.3      |
| C(1)-C(13)-C(14)  | 120.4(2)   |
| C(1)-C(13)-H(24)  | 119.8      |
| C(14)-C(13)-H(24) | 119.8      |
| C(4)-C(14)-C(13)  | 120.0(2)   |
| C(4)-C(14)-H(23)  | 120.0      |
| C(13)-C(14)-H(23) | 120.0      |
| O(2)-C(15)-O(1)   | 120.5(2)   |
| O(2)-C(15)-C(16)  | 129.1(2)   |
| O(1)-C(15)-C(16)  | 110.36(19) |
| C(15)-C(16)-C(19) | 111.9(2)   |
| C(15)-C(16)-C(21) | 107.66(17) |
| C(19)-C(16)-C(21) | 110.91(19) |

|                   |            |
|-------------------|------------|
| C(15)-C(16)-C(6)  | 100.68(17) |
| C(19)-C(16)-C(6)  | 114.32(17) |
| C(21)-C(16)-C(6)  | 110.8(2)   |
| C(12)-C(17)-C(18) | 119.9(2)   |
| C(12)-C(17)-H(8)  | 120.0      |
| C(18)-C(17)-H(8)  | 120.0      |
| C(17)-C(18)-C(9)  | 121.5(2)   |
| C(17)-C(18)-H(7)  | 119.2      |
| C(9)-C(18)-H(7)   | 119.2      |
| C(20)-C(19)-C(16) | 115.6(2)   |
| C(20)-C(19)-H(16) | 108.4      |
| C(16)-C(19)-H(16) | 108.4      |
| C(20)-C(19)-H(12) | 108.4      |
| C(16)-C(19)-H(12) | 108.4      |
| H(16)-C(19)-H(12) | 107.4      |
| C(19)-C(20)-H(15) | 109.5      |
| C(19)-C(20)-H(13) | 109.5      |
| H(15)-C(20)-H(13) | 109.5      |
| C(19)-C(20)-H(14) | 109.5      |
| H(15)-C(20)-H(14) | 109.5      |
| H(13)-C(20)-H(14) | 109.5      |
| C(22)-C(21)-C(16) | 115.8(2)   |
| C(22)-C(21)-H(17) | 108.3      |
| C(16)-C(21)-H(17) | 108.3      |
| C(22)-C(21)-H(18) | 108.3      |
| C(16)-C(21)-H(18) | 108.3      |
| H(17)-C(21)-H(18) | 107.4      |
| C(21)-C(22)-H(20) | 109.5      |
| C(21)-C(22)-H(21) | 109.5      |
| H(20)-C(22)-H(21) | 109.5      |
| C(21)-C(22)-H(19) | 109.5      |
| H(20)-C(22)-H(19) | 109.5      |
| H(21)-C(22)-H(19) | 109.5      |

---

Symmetry transformations used to generate equivalent atoms:



**Table 4.** Anisotropic displacement parameters ( $\text{\AA}^2 \times 10^3$ ) for **5a**. The anisotropic displacement factor exponent takes the form:  $-2\pi^2 [ h^2 a^{*2} U^{11} + \dots + 2 h k a^* b^* U^{12} ]$

|       | U <sup>11</sup> | U <sup>22</sup> | U <sup>33</sup> | U <sup>23</sup> | U <sup>13</sup> | U <sup>12</sup> |
|-------|-----------------|-----------------|-----------------|-----------------|-----------------|-----------------|
| O(1)  | 22(1)           | 18(1)           | 28(1)           | -5(1)           | 9(1)            | -6(1)           |
| O(2)  | 27(1)           | 22(1)           | 35(1)           | -11(1)          | 8(1)            | -5(1)           |
| C(1)  | 26(1)           | 52(2)           | 26(1)           | 0(1)            | 9(1)            | -5(1)           |
| C(2)  | 32(1)           | 37(2)           | 31(1)           | 12(1)           | 6(1)            | 4(1)            |
| C(3)  | 24(1)           | 26(2)           | 32(1)           | 4(1)            | 7(1)            | 5(1)            |
| C(4)  | 15(1)           | 21(1)           | 24(1)           | -2(1)           | 4(1)            | -2(1)           |
| C(5)  | 20(1)           | 16(1)           | 24(1)           | -2(1)           | 3(1)            | 0(1)            |
| C(6)  | 17(1)           | 16(1)           | 22(1)           | 0(1)            | 4(1)            | 0(1)            |
| C(7)  | 20(1)           | 15(1)           | 27(1)           | 1(1)            | 6(1)            | 1(1)            |
| C(8)  | 20(1)           | 15(1)           | 26(1)           | 2(1)            | 6(1)            | 1(1)            |
| C(9)  | 21(1)           | 18(1)           | 24(1)           | -2(1)           | 10(1)           | -3(1)           |
| C(10) | 23(1)           | 19(1)           | 28(1)           | 0(1)            | 8(1)            | -2(1)           |
| C(11) | 32(1)           | 18(1)           | 38(1)           | 3(1)            | 12(1)           | 4(1)            |
| C(12) | 42(1)           | 16(1)           | 38(2)           | -7(1)           | 18(1)           | -7(1)           |
| C(13) | 27(1)           | 34(2)           | 35(1)           | -11(1)          | 11(1)           | -1(1)           |
| C(14) | 26(1)           | 20(1)           | 34(1)           | -3(1)           | 7(1)            | -2(1)           |
| C(15) | 17(1)           | 21(1)           | 22(1)           | 0(1)            | 4(1)            | 0(1)            |
| C(16) | 20(1)           | 18(1)           | 24(1)           | -2(1)           | 6(1)            | -3(1)           |
| C(17) | 34(1)           | 28(2)           | 27(1)           | -9(1)           | 10(1)           | -9(1)           |
| C(18) | 26(1)           | 23(1)           | 24(1)           | 1(1)            | 7(1)            | -2(1)           |
| C(19) | 22(1)           | 23(1)           | 40(1)           | -5(1)           | 12(1)           | -5(1)           |
| C(20) | 18(1)           | 28(2)           | 50(2)           | -5(1)           | 4(1)            | 3(1)            |
| C(21) | 30(1)           | 24(2)           | 29(1)           | 4(1)            | 9(1)            | -2(1)           |
| C(22) | 41(2)           | 47(2)           | 28(1)           | 4(1)            | 11(1)           | 4(1)            |

**Table 5.** Hydrogen coordinates ( $\times 10^4$ ) and isotropic displacement parameters ( $\text{\AA}^2 \times 10^3$ ) for **5a**.

|       | x     | y     | z     | U(eq) |
|-------|-------|-------|-------|-------|
| H(1)  | 3304  | 7831  | 5530  | 41    |
| H(3)  | 4750  | 6210  | 4803  | 40    |
| H(4)  | 5744  | 6486  | 3012  | 33    |
| H(22) | 4539  | 9065  | 891   | 24    |
| H(5)  | 8059  | 8423  | 2309  | 23    |
| H(11) | 6753  | 10806 | 1275  | 25    |
| H(10) | 9609  | 10164 | 3250  | 24    |
| H(6)  | 7275  | 12822 | 1550  | 28    |
| H(9)  | 7836  | 14914 | 2108  | 34    |
| H(2)  | 10076 | 15456 | 3883  | 37    |
| H(24) | 2819  | 9727  | 4450  | 38    |
| H(23) | 3730  | 9996  | 2620  | 32    |
| H(8)  | 11758 | 13886 | 5117  | 35    |
| H(7)  | 11188 | 11796 | 4579  | 29    |
| H(16) | 9702  | 7825  | -365  | 33    |
| H(12) | 10252 | 8909  | 657   | 33    |
| H(15) | 9826  | 6361  | 1288  | 50    |
| H(13) | 10501 | 7458  | 2285  | 50    |
| H(14) | 11698 | 7008  | 1401  | 50    |
| H(17) | 5629  | 9474  | -729  | 33    |
| H(18) | 7545  | 10010 | -671  | 33    |
| H(20) | 5970  | 7939  | -2178 | 57    |
| H(21) | 7891  | 8478  | -2120 | 57    |
| H(19) | 6175  | 9311  | -2700 | 57    |

## 7. Computational Details

All geometries were calculated at the wB97X-D level of theory.<sup>[1]</sup> The palladium and cesium atoms were fully described by the SDD basis set, and the rest of the atoms were described by the def2-SVP basis set (BS1 basis set).<sup>[2]</sup> All geometry computations were performed with ultrafine integration grid (integral(Grid=*UltraFine*)) with Gaussian 16 rev.B program.<sup>[3]</sup> The ground states and transition states geometries were confirmed by the absence and presence of the imaginary frequency. Then single point energy withn toluene solvent at the same level of theory was used within the SMD solvation model.<sup>[4]</sup> In order to provide more precise energy, we choose wB97M-V<sup>[5]</sup> functional which is one of the best performing in the reaction energies and reaction barriers benchmark for metalorganic molecules.<sup>[6]</sup> Therefore, resulting structures were used for the energy (single points) calculations at wB97M-V/def2-TZVPP/def2-SD (BS2 basis set) level of theory with Orca 4.2.1 software in a vacuum.<sup>[7]</sup> The def2-SD effective core potential basis set was used for palladium and cesium atoms together with tight SCF criteria. We reported solvated electronic energies ( $\Delta E_{\text{toluene}}(\text{wB97M-V/BS2//wB97X-D/BS1})$ ) as it better describe the system with many low frequenscies modes and compounent changes than usually used Gibbs Free energies (also reported here). Post-processing visualization was carried out with the ChemCraft software.<sup>[10]</sup>

Density functional theory (DFT) calculations were carried out to provide suggestions for the plausible mechanism. *Cis*- and *trans*-1-bromopropene and (*Z*)- and (*E*)- $\beta$ -phenyl vinyl bromide (**4a** and **2d**) were used as the model substrates to represent alkyl and aryl vinyl bromide substrates, respectively. After the oxidative addition to give the alkenyl-Pd bromide intermediates, the reactions with Cs-carboxylate **1a** (**Cs-1a**) were evaluated. In the case of **2d**, the transition state (TS) energy barrier of the  $\beta$ -alkenylpalladation to **Cs-1a** (where Pd is added  $\beta$  to COOCs, e.g. 1,2-insertion of **Cs-1a** to the alkenyl-Pd bond) is 14.1 kcal/mol and over 23 kcal/mol more favorable than those for  $\gamma$ -alkenylpalladation (2,1-insertion of **Cs-1a**) and C–H activation and oxapalladation (lactonization) of **Cs-1a** pathways, respectively, in good agreement of the excellent regioselectivity a Heck-type process (See Figure S2). Similar trends of reactivity was also observed for *cis*- and *trans*-1-bromopropene, consistent with the formation of Heck-type products when alkyl-vinyl bromides were employed (See Figure S3 and S4). In contrast to these similar reaction profiles for **2d** and 1-bromopropenes, when **4a** was used, the steric interactions between

the (*Z*)-phenyl group to Pd and coordinated **Cs-1a**, appeared to substantially increase the energy barriers. Attempts to locate meaningful structures failed, but the results indicated that the energy difference between the  $\gamma$ -alkenylpalladation and the oxapalladation transition states became much smaller (3.9 kcal/mol) (See Figure S5). While the preliminary computational study was not able to suggest the reaction pathway leading to the alkenylative lactonization product for **4a**, striking differences were observed when compared with substrates that gave Heck-type alkenylation products,  $\gamma$ -alkenylpalladation and oxapalladation may be feasible. We therefore proposed that selective carbopalladation (pathway I, most favorable) at the  $\beta$ -position of **B'** may occur to give **C'-Pd-6** or **B'** may undergo oxapalladation to give **D** (pathway II). After sequential  $\beta$ -Hydride elimination, *E/Z* isomerization, carboxypalladation and reductive elimination from intermediate **C'-Pd-6** to give the lactone product **5**. (See Figure S6).

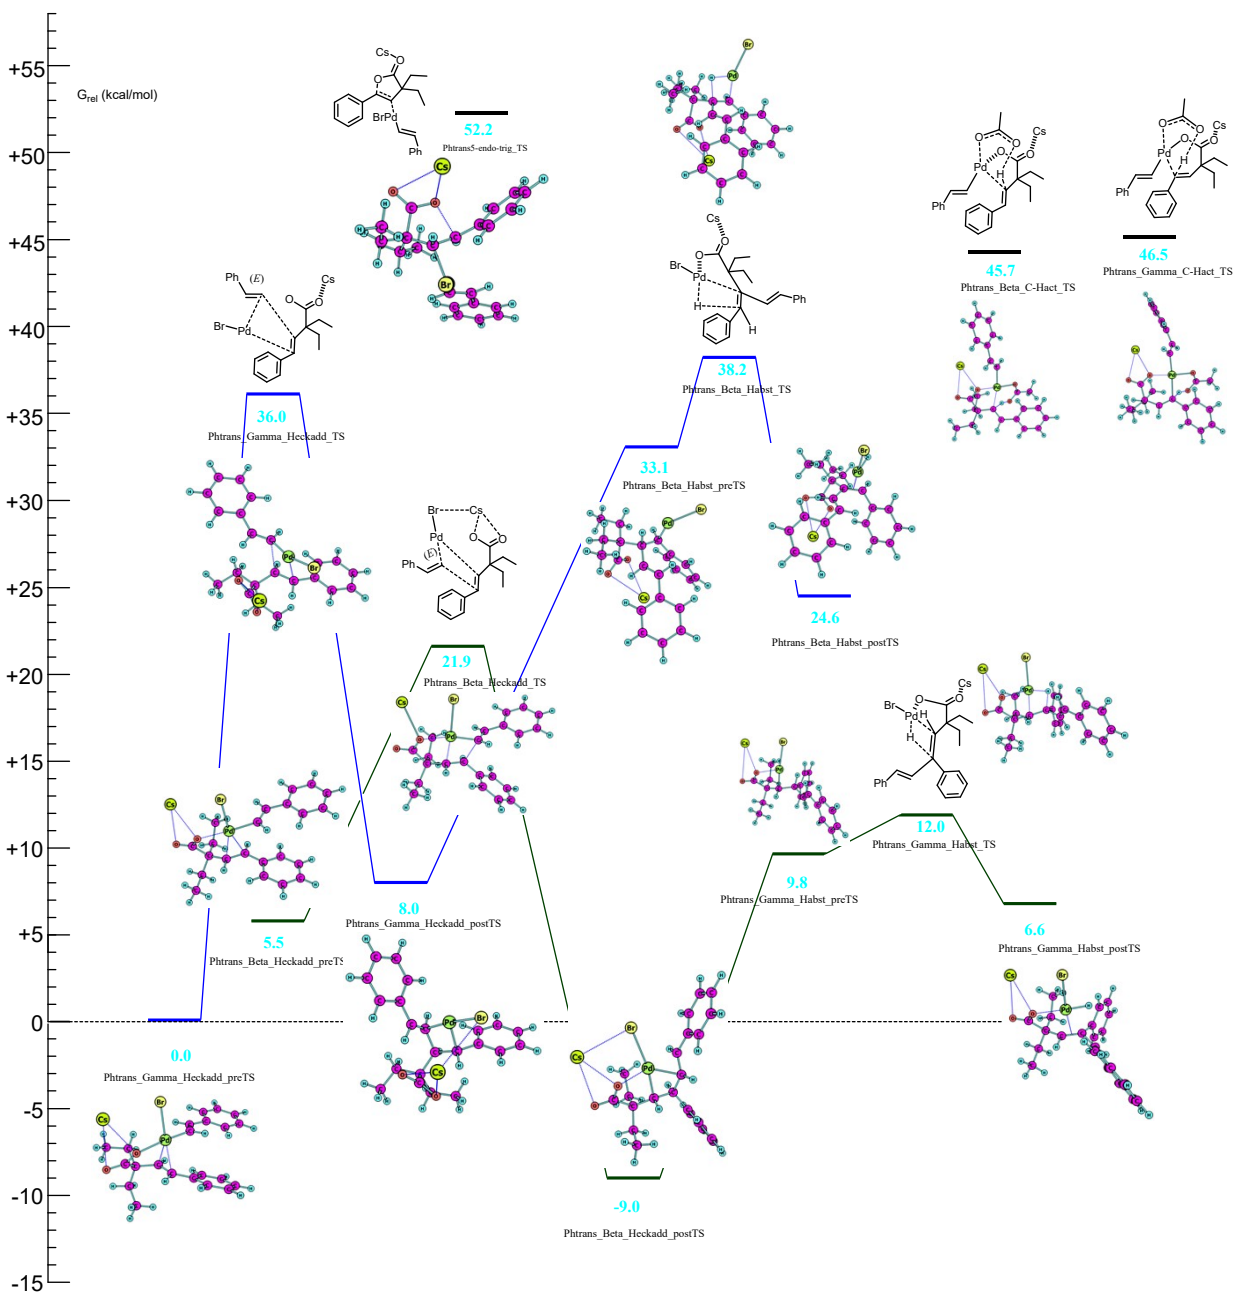

**Fig. S2** Model reaction profile of  $(E)$ - $\beta$ -phenyl vinyl bromide after oxidation addition.



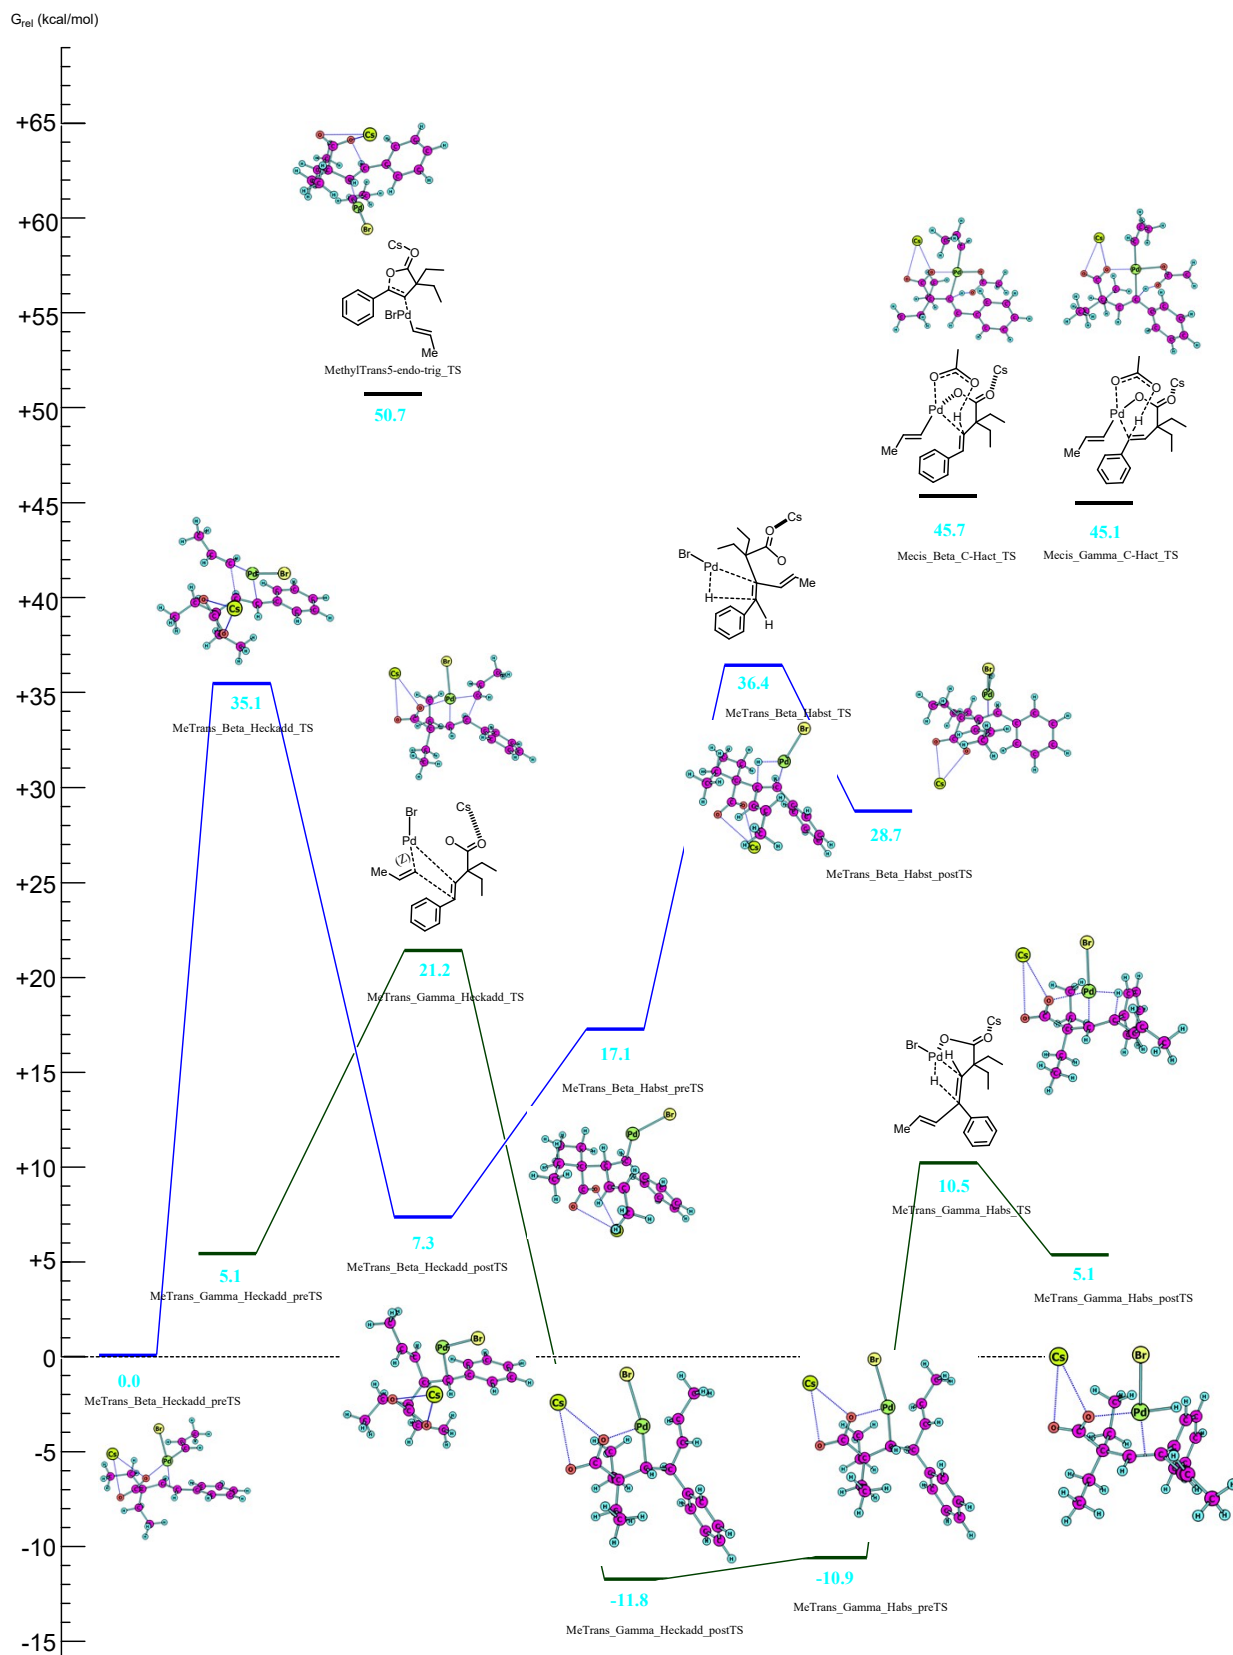

**Fig. S3** Model reaction profile of *trans*-1-bromopropene after oxidation addition.

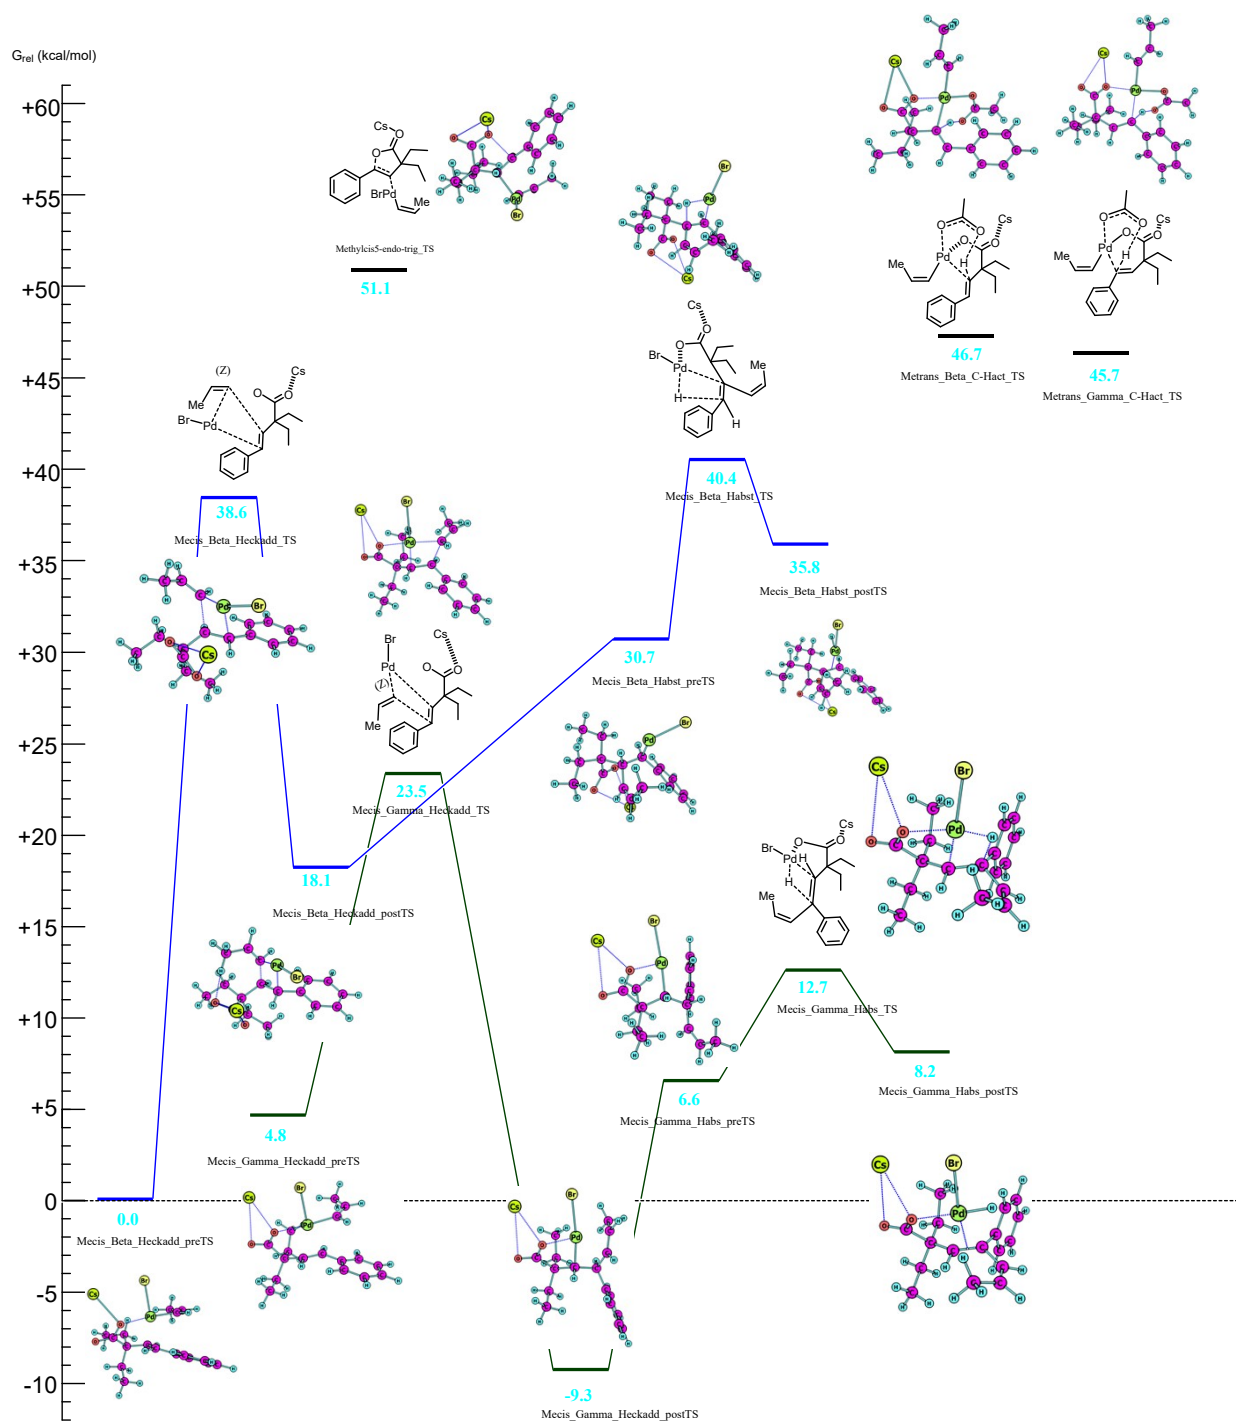

**Fig. S4** Model reaction profile of *cis*-1-bromopropene after oxidation addition.

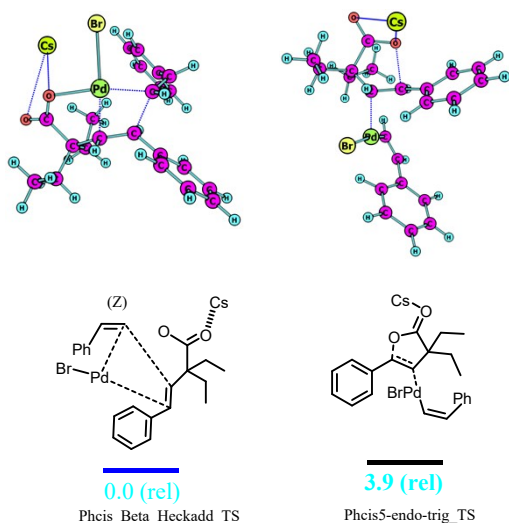

**Fig. S5** Computationally located transition states of Heck addition and lactonization for (Z)-β-phenyl vinyl bromide.

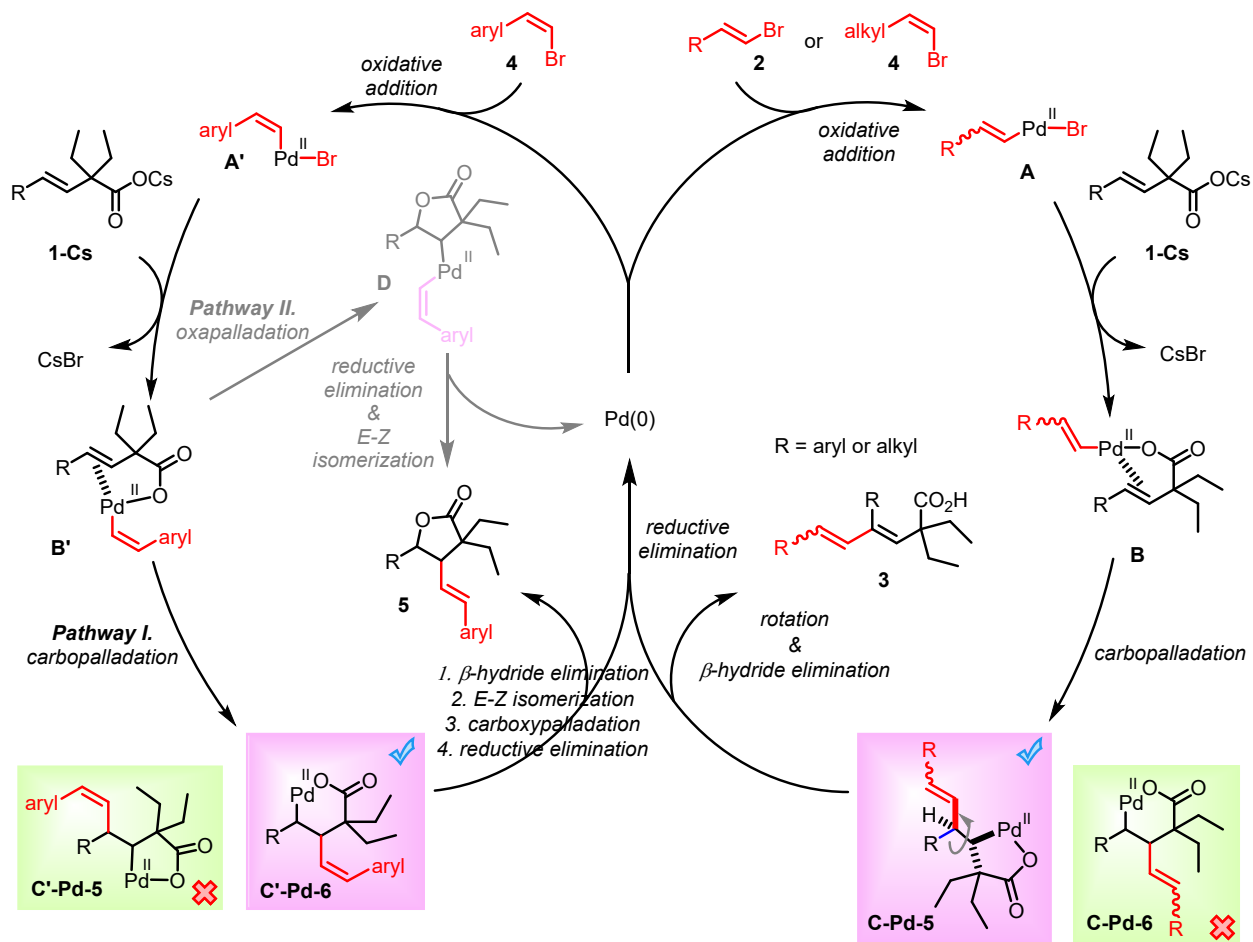

**Fig. S6** Proposed mechanisms

## References:

1. Zhao, Y. D.; Truhlar, G. *J. Chem. Phys* **2006**, *125*, 194101.
2. (a) M. Dolg, U. Wedig, H. Stoll, H. Preuss, *J. Chem. Phys* **1987**, *86*, 866. (b) Andrae, D.; Häußermann, U.; Dolg, M.; Stoll, H.; Preuß, H. *Theor. Chim. Acta* **1990**, *77*, 123. (c) Bergner, A.; Dolg, M.; Küchle, W.; Stoll, H.; Preuß, H. *Mol. Phys.* **1993**, *80*, 1431. (d) Weigend, F.; Ahlrichs, R. *Phys. Chem. Chem. Phys.* **2005**, *7*, 3297.
3. (a) Weigend, F. *Phys Chem Chem Phys* **2006**, *8*, 1057. (b) Frisch, M. J.; Trucks, G. W.; Schlegel, H. B.; Scuseria, G. E.; Robb, M. A.; Cheeseman, J. R.; Scalmani, G.; Barone, V.; Petersson, G. A.; Nakatsuji, H.; Li, X.; Caricato, M.; Marenich, A. V.; Bloino, J.; Janesko, B. G.; Gomperts, R.; Mennucci, B.; Hratchian, H. P.; Ortiz, J. V.; Izmaylov, A. F.; Sonnenberg, J. L.; Ding, Williams, F.; Lipparini, F.; Egidi, F.; Goings, J.; Peng, B.; Petrone, A.; Henderson, T.; Ranasinghe, D.; Zakrzewski, V. G.; Gao, J.; Rega, N.; Zheng, G.; Liang, W.; Hada, M.; Ehara, M.; Toyota, K.; Fukuda, R.; Hasegawa, J.; Ishida, M.; Nakajima, T.; Honda, Y. Kitao, O.; Nakai, H.; Vreven, T.; Throssell, K.; Montgomery Jr., J. A.; Peralta, J. E.; Ogliaro, F.; Bearpark, M. J.; Heyd, J. J.; Brothers, E. N.; Kudin, K. N.; Staroverov, V. N.; Keith, T. A.; Kobayashi, R.; Normand, J.; Raghavachari, K.; Rendell, A. P.; Burant, J. C.; Iyengar, S. S.; Tomasi, J.; Cossi, M.; Millam, J. M.; Klene, M.; Adamo, C.; Cammi, R.; Ochterski, J. W.; Martin, R. L.; Morokuma, K.; Farkas, O.; Foresman, J. B.; Fox, D. J.; *Gaussian 16, Revision B.01, Gaussian Inc.*, Wallingford, CT, **2016**.
4. Marenich, A. V.; Cramer, C. J.; Truhlar, D. G. *J. Phys. Chem. B* **2009**, *113*, 6378.
5. Mardirossian, N.; Head-Gordon, M. *J. Chem. Phys* **2016**, *144*, 214110.
6. (a) Iron, M. A.; Janes, T. *J. Phys. Chem. A* **2019**, *123*, 3761. (b) Chan, B.; Gill, P. M. W.; Kimura, M. *J. Chem. Theory Comput.* **2019**, *15*, 3610. (c) Dohm, S.; Hansen, A.; Steinmetz, M.; Grimme, S.; Checinski, M. P. *J. Chem. Theory Comput.* **2018**, *14*, 2596.
7. (a) F. Neese, *WIREs Comp Mol Sci* **2012**, *2*, 73. (b) Neese, F. *WIREs Comp Mol Sci* **2018**, *8*, e1327.
8. (a) Ryu, H.; Park, J.; Kim, H. K.; Park, J. Y.; Kim, S.-T.; Baik, M.-H.; *Organometallics* **2018**, *37*, 3228. (b) Martin, R. L.; Hay, P. J.; Pratt, L. R. *J. Phys. Chem. A* **1998**, *102*, 3565. (c) Bühl, M.; Sieffert, N.; Wipff, G. *Chem. Phys. Lett.* **2009**, *467*, 287.
9. (a) Sieffert, N.; Buehl, M. *Inorg. Chem.* **2009**, *48*, 4622. (b) Goodfellow, A. S.; Bühl, M. *Molecules* **2021**, *26*, 4072. (c) Harvey, J. N.; Himo, F.; Maseras, F.; Perrin, L. *ACS Catal.*

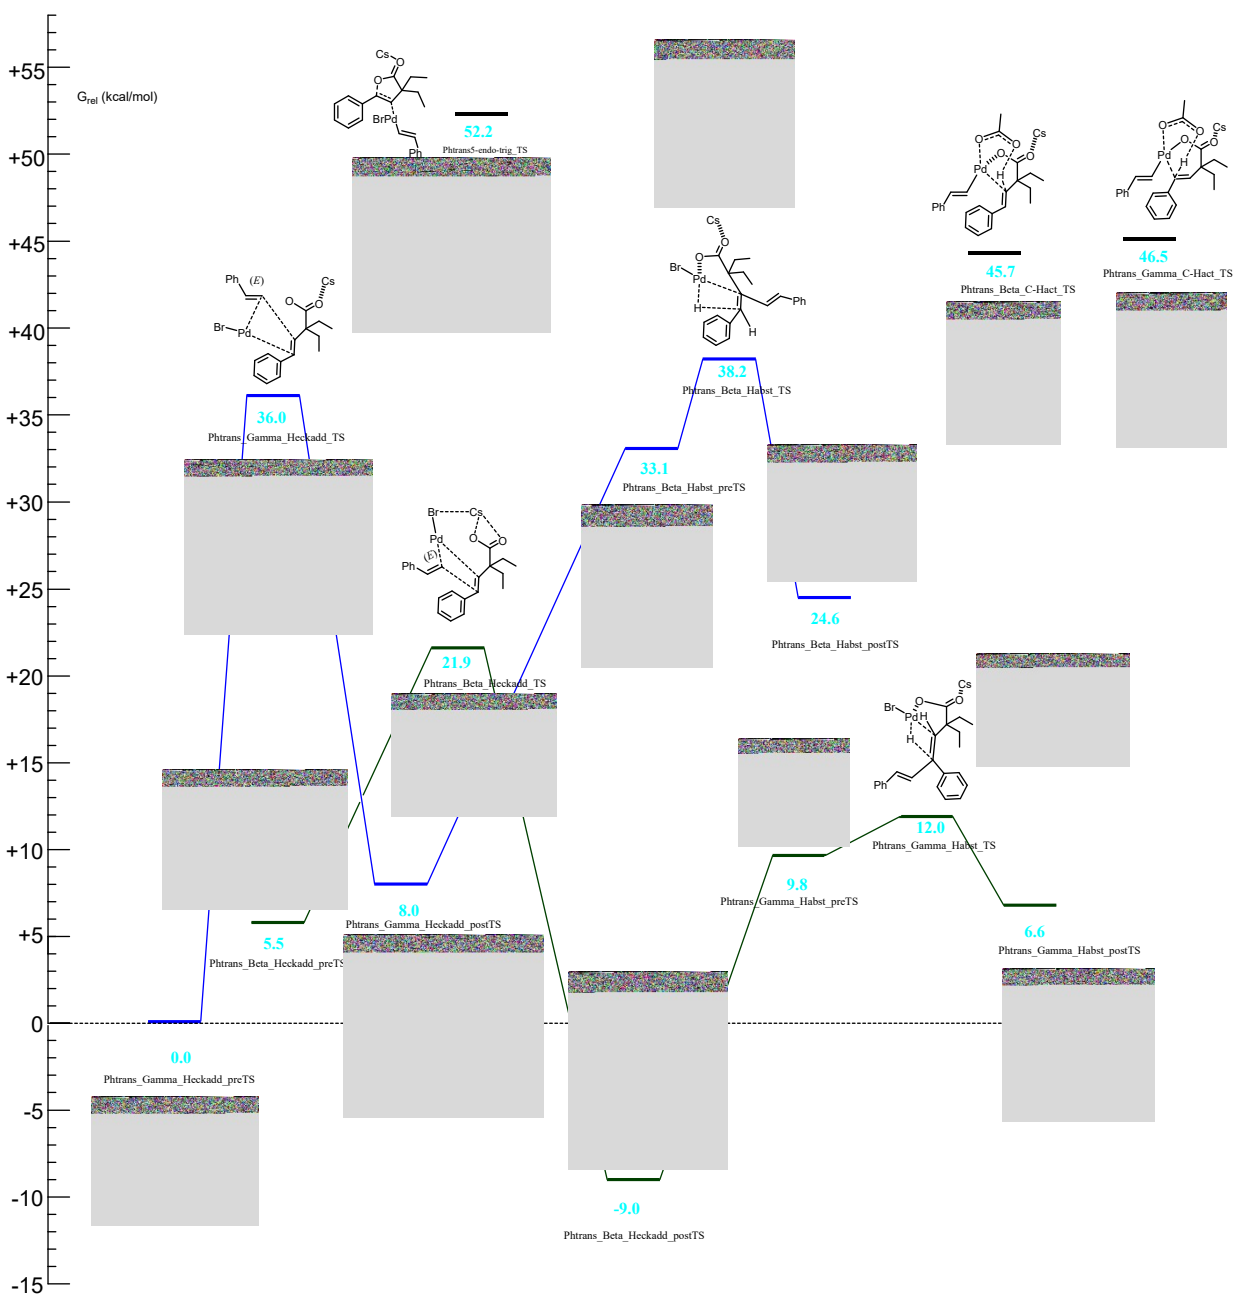

**Fig. S2** Model reaction profile of (*E*)- $\beta$ -phenyl vinyl bromide after oxidation addition.

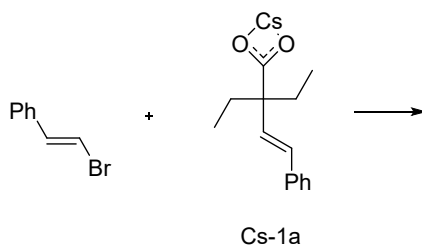

|                              | 1 <sup>st</sup><br>frequency<br>(cm <sup>-1</sup> ) | Electronic<br>energy | wB97X-D/BS1 |                 |                   |               | Electronic<br>energy<br>in toluene | wB97M-<br>V/BS2<br>Electronic<br>energy |
|------------------------------|-----------------------------------------------------|----------------------|-------------|-----------------|-------------------|---------------|------------------------------------|-----------------------------------------|
|                              |                                                     |                      | ZPE corr    | Thermal<br>corr | Enthalpy<br>corr: | Gibbs<br>corr |                                    |                                         |
| Phtrans_Beta_C-Hact_TS       | -1178.4                                             | -1378.6326           | 0.454594    | 0.503638        | 0.504851          | 0.356906      | -1378.667289                       | -1379.726104                            |
| Phtrans_Gamma_C-Hact_TS      | -1231.1                                             | -1378.63047          | 0.454423    | 0.503568        | 0.504782          | 0.356042      | -1378.665014                       | -1379.724195                            |
| Phtrans_Gamma_Heckadd_preTS  | 16.8                                                | -3724.3734           | 0.408193    | 0.453109        | 0.454322          | 0.312926      | -3724.41118                        | -3725.321127                            |
| Phtrans_Gamma_Heckadd_TS     | -210.4                                              | -3724.31749          | 0.407706    | 0.451877        | 0.45309           | 0.313377      | -3724.351293                       | -3725.268165                            |
| Phtrans_Gamma_Heckadd_postTS | 16.9                                                | -3724.37745          | 0.411364    | 0.455019        | 0.456232          | 0.319534      | -3724.411542                       | -3725.318616                            |
| Phtrans_Beta_Heckadd_preTS   | 16.1                                                | -3724.3632           | 0.408474    | 0.453447        | 0.45466           | 0.314211      | -3724.400413                       | -3725.31416                             |
| Phtrans_Beta_Heckadd_TS      | -329.8                                              | -3724.3366           | 0.407656    | 0.45172         | 0.452933          | 0.313652      | -3724.374494                       | -3725.286845                            |
| Phtrans_Beta_Heckadd_postTS  | 18.5                                                | -3724.39328          | 0.410676    | 0.454516        | 0.455729          | 0.317548      | -3724.429857                       | -3725.341168                            |
| Phtrans_Beta_Habst_preTS     | 22.4                                                | -3724.34203          | 0.410457    | 0.453975        | 0.455188          | 0.320273      | -3724.379173                       | -3725.276389                            |
| Phtrans_Beta_Habst_TS        | -426.6                                              | -3724.32416          | 0.406027    | 0.449985        | 0.451198          | 0.314126      | -3724.362832                       | -3725.260477                            |
| Phtrans_Beta_Habst_postTS    | 11.7                                                | -3724.34028          | 0.407241    | 0.451728        | 0.452942          | 0.314137      | -3724.379726                       | -3725.28147                             |
| Phtrans_Gamma_Habst_preTS    | 12.3                                                | -3724.35735          | 0.407881    | 0.452351        | 0.453565          | 0.311205      | -3724.396809                       | -3725.302126                            |
| Phtrans_Gamma_Habst_TS       | -754.9                                              | -3724.35308          | 0.40522     | 0.449239        | 0.450452          | 0.311444      | -3724.391127                       | -3725.300039                            |
| Phtrans_Gamma_Habst_postTS   | 17.9                                                | -3724.36344          | 0.406979    | 0.451525        | 0.452738          | 0.313188      | -3724.400321                       | -3725.311741                            |
| Phtrans5-endo-trig_TS        | -320.8                                              | -3724.29531          | 0.408104    | 0.452127        | 0.45334           | 0.314672      | -3724.337026                       | -3725.235642                            |

## Cartesian Coordinates

### CsAcO

Cs 1.784362 -2.472394 -4.05795  
 O 2.376613 -3.766316 -1.571581  
 C 1.750897 -2.925123 -0.878036  
 O 1.130132 -1.92807 -1.322159  
 C 1.745895 -3.153857 0.636756  
 H 2.779563 -3.262158 0.998238  
 H 1.230644 -4.101372 0.858552  
 H 1.245848 -2.332347 1.166152

### Cs-1a

Cs 3.1171117995 -4.5019059311 -0.4256688418  
 C -1.128382227 -1.0583841134 -0.1195339349  
 C 0.2466801857 -3.135477123 0.1094342813  
 H -0.4535376551 -0.9098979274 -0.968122224  
 C -1.1536665276 -2.4912254026 0.3566597525  
 C -1.8595118356 -0.0417418515 0.3540398615  
 H -2.5273235289 -0.2141336215 1.2054840791  
 O 0.8775571911 -2.7598144645 -0.9079752334

O 0.6205752392 -4.0286314584 0.907198802  
C -1.5922888778 -2.6540312548 1.819679567  
H -1.6002654451 -3.7288033985 2.0463142069  
H -2.634701951 -2.3021107196 1.9222247452  
C -2.1333725902 -3.2404290287 -0.5970384086  
H -3.1259676836 -2.7688596925 -0.4948812565  
H -1.8002306187 -3.0435344861 -1.6288561308  
C -2.2556222398 -4.7472324982 -0.3865379352  
H -2.7069236028 -4.9895147212 0.5870443615  
H -2.8945024365 -5.1906389645 -1.1660001483  
H -1.2726222411 -5.2397106278 -0.4204589246  
C -0.7013067638 -1.9620705032 2.8473784601  
H -0.6444322942 -0.8756484467 2.6844056405  
H -1.0801028138 -2.1303823499 3.8676631685  
H 0.3163272045 -2.3742201945 2.7919797278  
C -1.862906992 1.3427207439 -0.1558325129  
C -1.1136560935 1.7528778868 -1.2719611637  
C -2.646900503 2.3091326506 0.4929946473  
C -1.1476641662 3.0714139186 -1.7133394821  
H -0.4966417269 1.0260530702 -1.8038833173  
C -2.6832658723 3.630805463 0.0525354379  
H -3.2394660882 2.0131778587 1.3631267221  
C -1.9322618124 4.0201115124 -1.0543928369  
H -0.5560388639 3.3634404329 -2.5845234557  
H -3.3032450899 4.3606719764 0.5787312398  
H -1.9577660791 5.0546262662 -1.4040768942

#### CsBr

Cs 1.708546 -2.229305 -3.623699  
Br 2.400845 -4.252946 -1.182366

#### AcOH

C 1.063147 1.135746 0.094491  
C 1.26179 2.593916 0.399629  
O 0.962664 0.254229 0.904525  
O 1.006905 0.906795 -1.227878  
H 1.301256 2.74023 1.484049  
H 2.19342 2.947311 -0.064695  
H 0.43801 3.179748 -0.032315  
H 0.878881 -0.04635 -1.339267

#### HBr

Br 1.001586 0.869937 -1.237214  
H 0.813896 -0.530012 -1.390941

#### (*E*)- $\beta$ -phenyl vinyl bromide

C 4.0242608593 -0.209133646 -1.3700607384

H 4.9042203043 -0.1950295344 -2.0148474525  
C 4.0330575579 0.1274556862 -0.0780618843  
H 3.0889079138 0.0903069827 0.4744429733  
C 5.2097569402 0.5630543646 0.6962167156  
C 5.0195499973 0.9984111711 2.0158309986  
C 6.5154130827 0.5633010757 0.178903815  
C 6.0929810291 1.4275622368 2.7932037342  
H 4.0110006211 1.001802266 2.4372230646  
C 7.5874030206 0.991604966 0.9540743392  
H 6.7026506268 0.2187049917 -0.840134705  
C 7.3816677424 1.4268347079 2.2645190189  
H 5.9201940325 1.7635014769 3.8178742951  
H 8.5951620411 0.982848914 0.5332148257  
H 8.2259517574 1.7611861058 2.8710104658  
Br 2.4671294736 -0.756362765 -2.2710964658

StyreneBr\_Trans\_Pd

Pd 0.6619504829 -1.0894139168 -0.5965778395  
C 4.1179046318 -0.4387524075 -1.3248666979  
H 4.983117568 -0.4246163265 -1.9888339262  
C 4.1070172705 -0.0424790807 -0.0520951264  
H 3.1574498471 -0.1150590971 0.4927123401  
C 5.2521361714 0.4896765811 0.706738699  
C 5.050923874 0.8632232688 2.0433619272  
C 6.5360177233 0.6421325824 0.1586828479  
C 6.0955381376 1.3733302834 2.8109265005  
H 4.0577819972 0.7509000881 2.4856308295  
C 7.5789771116 1.1511896492 0.9242340434  
H 6.7282522713 0.3607718 -0.8787098236  
C 7.3637831236 1.5192346879 2.2537257214  
H 5.916213982 1.6579253322 3.8498355265  
H 8.5705019477 1.2623540612 0.4801757292  
H 8.1851619877 1.9187041571 2.8522086937  
Br 2.5753198723 -1.1080356628 -2.197243445

TransPath\_1\_TS\_C-Hact\_Beta\_1329

C -1.0733459161 0.1985150311 -0.0051662039  
H -0.6803080975 1.0125951762 0.6186195969  
Pd -0.2345759494 0.4872559899 -1.9113864686  
C 0.9099038007 -1.1827943299 0.3420098333  
C -0.6432107803 -1.1747168675 0.5136458066  
C -2.1452741139 0.5337790644 -0.8402649954  
H -2.7392611405 -0.2729950412 -1.283493882  
O 1.3346083656 -1.030280452 -0.8511872388  
O 1.6498805742 -1.2271243345 1.3344923819  
C -1.0386747345 -1.3402243274 1.9987677873  
H -0.4924262609 -2.2092138873 2.3935617344



H -2.1138694298 -1.5870025788 2.0380183764  
C -1.2408814756 -2.3221776383 -0.3243601604  
H -2.3397777178 -2.2879002147 -0.2322693886  
H -1.0069023588 -2.1313480436 -1.3833202504  
C -0.7421566088 -3.7134356564 0.0523083864  
H -1.0260068872 -3.9949068743 1.0773567776  
H -1.164026382 -4.4704018605 -0.6257669124  
H 0.3547846309 -3.7751982323 -0.0216771322  
C -0.7711668695 -0.1529950779 2.9205376979  
H -1.4193592179 0.707538212 2.6930086136  
H -0.9597927489 -0.4328757255 3.9680977199  
H 0.2812227467 0.1578623915 2.8461016024  
C -2.8049932358 1.86127953 -0.879375896  
C -3.7727852934 2.116330656 -1.8651684727  
C -2.5295771148 2.8872819062 0.0391912666  
C -4.4163306577 3.3470155228 -1.9488252689  
H -4.007243083 1.3303968904 -2.5882602141  
C -3.1693575918 4.1213870298 -0.0450982717  
H -1.8105582313 2.7151665674 0.8434009684  
C -4.1145346664 4.3632454957 -1.0416617487  
H -5.1610296554 3.5152542017 -2.73064929  
H -2.9357688762 4.9001929223 0.6854403664  
H -4.6186267948 5.3300316223 -1.1041813466  
C 2.5403898163 1.0826902027 -3.9213562432  
H 3.1586555065 1.8202724336 -4.4367044238  
C 2.9782527813 0.0717647758 -3.1687919368  
H 2.2376222701 -0.5802324496 -2.6892532939  
C 4.3730830213 -0.1948637342 -2.7746724456  
C 4.5768923492 -1.0956577664 -1.7142520246  
C 5.4857447694 0.448690574 -3.3386063063  
C 5.8590633455 -1.3281304169 -1.2197433141  
H 3.7035749157 -1.5799501054 -1.2628506862  
C 6.7649101825 0.2079435969 -2.8463552509  
H 5.3547815712 1.13657255 -4.1772828157  
C 6.9560366588 -0.6766938659 -1.78238478  
H 5.9988146708 -2.0274994855 -0.3924119027  
H 7.6224896043 0.7105886387 -3.2990319216  
H 7.9619247211 -0.8627352878 -1.3998069187  
Br 0.6788737321 1.4147660811 -4.124300431  
Cs 2.8119508555 1.3556701912 0.1703829208

Phtrans\_Beta\_C-Hact\_TS

H -2.0314128625 1.0792937244 1.5135310137  
C -1.387890075 0.3081739754 0.4524857987  
C 1.0122937053 -0.3994126935 0.6288174305  
C -2.6979006991 2.8651914829 2.1472484993

C -3.8360163995 3.732132831 2.5973802403  
O -2.8390701878 1.6078453974 2.2432121834  
O -1.6850334592 3.4099315781 1.647524854  
H -4.346170247 3.2865651518 3.4598915936  
H -3.4884124769 4.7470071539 2.8208836224  
H -4.5503355144 3.7768111198 1.7596979592  
Pd -0.242187911 2.1294146895 0.8988619575  
C -0.4517399809 -0.8807547593 0.7360702138  
C -2.3778550699 0.236074548 -0.4622749687  
H -2.5808503867 -0.6906744423 -1.0133568683  
O 1.2181393914 0.8420520587 0.3206979588  
O 1.9512908495 -1.151665569 0.8839603867  
C -0.6588815083 -1.3874916273 2.1884900077  
H -0.0678951503 -2.3068662936 2.3088743622  
H -1.7198356905 -1.6692845468 2.293980352  
C -0.6797698593 -2.0527402677 -0.2542747995  
H -1.7375971694 -2.3495712418 -0.1602378816  
H -0.5664610024 -1.6552793037 -1.2766080724  
C 0.1755299626 -3.3107235594 -0.1213566779  
H 0.0248482281 -3.8146749219 0.8450242626  
H -0.1079141235 -4.0278286219 -0.9072527823  
H 1.2451662452 -3.0885955274 -0.2158040869  
C -0.269331908 -0.4328334045 3.3135274943  
H -0.8566568668 0.4949613362 3.3087913457  
H -0.4185682465 -0.9164818458 4.2906602395  
H 0.796836297 -0.1619033701 3.2464265267  
C -3.3420997204 1.3228039452 -0.7621059091  
C -4.7203501075 1.0620360357 -0.7066515827  
C -2.9251995283 2.6176474408 -1.0959620367  
C -5.6504360014 2.072410746 -0.9318195012  
H -5.061762069 0.0537161513 -0.4580826503  
C -3.8549593123 3.6319996631 -1.3243075617  
H -1.8567156405 2.828582428 -1.1764889831  
C -5.2199279446 3.3657216817 -1.2365382275  
H -6.7186023816 1.8517191 -0.8682099756  
H -3.5051848924 4.6359375411 -1.5749974683  
H -5.9487607663 4.1594916331 -1.4163726045  
C 1.1129443949 3.577178 1.1634964527  
H 0.9636572062 4.2387070461 2.0325372848  
C 2.224124787 3.7215443028 0.4196315552  
H 2.3498034548 3.0621094469 -0.4504665358  
C 3.4007874251 4.5667902698 0.7121040651  
C 4.5908149097 4.342101774 -0.0023298832  
C 3.4306410493 5.5263991587 1.7395349024  
C 5.7644953264 5.0305261132 0.3022433268  
H 4.5863918704 3.6126574636 -0.8187774642

C 4.5994763357 6.2174593458 2.04211113  
H 2.5192580353 5.7363466682 2.3036433999  
C 5.7763170729 5.9707536525 1.3307418579  
H 6.6726230733 4.8366543944 -0.2738758795  
H 4.5930741972 6.9627918944 2.8411641657  
H 6.6912433761 6.5163407797 1.5710467957  
Cs 3.6379799661 1.1709072727 1.9903221623

Phtrans\_Gamma\_C-Hact\_TS

C 0.2325438245 1.5841316291 0.1728210309  
H 0.0358258561 0.275095758 0.7210255046  
C 1.0679761531 -1.4266526497 0.7747814304  
C 1.9240966143 -2.4093820436 1.5184821791  
O 0.2868214729 -0.685700348 1.4456856033  
O 1.1889881131 -1.3418175987 -0.471611834  
H 2.2546566482 -3.2160653803 0.8546134443  
H 2.8079734483 -1.8650972616 1.8847694539  
H 1.3857691806 -2.8067241937 2.3875599974  
Pd -0.0751031043 0.0242671624 -1.3669768129  
O -1.501002466 1.1876899323 -2.272196602  
C -0.6526841963 2.5971854795 0.1139108354  
H -0.2946317891 3.5849549714 0.4436057519  
C -2.0951906896 2.6242141845 -0.3500484617  
C -2.3945523421 1.896178969 -1.6785161164  
O -3.5297152738 2.0171229596 -2.1480954505  
C -3.0421605664 2.0170783518 0.7222107365  
H -2.8181489306 2.5021667549 1.6868810772  
H -4.0667616349 2.3118460324 0.4459244242  
C -2.5084610496 4.1025441482 -0.5603064933  
H -3.5823303381 4.1245511554 -0.7936216626  
H -2.3737317769 4.6299593037 0.3997748198  
C -1.7407617877 4.8216219878 -1.6640661101  
H -1.9281393378 4.3523087781 -2.642033058  
H -2.0534150089 5.8740918376 -1.7350945362  
H -0.6539181225 4.8061746655 -1.4892666303  
C -2.9921843028 0.5036151447 0.8860851807  
H -2.0121847669 0.1479568438 1.2278252918  
H -3.7399268634 0.1738260138 1.6231254921  
H -3.2189494472 -0.0081593921 -0.0640295915  
C 1.5986302978 1.8906120371 0.6967150609  
C 2.7464692111 1.5035525346 -0.0120334665  
C 1.7738962933 2.5385152832 1.9288606497  
C 4.0208553898 1.7731330355 0.4836998  
H 2.6326558466 0.9907399054 -0.9701090027  
C 3.0470746183 2.8069885652 2.427414112  
H 0.8910155642 2.8189395789 2.509050026

C 4.1779255392 2.4258700891 1.7061357761  
H 4.8988744039 1.471043953 -0.0923989036  
H 3.1564879636 3.3109087258 3.3909171699  
H 5.1769353474 2.6325175608 2.0968367301  
C -0.3677111869 -1.1888042598 -2.9179616257  
H -0.3525349418 -0.6651296657 -3.889777106  
C -0.8117854958 -2.457557273 -2.8872003826  
H -0.8679556019 -2.9856187297 -1.9269517578  
C -1.425106693 -3.16432987 -4.0330830818  
C -2.3995216785 -4.1484438958 -3.7905796725  
C -1.188239477 -2.7982620806 -5.3708750667  
C -3.1378317589 -4.7110748201 -4.8309182129  
H -2.589129356 -4.4614566395 -2.7595944126  
C -1.9247837438 -3.3590733703 -6.4108142191  
H -0.4112249424 -2.0633794967 -5.593603352  
C -2.9129961455 -4.3106471887 -6.1478066796  
H -3.8926815052 -5.470026122 -4.6111280004  
H -1.7178718995 -3.0590306033 -7.4410288554  
H -3.4875883265 -4.7508049399 -6.9654598593  
Cs -3.6499222384 -0.552305509 -3.6305395612

Phtrans\_Gamma\_Heckadd\_preTS

C -1.4756274892 1.377949491 -3.532823105  
C -1.576566544 -0.1749800378 -0.8985693465  
Pd -1.9262354962 -0.4610102213 -3.0131089641  
C -1.8903506692 -2.6866627162 -1.0950281098  
Br -1.3236312501 -1.2669775244 -5.2836342091  
H -0.8408449224 0.6267698321 -0.7689393029  
C -1.1072795677 -1.5392560905 -0.4079443676  
C -2.8960704485 0.1905710311 -1.1347047871  
H -3.6644690125 -0.5855435647 -1.0599476635  
O -1.8761540898 -3.8177974693 -0.6124815689  
O -2.4168220516 -2.4085574232 -2.2315999342  
C 0.3792717663 -1.6911735233 -0.8480011895  
H 0.9297121176 -0.8162681504 -0.4611627072  
H 0.4170716831 -1.5945740403 -1.9477717827  
C -1.2262950231 -1.636695982 1.1251378011  
H -0.8717479782 -2.638231054 1.4085559544  
H -0.533986592 -0.9058469836 1.5787698259  
C -2.6307113688 -1.4427889173 1.6837309409  
H -3.3348589485 -2.1539270452 1.2250922935  
H -2.6395026987 -1.6232194282 2.7686649582  
H -3.0110580994 -0.4240715892 1.5158697284  
C 1.1041016051 -2.9627744163 -0.4197080268  
H 0.5420494271 -3.8646713691 -0.701733354  
H 2.1026623513 -3.0027590565 -0.8807471084

H 1.2443799054 -3.0074799032 0.6699346881  
C -3.4227820651 1.5734646725 -1.173740178  
C -4.7510570805 1.7685527304 -1.5762758348  
C -2.6488069778 2.6981323744 -0.8553871697  
C -5.2882455901 3.0493561433 -1.6753055221  
H -5.363651033 0.8994517719 -1.8300320916  
C -3.1838983094 3.9788315046 -0.9535344782  
H -1.6111758473 2.5791399323 -0.5411707976  
C -4.5039038772 4.1601833709 -1.3670471824  
H -6.3235849046 3.180537754 -1.9970683839  
H -2.5599485834 4.8420721368 -0.713500851  
H -4.9209192363 5.1664560258 -1.4461616834  
H -2.3426989496 1.9443301652 -3.9015249923  
C -0.2815052584 1.9609145784 -3.3811105846  
H 0.5713736146 1.3533875799 -3.0531433803  
C 0.0253945446 3.3874317762 -3.6150703301  
C -0.9736531726 4.3632447462 -3.7705895794  
C 1.3637306367 3.8066950753 -3.6611186712  
C -0.6429057797 5.6986666481 -3.9791086667  
H -2.0251316863 4.0747178473 -3.7119701318  
C 1.6965714588 5.1436786026 -3.8682482287  
H 2.1569636472 3.0641469179 -3.5376075802  
C 0.6936764844 6.0978425841 -4.0302638335  
H -1.4386058712 6.4383223923 -4.0969962054  
H 2.7471933616 5.4417056602 -3.9037650226  
H 0.950442537 7.1472147041 -4.1912867919  
Cs -1.1602426687 -4.5161465428 -3.7121244917

Phtrans\_Gamma\_Heckadd\_TS

C -1.2840068268 2.0284929264 -2.6581656899  
C -1.8847362125 0.6007576598 -1.107631382  
Pd -2.8430342012 0.9280910319 -3.2170678243  
C -1.0500057521 -1.577826343 -2.0224053471  
Br -4.731907028 0.0101058209 -4.5577250258  
H -1.6745492133 1.4824923067 -0.4934833311  
C -0.8695577079 -0.5250825677 -0.8844304519  
C -3.2685351516 0.30116841 -1.3093140091  
H -3.5047768561 -0.7580287018 -1.4535384287  
O -1.8473710485 -2.5183254733 -1.8194236969  
O -0.4347829903 -1.3567102362 -3.0945096257  
C 0.5773482473 0.010879315 -0.8618544118  
H 0.6296709059 0.8593036351 -0.1554295735  
H 0.8224689589 0.4104918164 -1.8473127676  
C -1.1528254665 -1.1304219822 0.5287952956  
H -0.5420437735 -2.0427991132 0.585925512  
H -0.7309287437 -0.4314990366 1.2730552247

C -2.5696661378 -1.4980466457 0.9563028547  
H -3.0202754314 -2.1894655164 0.2337807157  
H -2.5290656894 -2.0021183792 1.9342029959  
H -3.2244740665 -0.6223631231 1.0794522059  
C 1.6422428735 -1.0223990061 -0.5069165891  
H 1.5687354133 -1.8959409033 -1.1727685221  
H 2.6449414073 -0.5892822564 -0.6394731779  
H 1.5733543324 -1.3738134941 0.5327398745  
C -4.3852536864 1.1231959427 -0.7814021546  
C -5.6735712485 0.5715867223 -0.7849250315  
C -4.2131757811 2.4207185178 -0.2778183364  
C -6.7590120477 1.2926047882 -0.2979851238  
H -5.8191423314 -0.4311021638 -1.192435232  
C -5.2987377512 3.1438258781 0.2064754092  
H -3.2224540933 2.8801834029 -0.2658837641  
C -6.5757223666 2.5823421794 0.1990257676  
H -7.7555277804 0.8465308398 -0.3114232285  
H -5.1467647729 4.1537502365 0.5931925892  
H -7.4268682151 3.1510587167 0.5793317084  
H -1.4783099332 2.9906550843 -2.1697231873  
C -0.1980478449 1.7665262034 -3.4063787538  
H -0.0368666928 0.7181335012 -3.6950516516  
C 0.8376675214 2.730500624 -3.8137126361  
C 0.6668028778 4.1213300701 -3.726934037  
C 2.0560669218 2.2353337003 -4.3025786051  
C 1.6899301427 4.9860881325 -4.1009748384  
H -0.2839741825 4.5310711297 -3.3786314606  
C 3.081266875 3.1014058085 -4.675364842  
H 2.196654741 1.1539590162 -4.378981918  
C 2.902113487 4.4799344951 -4.5740694892  
H 1.53925125 6.065634262 -4.0307409702  
H 4.025037738 2.6973304243 -5.0481170902  
H 3.7028258588 5.1613876096 -4.8694656404  
Cs -2.4807415272 -2.7792882659 -4.6835323083

Phtrans\_Gamma\_Heckadd\_postTS

C -0.832277487 1.8435021064 -1.6474143152  
C -1.4484284046 0.7357750167 -0.7850886798  
Pd -2.3077382558 1.6905647284 -3.228151018  
C -0.7934681974 -1.4992250624 -1.8630769244  
Br -4.0420509516 1.3217210497 -4.9560552988  
H -1.6095692897 1.151507297 0.2212273327  
C -0.6688585559 -0.6066487653 -0.5828407765  
C -2.7701460523 0.6246935549 -1.528723012  
H -2.9720646213 -0.378300494 -1.9222936899  
O -1.800169572 -2.2368527376 -1.9554136313

O 0.0773881999 -1.3657827864 -2.7605514531  
C 0.8095637749 -0.2789656151 -0.2907125485  
H 0.8465243654 0.4594668278 0.5316542421  
H 1.2496169771 0.2070224634 -1.1703442691  
C -1.2676617064 -1.3364951629 0.6486542029  
H -0.8598821606 -2.3583446816 0.6577793622  
H -0.8658579823 -0.8379778036 1.5501121353  
C -2.78498332 -1.4313044202 0.7871949452  
H -3.2191879308 -1.9307785983 -0.087329664  
H -3.038220951 -2.0185754942 1.6832586002  
H -3.2627456953 -0.4470683619 0.9089625398  
C 1.6800676662 -1.4810389056 0.0614866343  
H 1.6355641507 -2.2324944877 -0.7407512166  
H 2.7306536443 -1.1734841352 0.1737526063  
H 1.3760173911 -1.9602963895 1.003702842  
C -3.9809876895 1.3176974773 -1.0330827667  
C -5.2417966994 0.8074239939 -1.3812258963  
C -3.9258932749 2.4673849944 -0.2282522784  
C -6.4074892427 1.4197443322 -0.937721668  
H -5.296403882 -0.0772559371 -2.0190732305  
C -5.0926250685 3.0843937375 0.2123053883  
H -2.9599127739 2.890363245 0.0557164835  
C -6.3370323374 2.5627537009 -0.1406352293  
H -7.3781059733 1.0064628212 -1.2189201546  
H -5.0304688348 3.9788681301 0.8356141571  
H -7.2522947071 3.0478719551 0.2050874915  
H -0.8611051597 2.8580645409 -1.234116894  
C -0.1521427574 1.5982547086 -2.8295541886  
H 0.1085802616 0.552906623 -3.0481155199  
C 0.5194330849 2.6167822019 -3.6604984751  
C 0.2246643931 3.9880701454 -3.5886330295  
C 1.4829575299 2.1836450204 -4.5836355463  
C 0.8826779941 4.8968941672 -4.4109889365  
H -0.5400049677 4.3473676756 -2.8956466646  
C 2.1442461316 3.0940706896 -5.4031695946  
H 1.7168002335 1.1174944445 -4.6428143686  
C 1.8451513422 4.4534360546 -5.3191347577  
H 0.6383216281 5.9592581843 -4.3482013823  
H 2.8963960516 2.7415340156 -6.1120860193  
H 2.3584578284 5.1688769163 -5.9650373893  
Cs -1.9838451461 -1.750625981 -4.8825164758

Phtrans\_Beta\_Heckadd\_preTS

C 0.0457702492 2.1081710008 0.0304726742  
C 0.1701687931 0.8054026777 -2.4108181601  
Br -1.8619580631 1.9385644329 -4.3774661599

H -0.4727094969 1.2415837989 0.4490818537  
O -2.3505114215 4.0361905495 -1.8491308742  
C -0.6290871386 3.2958786482 -0.0707926903  
H -0.0537037246 4.1786749795 -0.3646692117  
C -2.005219836 3.6305553605 0.4809134247  
C -2.8495407312 4.2011716423 -0.6796545119  
O -3.9487740623 4.7080254981 -0.4655771976  
C -2.773159105 2.4339750191 1.0890989592  
H -2.1223170929 1.9413344857 1.8306711557  
H -3.611479836 2.8625588866 1.6585953483  
C -1.8655493016 4.7091224616 1.5820499539  
H -2.8910424499 4.9493175455 1.9016426784  
H -1.3515377553 4.2596177833 2.4488706997  
C -1.1688778767 6.0028221648 1.1731338081  
H -1.6309439995 6.4349416177 0.2719318618  
H -1.2536726968 6.7488619335 1.9766827811  
H -0.0952980803 5.8649912137 0.9755809638  
C -3.3442736391 1.3983233175 0.1239177862  
H -2.5775785582 0.9107872617 -0.4962420123  
H -3.8773883541 0.6131917525 0.6800014638  
H -4.0701531711 1.864462555 -0.5599362887  
C 1.5114027786 1.9289892127 -0.095671849  
C 2.3709122981 2.9395843324 -0.5492362826  
C 2.0610977415 0.6869472627 0.2417570143  
C 3.7382160284 2.7104985656 -0.6579174323  
H 1.9693839929 3.9120859962 -0.8415641705  
C 3.4312134292 0.4564888552 0.1380124137  
H 1.4005060233 -0.1206357346 0.5654331489  
C 4.2750300069 1.467940779 -0.3135051912  
H 4.3918702759 3.5074052281 -1.0190573288  
H 3.8341168067 -0.5251948379 0.394828456  
H 5.34878823 1.2902560421 -0.4036944341  
Pd -1.0025624029 2.3687612812 -2.1019180076  
H 1.1774965657 1.0971061334 -2.7384682476  
C -0.1497423191 -0.4775035089 -2.2130874378  
H -1.1763342395 -0.7318101479 -1.9221115513  
C 0.7607749725 -1.6336423561 -2.3405812802  
C 0.2420971993 -2.9327109783 -2.2255951506  
C 2.1442589066 -1.4983388245 -2.5481553073  
C 1.0647868616 -4.0533827312 -2.320081228  
H -0.8314441687 -3.0621080092 -2.0621784885  
C 2.9670546106 -2.6159430234 -2.6441117233  
H 2.585850911 -0.5028199336 -2.6235149223  
C 2.4339049966 -3.9012066442 -2.5306522277  
H 0.6320701214 -5.0525935578 -2.2288405874  
H 4.0394723459 -2.4818568417 -2.8058250916



H 3.0826930514 -4.7768097593 -2.6043611402  
Cs -4.7889716753 3.711527613 -3.3403572586

Phtrans\_Beta\_Heckadd\_TS

C 0.0653989626 1.8906491361 -0.2905867083  
C 0.1747393627 0.8969340608 -1.964836637  
Br -2.2625369247 1.3838342434 -4.3729462981  
H -0.4437572654 1.1393810489 0.3182920979  
O -2.6073912651 3.9730857781 -1.9823231814  
C -0.6511387043 3.127647548 -0.4537182313  
H -0.0326320706 3.9917674655 -0.7190150774  
C -1.9251133863 3.5441157448 0.2955779498  
C -2.9377583531 4.1051130052 -0.7427557871  
O -4.0091724386 4.5740528254 -0.3740948268  
C -2.6269490463 2.3977742084 1.0592766401  
H -1.8987941314 1.9359070378 1.7475646849  
H -3.3891683555 2.8687394979 1.6977569278  
C -1.5983450074 4.6552764083 1.3213992625  
H -2.5465355987 4.9098705395 1.8198300933  
H -0.9312910517 4.2311716 2.0921642037  
C -0.9934148141 5.9351194935 0.7540966085  
H -1.6263960103 6.3526835601 -0.0440420509  
H -0.908806416 6.6975151085 1.5423911077  
H 0.0162786352 5.7839617393 0.3437758507  
C -3.3170225829 1.3226544103 0.2244616897  
H -2.6447459979 0.8305433382 -0.494323782  
H -3.7494404627 0.5474425938 0.8742532025  
H -4.1436285686 1.7607724163 -0.3551826162  
C 1.5495568022 1.8642374163 -0.0657493899  
C 2.3953922295 2.9028272759 -0.4705447403  
C 2.1134842093 0.7417008329 0.5518727376  
C 3.7689359364 2.8225568673 -0.251875554  
H 1.9856358237 3.7810851764 -0.9730769996  
C 3.4843196092 0.6638660724 0.7802572587  
H 1.4664203382 -0.0914459295 0.8395551843  
C 4.3185361894 1.7058901714 0.3768918223  
H 4.4148879711 3.6411006781 -0.5765283493  
H 3.9032318605 -0.2192321664 1.2670752275  
H 5.3954124625 1.6461976509 0.5480030957  
Pd -1.2475906626 2.3626788817 -2.2293322916  
H 1.1064143984 1.1695521876 -2.4741846395  
C -0.1235406998 -0.4072664086 -1.7907385027  
H -1.0510818317 -0.6716391006 -1.2690682153  
C 0.6973884377 -1.539863682 -2.2327855358  
C 0.1133322301 -2.8099143451 -2.3659284471  
C 2.0702685478 -1.405083336 -2.5009511667

C 0.8674227792 -3.9043463599 -2.7781286777  
H -0.9523753398 -2.9304097871 -2.1548641175  
C 2.8245937437 -2.5012568911 -2.9072220726  
H 2.5555205163 -0.4358126705 -2.3674441581  
C 2.2268434113 -3.7537152378 -3.0521262864  
H 0.3921562659 -4.881885746 -2.8858996492  
H 3.8913494242 -2.3781785749 -3.1071874021  
H 2.8212471043 -4.612304716 -3.3721106516  
Cs -5.0750372659 3.2342099328 -3.2270236019

Phtrans\_Beta\_Heckadd\_postTS

C 0.5140669152 1.4165021223 0.0286247598  
C 0.7434992845 0.6064293498 -1.2404208385  
Br -2.6526757642 -0.1334909884 -3.7358645247  
H -0.0567871366 0.7981939482 0.7370433842  
O -2.3977269411 2.9322075363 -2.1875376392  
C -0.3936898974 2.423381157 -0.6498638602  
H 0.2128901536 3.1465107782 -1.2136477512  
C -1.5489398666 3.1444824142 0.0543358372  
C -2.5950660959 3.4801924653 -1.0319123978  
O -3.5824473502 4.162591038 -0.7806840216  
C -2.2581054371 2.3053717515 1.1412151682  
H -1.5127444578 2.027497246 1.905714844  
H -2.9700854556 2.9784554393 1.6432102455  
C -1.0611850017 4.4482143832 0.7289449083  
H -1.9507854944 4.9229429033 1.1724168712  
H -0.3897290994 4.1771350609 1.5619433351  
C -0.3701179531 5.4577398942 -0.1806931108  
H -0.9856983597 5.6855710959 -1.0650784928  
H -0.202529427 6.4022011212 0.3576128534  
H 0.6131483584 5.1064365426 -0.527168703  
C -3.0170032372 1.0661742875 0.6807592165  
H -2.375864727 0.3348303717 0.1673564263  
H -3.4895218431 0.5619199563 1.5367633116  
H -3.8187480686 1.3355229514 -0.0237756634  
C 1.7338159515 1.9636400163 0.7300229823  
C 2.6755031231 2.7408504213 0.0438896792  
C 1.9254466514 1.7389675248 2.0966194169  
C 3.7781311672 3.275772195 0.7055393153  
H 2.545468194 2.9383616665 -1.0238249451  
C 3.0256591451 2.2760230856 2.7642492718  
H 1.1990517161 1.1349432348 2.6474413396  
C 3.9561336172 3.0463505076 2.0699375085  
H 4.5022693748 3.8784808554 0.1529008092  
H 3.156114818 2.090195605 3.8326955452  
H 4.8190342485 3.4678430114 2.5899398559

Pd -1.1664779435 1.2440482105 -2.1115358245  
H 1.5713697337 0.929475304 -1.8808696584  
C 0.0385945545 -0.5413783723 -1.567092006  
H -0.5937614083 -0.9919673564 -0.7935539785  
C 0.3877222005 -1.4494905949 -2.6851245125  
C -0.0178270996 -2.7863406269 -2.619704234  
C 1.1173697955 -1.0249645167 -3.8038165594  
C 0.3114933929 -3.6838775082 -3.6328926668  
H -0.60716357 -3.1255574304 -1.7643294035  
C 1.446781218 -1.9187940814 -4.8159707769  
H 1.4030143514 0.0247330007 -3.9020440563  
C 1.0482164805 -3.2539289163 -4.7336544244  
H -0.0162886441 -4.7234025367 -3.5638730581  
H 2.0082637528 -1.5681930796 -5.6846596632  
H 1.3028125407 -3.9533326492 -5.5329023679  
Cs -5.0797964598 2.3340892038 -2.9887817469

TransPath\_5-NoCsBr\_TS\_HeckAdd\_Beta\_2373

C 0.4582442964 2.6473587972 -2.5828916398  
C -0.7715748531 0.6137768671 -0.5195486866  
Pd -0.4032137569 0.8837501279 -2.5894378962  
C -1.2855952179 -1.6495874597 -1.5263674445  
H -0.0863007203 1.2198801673 0.0854328417  
C -0.6735292348 -0.8891909703 -0.3063326887  
C -1.9086470499 1.2433892696 -1.0558239885  
H -2.697203305 0.588602292 -1.4436540383  
O -1.7916894957 -2.7412937661 -1.3729296615  
O -1.1523504183 -1.038948783 -2.6636829033  
C 0.8307627976 -1.2651169279 -0.2216022042  
H 1.2890974233 -0.6477008473 0.5719414119  
H 1.3156128697 -0.9565364393 -1.1642983444  
C -1.393373258 -1.2771790416 1.0016721939  
H -1.339928246 -2.3732944243 1.0619160838  
H -0.8210153797 -0.8738262227 1.8556703831  
C -2.8563388124 -0.8636123093 1.1090448846  
H -3.4319944312 -1.2486609854 0.2541639269  
H -3.3029357053 -1.28393871 2.0218504292  
H -2.9876819047 0.228862062 1.158265837  
C 1.1367229515 -2.7359461865 0.0370498955  
H 0.6357508616 -3.3842244566 -0.6955207258  
H 2.2203915325 -2.9124420881 -0.0267772897  
H 0.8105420139 -3.0509121265 1.0387903835  
C -2.3374441866 2.6366921588 -0.8360289069  
C -3.4755977489 3.0918619839 -1.515711492  
C -1.6505114902 3.5272076898 0.0014263686  
C -3.9089461645 4.4088517211 -1.3782205639

H -4.0196954702 2.4042704952 -2.1683420433  
C -2.0825975535 4.8405643901 0.1404794856  
H -0.7603923896 3.198129342 0.5396483425  
C -3.2108353863 5.2866247246 -0.5512022022  
H -4.7953072143 4.7485396568 -1.9175835402  
H -1.532986959 5.5250838208 0.7891740712  
H -3.5460804957 6.3200490044 -0.440833421  
H 1.5492415949 2.5907827439 -2.4249946901  
C -0.13733816 3.8153974051 -2.8592913317  
H -1.2334224976 3.8437770014 -2.9161675453  
C 0.5061386431 5.1305547271 -3.0473237955  
C 1.883738767 5.2845754678 -3.2672443837  
C -0.2916261113 6.283038032 -2.9884217354  
C 2.4439629067 6.550163337 -3.4073580937  
H 2.5230591432 4.4021866816 -3.3427461205  
C 0.2686135152 7.5508343089 -3.1273337914  
H -1.366624636 6.17555221 -2.8196924921  
C 1.6396266817 7.6890527355 -3.3357644477  
H 3.5176535865 6.650386911 -3.581334857  
H -0.3695827801 8.435728919 -3.0747065164  
H 2.0817684481 8.6811986938 -3.4491180577

Phtrans\_Beta\_Habst\_preTS

H -0.0021610124 -1.0079211161 -1.3457301398  
C -0.8440552661 -0.7377683832 -0.5474049263  
C -1.3898714138 1.1131450471 0.9853999826  
Br -2.1336973076 -3.4396811016 -3.9935341135  
Pd -0.9764416824 -2.0295709346 -2.4589585448  
C -0.5401883516 0.7948477472 -0.3061158555  
C -2.1723569659 -1.0405987336 -1.2151650108  
H -2.5340475497 -0.1989751215 -1.8117758858  
O -0.797337962 1.1473772314 2.0844545618  
O -2.6266162535 1.1645365676 0.8112758576  
C 0.9730161272 1.0557808357 -0.1318077838  
H 1.0687886927 2.0876629853 0.2342261489  
H 1.4215523525 1.047913617 -1.1430628459  
C -1.0492692097 1.6561573273 -1.4774713544  
H -0.6790298543 1.2328061304 -2.4305468497  
H -2.144096188 1.5962927776 -1.4915700128  
C -0.6837442049 3.1357042276 -1.3958782183  
H 0.3926826703 3.3179632994 -1.5239947287  
H -1.2076136045 3.6956605842 -2.184289931  
H -0.9894852996 3.5611387507 -0.427300703  
C 1.8275468726 0.1740269191 0.7759968465  
H 1.883253938 -0.8706963024 0.4351342292  
H 2.8574491421 0.5621538251 0.7875982629

H 1.4430184379 0.1973725365 1.803653357  
C -3.3283705162 -1.7133821072 -0.5503759069  
C -3.381424423 -3.0739575673 -0.2194058284  
C -4.4386853049 -0.9112978475 -0.2377583611  
C -4.4755740216 -3.6038185606 0.4625804625  
H -2.5777933029 -3.7341944393 -0.540486912  
C -5.5377056642 -1.4411685724 0.4361330734  
H -4.4040450206 0.1512750486 -0.4784424507  
C -5.5549338034 -2.7880409283 0.8034580584  
H -4.4951102528 -4.66880977 0.7036780986  
H -6.388235736 -0.7961341182 0.6691410549  
H -6.419202632 -3.2076128294 1.3237980986  
C -0.5613051814 -1.5439998352 0.6888810081  
H -0.4904320711 -0.9188417764 1.5796577664  
C -0.4572732486 -2.8657022123 0.8459672661  
H -0.4924268944 -3.5447125893 -0.0126836071  
C -0.4462233844 -3.4624785675 2.1972616256  
C 0.1130431205 -2.7899912473 3.2974784401  
C -1.1266615994 -4.6671190452 2.4269186886  
C -0.04427925 -3.2867197217 4.5893090979  
H 0.6802197675 -1.8701114572 3.1337055552  
C -1.284330608 -5.1629282468 3.7200108324  
H -1.5564760164 -5.2085407092 1.5803305672  
C -0.7534141956 -4.469523473 4.8076303741  
H 0.4030659673 -2.752668027 5.4309015679  
H -1.8254666688 -6.0983272511 3.8788721247  
H -0.873268013 -4.8601743891 5.8203481458  
Cs -3.027090154 -0.9179424765 3.0104898173

Phtrans\_Beta\_Habst\_TS

H 0.1695708916 -1.0505242646 -1.6286406998  
C -1.0668983637 -0.663020806 -0.4520866099  
C -1.2702938458 1.1940175376 1.0689048662  
Br 0.0063011774 -3.0770492218 -4.1992386662  
Pd -0.9036820228 -1.7999259761 -2.3904600527  
C -0.5817940336 0.8073847984 -0.3141134087  
C -2.3079067287 -0.9162789023 -1.1044880113  
H -2.7120405923 -0.0718205336 -1.6679150993  
O -0.547451133 1.2518210291 2.082216913  
O -2.5182864401 1.2774062323 1.0403633116  
C 0.9548937856 0.965031759 -0.2951285948  
H 1.1593110465 1.9798557662 0.0733429468  
H 1.2907943807 0.9475470824 -1.3487489189  
C -1.1555448977 1.7202535907 -1.4139636601  
H -0.9035392246 1.2982501492 -2.4042366788  
H -2.2486264816 1.7206336303 -1.3182591517

C -0.6961402641 3.1740280517 -1.3430844565  
H 0.3701334701 3.2955670238 -1.5808073827  
H -1.2631797072 3.7817895764 -2.0632907945  
H -0.8725533757 3.5957540144 -0.3411474393  
C 1.8380749283 0.0059917737 0.4993992877  
H 1.7621856742 -1.0366646326 0.1537733744  
H 2.8901172748 0.3050812215 0.3784873192  
H 1.5946011536 0.0511259118 1.5690211098  
C -3.3931710061 -1.7868877802 -0.5558128006  
C -3.5088696653 -3.1645964282 -0.7597095803  
C -4.3656291534 -1.1352958182 0.2201020109  
C -4.5399481531 -3.8879651116 -0.158162475  
H -2.7893656205 -3.6843755075 -1.3982873656  
C -5.3891919459 -1.8599742103 0.8274403053  
H -4.2671716203 -0.0550000946 0.3645312871  
C -5.4741625237 -3.2425783639 0.6491370533  
H -4.6136138755 -4.9641383528 -0.3294004201  
H -6.1388865617 -1.3387290958 1.4295414762  
H -6.2812475296 -3.8105489513 1.1171456279  
C -0.6901185953 -1.5030103944 0.7172089933  
H -0.3654387799 -0.8931779163 1.5619667502  
C -0.7972714135 -2.8213405888 0.9195796816  
H -1.0803177597 -3.5050387952 0.1167528317  
C -0.6888652476 -3.3728955156 2.2847879039  
C 0.1947525658 -2.8356908024 3.2355876599  
C -1.6037730819 -4.3539700777 2.6979405647  
C 0.1349449497 -3.2396605232 4.5677501131  
H 0.9321976396 -2.0924817841 2.9228249086  
C -1.664773019 -4.7539816163 4.03178717  
H -2.2972787285 -4.7769215266 1.9661892814  
C -0.8024663451 -4.1913747726 4.9739917563  
H 0.8326950735 -2.8140735986 5.2925210633  
H -2.390645 -5.5108441732 4.3376409479  
H -0.8468556161 -4.5083083692 6.0181164101  
Cs -2.7396806584 -0.6449886429 3.3494583413

Phtrans\_Beta\_Habst\_postTS

H -0.3802218913 -1.4862410321 -2.9733272941  
C -1.1940087306 -0.5705549276 -0.3175988825  
C -1.172631837 1.2705096213 1.1937695971  
Br 1.0426160866 -3.8159404339 -2.4421102801  
Pd -0.4139657975 -2.0985766351 -1.6033771066  
C -0.632289967 0.8588395904 -0.2377734799  
C -2.2121096689 -0.9562165207 -1.2049564777  
H -2.4404945309 -0.259646566 -2.0143095862  
O -0.3520622723 1.3782232846 2.1251741297

O -2.4219707416 1.3189371006 1.2994721635  
C 0.9037437272 0.9649224328 -0.3669956473  
H 1.1720256559 1.9835018347 -0.0524691755  
H 1.1387805426 0.8933715496 -1.4436324688  
C -1.2913032246 1.7781000863 -1.2822455464  
H -1.0631794607 1.4006026714 -2.2950360644  
H -2.3790613713 1.7189106759 -1.1381352394  
C -0.8784563605 3.243991197 -1.1878885172  
H 0.1764558321 3.4022997405 -1.4544559547  
H -1.4853694567 3.8538958118 -1.8732377353  
H -1.0338738051 3.6332165166 -0.1696549197  
C 1.8235113693 0.0030152071 0.381422463  
H 1.7004295555 -1.04438912 0.0625028677  
H 2.8698773005 0.2707002992 0.1715440642  
H 1.6704125361 0.0814827776 1.4666434113  
C -3.3758412315 -1.8026025018 -0.7955199451  
C -3.7216510743 -3.0085557205 -1.4092378701  
C -4.1553732234 -1.3211609643 0.2679572629  
C -4.8057888802 -3.7498687148 -0.9361209609  
H -3.1173282771 -3.3846148726 -2.2386956342  
C -5.2373118716 -2.062524551 0.7348763874  
H -3.8766447648 -0.356672285 0.7087871774  
C -5.5590136661 -3.2857014429 0.141276938  
H -5.059349798 -4.6993657197 -1.4123884816  
H -5.8454362569 -1.6803612608 1.5595699534  
H -6.4059792774 -3.8694385259 0.5088050139  
C -0.8563414175 -1.4168754805 0.8444282859  
H -0.1735165404 -0.9255915534 1.5385868556  
C -1.2519307612 -2.6710506516 1.1626949461  
H -1.9794144123 -3.2218528324 0.5633752076  
C -0.8931527142 -3.2762444169 2.4564711137  
C 0.2706475783 -2.9208305759 3.15950352  
C -1.8202769157 -4.128558802 3.077140209  
C 0.4757350936 -3.3720715685 4.460339119  
H 1.0219928713 -2.2905292502 2.677947669  
C -1.614706725 -4.5756713226 4.3811828833  
H -2.7222606867 -4.4207780477 2.532135467  
C -0.4706575558 -4.1909681256 5.0806363635  
H 1.3880417239 -3.0913828913 4.991110346  
H -2.34947759 -5.2327726881 4.8516916266  
H -0.3053257176 -4.5451156807 6.100316386  
Cs -2.3526033988 -0.3133887145 3.75033184

Phtrans\_Gamma\_Habst\_preTS

C 0.0249845917 1.8000701993 0.311608036  
H 0.1523993994 1.4348422421 -0.8261598713

Br -0.6551127602 2.0112553579 -4.1791276697  
Pd -0.7190922757 2.7581806677 -1.72532286  
O -2.0971760268 4.342535078 -1.6026818834  
C -0.7917923496 3.058588816 0.2307180388  
H -0.1652204878 3.9437695357 0.403249785  
C -2.2490908522 3.3633272599 0.612122307  
C -2.7696447256 4.3390016894 -0.4904231603  
O -3.7958788606 4.9763957451 -0.3315257789  
C -3.2555199669 2.1820200196 0.627250941  
H -2.9108528559 1.4234265564 1.3419393789  
H -4.1877849721 2.5923351713 1.0449321048  
C -2.3359321194 4.0482634832 1.9942201085  
H -3.3828702798 4.3683766344 2.1101291565  
H -2.1457573864 3.288716346 2.7721928704  
C -1.4327475364 5.2576180302 2.2101665524  
H -1.559660998 5.9949021048 1.4020441691  
H -1.6877342597 5.7591521079 3.1553390088  
H -0.3664887402 4.9899745974 2.2628901274  
C -3.5953513561 1.5190904307 -0.7031860437  
H -2.706558346 1.174696328 -1.2544545246  
H -4.2454497343 0.6473317109 -0.5386059331  
H -4.14267131 2.2166761155 -1.3568193498  
C -0.5637424033 0.5832038388 0.9969768544  
C -0.6930966787 0.5708746313 2.3908686226  
C -0.9835042837 -0.5299063719 0.2683775177  
C -1.2559259823 -0.5241826811 3.039346631  
H -0.3725958354 1.4391009713 2.9728619412  
C -1.5507799165 -1.6271041007 0.9161489092  
H -0.8804142576 -0.5307681192 -0.8204624576  
C -1.692630367 -1.6257948079 2.3017875474  
H -1.3604566136 -0.516170244 4.1264323833  
H -1.8825781081 -2.4875296812 0.3311971835  
H -2.1389486672 -2.4835186232 2.8093173022  
C 1.4564991503 2.0582936222 0.7234312113  
H 1.645143302 2.0235796798 1.8009855534  
C 2.4376185652 2.3424757923 -0.1391666136  
H 2.1876552892 2.3553022213 -1.208576871  
C 3.8431818002 2.6535876571 0.176001636  
C 4.346233167 2.6945446562 1.4862108496  
C 4.7249078325 2.9241888611 -0.8803833182  
C 5.6826811404 2.9942574875 1.7272221577  
H 3.6869431104 2.4894283245 2.3322168656  
C 6.0638480962 3.2254333992 -0.6406460536  
H 4.3501109938 2.8970366821 -1.9068931853  
C 6.5483194357 3.2613903942 0.6649697781  
H 6.0538895466 3.0203764535 2.7541847889



H 6.7314065413 3.4328117783 -1.479783961  
H 7.5972791822 3.496961152 0.8571051156  
Cs -3.5990148311 4.0370147985 -4.0017748986

Phtrans\_Gamma\_Habst\_TS

C -0.0040089671 1.8617117492 0.3791695841  
H 0.2196802152 1.4031672869 -1.0764293128  
Br -0.7819139736 1.8945650483 -4.0387009478  
Pd -0.6730641581 2.5978325353 -1.613336756  
O -2.0420954106 4.2454889962 -1.6200260096  
C -0.7793818972 3.0847720815 0.3542297738  
H -0.1460116228 3.9751154861 0.4431586595  
C -2.2470581088 3.4210702155 0.6528990152  
C -2.7566873768 4.2877799775 -0.5447517007  
O -3.8248601205 4.8784802532 -0.4661288739  
C -3.2443243168 2.2393703879 0.7790580235  
H -2.8597159586 1.5211536916 1.5146135589  
H -4.1594948149 2.6648032162 1.217816924  
C -2.3471827439 4.2429081273 1.9586203783  
H -3.4004644598 4.5508313925 2.0427632985  
H -2.1397011909 3.5706334533 2.8096726793  
C -1.4712385408 5.488173162 2.048058017  
H -1.6112201739 6.1339715842 1.1671188075  
H -1.7418902016 6.0794478565 2.935170506  
H -0.3996178477 5.2529258996 2.131906549  
C -3.6440994182 1.5087617509 -0.4993605552  
H -2.7804011596 1.1747123493 -1.0938785141  
H -4.2483695687 0.621937047 -0.259159759  
H -4.261126128 2.1628799917 -1.135202173  
C -0.5710438992 0.5758074744 0.9429216948  
C -0.6876487299 0.4663856674 2.3352935726  
C -0.9523051067 -0.505333649 0.1480992428  
C -1.1959826139 -0.6905598393 2.9170831184  
H -0.3988642792 1.3098258206 2.9684881406  
C -1.4647081801 -1.6650983508 0.7301431812  
H -0.8626069772 -0.431717933 -0.9387457218  
C -1.5913206691 -1.7609476027 2.1134157392  
H -1.2900151177 -0.755210377 4.0032142475  
H -1.7658398225 -2.4986898394 0.0921946044  
H -1.9944672151 -2.6686465643 2.5673796791  
C 1.454205041 2.0382782884 0.7203068045  
H 1.6936284425 1.8008845685 1.7622956861  
C 2.4096207792 2.4591447645 -0.115287991  
H 2.1325519869 2.6317929577 -1.1626724011  
C 3.8256051938 2.6998258245 0.2149920423  
C 4.3098471946 2.7410293029 1.5321751105

C 4.736660346 2.9004371224 -0.8323132408  
C 5.659425095 2.9590777061 1.7888146431  
H 3.6221406893 2.6127585286 2.370844185  
C 6.0884277806 3.119551211 -0.576946377  
H 4.375175968 2.8785125358 -1.8636567999  
C 6.555684745 3.1475650286 0.7354190412  
H 6.0154801873 2.9887646753 2.8210508896  
H 6.7799032246 3.2699824642 -1.4088516714  
H 7.6144235242 3.3212890684 0.9394937602  
Cs -3.7927036437 3.8582316068 -3.8239803529

Phtrans\_Gamma\_Habst\_postTS

C -0.0275121992 1.8710963908 0.5377263604  
H 0.3362194154 1.176664564 -1.7052123076  
Br -0.7579113999 1.9723976912 -4.0658718918  
Pd -0.5704450752 2.3885692194 -1.6390223649  
O -1.8844872596 4.1135585759 -1.636009946  
C -0.760644092 3.0501092679 0.4125256279  
H -0.1362175729 3.9490483462 0.374889368  
C -2.2302667747 3.4063466947 0.6279244733  
C -2.657408791 4.2289520056 -0.6169024596  
O -3.713573891 4.8544095976 -0.6247296213  
C -3.2517992593 2.2473572546 0.7579877231  
H -2.9068324462 1.54795759 1.5304616398  
H -4.1736323027 2.7042985577 1.1489938047  
C -2.3615059313 4.2787542291 1.8986799397  
H -3.4058770094 4.6255594445 1.9183283377  
H -2.2198459151 3.6308959458 2.7810464418  
C -1.4426924424 5.492673084 1.987909307  
H -1.516363939 6.1131726849 1.0809594605  
H -1.7297533185 6.1237608003 2.8417501253  
H -0.3866376833 5.2176861909 2.1288119261  
C -3.617459169 1.4813830044 -0.5095293538  
H -2.7387787582 1.0988167853 -1.0495906246  
H -4.2588322149 0.6226359429 -0.2636558237  
H -4.1836243702 2.126139801 -1.1998365283  
C -0.6068169859 0.5861283503 1.0699548053  
C -0.764577982 0.4841706747 2.4601178522  
C -0.9401593864 -0.5131693202 0.2766001614  
C -1.2729782194 -0.6749105109 3.0389515576  
H -0.5015988765 1.3372303975 3.0918011518  
C -1.4532793554 -1.6742990021 0.8551657134  
H -0.8090299634 -0.4507778266 -0.8050569396  
C -1.6256714037 -1.7588426171 2.2345020146  
H -1.3989902208 -0.7303205357 4.1224620667  
H -1.7179353458 -2.5200231653 0.2167947514

H -2.0290436358 -2.6687063745 2.6841214602  
C 1.450582453 1.9701131723 0.748969175  
H 1.7949038288 1.4496762329 1.649980008  
C 2.3353130149 2.6231961671 -0.0158552482  
H 1.9805707278 3.0550069617 -0.9592372086  
C 3.7732377561 2.7883984814 0.2561632141  
C 4.3514256192 2.528698952 1.5092622867  
C 4.6106332415 3.2262963897 -0.7809458741  
C 5.7192534343 2.6839094957 1.7094398191  
H 3.7219706401 2.2134091111 2.3442706569  
C 5.9801594483 3.3836946755 -0.5815409813  
H 4.1760869217 3.4383407312 -1.7613205494  
C 6.5407748262 3.1105139188 0.6646861138  
H 6.1485471848 2.4774893919 2.6924766353  
H 6.6127211402 3.7216625916 -1.4053280132  
H 7.6139031969 3.2348423369 0.8251352452  
Cs -3.7330866589 4.0214636514 -3.7907514881

Phtrans5-endo-trig\_TS

C -0.6527042689 2.3418803762 1.0365099367  
O -1.1270861627 0.6381298459 -0.1648543046  
H -1.3779043236 1.9611195363 1.7496083763  
Pd -1.0011398268 4.9100781251 1.0795877726  
C -1.0905825139 3.1709418777 -0.0278003697  
H -0.277123642 3.3959579482 -0.7275365344  
C -2.2891934683 2.6469943503 -0.8024964726  
C -1.8297026903 1.1677821592 -1.0921338378  
O -2.0874207134 0.6393067803 -2.1721530903  
C -3.6648237402 2.5952938432 -0.0936770898  
H -3.9435670783 3.6297637848 0.1650667489  
H -4.3803981174 2.2753798976 -0.868145107  
C -2.4885775712 3.4273626415 -2.1165012712  
H -3.2673135024 2.8999482632 -2.6865047462  
H -2.8878259997 4.4229279084 -1.8610923733  
C -1.2691587263 3.600232394 -3.0160747184  
H -0.8599233117 2.617282448 -3.299067605  
H -1.5600235359 4.100989408 -3.9510793944  
H -0.4855735262 4.2221103863 -2.5556963468  
C -3.8570786691 1.6861547481 1.1185096238  
H -3.3495145039 2.0632907786 2.016896492  
H -4.9278483442 1.6242299758 1.3647363901  
H -3.4979388295 0.6651647197 0.9251889825  
C 0.7609201467 2.0244424985 1.3219590016  
C 1.8339942507 2.8030859926 0.8583840194  
C 1.0301510094 0.8060728852 1.9631229971  
C 3.1437149015 2.3519481665 1.0127012385

H 1.6468223864 3.7769384387 0.3931108729  
C 2.3394510823 0.3513355387 2.1004372214  
H 0.1952969723 0.1946336201 2.3106217277  
C 3.4008083699 1.1210890723 1.6208149683  
H 3.9693968165 2.9769354217 0.665039842  
H 2.5328810854 -0.6057121414 2.5897664132  
H 4.4289997296 0.7718259071 1.7404096885  
C -2.3116375196 4.3817004383 2.4419050755  
H -3.3655424785 4.5394491145 2.167749616  
C -1.9837972308 4.0326362815 3.6967295814  
H -0.9286760151 3.8500475619 3.9410991395  
C -2.9122502688 3.8675447334 4.8356468217  
C -2.3928973508 3.7759394363 6.1358147228  
C -4.3047646714 3.7810771114 4.6740924998  
C -3.2306923683 3.6196461973 7.2377429449  
H -1.3108521792 3.8352587096 6.2817521781  
C -5.1428120679 3.6238869146 5.7733857666  
H -4.7381451225 3.8248286245 3.6725877003  
C -4.6111563383 3.5447989726 7.0615185999  
H -2.8019173683 3.5556745008 8.2404891781  
H -6.2228236552 3.5565415872 5.6233915307  
H -5.2711251671 3.4202266103 7.9227376305  
Br 0.6249561128 6.1250495565 -0.4143513476  
Cs 1.2447840043 0.6128080527 -1.8810736905

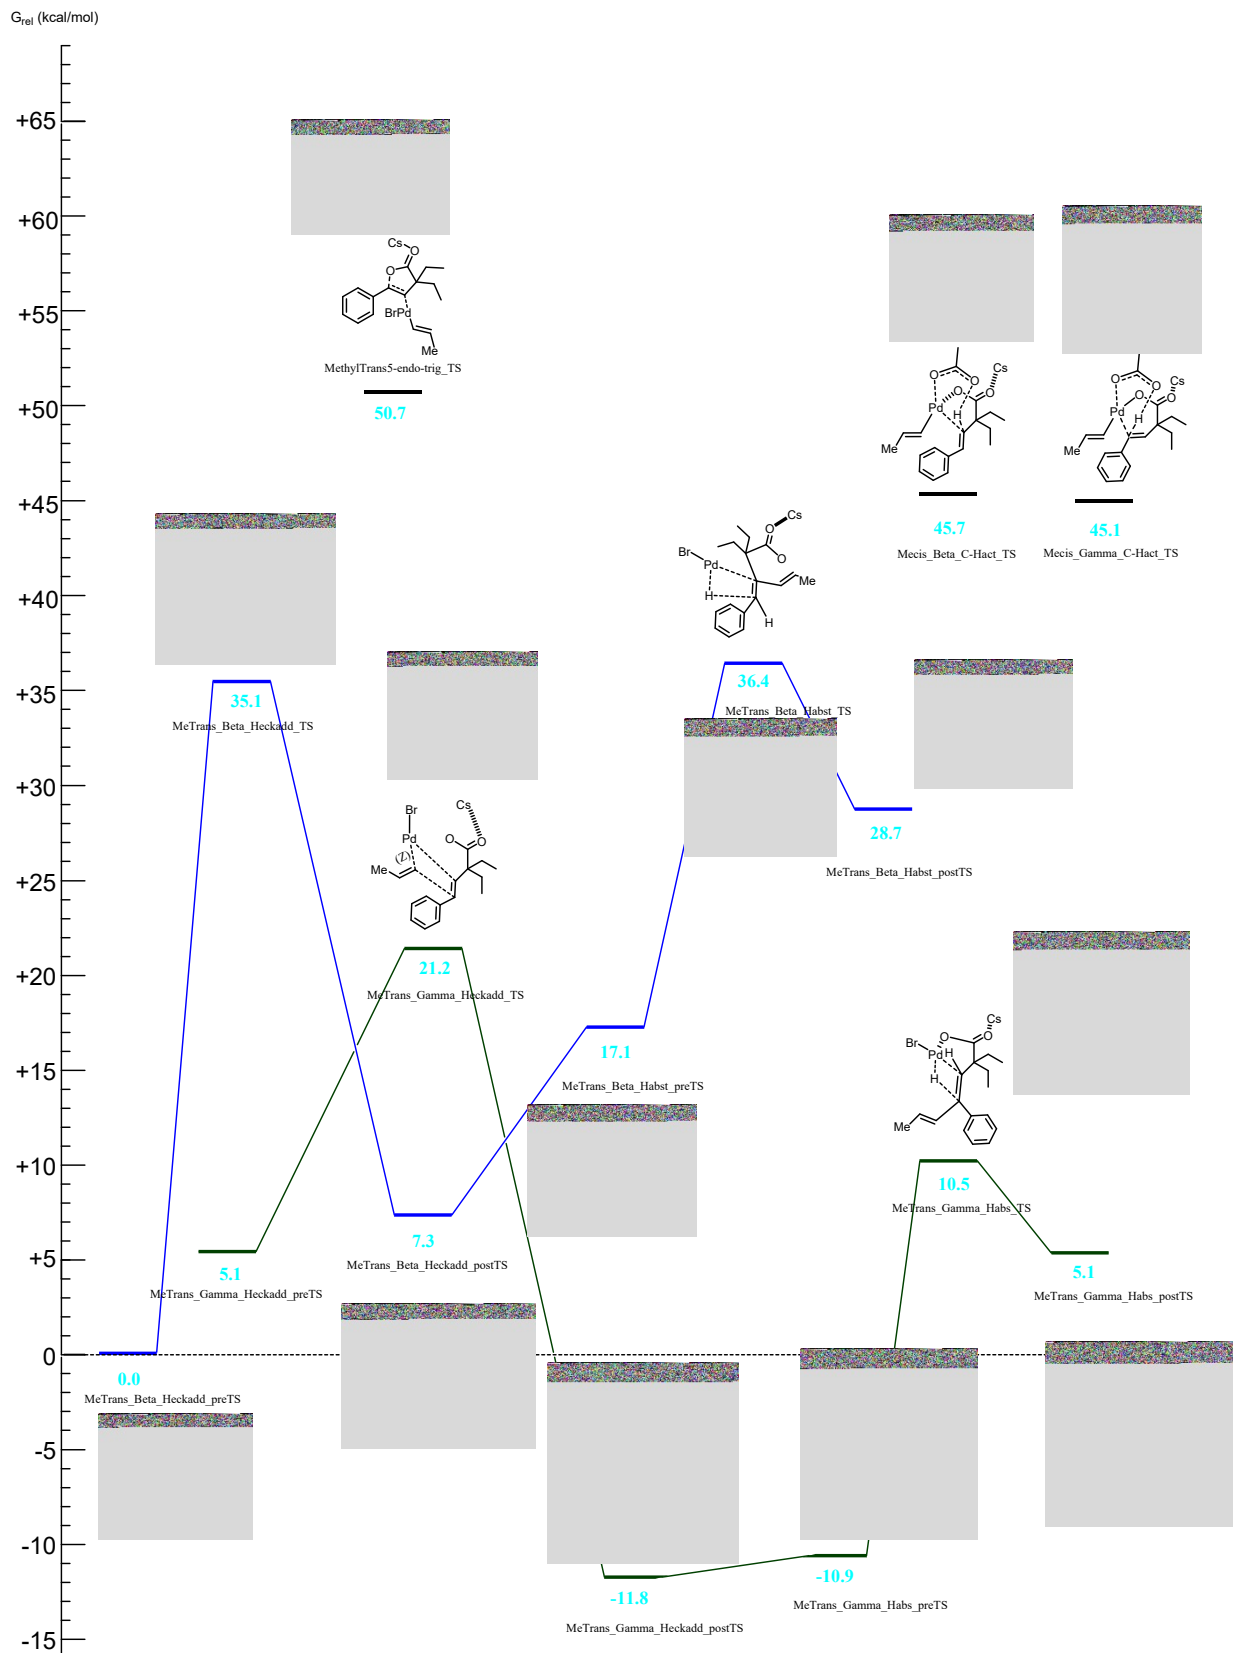

**Fig. S3** Model reaction profile of *trans*-1-bromopropene after oxidation addition.

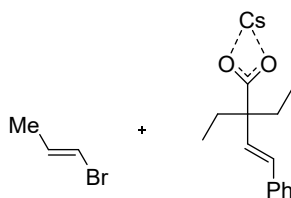

|                              | wB97X-D/BS1                      |                   |          |              |                |            | wB97M-V/BS2                  |                   |
|------------------------------|----------------------------------|-------------------|----------|--------------|----------------|------------|------------------------------|-------------------|
|                              | 1 <sup>st</sup> frequency (cm-1) | Electronic energy | ZPE corr | Thermal corr | Enthalpy corr: | Gibbs corr | Electronic energy in toluene | Electronic energy |
| Metrans_Gamma_C-Hact_TS      | -1202.2                          | -1187.082030      | 0.399551 | 0.443876     | 0.445090       | 0.308052   | -1187.113549                 | -1187.976255      |
| Metrans_Beta_C-Hact_TS       | -1122.5                          | -1187.086090      | 0.400193 | 0.444192     | 0.445406       | 0.310765   | -1187.116763                 | -1187.978907      |
| Metrans_Beta_Heckadd_preTS   | 17.9                             | -3532.831350      | 0.353958 | 0.393865     | 0.395078       | 0.266424   | -3532.863461                 | -3533.575198      |
| Metrans_Beta_Heckadd_TS      | -230.3                           | -3532.778000      | 0.353545 | 0.392615     | 0.393829       | 0.267875   | -3532.806071                 | -3533.524765      |
| Metrans_Beta_Heckadd_postTS  | 23.6                             | -3532.836330      | 0.357104 | 0.395623     | 0.396836       | 0.273542   | -3532.864823                 | -3533.574298      |
| Metrans_Gamma_Heckadd_preTS  | 20.6                             | -3532.820550      | 0.353870 | 0.393995     | 0.395208       | 0.266605   | -3532.852179                 | -3533.567773      |
| Metrans_Gamma_Heckadd_TS     | -340.3                           | -3532.796030      | 0.353392 | 0.392453     | 0.393666       | 0.267530   | -3532.828124                 | -3533.542508      |
| Metrans_Gamma_Heckadd_postTS | 18.6                             | -3532.857240      | 0.356685 | 0.395335     | 0.396548       | 0.271493   | -3532.887943                 | -3533.600538      |
| Metrans_Beta_Habst_preTS     | 14.2                             | -3532.788300      | 0.353244 | 0.392530     | 0.393743       | 0.266839   | -3532.826093                 | -3533.542744      |
| Metrans_Beta_Habst_TS        | -607.4                           | -3532.777320      | 0.351469 | 0.390525     | 0.391739       | 0.266936   | -3532.812915                 | -3533.514263      |
| Metrans_Beta_Habst_postTS    | 22.0                             | -3532.794970      | 0.355593 | 0.394314     | 0.395527       | 0.271399   | -3532.829420                 | -3533.532060      |
| Metrans_Gamma_Habs_preTS     | 22.1                             | -3532.857260      | 0.357179 | 0.395597     | 0.396810       | 0.273069   | -3532.888005                 | -3533.600536      |
| Metrans_Gamma_Habs_TS        | -774.6                           | -3532.815120      | 0.350912 | 0.389843     | 0.391056       | 0.265935   | -3532.847365                 | -3533.557833      |
| Metrans_Gamma_Habs_postTS    | 21.8                             | -3532.824910      | 0.352626 | 0.392207     | 0.393420       | 0.266970   | -3532.855894                 | -3533.568736      |
| MethylTrans5-endo-trig_TS    | -326.2                           | -3532.755410      | 0.353261 | 0.392524     | 0.393738       | 0.266828   | -3532.791189                 | -3533.491111      |

## Cartesian Coordinates

### Metrans\_Gamma\_C-Hact\_TS

C 0.5322070982 1.8507147918 0.1956868463  
 H 0.7926091854 0.4594700958 0.5342837548  
 C 2.3644181294 -0.7268798065 0.3225641952  
 C 3.5510814031 -1.4217483284 0.9222980235  
 O 1.3887102384 -0.445129335 1.0864244262  
 O 2.3963880115 -0.4087813125 -0.8897436582  
 H 4.1316516956 -1.9362905377 0.148353336  
 H 4.1833713102 -0.648623049 1.3853039995  
 H 3.2338717212 -2.1171268256 1.7089639404  
 Pd 0.6731563277 0.5186737078 -1.5667005075  
 O -1.1650192664 1.1530738506 -2.2103340387  
 C -0.6265305329 2.5280730746 0.2976321305  
 H -0.5868450623 3.5229798453 0.7699140526  
 C -2.028912557 2.1424850361 -0.1182125486  
 C -2.17232714 1.3503757132 -1.433888838  
 O -3.2985636682 0.9425361495 -1.7317423518  
 C -2.7049710816 1.3210523743 1.0096403266  
 H -2.6253583003 1.8972390039 1.9469054084  
 H -3.7755136685 1.2497964664 0.7640294598  
 C -2.8518037503 3.440026801 -0.3285955856  
 H -3.8942291139 3.1513614734 -0.529526845

H -2.8498873443 3.9978970416 0.6237660473  
C -2.340294284 4.3314809009 -1.4548365898  
H -2.3968804464 3.817713355 -2.4266274173  
H -2.9391018688 5.2516038196 -1.526968034  
H -1.2902592866 4.6226259184 -1.2981246869  
C -2.1445157544 -0.0784834689 1.2229090519  
H -1.0856969122 -0.0649681185 1.5124771711  
H -2.702064362 -0.6045267361 2.0123647019  
H -2.2317066033 -0.6814811172 0.3039486284  
C 1.7572766453 2.4974508754 0.7574004554  
C 2.9197178448 2.6462668901 -0.0150648572  
C 1.7920421151 2.9392572233 2.088859204  
C 4.0661521211 3.2316399414 0.5193138758  
H 2.9183885156 2.3024959817 -1.0521078453  
C 2.9380799892 3.522273355 2.6259969159  
H 0.9043607286 2.8054451116 2.7125411566  
C 4.0819163686 3.6718018411 1.8427420038  
H 4.9548582208 3.3459576838 -0.1061642609  
H 2.9394438087 3.8563675336 3.6665199645  
H 4.9824115931 4.1262389002 2.2622915685  
C 0.8318402192 -0.4358696206 -3.3209847784  
H 0.4388987465 0.1391651384 -4.1806506523  
C 1.3105957613 -1.6650413683 -3.5580127302  
H 1.7278242251 -2.242148409 -2.7209010586  
Cs -2.2893823381 -1.5406473772 -3.0159574515  
C 1.3728352109 -2.3313929453 -4.9076400444  
H 2.4123736845 -2.5600040367 -5.195309318  
H 0.8338408586 -3.296253527 -4.9159868225  
H 0.942436564 -1.6898209756 -5.6929387241

Mettrans\_Beta\_C-Hact\_TS

H -2.0012737464 1.0683934829 1.5687465509  
C -1.4154637218 0.2304186353 0.5076710576  
C 0.9268964728 -0.6339381936 0.7571448772  
C -2.5409476125 2.9054129751 2.1498391146  
C -3.6198317052 3.8551018596 2.5776791335  
O -2.7632639749 1.6618746859 2.2819479954  
O -1.4975453508 3.3676416673 1.633107173  
H -4.153254192 3.4682520808 3.4543763051  
H -3.2074749705 4.8519394585 2.7701139712  
H -4.3337442679 3.9203579999 1.7409477188  
Pd -0.140168599 1.9765144764 0.9159852377  
C -0.5675104299 -1.0199028254 0.7995758164  
C -2.4172464788 0.2114402304 -0.396629857  
H -2.6875240443 -0.708408835 -0.9306799538  
O 1.2297651456 0.571255193 0.3883700577

O 1.7975279278 -1.4267851916 1.1125395654  
C -0.8780704975 -1.5428584485 2.2268565105  
H -0.3722150871 -2.5112685904 2.3515119813  
H -1.9625684998 -1.7356342078 2.2775753946  
C -0.8205470503 -2.1542443724 -0.2283862282  
H -1.8872618125 -2.4235794977 -0.1535626603  
H -0.6847891054 -1.7296168482 -1.2368440026  
C -0.0004050739 -3.437886395 -0.1231579889  
H -0.1535848853 -3.9522499669 0.8371972052  
H -0.3107415447 -4.1340529912 -0.9177100422  
H 1.0749537512 -3.2471245828 -0.2250948524  
C -0.464574208 -0.6474038635 3.3913211701  
H -0.9333042213 0.3451614168 3.35468617  
H -0.7436219606 -1.1127608995 4.3486261547  
H 0.6288231505 -0.514466689 3.4065456393  
C -3.3068065884 1.3570191426 -0.7093832283  
C -4.6993269477 1.1985213234 -0.6294057756  
C -2.8027781788 2.609588879 -1.0827504116  
C -5.5576319131 2.267115483 -0.8707504431  
H -5.1086738431 0.2243209258 -0.3493198193  
C -3.6604821451 3.6819978031 -1.3272666889  
H -1.7231092484 2.7408510598 -1.1812904429  
C -5.0397754496 3.517511006 -1.2160859931  
H -6.6379153947 2.1258306525 -0.7880882891  
H -3.2430238572 4.6512749958 -1.6090216142  
H -5.712126291 4.3568294729 -1.4088109894  
C 1.257139052 3.4125582102 1.0397175258  
H 1.0308734388 4.2527997625 1.7188617218  
C 2.3756272662 3.4905434867 0.3026504723  
H 2.5909651509 2.6812719908 -0.4121083975  
Cs 3.3591886986 0.899896587 2.3613573491  
C 3.3695861196 4.6219844327 0.3279896067  
H 3.0934262023 5.3836148428 1.0732359023  
H 4.3912240093 4.2700409494 0.5620701927  
H 3.4358873972 5.1188327284 -0.6542199375

Metrans\_Beta\_Heckadd\_preTS

C -1.0802402998 1.8854202472 -2.9933517738  
C -1.5736186771 -0.098327942 -0.7146676273  
Pd -1.4357504393 -0.045856632 -2.8667184607  
C -1.5280797874 -2.5592868657 -1.3403334714  
Br -0.2796385257 -0.4089397223 -5.0401017817  
H -0.9903388699 0.7326096204 -0.3020441097  
C -1.0510714047 -1.479059069 -0.3355082677  
C -2.8510191064 0.1788218837 -1.1868298935  
H -3.5096308395 -0.667884824 -1.4046894774



O -1.4636335188 -3.7505398224 -1.0379469966  
O -1.8513814308 -2.1412197012 -2.5082166085  
C 0.5013971047 -1.4212720354 -0.4467101596  
H 0.8458833943 -0.5774027285 0.1757747094  
H 0.7546611982 -1.1383699094 -1.4840119673  
C -1.473687604 -1.845243771 1.1003284053  
H -1.064805577 -2.844726712 1.3075950523  
H -0.9875275344 -1.1429310371 1.8002139156  
C -2.9767463259 -1.8747327996 1.3496126689  
H -3.4754839182 -2.5585231146 0.6456116645  
H -3.189636605 -2.2353493306 2.3667129746  
H -3.4373057596 -0.8806017286 1.2485580772  
C 1.2751054886 -2.6753906604 -0.0537397783  
H 0.9050597255 -3.5637861372 -0.5852864487  
H 2.3452981732 -2.5442708406 -0.2748816952  
H 1.1866966015 -2.8919435472 1.0206955998  
C -3.5399685329 1.4873152183 -1.1314584681  
C -4.7752702385 1.6163422809 -1.7807217308  
C -3.0109052912 2.606629642 -0.4741215816  
C -5.4580480751 2.8298030499 -1.7877695364  
H -5.1967748241 0.7508244368 -2.2986084962  
C -3.6920895103 3.8197914013 -0.479466598  
H -2.0522358231 2.5341026043 0.0411577014  
C -4.9163353151 3.9378807211 -1.1381669024  
H -6.4168733754 2.9105841434 -2.3043188149  
H -3.2626964165 4.6819037424 0.0354786748  
H -5.4481662505 4.8917642677 -1.1418218153  
H -1.8922036867 2.4472298144 -3.48072721  
C -0.0162527839 2.5187811635 -2.4998001731  
H 0.7891425299 1.9369133217 -2.030978493  
Cs -0.0664283657 -3.8446551457 -3.9654486073  
C 0.182947438 4.0086938494 -2.5402552627  
H -0.6678949892 4.5111559195 -3.0239780603  
H 0.2900608217 4.425518423 -1.5242768516  
H 1.0981082262 4.2758873255 -3.0939503245

Mettrans\_Beta\_Heckadd\_TS

C -0.3453229807 1.8385333489 -2.0882391827  
C -1.5376041751 0.4345607582 -0.9217399877  
Pd -1.8454617957 1.0545899416 -3.1466751455  
C -0.8411034104 -1.8009120387 -1.8143448784  
Br -3.4264818945 0.5814373902 -5.0151865385  
H -1.381800385 1.2214073962 -0.1764069173  
C -0.7920985312 -0.8581872487 -0.5712445387  
C -2.8488722311 0.3766275363 -1.4930175533  
H -3.1848613323 -0.6197305276 -1.7985814164

O -1.7836506538 -2.6194210864 -1.8829336662  
O 0.0316771947 -1.6104609922 -2.6957841631  
C 0.670126108 -0.5830628537 -0.1643295214  
H 0.6841312316 0.2223572814 0.5927231015  
H 1.2067538976 -0.2070567799 -1.0375568698  
C -1.5062761194 -1.4793397693 0.6715615418  
H -1.0818069718 -2.4872058101 0.7842488661  
H -1.1778392281 -0.9060539362 1.5572113494  
C -3.0247874047 -1.6119355046 0.7151543481  
H -3.3842723451 -2.1770153124 -0.1534839949  
H -3.3113886547 -2.1621757902 1.6246076884  
H -3.5414677197 -0.6413086698 0.7559481175  
C 1.431836789 -1.7974709436 0.3582538959  
H 1.3804804631 -2.6258983827 -0.3650490084  
H 2.4941191587 -1.5461110982 0.4966739711  
H 1.0537032359 -2.1605027772 1.324844146  
C -3.9408108146 1.3292767279 -1.1743357721  
C -5.2482361684 0.9883127705 -1.5460939519  
C -3.7280791881 2.5502791334 -0.5182629257  
C -6.3133494377 1.8393032804 -1.2693647072  
H -5.4204482707 0.047603355 -2.0734119429  
C -4.7922107869 3.4035483367 -0.243614856  
H -2.7198378731 2.8473214077 -0.2217068198  
C -6.0892122706 3.0511115328 -0.6172795125  
H -7.3245429319 1.5567961496 -1.5692915772  
H -4.607652771 4.3516666937 0.2659396221  
H -6.92349213 3.7218444267 -0.4013581183  
H -0.5232457387 2.7860373516 -1.5635666685  
C 0.847786225 1.4858975419 -2.5862822245  
H 0.9506058639 0.4650981574 -2.9804219103  
Cs -1.7802873572 -2.5907339957 -4.8236136701  
C 2.0588391246 2.3679783144 -2.5974850073  
H 1.8546637107 3.3583122835 -2.1660259475  
H 2.8744349358 1.8970315136 -2.0244599015  
H 2.4299572485 2.5053152077 -3.625184667

Mettrans\_Beta\_Heckadd\_postTS

C -0.4242308173 1.5766084196 -1.4529982467  
C -1.2669282109 0.5493273751 -0.6873050021  
Pd -1.7039955271 1.5775731501 -3.2146016915  
C -0.756174804 -1.7528655464 -1.6837846778  
Br -3.1855401152 1.3835676566 -5.1894111345  
H -1.5090886052 0.9902451011 0.2918132527  
C -0.6785902056 -0.870584325 -0.3938899913  
C -2.4838588475 0.5789729125 -1.5947751358  
H -2.7412935921 -0.3983312964 -2.0200428731

O -1.8095973893 -2.4017363871 -1.8760452734  
O 0.2038501256 -1.6947277033 -2.4926242825  
C 0.7842444903 -0.7165845397 0.067875948  
H 0.8156915937 0.0226649052 0.8898125481  
H 1.3745586894 -0.2986978787 -0.7570162558  
C -1.4999217786 -1.5099891345 0.7562063133  
H -1.2213201815 -2.5728620872 0.8107151654  
H -1.1517543677 -1.0518255505 1.7004749196  
C -3.0234222213 -1.4223788311 0.7114853865  
H -3.4058231247 -1.8787054867 -0.2096147565  
H -3.4507690621 -1.96379852 1.5694905095  
H -3.3918453073 -0.3869666677 0.7756937844  
C 1.45829997 -2.0096628656 0.5154993113  
H 1.4149266572 -2.7611541976 -0.2869787636  
H 2.5189363249 -1.8294601112 0.7469928947  
H 0.9941248093 -2.4374411189 1.4162679321  
C -3.6683136936 1.4019586949 -1.2619485476  
C -4.9157024882 1.0339994039 -1.7909147239  
C -3.6007313072 2.5395124866 -0.4409624277  
C -6.0581471924 1.7719701251 -1.5064817369  
H -4.9767697051 0.160243577 -2.4431945762  
C -4.7430938034 3.2819818553 -0.1594051697  
H -2.6435204216 2.8533352483 -0.0194096974  
C -5.9751945172 2.9006835437 -0.6907073629  
H -7.0189288775 1.4685606134 -1.9269088367  
H -4.6717327233 4.1649773584 0.4790413043  
H -6.8711135872 3.4845712922 -0.4694125816  
H -0.4053507426 2.5948585503 -1.0434899177  
C 0.3758391811 1.2846433384 -2.5413233355  
H 0.5407968262 0.2228432813 -2.7757929233  
Cs -1.6676775456 -1.9613244241 -4.7980558794  
C 1.3025902923 2.2828368154 -3.1701255859  
H 1.0735796415 3.316279743 -2.8715187529  
H 2.3398455667 2.0562958272 -2.8731352919  
H 1.2657595938 2.2182453972 -4.2686648379

Metrans\_Gamma\_Heckadd\_preTS

C 0.0971423061 2.0723288375 -0.1400312192  
C -0.0887991608 0.9454873246 -2.6629833017  
Br -2.4712793203 2.0831199989 -4.1925375155  
H -0.2626453213 1.1254801402 0.2708958598  
O -2.7152552478 3.918879233 -1.4254560398  
C -0.6863398868 3.1895414087 -0.0152002383  
H -0.2441985563 4.1471588526 -0.3052691345  
C -1.9769336197 3.3407363148 0.7723475495  
C -3.0384587219 3.9259882275 -0.185502061

O -4.1298896377 4.2985842614 0.2417364199  
C -2.5355516892 2.0287921523 1.3700284724  
H -1.7339467819 1.5393865398 1.9481980882  
H -3.3011249722 2.3242665741 2.103171123  
C -1.7508688797 4.3306939817 1.9404003784  
H -2.7281049097 4.4433685645 2.434234089  
H -1.0696459772 3.8610068622 2.6705533664  
C -1.2365211233 5.7153316663 1.5603239161  
H -1.8705435311 6.1757514645 0.7867560349  
H -1.2521132633 6.3790235014 2.4371575267  
H -0.2008700926 5.6982772707 1.1892611596  
C -3.1706895947 1.0293888448 0.4068802011  
H -2.4794051711 0.6766766192 -0.3728094934  
H -3.5367565693 0.1500130806 0.9571372234  
H -4.0365656449 1.4794844738 -0.1024994875  
C 1.533542482 2.0660380352 -0.5052318573  
C 2.1970781915 3.1864040609 -1.0241297109  
C 2.2606310275 0.8830916978 -0.3303321648  
C 3.5475243778 3.1233552491 -1.350395087  
H 1.6503257592 4.1155265645 -1.1980930905  
C 3.6144323028 0.8183135829 -0.6529204441  
H 1.7499121779 -0.0043857027 0.0507168945  
C 4.2635306574 1.9392851261 -1.164810827  
H 4.0455265518 4.0052084353 -1.7591537122  
H 4.1615126926 -0.1160568607 -0.5102869745  
H 5.323130721 1.8916889326 -1.4247854336  
Pd -1.2959113999 2.3920228622 -2.035723308  
H 0.825071801 1.3312883203 -3.1398190238  
C -0.2861756472 -0.365546821 -2.5358841166  
H -1.2129818397 -0.7311652926 -2.0735990745  
Cs -5.315265871 3.4779158158 -2.561145091  
C 0.6806800918 -1.418934676 -3.002083701  
H 1.00497719 -2.0641482371 -2.1676144659  
H 0.2216201706 -2.0787207896 -3.7569700238  
H 1.5789329295 -0.9649224984 -3.4465707053

Metrans\_Gamma\_Heckadd\_TS

C 0.0614578516 1.8829253266 -0.5458174188  
C -0.0850991263 1.1188423267 -2.3861545909  
Br -2.8327506095 1.9101188936 -4.2825888624  
H -0.2755927787 0.9957981862 -0.0043434303  
O -2.9329121205 4.0044218539 -1.4281118894  
C -0.7391494526 3.0609752296 -0.3626924327  
H -0.2136139492 4.004180899 -0.5497292527  
C -1.9045364727 3.2409774963 0.6196008785  
C -3.0871272428 3.8906476764 -0.1528702109

O -4.118045374 4.2001662416 0.4351184751  
C -2.4202026861 1.9304284106 1.2567263807  
H -1.5696255004 1.413050088 1.7322361834  
H -3.0916426955 2.2241074144 2.077345238  
C -1.4861045929 4.1854490057 1.771543591  
H -2.3611775301 4.2775845409 2.4334262163  
H -0.6901277861 3.6902041664 2.3547197529  
C -1.04027891 5.5857679834 1.3638297335  
H -1.8060021919 6.081724008 0.7475277325  
H -0.8801679255 6.2081177609 2.2565322612  
H -0.0962075807 5.5850009184 0.7988690243  
C -3.1824245929 0.9670141847 0.3517033482  
H -2.6109212826 0.6623324698 -0.5375441226  
H -3.4654982256 0.0590795428 0.9046735693  
H -4.1126443845 1.4345461394 -0.005243371  
C 1.5551617289 1.9894060728 -0.5801462395  
C 2.2141751006 3.0705682521 -1.1777113087  
C 2.3196962144 0.9793385155 0.0110303723  
C 3.6039036783 3.144960802 -1.1675553561  
H 1.6350434017 3.8534082079 -1.6738635164  
C 3.7110483505 1.0560019391 0.0288461023  
H 1.8165417574 0.1198220913 0.46218378  
C 4.3581744759 2.1403410809 -0.5601029909  
H 4.1026616459 3.9929376178 -1.6417846738  
H 4.2917577422 0.2615980148 0.5027306093  
H 5.4484802644 2.2008967031 -0.551985688  
Pd -1.5544295057 2.5521344296 -2.1427422824  
H 0.7162093229 1.5097343213 -3.0270375484  
C -0.3327155513 -0.199139652 -2.372419009  
H -1.0884322361 -0.5919864348 -1.6797425798  
Cs -5.5247914308 3.2890600248 -2.4148825623  
C 0.3265114127 -1.2013565057 -3.2649726063  
H 0.8002740049 -2.0066595052 -2.6790076176  
H -0.421351143 -1.6758434772 -3.9208829849  
H 1.0912059255 -0.7336592616 -3.9007487029

Metrans\_Gamma\_Heckadd\_postTS

C 0.2764233559 1.5157075438 -0.8097085159  
C 0.1201201178 1.2003791193 -2.292807676  
Br -3.8494759282 1.1879232869 -3.9211986014  
H -0.0819385351 0.6504706793 -0.2326718226  
O -3.0991490271 3.4851189818 -1.4661409136  
C -0.7620091192 2.6202613173 -0.8135488207  
H -0.321229148 3.5397821534 -1.2251409314  
C -1.6549029901 2.9596352752 0.3860033218  
C -2.9531385072 3.5747225284 -0.1838942308

O -3.8139338863 4.0471678915 0.5511506663  
C -2.0574271696 1.7425118587 1.2492128058  
H -1.1373436015 1.2710389682 1.6344419933  
H -2.5842807689 2.1422442904 2.1293473596  
C -0.9645928068 3.9766270647 1.3250526962  
H -1.6859099901 4.201897 2.1265757258  
H -0.0997410396 3.4801897151 1.7982090661  
C -0.5178853521 5.2864244144 0.6854833531  
H -1.342938153 5.7635825887 0.1335040063  
H -0.1854022617 5.9936609007 1.4595767402  
H 0.3251960186 5.1484315669 -0.0076640724  
C -2.9469096238 0.689224544 0.598886446  
H -2.4901107024 0.2298485042 -0.289699883  
H -3.1807168875 -0.1136979579 1.3138056564  
H -3.9033070442 1.1278463713 0.2750526819  
C 1.6573429027 1.8869617165 -0.3249639873  
C 2.385752579 2.9159672375 -0.9353397818  
C 2.2211558133 1.2367536412 0.7770693907  
C 3.6421183215 3.2819163599 -0.4584956189  
H 1.9647252907 3.4463695749 -1.7939636649  
C 3.4770076062 1.6024760307 1.2606525117  
H 1.6652564926 0.4320386222 1.2663140409  
C 4.1919772757 2.6268361884 0.6435130579  
H 4.1948089423 4.0865236906 -0.9486499636  
H 3.8985424751 1.0831407373 2.1242491663  
H 5.1757722112 2.9153459966 1.0198205407  
Pd -1.9376360426 1.9788122868 -2.3354351413  
H 0.7316843527 1.7871873706 -2.9893225832  
C -0.6835179846 0.1965483275 -2.8000098602  
H -1.1071152126 -0.5289032294 -2.093964961  
Cs -5.9118592926 3.0188424023 -1.6865176306  
C -0.6422126541 -0.2418166447 -4.2369692899  
H 0.0213618718 -1.1167921317 -4.3351899798  
H -1.6429619293 -0.5221135246 -4.5898894965  
H -0.2628719692 0.5579307412 -4.8887678

Metrans\_Beta\_Habst\_preTS

H -0.4574565271 -1.7990576753 -2.710780944  
C -1.3018215145 -0.3487151905 -0.1813671446  
C -0.8880508317 1.6538120804 1.1478386166  
Br 0.8113412954 -4.0410050325 -1.5813405147  
Pd -0.5661768884 -2.0800365186 -1.2206461699  
C -0.5964757488 1.0159498267 -0.2472522148  
C -2.2830707702 -0.754682742 -1.1013931036  
H -2.4023351824 -0.1302636733 -1.9884032817  
O 0.0149273634 2.3140310994 1.7024380901

O -2.0451102075 1.4632980674 1.6037858781  
C 0.9120772818 0.9616867113 -0.5680102574  
H 1.2717760471 1.9972703808 -0.5039703737  
H 1.0183879206 0.6426438151 -1.6190131613  
C -1.294624129 1.9366374049 -1.2793644063  
H -1.1740607444 1.4990658549 -2.2852457548  
H -2.3714050957 1.9364458461 -1.0507637141  
C -0.8019080339 3.381333681 -1.3152553208  
H 0.2256389339 3.4602289357 -1.6982336375  
H -1.4448739386 3.9805769755 -1.9772032247  
H -0.8167956197 3.8389047679 -0.3149603546  
C 1.8326943847 0.1123265155 0.3033391134  
H 1.6588699907 -0.9680810004 0.1876982999  
H 2.8784286473 0.2950806315 0.0142910433  
H 1.730157941 0.3896057893 1.3629580315  
C -3.5193300778 -1.5100591575 -0.7436417506  
C -4.0109029917 -2.5592684008 -1.5281257826  
C -4.2432492561 -1.0968801453 0.3841813105  
C -5.1967031479 -3.202526214 -1.1782796763  
H -3.4422721037 -2.8868185276 -2.4019590963  
C -5.4292803189 -1.7414228314 0.7283476975  
H -3.8501302326 -0.2658823398 0.9783684992  
C -5.9070967248 -2.7976950462 -0.0481516318  
H -5.5649621988 -4.028772282 -1.7902790621  
H -5.9879702821 -1.4151970406 1.6090273406  
H -6.8352249747 -3.3045896487 0.2255594641  
C -0.9543794707 -1.1974053489 0.9742239623  
H -0.1697025561 -0.7900760589 1.6163273208  
C -1.3084729232 -2.4934865586 1.1925197162  
H -2.1455950246 -2.9496283498 0.6564147077  
Cs -1.4583129683 2.6041038432 4.1828799078  
C -0.6384043946 -3.3651638789 2.2041157055  
H -1.3700378532 -3.788564729 2.9099444854  
H -0.1537822246 -4.2100739303 1.6873820962  
H 0.1343661501 -2.8224309055 2.7673892914

Metrans\_Beta\_Habst\_TS

H 0.0054724053 -0.9972903511 -1.6636820291  
C -1.1599329359 -0.4967700822 -0.4395020677  
C -1.3695271054 1.445084027 0.9431793714  
Br -0.2389611449 -3.0122222575 -4.1507831662  
Pd -1.1478841758 -1.673164161 -2.3819696412  
C -0.582613808 0.9427778736 -0.347681195  
C -2.4304421034 -0.6483046606 -1.0690227087  
H -2.7478601003 0.2227965916 -1.6433629014  
O -0.7826963516 1.3799274794 2.0413606411

O -2.5734346419 1.7278269143 0.7583603692  
C 0.9550800152 1.0269737754 -0.2093582909  
H 1.1719604375 2.0598148489 0.0976494043  
H 1.3717489393 0.9226236851 -1.2286255527  
C -0.9973914497 1.8219892519 -1.5462057551  
H -0.6949426256 1.3206768103 -2.483785558  
H -2.0897973642 1.9078903464 -1.5484674251  
C -0.4496163322 3.2466138533 -1.5230681518  
H 0.6377069396 3.2909070223 -1.676855775  
H -0.9170899977 3.8377628487 -2.3242091405  
H -0.6824667173 3.7419966968 -0.5675315892  
C 1.7456515265 0.1095492474 0.7198028698  
H 1.7225009518 -0.9423669526 0.4038195482  
H 2.8001911994 0.4254510104 0.7112552433  
H 1.3772462219 0.1862168072 1.7503612469  
C -3.6073460142 -1.3682661067 -0.5168229931  
C -3.6621260602 -2.7221953791 -0.1560859008  
C -4.7459262131 -0.5734136695 -0.2834020144  
C -4.7932476912 -3.2480309781 0.4701256713  
H -2.8231992478 -3.3777524625 -0.3822935261  
C -5.8752895142 -1.0990443737 0.3389664491  
H -4.7083037168 0.4850431584 -0.5506082175  
C -5.8985517786 -2.4395497696 0.7318277599  
H -4.8143312446 -4.3066404952 0.7382310355  
H -6.7438371552 -0.4592601276 0.5131424998  
H -6.7853889335 -2.8584809485 1.2126387891  
C -0.7886037222 -1.3824265205 0.7047861667  
H -0.6135501563 -0.8248423472 1.6297813405  
C -0.5902402937 -2.7028250954 0.7098916299  
H -0.6340623301 -3.2562388112 -0.2365007471  
Cs -3.3396869064 -0.1661739532 2.8794376372  
C -0.2341001009 -3.4889509983 1.9315137627  
H -0.9679338959 -4.2912957273 2.1139761757  
H 0.7437950299 -3.9811938191 1.80888404  
H -0.1822761596 -2.8500023686 2.8262247218

Metrans\_Beta\_Habst\_postTS

H -0.1211975602 -0.8925287126 -1.3627122253  
C -0.9383213605 -0.5707148316 -0.5592088575  
C -1.4538253448 1.3570388206 0.8751013856  
Br -2.4498500543 -3.0539795194 -4.0909881256  
Pd -1.1669524767 -1.808705256 -2.5112908468  
C -0.5412632528 0.9412761291 -0.334552358  
C -2.2807207836 -0.7766803942 -1.2271135405  
H -2.5974227996 0.0932893445 -1.806299508  
O -0.9601284507 1.3258028557 2.0230847872



O -2.658943518 1.5542491792 0.5995121392  
C 0.9704678284 1.1253181288 -0.0657649648  
H 1.0932677593 2.1697412933 0.2545249503  
H 1.4834797372 1.0485363697 -1.0429600043  
C -0.9082581256 1.7930701395 -1.5680036951  
H -0.5017655979 1.3108929107 -2.4772654921  
H -1.9998182886 1.8078796228 -1.6611793518  
C -0.4542805475 3.2492168564 -1.5113589166  
H 0.6371669194 3.3624855506 -1.574987981  
H -0.8912329088 3.8093768466 -2.3510492591  
H -0.7953920834 3.728661802 -0.5805545323  
C 1.7252291018 0.2582804519 0.9391873779  
H 1.8037593883 -0.7917949795 0.625867832  
H 2.7516708723 0.6438477464 1.0396971588  
H 1.2447566478 0.3038906867 1.9241269963  
C -3.4710865181 -1.3986307204 -0.5831669209  
C -3.5346742422 -2.7177202836 -0.1107665593  
C -4.6089762376 -0.5867337384 -0.4395464779  
C -4.6771740885 -3.1909104109 0.5330195746  
H -2.6960291055 -3.3899982557 -0.2815920824  
C -5.7547502021 -1.0609128937 0.1963811902  
H -4.5650473553 0.4446864757 -0.7920030409  
C -5.7894213862 -2.3635708543 0.6977002256  
H -4.7083957214 -4.2255727373 0.8816197183  
H -6.6272193265 -0.4103084423 0.2929353091  
H -6.6900034328 -2.7432162731 1.1861215063  
C -0.6815283577 -1.4356829199 0.651816882  
H -0.7017205384 -0.8915116243 1.599499308  
C -0.3939192117 -2.7365973734 0.6547800288  
H -0.3107371845 -3.2674650616 -0.3044036474  
Cs -3.4378665125 -0.214679074 2.8301274357  
C -0.1680136968 -3.5483343772 1.8911583225  
H -0.8968148096 -4.3728581245 1.9615977016  
H 0.8313585071 -4.011517495 1.8850975559  
H -0.2497106812 -2.9316938574 2.7991990016

Metrans\_Gamma\_Habs\_preTS

C -0.3939585386 1.4111581931 0.6069169607  
H -0.8287402055 0.7458308543 -0.1535807711  
Br 1.2742695491 4.6037798832 -3.1107940234  
Pd 0.2151311049 3.5475433352 -0.9767042886  
O -1.3055421591 4.9789465686 -0.8571246316  
C -0.9752768198 2.806032515 0.4875249714  
H -0.6799718521 3.4055382364 1.3607669434  
C -2.436707236 3.0950935298 0.1245968586  
C -2.4617196794 4.4808753714 -0.5590943786

O -3.5179551258 5.0266703734 -0.8606054237  
C -3.0638638448 2.0801854997 -0.8578262337  
H -3.0154293767 1.0782662355 -0.3984475288  
H -4.1337851675 2.3298685258 -0.9280319621  
C -3.3300437612 3.1204471562 1.3870683195  
H -4.3444677702 3.3829395817 1.0471689358  
H -3.3807329467 2.0968064051 1.7968046804  
C -2.9139869269 4.0928697534 2.4850158236  
H -2.7733956108 5.1098272226 2.0861086778  
H -3.6921260012 4.1466211522 3.2606065382  
H -1.9824299625 3.7875353162 2.9843185869  
C -2.4916830303 2.031622017 -2.2699073841  
H -1.4191928726 1.7890233535 -2.290868148  
H -3.0218295681 1.2822387896 -2.8763590203  
H -2.6087573806 3.0029543965 -2.7746697479  
C -0.5024041593 0.744235154 1.957153448  
C 0.0320749281 1.3430250746 3.1051184888  
C -1.1799429983 -0.4710651149 2.0952629118  
C -0.1056441069 0.7421849466 4.3540758521  
H 0.5601009182 2.297395333 3.0262905701  
C -1.3238458929 -1.0744021882 3.3442739198  
H -1.6044614469 -0.9513310284 1.2092252774  
C -0.7863413902 -0.4690934833 4.4783054587  
H 0.318806611 1.224419164 5.2374779235  
H -1.8586748954 -2.0229120909 3.430695062  
H -0.8972256532 -0.9391277332 5.4578327294  
C 0.9981967739 1.8229248792 0.1431158359  
H 1.6872355502 2.1889008485 0.9143589086  
C 1.4575080937 1.7062959802 -1.1554741132  
H 0.8508945772 1.1297286032 -1.865312557  
Cs -1.8618879879 6.2432830183 -3.3628375287  
C 2.8981148812 1.8993026857 -1.5377286035  
H 3.4229234238 2.5369968375 -0.8123059502  
H 3.4033522283 0.9199161053 -1.5716963901  
H 2.9818187277 2.3687557432 -2.5262229978

Metrans\_Gamma\_Habs\_TS

C -0.0250990088 1.8950694435 0.4135778601  
H 0.2216062458 1.2849628382 -0.9883964757  
Br -0.7762083075 1.4163134651 -3.9839808976  
Pd -0.698616819 2.3876027913 -1.6502660562  
O -2.1092747377 3.9922258058 -1.8430466587  
C -0.8273399417 3.0878851651 0.2521555545  
H -0.2144372651 3.9967853663 0.2420805152  
C -2.3037662003 3.4223524541 0.5071097267  
C -2.8268102538 4.1407796459 -0.7793606515

O -3.9060803265 4.7165718037 -0.7670656151  
C -3.274880648 2.2391147072 0.7596242222  
H -2.8750064286 1.6120317489 1.5668885795  
H -4.2000795153 2.6877765497 1.1517933434  
C -2.4290198333 4.379110462 1.7150702263  
H -3.4891126578 4.6712352797 1.7616740998  
H -2.2115450128 3.8083976905 2.6349791622  
C -1.5808096251 5.6457832342 1.671163785  
H -1.7309023363 6.1890377319 0.7250664095  
H -1.8681926661 6.323500874 2.4885018468  
H -0.5048407229 5.4440265237 1.7823518674  
C -3.6562267266 1.3682578762 -0.4339133049  
H -2.7840454309 0.9984829233 -0.9941990136  
H -4.2350630759 0.4947690129 -0.1003141668  
H -4.2923054545 1.9358160346 -1.1312778716  
C -0.5667278783 0.6631865891 1.1078984443  
C -0.6830876826 0.6962956054 2.5042694875  
C -0.9259121056 -0.5023176011 0.4303988433  
C -1.1697510674 -0.4037161801 3.2033702859  
H -0.410953952 1.6060083779 3.0463841829  
C -1.4162103057 -1.6052795015 1.1299901075  
H -0.8366228865 -0.5398864591 -0.6583309797  
C -1.5429996775 -1.5594802622 2.5158310972  
H -1.2639670578 -0.3568937351 4.2904402044  
H -1.700386688 -2.506195872 0.5820735005  
H -1.929165676 -2.4227171272 3.0619950289  
C 1.429929681 2.1372710619 0.7365168712  
H 1.6616608094 2.0798346866 1.8072597599  
C 2.4016173186 2.4221546388 -0.1315138233  
H 2.1522295554 2.4496679307 -1.2003908307  
Cs -3.8279567969 3.3171419778 -3.9973779037  
C 3.8236934212 2.706489769 0.2374228612  
H 3.986191347 2.6469921162 1.3233865212  
H 4.5044944573 1.9935355956 -0.2541844305  
H 4.1203860476 3.7121171653 -0.1011622719

Metrans\_Gamma\_Habs\_postTS

C -0.0520603863 1.9162691347 0.5480278404  
H 0.3144620011 1.0207551177 -1.6224167775  
Br -0.8199617995 1.5524922008 -4.0383885766  
Pd -0.6196413629 2.2121236109 -1.6655202483  
O -1.9743493489 3.9002782248 -1.8180635565  
C -0.8114846661 3.0609573628 0.3162524264  
H -0.2057210115 3.9639131493 0.185365135  
C -2.2879494766 3.4056268535 0.5067690527  
C -2.7433264215 4.0928417705 -0.8080870088

O -3.8164461835 4.6867995421 -0.8668990634  
C -3.281675488 2.2428706885 0.7601434764  
H -2.9142291252 1.6306630031 1.5937370156  
H -4.2108238814 2.7150709238 1.1139249343  
C -2.431846166 4.395696362 1.6868002819  
H -3.4845206391 4.7170033562 1.6827413414  
H -2.2668232994 3.8419228971 2.6272594411  
C -1.5443443965 5.6352984872 1.647185584  
H -1.6397680533 6.1603908738 0.6837390847  
H -1.8424707357 6.3407361728 2.4367082027  
H -0.4807563501 5.4020265865 1.8054923933  
C -3.6398971216 1.347784454 -0.4221058091  
H -2.7571982703 0.9386429632 -0.9354934046  
H -4.2539105979 0.4998351279 -0.0855693647  
H -4.2325469424 1.9074249579 -1.1625471381  
C -0.6004012513 0.673550133 1.2003104587  
C -0.7516822321 0.6967163125 2.5947949954  
C -0.9114958945 -0.5019849784 0.5142653775  
C -1.2325114843 -0.414655714 3.2809008007  
H -0.5058623859 1.6099446549 3.1438161469  
C -1.396659679 -1.6156898139 1.2001854822  
H -0.7853854194 -0.5367427272 -0.5692366808  
C -1.5632954187 -1.5760495275 2.5822584695  
H -1.3541372652 -0.3720346987 4.36552538  
H -1.6445027387 -2.5223373614 0.6438931784  
H -1.9451860708 -2.4488809109 3.1162127198  
C 1.4268904019 2.0656985952 0.7444743762  
H 1.7730583401 1.7044205923 1.7217501472  
C 2.3185887354 2.5947806581 -0.0970688506  
H 1.9785124142 2.9011415671 -1.094494723  
Cs -3.850779132 3.5313780168 -3.9198312529  
C 3.771781005 2.7822856319 0.2071076044  
H 4.0280169927 2.4302459171 1.2170644699  
H 4.3971738991 2.237808584 -0.5184793984  
H 4.0535729066 3.8450832477 0.1319900366

MethylTrans5-endo-trig\_TS

C -0.6819270994 2.2529193004 1.0285518715  
O -1.3120398391 0.671732146 -0.2354023237  
H -1.4319893472 1.9139973568 1.7370342994  
Pd -0.7876030858 4.8476922606 1.1966965336  
C -1.0474577764 3.1779885635 0.0166178481  
H -0.2222212341 3.3576710438 -0.6828193924  
C -2.295186996 2.8023118514 -0.7674783356  
C -1.9774584046 1.3027769868 -1.127778908  
O -2.2964083071 0.8449863058 -2.2233239171

C -3.6632580463 2.8467748297 -0.0438990963  
H -3.8392158286 3.8890926813 0.267721684  
H -4.4134365604 2.6319568404 -0.8219494984  
C -2.4341873772 3.6574159908 -2.0422307932  
H -3.2655254197 3.232659598 -2.6237554862  
H -2.7350109423 4.6727531447 -1.7352327438  
C -1.2147203221 3.758905842 -2.9524835317  
H -0.9079009478 2.7578218024 -3.2952293852  
H -1.4665004025 4.3359000635 -3.8543444695  
H -0.3683919772 4.2758807048 -2.4736528217  
C -3.9276531744 1.9049087782 1.1288369695  
H -3.3803323674 2.1993613196 2.0347715528  
H -4.9977188077 1.9294548657 1.3843551017  
H -3.6638911121 0.8651478004 0.887377363  
C 0.7000564379 1.795152041 1.2828638831  
C 1.8364569988 2.5029296909 0.858612718  
C 0.8634248593 0.5216531115 1.8481700908  
C 3.1020906665 1.9306455427 0.9767599027  
H 1.7350163457 3.5145744365 0.4508694085  
C 2.1280666176 -0.0530652302 1.9494419725  
H -0.0212517501 -0.0349888587 2.1629293842  
C 3.2520860728 0.6482886444 1.5091655558  
H 3.9783176594 2.5009461989 0.660101003  
H 2.2377466523 -1.051096778 2.3793136514  
H 4.2460121342 0.2041788399 1.6005948734  
C -2.1193368544 4.4005052127 2.5689611281  
H -3.1594489242 4.6853939442 2.3390847785  
C -1.8037539153 3.9919122131 3.8049816557  
H -0.7799070915 3.6504172721 4.0150869815  
Br 0.9367259398 5.9707530721 -0.2736375518  
Cs 1.0354702372 0.550390169 -1.9931093053  
C -2.7524707849 3.9596767859 4.9707893281  
H -3.7560483462 4.3052634375 4.6820036039  
H -2.8438018539 2.9384956079 5.3771633322  
H -2.3931807665 4.5989230118 5.793603047

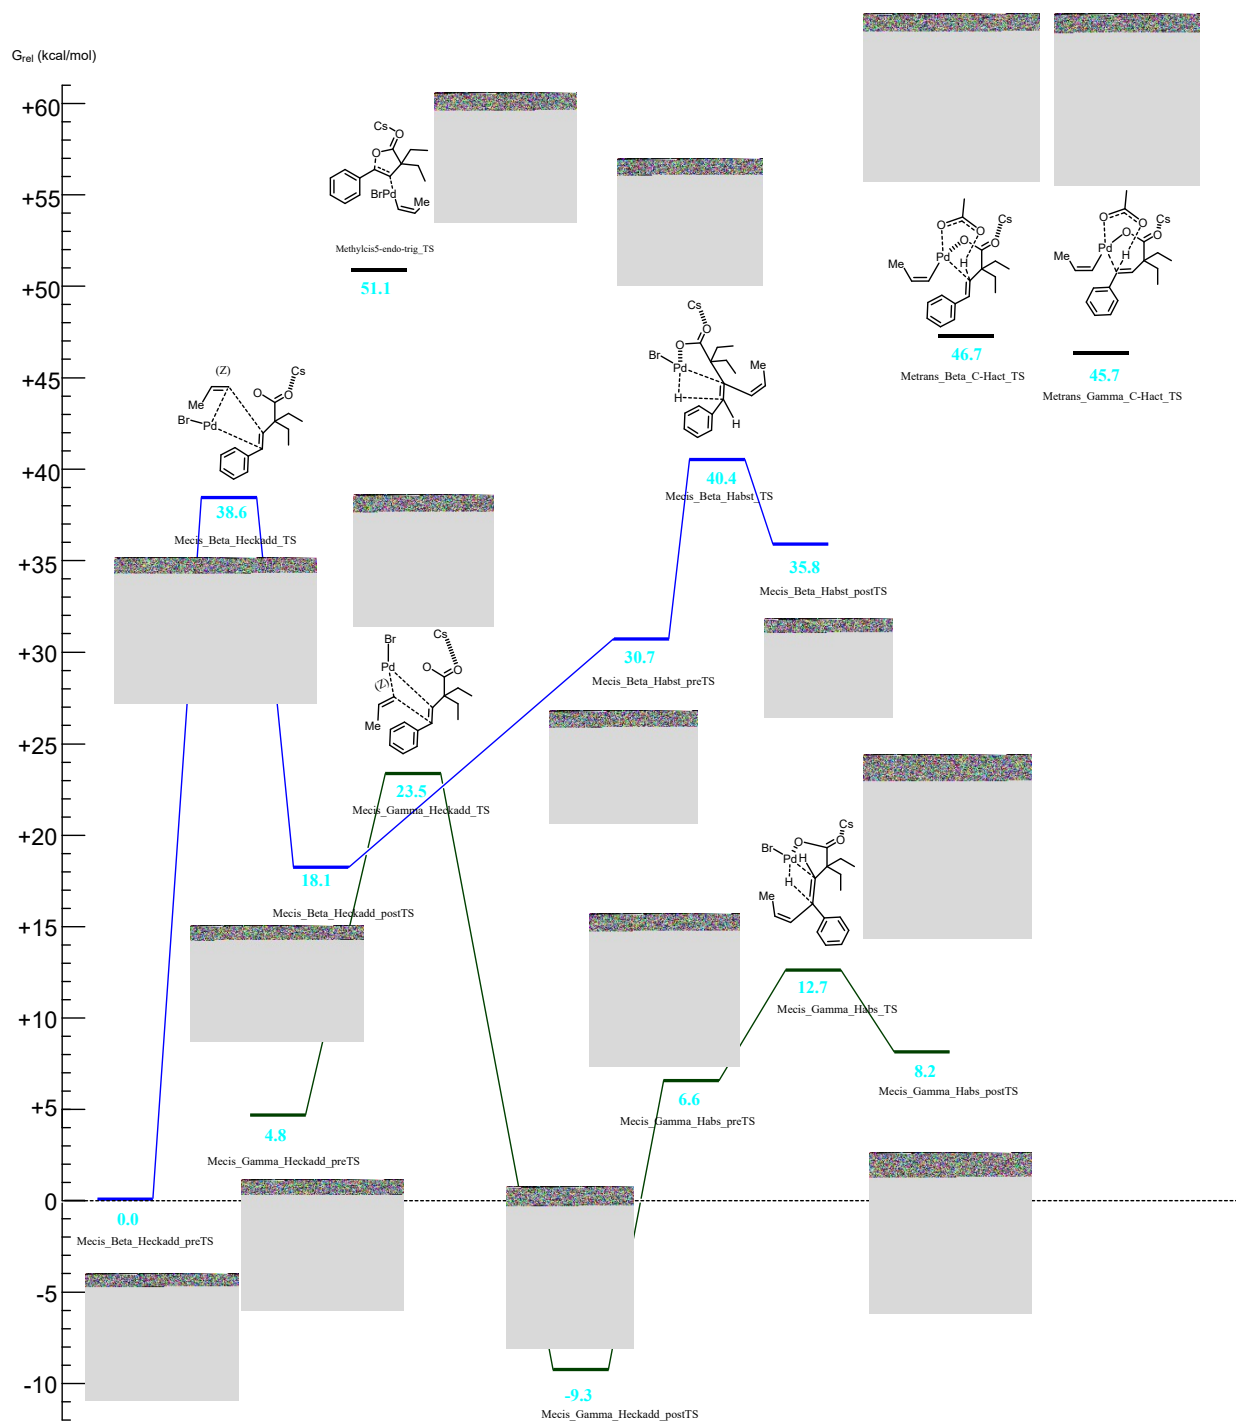

**Fig. S4** Model reaction profile of *cis*-1-bromopropene after oxidation addition.

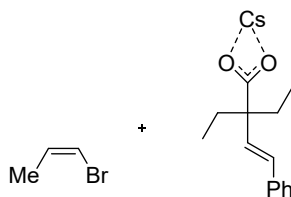

|                            | wB97X-D/BS1                                   |                   |          |              |                |            | wB97M-V/BS2                  |                   |
|----------------------------|-----------------------------------------------|-------------------|----------|--------------|----------------|------------|------------------------------|-------------------|
|                            | 1 <sup>st</sup> frequency (cm <sup>-1</sup> ) | Electronic energy | ZPE corr | Thermal corr | Enthalpy corr: | Gibbs corr | Electronic energy in toluene | Electronic energy |
| Mecis_Gamma_C-Hact_TS      | -1215.4                                       | -1187.083690      | 0.399927 | 0.443977     | 0.445190       | 0.309308   | -1187.114778                 | -1187.977221      |
| Mecis_Beta_C-Hact_TS       | -1143.4                                       | -1187.087370      | 0.400628 | 0.444407     | 0.445620       | 0.312008   | -1187.117607                 | -1187.979081      |
| Mecis_Beta_Heckadd_preTS   | 20.2                                          | -3532.833130      | 0.354088 | 0.393845     | 0.395058       | 0.267053   | -3532.864999                 | -3533.576233      |
| Mecis_Beta_Heckadd_TS      | -296.5                                        | -3532.776930      | 0.354499 | 0.393078     | 0.394291       | 0.270386   | -3532.804902                 | -3533.522003      |
| Mecis_Beta_Heckadd_postTS  | 23.2                                          | -3532.823030      | 0.357626 | 0.395846     | 0.397060       | 0.275096   | -3532.851580                 | -3533.558673      |
| Mecis_Gamma_Heckadd_preTS  | 18.2                                          | -3532.821580      | 0.353874 | 0.393928     | 0.395141       | 0.266365   | -3532.853123                 | -3533.568230      |
| Mecis_Gamma_Heckadd_TS     | -375.4                                        | -3532.795900      | 0.354029 | 0.392678     | 0.393892       | 0.269210   | -3532.827848                 | -3533.540849      |
| Mecis_Gamma_Heckadd_postTS | 16.4                                          | -3532.856750      | 0.357581 | 0.395756     | 0.396969       | 0.273807   | -3532.887870                 | -3533.598511      |
| Mecis_Beta_Habst_preTS     | 27.0                                          | -3532.790780      | 0.355988 | 0.394764     | 0.395978       | 0.271465   | -3532.825689                 | -3533.528679      |
| Mecis_Beta_Habst_TS        | -576.9                                        | -3532.771560      | 0.351650 | 0.390585     | 0.391798       | 0.267338   | -3532.806974                 | -3533.508638      |
| Mecis_Beta_Habst_postTS    | 26.5                                          | -3532.782360      | 0.353879 | 0.392744     | 0.393957       | 0.271144   | -3532.817391                 | -3533.520100      |
| Mecis_Gamma_Habs_preTS     | 26.1                                          | -3532.832430      | 0.356597 | 0.395045     | 0.396258       | 0.273504   | -3532.863028                 | -3533.573373      |
| Mecis_Gamma_Habs_TS        | -795.2                                        | -3532.812890      | 0.350884 | 0.389779     | 0.390993       | 0.265475   | -3532.844954                 | -3533.554159      |
| Mecis_Gamma_Habs_postTS    | 22.7                                          | -3532.824040      | 0.353483 | 0.392592     | 0.393805       | 0.269279   | -3532.854891                 | -3533.566419      |
| Methylcis5-endo-trig_TS    | -328.1                                        | -3532.757150      | 0.353393 | 0.392415     | 0.393628       | 0.268305   | -3532.792568                 | -3533.492491      |

## Cartesian Coordinates

### Mecis\_Gamma\_C-Hact\_TS

C 0.48924622 1.8508732304 0.1855775817  
 H 0.7302877362 0.4568566 0.5144018205  
 C 2.2966260952 -0.7328416058 0.2881169493  
 C 3.4863792879 -1.4314484643 0.876500217  
 O 1.3219797942 -0.4593531213 1.0566941841  
 O 2.322843026 -0.4047593904 -0.9213248359  
 H 4.0564891523 -1.9485206325 0.0964610902  
 H 4.1267710476 -0.6607347278 1.3323929342  
 H 3.174325583 -2.1257899405 1.6660592997  
 Pd 0.5923882726 0.5221428626 -1.5831662395  
 O -1.2293874889 1.2044544138 -2.217654653  
 C -0.6554129664 2.5492857025 0.3012430661  
 H -0.591209686 3.5392673804 0.7807365887  
 C -2.0671815889 2.1965940295 -0.1118877854  
 C -2.2345554464 1.4555340448 -1.4545664495  
 O -3.3795934724 1.1300809973 -1.7809238555  
 C -2.7443385095 1.334545103 0.9857818582  
 H -2.6452729075 1.8658505188 1.947292933  
 H -3.8184986874 1.2937285036 0.7485233167  
 C -2.8764346401 3.5107058652 -0.2578117271  
 H -3.9249658938 3.2431326694 -0.4543860483  
 H -2.8525068267 4.031313288 0.7150811998  
 C -2.3714875829 4.4380567217 -1.3576790174

H -2.4528751408 3.9617916275 -2.3467910797  
H -2.9592538975 5.367646681 -1.3853730097  
H -1.3153486467 4.7107845422 -1.2088202769  
C -2.2087219908 -0.0835239123 1.1298325932  
H -1.1498803201 -0.1040065416 1.4179517392  
H -2.7749378432 -0.6362737026 1.8944718103  
H -2.3064229685 -0.6414474051 0.1836562334  
C 1.7301241258 2.4734305557 0.7401615243  
C 2.8807884958 2.6280961504 -0.0482939708  
C 1.790928367 2.8858314703 2.0799984061  
C 4.0418064245 3.1904341852 0.4793191647  
H 2.8584388774 2.3069089841 -1.092247398  
C 2.9515611241 3.4457160386 2.6104433094  
H 0.912001355 2.7475029773 2.7149654325  
C 4.0838331199 3.60105108 1.8116189499  
H 4.9211762935 3.3097664897 -0.1582747652  
H 2.9733766743 3.7572395183 3.6577044473  
H 4.9956889569 4.0373168436 2.2258801467  
C 0.7832088425 -0.4175307631 -3.3500632437  
H 0.8068627688 0.2725715327 -4.2093005493  
C 0.9192570914 -1.7257423645 -3.6117530197  
H 1.0821608514 -2.0493824202 -4.652376876  
Cs -2.5097609731 -1.3340388553 -3.1683653451  
C 0.9111197627 -2.8358583177 -2.5941651991  
H 0.2173970697 -3.6499640193 -2.8759068668  
H 1.9057344384 -3.3020873928 -2.5017014843  
H 0.6285756236 -2.4599700303 -1.5986861007

Mecis Beta C-Hact TS

H -1.9801334685 1.0618176883 1.5204195991  
C -1.4353871514 0.2029405199 0.4655632616  
C 0.8982210293 -0.6918437284 0.6146027625  
C -2.4811702202 2.9127691668 2.0945053654  
C -3.5331963331 3.883302884 2.5425703234  
O -2.7154978525 1.6746318379 2.2495701799  
O -1.4482134703 3.3550405115 1.5400487042  
H -4.0464361534 3.5140646712 3.4386699975  
H -3.1005715377 4.875747771 2.7117538976  
H -4.2700070597 3.9505440093 1.7261226907  
Pd -0.1251788453 1.9443184768 0.7978440147  
C -0.5948679043 -1.0489173399 0.770841503  
C -2.458025368 0.1762753491 -0.4149301565  
H -2.7535900877 -0.7523949191 -0.9193302927  
O 1.1910278036 0.5074961924 0.2179656459  
O 1.7829179391 -1.4935474547 0.907656902  
C -0.8134011101 -1.4870025515 2.2436985854  
H -0.3125642798 -2.455593573 2.3851116776  
H -1.8939288352 -1.6589351457 2.3811781142  
C -0.9361822861 -2.2306831287 -0.1742082781  
H -2.0087540095 -2.4487521441 -0.0395497292  
H -0.82789941 -1.872964812 -1.2116498127  
C -0.1651589448 -3.5402139291 -0.0254826809  
H -0.3115366766 -3.9983032598 0.9640570253  
H -0.5271590825 -4.2626675466 -0.7732953499



H 0.9130905146 -3.3984660077 -0.1670666568  
C -0.3047455894 -0.5381422506 3.3253316287  
H -0.7820371636 0.4500703332 3.2850739059  
H -0.4962624323 -0.9606239552 4.3231701493  
H 0.7847955152 -0.3979423509 3.238365816  
C -3.3426631295 1.3244440516 -0.7306359655  
C -4.7349087895 1.1750888522 -0.6297528619  
C -2.8367596274 2.5701825414 -1.123625207  
C -5.5901793579 2.2466066303 -0.8684858577  
H -5.1460874707 0.2060474246 -0.3347957168  
C -3.6913772647 3.6455816928 -1.3653915849  
H -1.7579289296 2.6944379767 -1.2388234122  
C -5.0698483785 3.4906483306 -1.232404803  
H -6.6699553142 2.1126827915 -0.7689209528  
H -3.2721557825 4.6096468888 -1.661967798  
H -5.7398463027 4.3323744736 -1.4227411532  
C 1.2784506429 3.3848799209 0.9356999813  
H 1.112598482 4.0780714076 1.7761869075  
C 2.3002920064 3.6850896095 0.1163624306  
H 2.9028328849 4.5815474491 0.3376956606  
Cs 3.5456660165 0.8670360814 1.8463735831  
C 2.6884381567 2.9588242626 -1.144062595  
H 3.7571727935 2.671488738 -1.1428662748  
H 2.0832426074 2.0536447873 -1.2881143629  
H 2.5571531429 3.6108064081 -2.0234447496

Mecis Beta Heckadd preTS

C -1.7271542387 1.7658125508 -3.4159038001  
C -1.6904896043 -0.0235223335 -0.9067319694  
Pd -1.8712863186 -0.1676656001 -3.0517549195  
C -1.5777220419 -2.5281481301 -1.3062395506  
Br -0.972451065 -0.6745799074 -5.3159368426  
H -1.115269935 0.8742909967 -0.6531482184  
C -1.0338852482 -1.3326643177 -0.4826274186  
C -3.0404753343 0.1272714812 -1.2026808901  
H -3.6547191197 -0.7777532563 -1.2445061298  
O -1.4036106848 -3.6791945591 -0.9065656229  
O -2.0721946061 -2.243009983 -2.4536493479  
C 0.4820869099 -1.2264322692 -0.8205686321  
H 0.859983582 -0.2898740056 -0.3758222514  
H 0.5728249756 -1.0842339958 -1.9117379491  
C -1.2310976002 -1.5702862701 1.0272170488  
H -0.7458286685 -2.5281015908 1.2640446652  
H -0.6877748709 -0.7845057986 1.581217296  
C -2.6799908268 -1.6325907705 1.4952205582  
H -3.2375302814 -2.4003409086 0.9369235885  
H -2.7268210349 -1.900433175 2.5610029329  
H -3.2014740232 -0.6715774785 1.372497776  
C 1.3735917506 -2.3837469232 -0.3822497364  
H 0.974368161 -3.350747879 -0.7207652536  
H 2.3897679442 -2.2519879655 -0.7843052411  
H 1.4605981385 -2.4426807546 0.7122518488  
C -3.8183244429 1.3839813328 -1.1415836271  
C -5.1439237346 1.3678728722 -1.5964565169

C -3.2927710641 2.5892775717 -0.6568422524  
C -5.921122664 2.5228828837 -1.5805331864  
H -5.5635290621 0.4336727421 -1.9788168254  
C -4.0687387201 3.7440214656 -0.6380901561  
H -2.2640993536 2.6300208221 -0.2959446299  
C -5.3843095303 3.7170139452 -1.1017106588  
H -6.9503751419 2.4902640977 -1.9442028668  
H -3.6420826206 4.6748308673 -0.2582178675  
H -5.9903853478 4.6254144693 -1.0868345651  
H -2.6850158922 2.2000827001 -3.735759635  
C -0.6558630061 2.5457602797 -3.2689933583  
H -0.7804460234 3.6180297798 -3.4765905802  
Cs -0.3460084157 -3.9575544731 -3.9660791814  
C 0.7232667777 2.1164055296 -2.8621444795  
H 1.019706797 2.5661675987 -1.8984636656  
H 0.788552659 1.0235748472 -2.7694399669  
H 1.4701638267 2.436612512 -3.6063449214

#### Mecis Beta Heckadd TS

C -0.5656867248 1.8084430163 -2.2093412374  
C -1.5584887267 0.3965688619 -1.0441056451  
Pd -1.9910913486 0.8428233592 -3.2881977284  
C -1.0357826354 -1.9623179975 -1.756384009  
Br -3.549220089 0.2554046168 -5.1270180479  
H -1.3993384223 1.180328284 -0.2972621089  
C -0.8089864618 -0.8833920802 -0.6530273356  
C -2.9057281597 0.306643668 -1.5500144823  
H -3.2558833607 -0.7115410326 -1.7534512167  
O -2.0713976357 -2.6611475418 -1.6759569817  
O -0.2017271652 -2.0046437091 -2.6911612696  
C 0.6927868602 -0.6068521204 -0.455238805  
H 0.8061748953 0.2666543511 0.2120735835  
H 1.1203486007 -0.3268196844 -1.419316241  
C -1.3920704817 -1.3339674258 0.7242626394  
H -1.0022558611 -2.3469296607 0.9018634375  
H -0.9356217146 -0.6901373065 1.49764191  
C -2.9009263441 -1.3668476238 0.9456498529  
H -3.3845631774 -1.9932439196 0.1865446264  
H -3.1131658304 -1.797604746 1.9362275062  
H -3.3583044323 -0.3659301759 0.9299598639  
C 1.4984874424 -1.7816397828 0.0901004857  
H 1.3638383152 -2.6682770948 -0.5474448375  
H 2.5710345335 -1.5357353892 0.0931603898  
H 1.2222309823 -2.0490870265 1.1205718135  
C -3.9788253029 1.2806995359 -1.2361585304  
C -5.2836524029 0.9841114424 -1.6566374196  
C -3.7579814884 2.476644117 -0.5381256898  
C -6.3340831336 1.8563601749 -1.39426709  
H -5.4617857526 0.0630987335 -2.2158925501  
C -4.8085885358 3.3513533705 -0.2758237014  
H -2.7569291866 2.73379908 -0.1859088792  
C -6.1000290731 3.0453432965 -0.7034608907  
H -7.3416936722 1.6092033752 -1.734655384  
H -4.6173164876 4.2777446127 0.2699015692

H -6.9232926314 3.7324577242 -0.4969560754  
H -0.8774077731 2.70877587 -1.6703783432  
C 0.6430742965 1.7821953575 -2.7966834368  
H 1.216192026 2.7171137166 -2.7167009692  
Cs -2.1965757101 -3.0067425648 -4.6018539766  
C 1.2821111886 0.6936331738 -3.6035661774  
H 2.3358048884 0.5686411843 -3.3079494668  
H 0.7661715235 -0.2725175408 -3.4833022932  
H 1.2882820123 0.9789627102 -4.6695826038

Mecis\_Beta\_Heckadd\_postTS

C -0.6276312929 1.581145717 -1.8518708309  
C -1.3323163633 0.5490476077 -0.9590098463  
Pd -2.0373534301 1.3941621013 -3.5192174573  
C -0.9485038833 -1.910018023 -1.6889619233  
Br -3.669030469 0.8597816455 -5.2946884167  
H -1.4853458381 1.0607306487 0.0036025992  
C -0.7074962457 -0.834417436 -0.5799779772  
C -2.6343019303 0.5213683949 -1.7398384395  
H -2.9149593511 -0.4848448124 -2.0738079082  
O -2.1223618134 -2.3326935646 -1.8289129513  
O 0.0157391533 -2.2524290384 -2.4116882522  
C 0.7951079187 -0.6184504201 -0.3120166379  
H 0.900227943 0.2540698076 0.3597529333  
H 1.2876822409 -0.3468305864 -1.2534397677  
C -1.3808725972 -1.3088062296 0.739891802  
H -1.0676836979 -2.3494024774 0.9159073198  
H -0.9374604515 -0.71673216 1.5619999749  
C -2.9013909382 -1.2409939033 0.856807902  
H -3.3740018028 -1.8074453056 0.045376123  
H -3.2181874199 -1.6712476191 1.8192797414  
H -3.2811775344 -0.2080831183 0.8317174524  
C 1.5414501278 -1.8077017333 0.2846614737  
H 1.4172859234 -2.6919879203 -0.3558712752  
H 2.6175088959 -1.5868017019 0.3524550208  
H 1.1949222189 -2.0551417911 1.2989569863  
C -3.7884716225 1.3568326509 -1.3406672542  
C -5.0699617561 0.9734510777 -1.7697277904  
C -3.669568017 2.5093857008 -0.5462440237  
C -6.1931047257 1.7114295011 -1.416291531  
H -5.1720561972 0.0886702892 -2.4015003941  
C -4.7927489443 3.2507665246 -0.1945376309  
H -2.6888954019 2.8348933093 -0.1933680533  
C -6.0580343293 2.8548408113 -0.6286954314  
H -7.1798878771 1.3954744808 -1.7602606561  
H -4.6805807106 4.143752504 0.4238633766  
H -6.9388817998 3.4383178705 -0.3525000306  
H -0.7664733144 2.6049393727 -1.4846107766  
C 0.1197967335 1.50479751 -3.016766331  
H 0.4386292995 2.4914274906 -3.3812811119  
Cs -1.8773135388 -2.3259350073 -4.7621097294  
C 0.8628539738 0.3797027632 -3.6740335101  
H 1.9408490859 0.5258064251 -3.4876095034  
H 0.5927907111 -0.6159881045 -3.2957242067

H 0.7293500679 0.4327787481 -4.7669080568

Mecis\_Gamma Heckadd preTS

C 0.0164922234 2.0296814861 -0.193953301  
C -0.1327605152 1.1037281378 -2.8272316607  
Br -2.5722405263 2.3018627885 -4.2347095  
H -0.384128344 1.0861515139 0.1867015123  
O -2.7633140296 3.9836903694 -1.3912382089  
C -0.718811656 3.1755403539 -0.0329577428  
H -0.232737945 4.1207781694 -0.2914981711  
C -1.9897504163 3.3604644499 0.7803425544  
C -3.0589880222 3.9790986757 -0.1450983092  
O -4.1336220672 4.3665075956 0.3109747132  
C -2.5700403462 2.0626399741 1.3863265601  
H -1.7689611955 1.5482001345 1.943101256  
H -3.3113115228 2.3742748369 2.137409624  
C -1.7071421975 4.3388692287 1.9463578836  
H -2.664575668 4.4634474896 2.4748522178  
H -1.0087325753 3.8534289254 2.6495324466  
C -1.1857664831 5.7186990132 1.5582395849  
H -1.8416633674 6.1955745858 0.8135303484  
H -1.1575499962 6.3744286508 2.4407297213  
H -0.1653854166 5.6902410372 1.1476962752  
C -3.2500943036 1.0892944407 0.4285203565  
H -2.5842287371 0.735352294 -0.3706135536  
H -3.6195824454 0.2085722506 0.9742378507  
H -4.1189410583 1.5640458189 -0.0529057368  
C 1.4570224223 1.9806980877 -0.5368237818  
C 2.1690448756 3.0899176387 -1.0142041027  
C 2.1411277127 0.7714290143 -0.3716576105  
C 3.5246025553 2.9905819836 -1.3082532784  
H 1.6569591252 4.0399549685 -1.1807417059  
C 3.5002977168 0.6704201256 -0.6604502358  
H 1.5933174362 -0.1070790466 -0.022422613  
C 4.1978731369 1.7806254374 -1.1301548815  
H 4.060464553 3.8644603848 -1.6850069134  
H 4.0140071391 -0.2836827429 -0.5245033058  
H 5.2620042019 1.7045826384 -1.3634852921  
Pd -1.3615563685 2.4805646621 -2.0831934976  
H 0.8052979083 1.5471765212 -3.1887366984  
C -0.3198742192 -0.2135143672 -2.9028106947  
H 0.4986612424 -0.811581705 -3.3271172168  
Cs -5.3933955513 3.5972756695 -2.4731588727  
C -1.5386497685 -0.9772311715 -2.4722231894  
H -1.8122472854 -1.7385448323 -3.2195386986  
H -1.3713923351 -1.5099999587 -1.5190569003  
H -2.3999088866 -0.3053375279 -2.3474832316

Mecis\_Gamma Heckadd TS

C -0.0201304357 1.8738980788 -0.6991242448  
C -0.1901054475 1.2075785007 -2.5635825807  
Br -3.0661083745 2.0257410404 -4.3040219597  
H -0.3527835548 0.9653330809 -0.1911034433  
O -2.9588602445 4.1231285331 -1.4374636698

C -0.8087895417 3.0492073879 -0.4473445787  
H -0.2735558397 3.9935232005 -0.5975721201  
C -1.9561745467 3.2189036537 0.5575342242  
C -3.0555222126 4.0599470301 -0.1517451029  
O -3.9871271541 4.5407176846 0.4816888826  
C -2.6168902524 1.8967744422 1.0309762345  
H -1.8232681356 1.1614151558 1.2430691169  
H -3.0891912416 2.1041213482 2.0029466949  
C -1.4620041677 3.9683377241 1.8155703328  
H -2.357530255 4.1546531418 2.4285675226  
H -0.8078143029 3.2902694929 2.3912729405  
C -0.7510600726 5.2958021539 1.5753818523  
H -1.3542522614 5.9577862247 0.9343776836  
H -0.590406278 5.8187533246 2.5295990718  
H 0.2364556435 5.1690544239 1.1067589272  
C -3.6781907429 1.2744175044 0.1251318748  
H -3.334104471 1.1513329758 -0.9141261493  
H -3.9780988098 0.2854663086 0.5021752055  
H -4.5779689129 1.9084531437 0.1161092743  
C 1.4737029341 1.9858925662 -0.7356918412  
C 2.1289391859 3.0922732068 -1.2898182721  
C 2.2418400695 0.9561643251 -0.1846572297  
C 3.5184825642 3.1711013691 -1.2766831954  
H 1.5474682373 3.8925932831 -1.7543538008  
C 3.632868539 1.0370896319 -0.1635540875  
H 1.7418577534 0.0777970472 0.2324065953  
C 4.2762341499 2.1460769907 -0.7091734333  
H 4.0141508403 4.0390188745 -1.7168370393  
H 4.2162985398 0.2266740597 0.2788077327  
H 5.366308238 2.2102007416 -0.6982706732  
Pd -1.6652242973 2.6255915845 -2.2224245601  
H 0.6135014585 1.6513267232 -3.1619736969  
C -0.4239047646 -0.1096625372 -2.6803625504  
H 0.1619394939 -0.6532289979 -3.432454389  
Cs -5.5778911546 3.722081818 -2.4581128333  
C -1.4492893697 -0.9100931723 -1.9469227517  
H -2.3470563865 -1.0164394285 -2.5794467445  
H -1.0846457048 -1.9214317163 -1.7116901805  
H -1.7722787144 -0.4223619247 -1.0165410385

Mecis\_Gamma\_Heckadd\_postTS

C 0.0691936454 1.6452343646 -1.0553663168  
C -0.1952725294 1.5232724303 -2.5516726824  
Br -4.1091391972 1.9067734032 -4.0942590688  
H -0.2884416035 0.7386003509 -0.5491756701  
O -3.2120432713 3.8731409932 -1.3364828005  
C -0.9232304129 2.7823254398 -0.8767424589  
H -0.4542701694 3.7289560493 -1.1821642762  
C -1.7669711692 3.0112606254 0.3844476397  
C -3.0039456857 3.8286049984 -0.0591324434  
O -3.7742961231 4.3208498913 0.7566709722  
C -2.289394768 1.7162920553 1.0549167333  
H -1.4363653482 1.0328015456 1.2001158412  
H -2.6247727633 1.9918477811 2.0665595182

C -0.9709640226 3.7907625442 1.4559190444  
H -1.6812028902 4.0080331182 2.269466215  
H -0.1973488848 3.1210960031 1.8704550994  
C -0.3284184049 5.0962754539 1.0013709385  
H -1.0591179661 5.7445909791 0.4922119646  
H 0.0578007298 5.6520669478 1.8684940957  
H 0.5197484292 4.9302450878 0.3206936172  
C -3.4350089007 0.9822532873 0.3643614232  
H -3.2287669152 0.7657712627 -0.6944384864  
H -3.6500204362 0.0303999212 0.8721702441  
H -4.3538770467 1.5873962151 0.4060259315  
C 1.4912642961 1.9105218948 -0.6236376139  
C 2.2312200251 2.966563409 -1.1706205779  
C 2.0863796092 1.1272053507 0.3700693391  
C 3.528826748 3.2290773442 -0.737724172  
H 1.7870907556 3.601043197 -1.9425869707  
C 3.3838302266 1.3882971315 0.8092302955  
H 1.522091452 0.2998298899 0.8094359083  
C 4.1098158594 2.440858564 0.2557426755  
H 4.0896096887 4.0570546605 -1.1771272669  
H 3.829187559 0.7651037328 1.5879947915  
H 5.1262609206 2.6479577892 0.597258253  
Pd -2.1830743995 2.4107010873 -2.4217624946  
H 0.3805032446 2.194169728 -3.1988421507  
C -1.0842114968 0.6437555083 -3.1530670904  
H -1.1322877563 0.6870192186 -4.2460414193  
Cs -6.0299820077 3.5950906527 -1.6102388424  
C -1.6510005607 -0.6169536173 -2.5586481007  
H -2.7021300002 -0.7338579717 -2.8574028734  
H -1.0930304857 -1.4851558848 -2.9467032936  
H -1.5944169734 -0.6418474333 -1.462451471

Mecis Beta Habst preTS

H -0.2744000897 -0.9535422693 -1.4754793231  
C -1.0247522803 -0.6371145534 -0.6213725923  
C -1.483706184 1.2900101866 0.8484589018  
Br -2.9768589651 -2.646237606 -4.2472101057  
Pd -1.4589265804 -1.6963661345 -2.6693065123  
C -0.5640493088 0.8520062849 -0.3463088392  
C -2.414526645 -0.7319180022 -1.2220495464  
H -2.7286821277 0.1995558311 -1.6945622812  
O -1.0284724811 1.1902739619 2.0089179758  
O -2.6636159028 1.5846073102 0.5486316491  
C 0.9474016934 0.9744779873 -0.0395994425  
H 1.0958040199 2.0131603417 0.2884126646  
H 1.4827328564 0.8874252831 -1.0039174693  
C -0.8583066646 1.7417218224 -1.5748637951  
H -0.4299327028 1.2651331792 -2.4768844955  
H -1.9426453098 1.7962361328 -1.7172095631  
C -0.3644656467 3.1824350671 -1.4711398345  
H 0.731414301 3.2647359127 -1.4894792628  
H -0.7514004111 3.7707873679 -2.3161223322  
H -0.7295498565 3.653625256 -0.545321118  
C 1.6496031961 0.0835056656 0.9824148452

H 1.7588196554 -0.9544113101 0.6426066723  
H 2.6633179414 0.4770954099 1.15638626  
H 1.1092728628 0.0936967005 1.9364704403  
C -3.5922421037 -1.3624448037 -0.568786111  
C -3.6281446546 -2.668744741 -0.0588219642  
C -4.7513869801 -0.5754523261 -0.4587941774  
C -4.7667401298 -3.1518580281 0.5839427983  
H -2.7664271884 -3.3201696223 -0.188945618  
C -5.8941392449 -1.0605966405 0.1734117521  
H -4.7296120108 0.4449611997 -0.8449623696  
C -5.9024410798 -2.349790274 0.7096889729  
H -4.7756317967 -4.1753474827 0.9652633956  
H -6.7845891719 -0.4308397972 0.2397867785  
H -6.7994785336 -2.7391012033 1.1969329949  
C -0.7806694385 -1.5601332665 0.5482283564  
H -0.9820185734 -1.0837756842 1.5098534936  
C -0.3156859057 -2.8126757395 0.5717017163  
H -0.2382478897 -3.272346027 1.5639147201  
Cs -3.6439790002 -0.0267534886 2.8019964337  
C 0.1324619736 -3.6808939842 -0.5655141966  
H 0.9666937867 -4.3244542034 -0.250490129  
H -0.676846415 -4.3475192332 -0.9102152588  
H 0.4690049869 -3.1064904797 -1.4410784839

#### Mecis Beta Habst TS

H -0.0651578993 -1.0153483441 -1.7746500302  
C -1.2033677873 -0.5286537585 -0.487195045  
C -1.3539263743 1.396610617 0.9498721926  
Br -0.4226717308 -2.5185949009 -4.536290283  
Pd -1.2829513446 -1.4793081236 -2.5507761874  
C -0.5898254161 0.9002734994 -0.3558117462  
C -2.5001008694 -0.6038746331 -1.0681256688  
H -2.8233430909 0.3178435916 -1.5521014619  
O -0.7703711097 1.277083623 2.0456865043  
O -2.5448951673 1.736063734 0.7760183827  
C 0.9512264113 0.9496446878 -0.2311803705  
H 1.1883206429 1.9733991563 0.0905876743  
H 1.3558440426 0.8569014461 -1.2563589108  
C -0.9864559484 1.8254584893 -1.5278699914  
H -0.6857096104 1.352579354 -2.4802373037  
H -2.0766812727 1.9314639054 -1.5356311706  
C -0.419377891 3.2412164539 -1.4552986086  
H 0.6684235941 3.2765500989 -1.6075512176  
H -0.8782459457 3.8644026613 -2.2369205656  
H -0.6474544294 3.7077079924 -0.4842861706  
C 1.7396048384 0.0078330326 0.6748366739  
H 1.7153027198 -1.0354883647 0.3330287089  
H 2.7944174449 0.3233587012 0.6734597211  
H 1.3715606397 0.0585829095 1.7069775271  
C -3.6694295169 -1.3524596891 -0.5468774753  
C -3.6902742647 -2.7054791289 -0.1801694724  
C -4.8340610418 -0.5897507395 -0.3345740079  
C -4.8163116525 -3.2612843033 0.4278752673  
H -2.8283367151 -3.3348191277 -0.3858300893

C -5.958252549 -1.1450984575 0.2710063301  
H -4.8260380206 0.4674420639 -0.6098819793  
C -5.9492244655 -2.4844001402 0.6678547036  
H -4.8107393183 -4.3186152739 0.7018065947  
H -6.8476634727 -0.5302651657 0.4284974413  
H -6.8311779762 -2.9269889901 1.1361874443  
C -0.8167077774 -1.4489683573 0.630093605  
H -0.6770414899 -0.875630224 1.5510691354  
C -0.531182683 -2.7556359994 0.7183673426  
H -0.2578217808 -3.0901368946 1.7273209111  
Cs -3.4002123884 -0.1641548556 2.836354734  
C -0.4150295786 -3.8249675652 -0.3205954954  
H 0.6317574995 -4.1645677021 -0.3803968109  
H -1.0114686186 -4.7085335733 -0.0405270182  
H -0.7109913167 -3.5049146502 -1.3291785458

Mecis Beta Habst postTS

H -1.0166262301 -0.5052355141 -3.1883267084  
C -1.1817702568 -0.5534021488 -0.4026786267  
C -1.3225576667 1.373675384 0.9989554085  
Br 0.1907871636 -2.7479627221 -4.1132974385  
Pd -0.9355556713 -1.6790689039 -2.2708180437  
C -0.56789983 0.866603535 -0.3126389068  
C -2.4269178476 -0.7055018923 -1.050331592  
H -2.7307927702 0.1618794646 -1.633373472  
O -0.749370403 1.2212271889 2.0963116142  
O -2.500443767 1.7528702108 0.8213431133  
C 0.9751001392 0.9218422099 -0.2079893477  
H 1.2162968697 1.9445887983 0.1151545212  
H 1.3647924358 0.8270586246 -1.2371997032  
C -0.9850110753 1.79694437 -1.4726832771  
H -0.6336667689 1.3676223242 -2.4265406414  
H -2.0787226363 1.8503579825 -1.5049317623  
C -0.4843573227 3.2345245278 -1.3537972236  
H 0.6054979262 3.3184070287 -1.4689920136  
H -0.9439206003 3.8544254575 -2.1378720832  
H -0.7655348927 3.6684896465 -0.3821049353  
C 1.7728510634 -0.0240805049 0.6842409183  
H 1.7391202936 -1.0652121537 0.336096563  
H 2.8291521188 0.286225164 0.6689060662  
H 1.4214982316 0.023817451 1.7226250298  
C -3.6320378119 -1.4120928623 -0.5382623389  
C -3.7100257305 -2.7214227 -0.0426323119  
C -4.786920974 -0.6100577876 -0.4461685007  
C -4.8766899057 -3.1920704641 0.5626100016  
H -2.8621839251 -3.3934149792 -0.133365243  
C -5.9517949347 -1.078500955 0.1554070625  
H -4.7430462739 0.41690051 -0.8153602532  
C -5.9993111789 -2.3735355424 0.6759181099  
H -4.9087137661 -4.2183882628 0.9353455072  
H -6.8278619952 -0.4283740135 0.2145443224  
H -6.912579555 -2.7499033203 1.1420093141  
C -0.7845713125 -1.4601905139 0.7161352131  
H -0.6127921171 -0.9099554422 1.6461682666



C -0.5185160071 -2.7728778369 0.7384396398  
H -0.2102331575 -3.1835508439 1.7064599677  
Cs -3.4562497947 -0.1516780974 2.8075728741  
C -0.4441336271 -3.7465995237 -0.3977019342  
H 0.5886384326 -3.8443892372 -0.7678817253  
H -0.7705646705 -4.7510763582 -0.0882879365  
H -1.0883971979 -3.5124412977 -1.2724134944

Mecis Gamma Habs preTS

C 0.0907096647 1.9024804471 0.3308450963  
H 0.9106485004 1.7696212508 -0.3931385315  
Br -3.3576234609 -0.2050475572 -3.2363294988  
Pd -1.9612044407 1.3614388646 -1.6819884662  
O -3.0704294601 3.0728112012 -1.9289241655  
C -1.0085104025 2.6575615441 -0.456841125  
H -0.517141817 3.3318318341 -1.1743910932  
C -2.1238323642 3.4561384151 0.2567054146  
C -3.1998586026 3.7351422962 -0.819666487  
O -4.1519568765 4.4754812774 -0.6110424748  
C -2.8310704944 2.717907643 1.4252942244  
H -2.0619639882 2.3744356299 2.1340059562  
H -3.421344175 3.476801596 1.9624227381  
C -1.643512192 4.8193633321 0.8156294979  
H -2.5585208782 5.3735537584 1.0783793508  
H -1.0910470026 4.6511905936 1.7527286772  
C -0.8008965704 5.6701736685 -0.1257827628  
H -1.2898645601 5.7915087331 -1.105732773  
H -0.6535179264 6.6756109893 0.295937517  
H 0.1957527038 5.2361320669 -0.2946088566  
C -3.759252175 1.5540418451 1.0937340552  
H -3.2538750244 0.7323296409 0.5661617009  
H -4.1919251898 1.1410357724 2.0171261096  
H -4.5994244295 1.8927671061 0.4675441541  
C -0.4093050984 0.4960143531 0.6077466534  
C -0.5760738194 -0.0753583489 1.8681937328  
C -0.8191299093 -0.249873694 -0.5169788461  
C -1.1520084154 -1.3404736324 1.9999362335  
H -0.2653726109 0.4682895528 2.7617202417  
C -1.406491542 -1.5104252265 -0.387552133  
H -0.5017925337 0.081312952 -1.5478708727  
C -1.5766680906 -2.0572735166 0.8811852798  
H -1.2762902909 -1.7698778663 2.9969548443  
H -1.7429503274 -2.0340658208 -1.2838346455  
H -2.0369260294 -3.0400531007 0.9988115806  
C 0.6513662529 2.6440793926 1.5135319529  
H 0.0663158497 2.6102620701 2.4379510139  
C 1.7686017162 3.3799472361 1.5296674305  
H 2.0236404806 3.8780515592 2.4723179808  
Cs -5.7724876749 2.3285797534 -2.5482355329  
C 2.7179398463 3.6336301823 0.3986196812  
H 3.740286445 3.3236334013 0.6682950141  
H 2.43619013 3.1133584995 -0.5268702564  
H 2.7647427835 4.7114483052 0.1728593889

Mecis Gamma Habs TS

C -0.0213976041 1.7921318359 0.3006244751  
H 0.16167205 1.1388618697 -1.0849574517  
Br -1.0622893537 1.0805321225 -4.0198398818  
Pd -0.8153831906 2.1938531021 -1.7600242309  
O -2.2080758275 3.8174290562 -1.9477598783  
C -0.8187091386 2.9852623623 0.10931764  
H -0.2030552728 3.8883226595 0.0422061374  
C -2.2720192921 3.3608817718 0.43270301  
C -2.848502563 4.0456221572 -0.8491419291  
O -3.9000145034 4.6674668254 -0.7958644983  
C -3.2600261846 2.2158718692 0.7811867952  
H -2.8301663257 1.5997923408 1.5810805896  
H -4.1439355067 2.705966762 1.2166399725  
C -2.3053480649 4.3614850277 1.6111639815  
H -3.3509083327 4.6946348653 1.6949574001  
H -2.0655861624 3.81363552 2.5392466952  
C -1.4141103878 5.5928721362 1.4859295595  
H -1.5811162198 6.1058995299 0.525738061  
H -1.6449848572 6.3111316907 2.2863261722  
H -0.3427166861 5.3544262681 1.5661896429  
C -3.7456001579 1.3237787466 -0.3577341714  
H -2.9240423707 0.909353886 -0.9615040055  
H -4.3265773384 0.4793916301 0.0406991939  
H -4.4105347426 1.8913316928 -1.0277345608  
C -0.5811507261 0.5986808541 1.0468980791  
C -0.6173128431 0.6674835935 2.4465869666  
C -1.041553481 -0.5579774774 0.4179899723  
C -1.1305017076 -0.3854024684 3.1969648751  
H -0.2583408326 1.5694276584 2.9497446573  
C -1.5569104506 -1.6148104337 1.1695547235  
H -1.011308249 -0.625380726 -0.6725266487  
C -1.608232541 -1.5310084138 2.5581895783  
H -1.1627445371 -0.3101345183 4.2860382241  
H -1.9199429513 -2.5095911911 0.6594599966  
H -2.0147455828 -2.3576140485 3.144763888  
C 1.4494587895 1.9925285759 0.5865760337  
H 1.7968739554 1.4291353357 1.4576569922  
C 2.3538630783 2.7407652511 -0.0586965469  
H 3.3603092034 2.7355158026 0.3742038268  
Cs -4.0460248148 3.0741515627 -3.9784015682  
C 2.1833484281 3.5780394834 -1.288479218  
H 3.1152570048 3.6051447792 -1.8704267335  
H 1.3755212001 3.2064702647 -1.9420351578  
H 1.9314976287 4.6201559189 -1.0289932509

Mecis Gamma Habs postTS

C -0.0522711742 1.8195994342 0.4081123148  
H 0.1935744006 0.8358085199 -1.7621460915  
Br -1.1167999466 1.2486498906 -4.1148684429  
Pd -0.7475640979 2.0229186644 -1.7969885538  
O -2.0866062117 3.7275570402 -1.935160675  
C -0.807179296 2.9630036512 0.1586941123  
H -0.2103858621 3.8549393819 -0.0439696741

C -2.2611569248 3.3482864096 0.4257696478  
C -2.7814143881 3.9912351061 -0.8877598751  
O -3.837536541 4.6167519911 -0.9058886629  
C -3.267167822 2.2255938208 0.7881730616  
H -2.8601800916 1.6288427302 1.6142430836  
H -4.1551458168 2.7371310454 1.1897518837  
C -2.3059484306 4.390662018 1.5683661352  
H -3.346152517 4.748073626 1.607706344  
H -2.1058725675 3.870787215 2.521143594  
C -1.3814225637 5.5954865401 1.426521855  
H -1.5073809206 6.0786866864 0.4446746571  
H -1.616137664 6.3468441501 2.1946750436  
H -0.3194637711 5.3322233976 1.5453945365  
C -3.7339483297 1.3068103111 -0.3370758393  
H -2.9013278596 0.8692076469 -0.9074551424  
H -4.3319796082 0.4785541877 0.0697169124  
H -4.37536221 1.8591415755 -1.0415373258  
C -0.612012767 0.6173276294 1.1253000583  
C -0.6584976972 0.6813026378 2.5260397362  
C -1.0322527583 -0.5554547775 0.4957268338  
C -1.1482305658 -0.38453504 3.2747564732  
H -0.3200535437 1.5907896465 3.0298747758  
C -1.5251401421 -1.6244371005 1.245079175  
H -0.9847470901 -0.6244762097 -0.5924338452  
C -1.5909048044 -1.542117201 2.633498246  
H -1.1878716199 -0.3099881691 4.3637416781  
H -1.858696987 -2.5296561444 0.7329934397  
H -1.9795071474 -2.3795039503 3.2170663428  
C 1.4383756028 1.893797128 0.5153742494  
H 1.8437152209 1.1614557694 1.2206728932  
C 2.3286487702 2.6997562113 -0.0845629281  
H 3.370044228 2.5546350899 0.2220636274  
Cs -4.0884382608 3.3006542733 -3.9052316097  
C 2.0976634036 3.7408343975 -1.135699901  
H 3.0179315599 3.9314342665 -1.7046388107  
H 1.308883507 3.4333407732 -1.8453584575  
H 1.7798513054 4.7035707293 -0.6998328756

Methylcis5-endo-trig TS

C -0.669547451 2.4754349093 1.0362757644  
O -1.2999475148 0.7578833008 -0.0384008013  
H -1.4041252978 2.2107353495 1.7916874447  
Pd -0.8027212638 5.0700358524 0.9212119795  
C -1.0606304534 3.2793455073 -0.0652284368  
H -0.2466116084 3.3896512028 -0.7916047345  
C -2.312683441 2.8076483911 -0.7882068159  
C -1.9788947938 1.2818184931 -0.98769012  
O -2.2994683145 0.705137043 -2.0252630644  
C -3.6736401278 2.9129176272 -0.0578918147  
H -3.8576975667 3.9796573021 0.1481352803  
H -4.4291657023 2.6129360936 -0.8018671052  
C -2.475445337 3.5168975126 -2.1467866308  
H -3.3020454937 3.0158760562 -2.6715388922  
H -2.7937622291 4.5539699912 -1.9497847138

C -1.2633110353 3.5404957271 -3.0720380075  
H -0.9351077004 2.5139700691 -3.3010239029  
H -1.5325428787 4.0052507059 -4.0318266655  
H -0.4260340567 4.1261887755 -2.6614594367  
C -3.91572444 2.0925938307 1.2071682057  
H -3.360380036 2.4820866771 2.0711767806  
H -4.9827798235 2.135594281 1.4726003126  
H -3.6464302504 1.0356401215 1.068738349  
C 0.7215859855 2.0569303734 1.3097103402  
C 1.8418969908 2.7215345419 0.785668281  
C 0.9086875208 0.8579401436 2.01302161  
C 3.1158201118 2.1778810164 0.944353446  
H 1.7222759862 3.6801254367 0.2691400085  
C 2.1809797251 0.3096580289 2.1549361441  
H 0.0360268124 0.3345477034 2.408099999  
C 3.2893915304 0.9661258012 1.6164414772  
H 3.9799182806 2.7162684598 0.5484499919  
H 2.3092738423 -0.6315599969 2.6939293941  
H 4.2896104036 0.5443691154 1.7393969168  
C -2.1238694293 4.7683829608 2.3490515464  
H -3.1563670226 5.0336708591 2.0748925801  
C -1.8487318287 4.4829826054 3.6290428498  
H -2.6650815792 4.5862639898 4.3595478981  
Br 0.8899495848 6.054435369 -0.6764234098  
Cs 1.0203936601 0.4372147601 -1.803392078  
C -0.5357369145 4.0285258474 4.1983925114  
H -0.6338257399 3.0355886444 4.6694263398  
H 0.2471190134 3.9693087143 3.4279956631  
H -0.1863235435 4.7169973329 4.9846993668

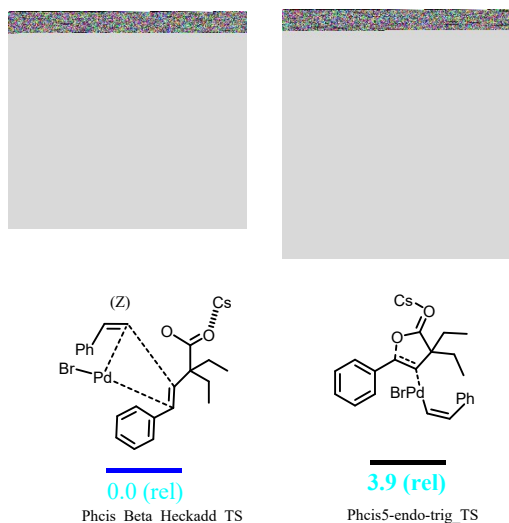

**Fig. S5** Computationally located transition states of Heck addition and lactonization for (*Z*)- $\beta$ -phenyl vinyl bromide.

|                                    | wB97X-D/BS1                                   |                   |          |              |                |            | wB97M-V/BS2                  |
|------------------------------------|-----------------------------------------------|-------------------|----------|--------------|----------------|------------|------------------------------|
|                                    | 1 <sup>st</sup> frequency (cm <sup>-1</sup> ) | Electronic energy | ZPE corr | Thermal corr | Enthalpy corr: | Gibbs corr | Electronic energy in toluene |
| ( <i>Z</i> )-2-bromoalkenylbenzene | 23.3                                          | -2882.61857       | 0.125417 | 0.137623     | 0.138837       | 0.077378   | -2882.629994                 |
| Phcis_Beta_Heckadd_TS              | -376.4                                        | -3724.33887       | 0.408436 | 0.451872     | 0.453085       | 0.319339   | -3724.375226                 |
| Phcis5-endo-trig_TS                | -311.9                                        | -3724.30096       | 0.407881 | 0.451597     | 0.45281        | 0.316569   | -3724.340653                 |

(*Z*)- $\beta$ -phenyl vinyl bromide

C 3.850227 0.496597 -1.179266  
 H 4.574594 0.863396 -1.907709  
 C 4.126739 -0.564801 -0.414785  
 H 5.126986 -0.97831 -0.589754  
 C 3.359989 -1.251352 0.640406  
 C 4.080141 -1.928488 1.638427  
 C 1.957929 -1.293134 0.687889  
 C 3.42615 -2.597743 2.668094  
 H 5.172864 -1.921813 1.606859  
 C 1.30428 -1.97125 1.713884  
 H 1.372016 -0.805023 -0.090462  
 C 2.032569 -2.618909 2.710588  
 H 4.00711 -3.109298 3.438473  
 H 0.212547 -1.996195 1.73097  
 H 1.515087 -3.146564 3.514669  
 Br 2.297241 1.562604 -1.14755

Phcis\_Beta\_Heckadd\_TS

C -0.0809834286 1.848455356 -0.7514214744  
 C -0.159994594 1.385543423 -2.6183515187  
 Br -2.8086728724 2.6226956203 -4.5134722313  
 H -0.5101881607 0.9402941759 -0.3200657979  
 O -3.1114894834 4.0052615111 -1.2925438767

C -0.7850393837 3.0711241657 -0.4254675382  
H -0.1692120568 3.9717255187 -0.5384191388  
C -1.8727516069 3.2561709293 0.6462890682  
C -3.174605109 3.772275448 -0.0240568192  
O -4.2013757458 3.8875689637 0.6345038047  
C -2.1892060559 1.9690841964 1.438182161  
H -1.2345947586 1.5202770101 1.7613790903  
H -2.7111753061 2.2681929048 2.3589368583  
C -1.4056826695 4.3352222833 1.6552363911  
H -2.1634737686 4.3748992045 2.4530101182  
H -0.4669575682 3.9867219587 2.1210044347  
C -1.2263475569 5.7418455553 1.0935445665  
H -2.1661782141 6.1194144172 0.663565094  
H -0.9230537296 6.4338297085 1.8928944949  
H -0.4571585717 5.7957009899 0.3086045034  
C -3.0510966791 0.9303339284 0.7272441716  
H -2.7088379991 0.7198681187 -0.2967125367  
H -3.0546387102 -0.0243938829 1.271838736  
H -4.0913088819 1.2840587288 0.6796890174  
C 1.4195071917 1.8398388223 -0.6668191274  
C 2.2059315363 2.8985397785 -1.1357664517  
C 2.0507614173 0.741766694 -0.0762079898  
C 3.5911342705 2.8609519563 -1.0068485423  
H 1.7320961845 3.7552743141 -1.6220145025  
C 3.4374846148 0.7060349015 0.0609648212  
H 1.4462246128 -0.0942766208 0.2858793563  
C 4.2123727176 1.7658890899 -0.404825588  
H 4.1911575841 3.6927544708 -1.3818770063  
H 3.9135588839 -0.155983892 0.5332572663  
H 5.2992207826 1.738863061 -0.3028883126  
Pd -1.64851129 2.7996015772 -2.2215707798  
H 0.6838211185 1.8408449932 -3.1477533213  
C -0.4304814396 0.0928847527 -2.8742563483  
H 0.1775982627 -0.4215234227 -3.6293294105  
C -1.5074339471 -0.7129079805 -2.2416454258  
C -1.2182268467 -1.6307963382 -1.2246467796  
C -2.8353102153 -0.5777784977 -2.6726377116  
C -2.235478746 -2.3712141548 -0.6229152785  
H -0.1832531102 -1.7589561997 -0.8966999226  
C -3.8474036542 -1.3317982575 -2.0806983398  
H -3.0492460752 0.1290667212 -3.479712237  
C -3.5547016772 -2.2215163898 -1.0468178766  
H -1.9950980979 -3.071781864 0.1797905163  
H -4.8770723222 -1.238402154 -2.4397674519  
H -4.3501825187 -2.8072415482 -0.5808919104  
Cs -5.4075453258 2.353142954 -2.0619562239

Phcis5-endo-trig\_TS

C -0.6673793325 2.1836898481 1.012701908  
O -1.3276667772 0.6457076535 -0.3112543438  
H -1.4210777816 1.817745726 1.7053639209  
Pd -0.7517878177 4.7670786856 1.3175352502  
C -1.023272291 3.144104043 0.0374704558  
H -0.1971394626 3.3472541019 -0.65241371

C -2.278753753 2.8113127541 -0.7585197917  
C -1.9967651081 1.3164239387 -1.1694846332  
O -2.3552773877 0.9008397151 -2.2699260313  
C -3.640904816 2.8640403198 -0.0179724845  
H -3.6927278693 3.8219863731 0.5228292817  
H -4.4137147539 2.9189222895 -0.8004366116  
C -2.4040873557 3.7130671421 -2.0027662896  
H -3.2694132698 3.3484642046 -2.5754279097  
H -2.6456341633 4.7315167841 -1.6557279011  
C -1.2079834833 3.778054871 -2.9467896473  
H -0.9925434405 2.7771128936 -3.3533150859  
H -1.4434519394 4.423366194 -3.8058642147  
H -0.3127257512 4.2073997707 -2.4705549301  
C -4.0303191706 1.7067201237 0.9009667564  
H -3.3636555756 1.5807763189 1.7649143267  
H -5.0419689025 1.8784841462 1.2988268582  
H -4.0428378149 0.7501272527 0.3587941202  
C 0.7091589518 1.7041983537 1.2603166179  
C 1.8537948673 2.4325957945 0.8992371532  
C 0.8593377836 0.3984107914 1.7500125061  
C 3.1159586824 1.8504150666 1.0049400338  
H 1.7596919025 3.4634982189 0.5419365578  
C 2.1208689651 -0.1850946832 1.838356916  
H -0.0318063319 -0.1736173763 2.0145712987  
C 3.2540571839 0.5381882036 1.4618483994  
H 3.9985680286 2.4353884309 0.7365110343  
H 2.220601066 -1.2078741986 2.208314074  
H 4.2452321653 0.0860602027 1.5432249215  
C -2.025353245 4.1790065505 2.7315839602  
H -2.8576233142 3.488807195 2.5629371694  
C -1.8099244694 4.6647946679 3.9670656227  
H -2.4417296767 4.3846578848 4.8190474003  
C -0.6681171805 5.5627825205 4.2020864919  
C 0.068422925 5.5651146643 5.3948397422  
C -0.2241443811 6.3862321847 3.1494177232  
C 1.2272948667 6.328057998 5.5069031514  
H -0.2584588068 4.93891894 6.2285516023  
C 0.9567846562 7.1230117873 3.246318261  
H -0.8970659606 6.5837907305 2.2870123517  
C 1.6855347293 7.0950731129 4.4313305794  
H 1.793172099 6.3140161829 6.4415335322  
H 1.2879582938 7.7154521479 2.3916504824  
H 2.6042234807 7.6775498459 4.5247126397  
Br 0.9026972057 5.8361722066 -0.3258194041  
Cs 1.0422695306 0.686727426 -2.0649811125
